# Supplementary material for: A gold-catalyzed cyclization/nucleophilic addition reaction of o-alkynylanilines with ynamides: stereoselective synthesis of 3-vinylindoles
Source: Royal Society of Chemistry journal article supplement (doi:10.1039/d3qo01753b), 2023-12-23
Supplement: d3qo01753b1.pdf [file d3qo01753b1.pdf]

## Supporting Information

### Gold-catalyzed cyclization/nucleophilic addition reaction of *o*-alkynylanilines with ynamides: stereoselective synthesis of 3-vinylindoles

Wenyi Luo <sup>a</sup>, Qiaolong Chen <sup>a</sup>, Xiaoyu Mo <sup>a</sup>, Jun Jiang<sup>\*a</sup> and Peng Xie <sup>\*a,b</sup>

<sup>a</sup>*School of Chemistry and Chemical Engineering, Guangxi University, Nanning, 530004, P. R. China.*

<sup>b</sup>*Guangxi Key Laboratory of Petrochemical Resource Processing and Process Intensification Technology, Guangxi University, Nanning 530004, P. R. China.*

E-mail: [jiangjun@gxu.edu.cn](mailto:jiangjun@gxu.edu.cn), [xiep@gxu.edu.cn](mailto:xiep@gxu.edu.cn)

#### Contents

|                                                                                   |     |
|-----------------------------------------------------------------------------------|-----|
| 1. General Information.....                                                       | 1   |
| 2. Experiment Section.....                                                        | 1   |
| 2.1. Preparation for the synthesis of <i>o</i> -alkynylaniline <sup>1</sup> ..... | 1   |
| 2.2. Preparation for the synthesis of ynamides <sup>2</sup> .....                 | 2   |
| 3. Experimental Procedure for the Synthesis of 3-vinylindoles.....                | 2   |
| 4. Control Experiment (Scheme 4).....                                             | 3   |
| 5. Characterization Data for Compounds.....                                       | 4   |
| 6. Single Crystal X-ray Structure Determinations of Compounds.....                | 10  |
| 7. Copies of NMR Spectra.....                                                     | 11  |
| 8. DFT calculation details.....                                                   | 46  |
| 9. Reference.....                                                                 | 154 |

## 1. General Information

All reactions were carried out in an air environment unless otherwise noted. All the reactions were monitored by thin layer chromatography (TLC), carried out on 0.25 mm silica gel plates using UV light as visualizing agent. Column chromatography was carried out on silica gel (particle size 300-400 mesh). Unless stated otherwise, all the yields refer to isolated products after flash column chromatography. The solvent mixtures employed in flash column chromatography purifications were reported as volume by volume and in percentages. The melting points were measured with SGW X-4 micro-melting-point apparatus. NMR spectra were recorded with BrukerAvance III HD500 and BrukerAvance III HD600 spectrometer at 500 MHz or 600 MHz. All  $^{13}\text{C}$ ,  $^1\text{H}$  and  $^{19}\text{F}$  NMR spectra were recorded using  $\text{CDCl}_3$  as solvent. Tetramethylsilane (TMS) signals or residual solvent signals were used [TMS  $\delta=0.00$  ( $^1\text{H}$  NMR),  $\text{CDCl}_3=7.26$  ppm ( $^1\text{H}$  NMR), 77.16 ppm ( $^{13}\text{C}$  NMR)] as internal standards. Coupling constants ( $J$ ) are reported in Hz. The following abbreviations were used to describe peak splitting patterns when appropriate: s = singlet, d = doublet, dd = double doublet, t = triplet, q = quartet, m = multiplet, td = triplet doublet, qd = quartet doublet, ddq = doublet doublet quartet. High-resolution mass spectra were recorded on Agilent 6545 Q-TOF LC/MS. The relative configuration of **3a** was determined by NMR Data, molecular weight compared and X-ray single crystal diffraction.

## 2. Experiment Section

### 2.1. Preparation for the synthesis of *o*-alkynylaniline<sup>1</sup>

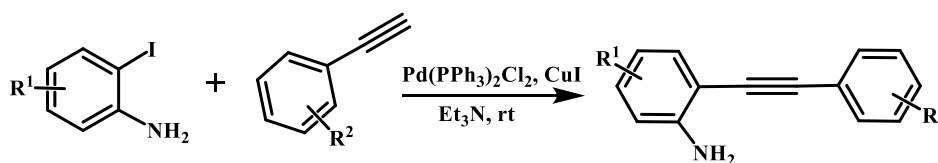

**Scheme S1.** Sonogashira coupling reaction

Under  $\text{N}_2$  atmosphere, terminal alkynes (6 mmol) was added to a solution of 2-iodoaniline (5 mmol),  $\text{Pd}(\text{PPh}_3)_2\text{Cl}_2$  (0.125 mmol, 87.8 mg) and  $\text{CuI}$  (0.25 mmol, 47.6 mg) in  $\text{Et}_3\text{N}$  (5 mL) was stirred at room temperature for 4 h. The reaction was monitored by TLC. Upon completion, the solvent was removed under reduced pressure, and the residue was extracted with  $\text{EtOAc}$  (3 x 5 mL). The combined organic layer was dried over  $\text{NaSO}_4$  and concentrated. The residue was purified by a silica gel flash column chromatography (petroleum ether/ethylacetate = 10/1) to afford product in good yields ranging from 95% to 99%.

## 2.2. Preparation for the synthesis of ynamides<sup>2</sup>

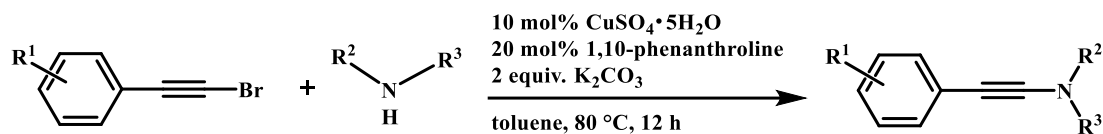

**Scheme S2.** The alkyne amination reaction

To a dry flask were added sulfonamide (1.09 g, 10 mmol), CuSO<sub>4</sub>·5H<sub>2</sub>O (249.7 mg, 1.0 mmol), 1,10-phenanthroline (360.4 mg, 2.0 mmol) and K<sub>2</sub>CO<sub>3</sub> (2.764 g, 20 mmol). Then toluene (40 mL) and (bromoethynyl)benzene (2.172 g, 12mmol) were added, and the resulting mixture was stirred at 80 °C for 12 h under an atmosphere of argon. When the reaction was complete, the crude mixture was cooled down to room temperature, filtered and washed with ethyl acetate. After solvent evaporation, the residue was purified by column chromatography on silica gel (eluent: petroleum ether: ethyl acetate = 5:1) to afford product (1.82 g, 87%).

## 3. Experimental Procedure for the Synthesis of 3-vinylindoles

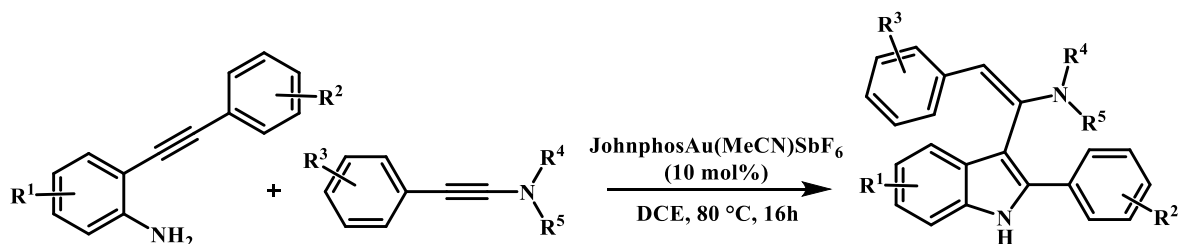

**Scheme S3.** The synthesis of 3-vinylindoles from *o*-alkynylanilines and ynamides

To a 10 mL oven-dried reaction vessel was charged with JohnphosAu(MeCN)SbF<sub>6</sub> (10 mol%), *o*-alkynylaniline (0.1 mmol) with anhydrous DCE (1.0 ml) at 80 °C for 4h. Then the resultant mixture was added ynamides (0.12mmol, 1.2 equiv.). The reaction vessel was stirred at 80 °C for 12 h. After the reaction is completed, the solution was purified by flash column chromatography on silica gel (petroleum ether/ethyl acetate = 10:1~ 5:1) to give the pure product as a yellow solid.

## 4. Control Experiments (Scheme 4)

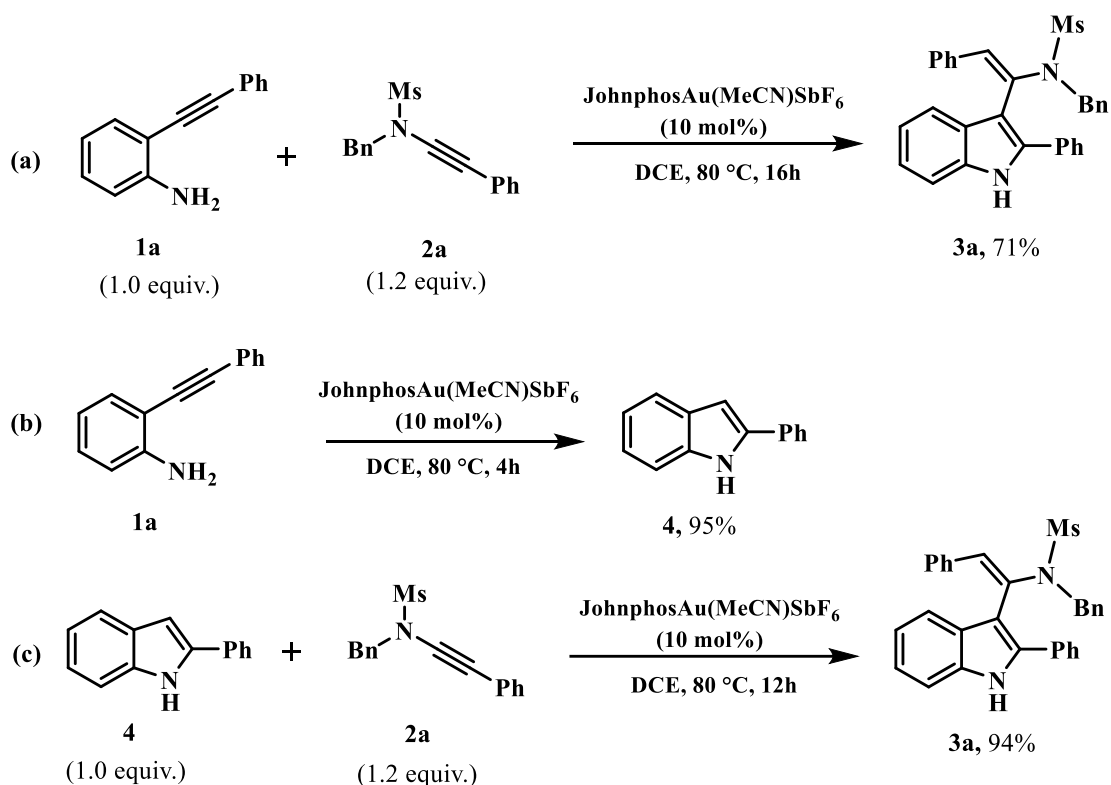

(a) In a 10 mL dried test tube, JohnphosAu(MeCN)SbF<sub>6</sub> (10 mol%), **1a** (0.1 mmol), and **2a** (0.12 mmol, 1.2 equiv.) were added along with anhydrous DCE (1.0 mL). The reaction mixture was heated at 80 °C for 16 hours. After completion of the reaction, the solution was purified by flash column chromatography on silica gel (petroleum ether/ethyl acetate = 5:1) to obtain a yellow solid (**3a**) as the pure product in 71% yield.

(b) In a 10 mL dried test tube, JohnphosAu(MeCN)SbF<sub>6</sub> (10 mol%), **1a** (0.1 mmol), and anhydrous dichloroethane (1.0 mL) were added. The reaction mixture was heated at 80 °C for 4 hours. After completion of the reaction, the solution was purified by flash column chromatography on silica gel (petroleum ether/ethyl acetate = 8:1) to obtain a white solid(**4**) as the pure product with a yield of 95%. **4** was detected by <sup>1</sup>H NMR, <sup>13</sup>C NMR and HRMS.

(c) In a 10 mL dried test tube, JohnphosAu(MeCN)SbF<sub>6</sub> (10 mol%), **4** (0.1 mmol), and **2a** (0.12 mmol, 1.2 equiv.) were added along with anhydrous DCE (1.0 mL). The reaction mixture was heated at 80 °C for 12 hours. After completion of the reaction, the solution was purified by flash column chromatography on silica gel (petroleum ether/ethyl acetate = 5:1) to obtain a yellow solid (**3a**) as the pure product in 94% yield.

## 5. Characterization Data for Compounds

### (E)-N-Benzyl-N-(2-phenyl-1-(2-phenyl-1H-indol-3-yl)vinyl)methanesulfonamide(3a).

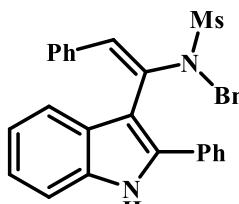

Yellow solid, 44.2 mg, 92% yield; m. p. 200-201 °C. <sup>1</sup>H NMR (500 MHz, Chloroform-*d*) δ 8.30 (s, 1H), 7.40 (m, 2H), 7.23 (m, 9H), 7.12 (m, 2H), 7.06 (m, 1H), 6.94 (m, 3H), 6.88 (m, 2H), 6.84 (s, 1H), 4.45 (m, 2H), 2.67 (s, 3H). <sup>13</sup>C NMR (126 MHz, Chloroform-*d*) δ 137.56, 137.22, 135.98, 135.81, 132.03, 131.12, 129.97, 128.77, 128.47, 128.37, 128.36, 128.11, 128.03, 127.95, 127.90, 127.34, 126.69, 123.00, 121.00, 120.43, 110.91, 107.40, 51.00, 40.90. HRMS (ESI) m/z calcd for C<sub>30</sub>H<sub>27</sub>N<sub>2</sub>O<sub>2</sub>S [M+H]<sup>+</sup>: 479.1713, found: 479.1784.

### (E)-N-Benzyl-N-(2-phenyl-1-(2-(p-tolyl)-1H-indol-3-yl)vinyl)methanesulfonamide

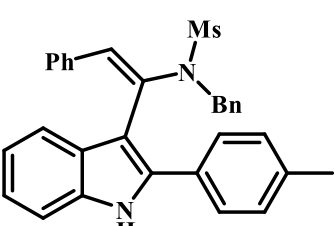

(3b). Yellow solid, 42.7 mg, 86% yield; m. p. 183-184 °C. <sup>1</sup>H NMR (500 MHz, Chloroform-*d*) δ 8.29 (s, 1H), 7.37 (m, 2H), 7.22 (m, 3H), 7.17 (m, 3H), 7.09 (dd, *J* = 6.6, 2.9 Hz, 2H), 7.03 (m, 3H), 6.93 (m, 5H), 6.86 (s, 1H), 4.43 (m, 2H), 2.64 (s, 3H), 2.32 (s, 3H). <sup>13</sup>C NMR (126 MHz, Chloroform-*d*) δ 138.43, 137.55, 137.19, 135.93, 135.74, 131.00, 130.42, 129.46, 129.15, 128.50, 128.27, 128.11, 128.09, 127.94, 127.74, 127.24, 126.76, 122.82, 120.87, 120.35, 110.83, 107.11, 50.94, 40.77, 21.25. HRMS (ESI) m/z calcd for C<sub>31</sub>H<sub>29</sub>N<sub>2</sub>O<sub>2</sub>S [M+H]<sup>+</sup>: 493.1866, found: 493.1937.

### (E)-N-Benzyl-N-(1-(2-(4-methoxyphenyl)-1H-indol-3-yl)-2-phenylvinyl) methanesulfonamide (3c).

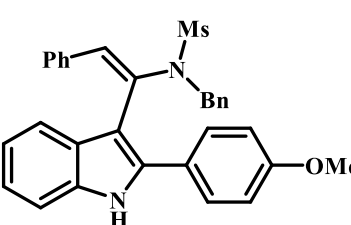

Yellow solid, 47.8 mg, 93% yield; m. p. 174-175 °C. <sup>1</sup>H NMR (500 MHz, Chloroform-*d*) δ 8.29 (s, 1H), 7.38 (m, 2H), 7.21 (m, 4H), 7.12 (m, 4H), 7.03 (m, 1H), 6.95 (m, 3H), 6.90 (dd, *J* = 7.7, 2.1 Hz, 2H), 6.85 (s, 1H), 6.72 (m, 2H), 4.47 (m, 2H), 3.76 (s, 3H), 2.69 (s, 3H). <sup>13</sup>C NMR (126 MHz, Chloroform-*d*) δ 159.75, 137.50, 137.26, 135.99, 135.71, 131.19, 130.25, 129.14, 128.48, 128.31, 128.15, 128.05, 127.95, 127.26, 126.74, 124.50, 122.69, 120.87, 120.18, 114.18, 110.82, 106.56, 55.32, 50.90, 40.84. HRMS (ESI) m/z calcd for C<sub>31</sub>H<sub>29</sub>N<sub>2</sub>O<sub>3</sub>S [M+H]<sup>+</sup>: 509.1815, found: 509.1888.

**(E)-N-Benzyl-N-(1-(2-(3-methoxyphenyl)-1H-indol-3-yl)-2-phenylvinyl)methanesulfonamide (3d).**

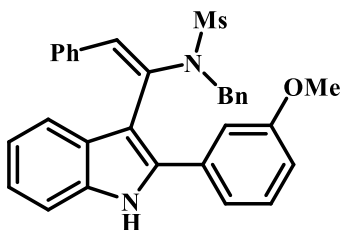

Yellow solid, 40.1 mg, 78% yield; m. p. 189-190 °C.  $^1\text{H NMR}$  (600 MHz, Chloroform-*d*)  $\delta$  8.33 (s, 1H), 7.45 (dd,  $J = 8.0, 1.1$  Hz, 1H), 7.41 (m, 1H), 7.20 (m, 5H), 7.07 (m, 3H), 6.97 (m, 3H), 6.93 (m, 4H), 6.80 (m, 2H), 4.41 (m, 2H), 3.48 (s, 3H), 2.64 (s, 3H).  $^{13}\text{C NMR}$  (151 MHz, Chloroform-*d*)  $\delta$  159.84, 137.04, 136.87, 135.77, 135.65, 133.35, 132.47, 130.38, 129.85, 128.58, 128.27, 128.06, 128.00, 127.28, 127.07, 123.15, 121.02, 120.59, 119.76, 115.12, 112.76, 110.94, 107.63, 55.06, 50.95, 40.56. **HRMS** (ESI)  $m/z$  calcd for  $\text{C}_{31}\text{H}_{29}\text{N}_2\text{O}_3\text{S}$   $[\text{M}+\text{H}]^+$ : 509.1816, found: 509.1891.

**(E)-N-Benzyl-N-(1-(2-(4-chlorophenyl)-1H-indol-3-yl)-2-phenylvinyl)ethanesulfonamide (3e).**

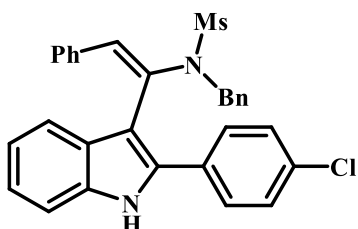

Yellow solid, 39.4 mg, 76% yield; m. p. 151-152 °C.  $^1\text{H NMR}$  (500 MHz, Chloroform-*d*)  $\delta$  8.36 (d,  $J = 14.8$  Hz, 1H), 7.56 (d,  $J = 7.8$  Hz, 1H), 7.40 (d,  $J = 8.1$  Hz, 1H), 7.24 (m, 4H), 7.13 (m, 3H), 7.04 (m, 2H), 6.92 (m, 5H), 6.77 (m, 3H), 4.54 (m, 2H), 2.85 (s, 3H).  $^{13}\text{C NMR}$  (126 MHz, Chloroform-*d*)  $\delta$  137.21, 136.75, 136.03, 135.92, 134.12, 131.46, 130.28, 129.21, 129.33 (d,  $J = 2.3$  Hz), 129.01, 128.68, 128.50, 128.38, 127.95, 127.90, 127.43, 126.66, 123.26, 121.25, 120.17, 111.19, 107.12, 50.89, 41.26. **HRMS** (ESI)  $m/z$  calcd for  $\text{C}_{30}\text{H}_{26}\text{ClN}_2\text{O}_2\text{S}$   $[\text{M}+\text{H}]^+$ : 513.1325, found: 513.1393.

**(E)-N-Benzyl-N-(1-(2-(4-bromophenyl)-1H-indol-3-yl)-2-phenylvinyl)methanesulfonamide (3f).**

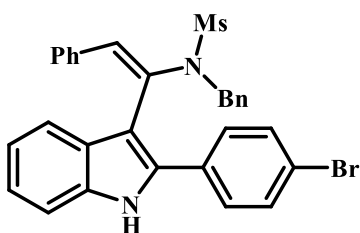

Yellow solid, 36.1 mg, 64% yield; m. p. 173-174 °C.  $^1\text{H NMR}$  (500 MHz, Chloroform-*d*)  $\delta$  8.25 (s, 1H), 7.58 (dd,  $J = 8.1, 1.1$  Hz, 1H), 7.40 (m, 1H), 7.25 (m, 4H), 7.20 (m, 2H), 7.14 (m, 3H), 6.93 (m, 3H), 6.85 (m, 2H), 6.80 (s, 1H), 6.76 (m, 2H), 4.55 (m, 2H), 2.87 (s, 3H).  $^{13}\text{C NMR}$  (126 MHz, Chloroform-*d*)  $\delta$  137.23, 136.75, 136.05, 135.91, 131.65, 131.43, 130.71, 130.14 (d,  $J = 6.1$  Hz), 129.34, 129.25, 128.71, 128.52, 128.39, 127.96, 127.94, 127.91, 127.43, 126.66, 123.32, 122.41, 121.32, 120.24, 50.88, 41.26. **HRMS** (ESI)  $m/z$  calcd for  $\text{C}_{30}\text{H}_{26}\text{BrN}_2\text{O}_2\text{S}$   $[\text{M}+\text{H}]^+$ : 557.0873, found: 557.0880.

**(E)-N-Benzyl-N-(1-(2-(4-fluorophenyl)-1H-indol-3-yl)-2-phenylvinyl)methanesulfonamide (3g).**

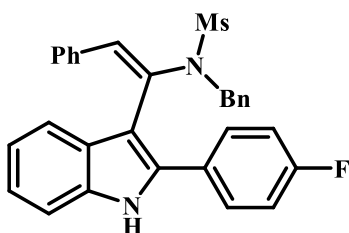

Yellow solid, 26.6 mg, 53% yield; m. p. 168-169 °C.  $^1\text{H NMR}$  (500 MHz, Chloroform-*d*)  $\delta$  8.33 (m, 1H), 7.53 (d,  $J = 8.0$  Hz, 1H), 7.39 (d,  $J = 8.1$  Hz, 1H), 7.24 (m, 4H), 7.13 (m, 3H), 6.99 (m, 2H), 6.91 (m, 3H), 6.78 (m, 5H), 4.50 (m, 2H), 2.83 (d,  $J = 1.4$  Hz, 3H).  $^{13}\text{C NMR}$  (126 MHz, Chloroform-*d*)  $\delta$  162.61 (d,  $J = 248.8$  Hz), 137.34, 137.10, 136.15, 135.87, 135.85, 131.67, 129.73, 129.67, 129.06 (t,  $J = 2.9$  Hz), 128.72, 128.53, 128.41, 128.01, 127.47, 126.65, 123.12, 121.22, 120.17, 115.57 (d,  $J = 21.6$  Hz), 111.15 (d,  $J = 3.1$  Hz), 106.86 (d,  $J = 2.9$  Hz), 50.97, 41.32.  $^{19}\text{F NMR}$  (471 MHz, Chloroform-*d*)  $\delta$  -112.88. **HRMS** (ESI)  $m/z$  calcd for  $\text{C}_{30}\text{H}_{26}\text{FN}_2\text{O}_2\text{S}$   $[\text{M}+\text{H}]^+$ : 497.1612, found: 497.1682.

**(E)-N-Benzyl-N-(1-(6-chloro-2-phenyl-1H-indol-3-yl)-2-phenylvinyl)methanesulfonamide (3h).**

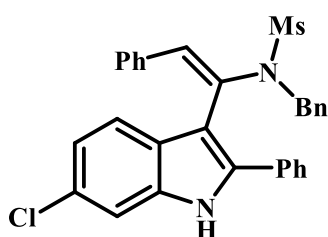

Yellow solid, 19.1 mg, 37% yield; m. p. 145-146 °C.  $^1\text{H NMR}$  (500 MHz, Chloroform-*d*)  $\delta$  8.43 (s, 1H), 7.28 (m, 9H), 7.10 (m, 4H), 6.97 (q,  $J = 6.7, 6.1$  Hz, 3H), 6.90 (m, 2H), 6.86 (s, 1H), 4.41 (s, 2H), 2.58 (s, 3H).  $^{13}\text{C NMR}$  (126 MHz, Chloroform-*d*)  $\delta$  138.61, 136.68, 135.63, 134.06, 131.61, 130.69, 130.10, 129.13, 128.93, 128.79, 128.44, 128.39, 128.15, 128.07, 127.92, 127.53, 126.98, 126.52, 123.35, 119.77, 111.96, 107.37, 51.18, 40.64. **HRMS** (ESI)  $m/z$  calcd for  $\text{C}_{30}\text{H}_{26}\text{ClN}_2\text{O}_2\text{S}$   $[\text{M}+\text{H}]^+$ : 513.1324, found: 513.1393.

**(E)-N-Benzyl-N-(1-(5-methoxy-2-phenyl-1H-indol-3-yl)-2-phenylvinyl)methanesulfonamide (3i).**

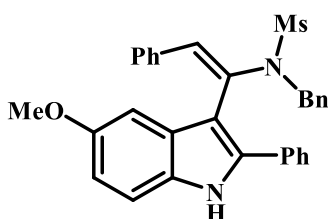

Yellow solid, 21.4 mg, 42% yield; m. p. 184-185 °C.  $^1\text{H NMR}$  (500 MHz, Chloroform-*d*)  $\delta$  8.26 (d,  $J = 12.2$  Hz, 1H), 7.29 (m, 2H), 7.25 (m, 4H), 7.21 (dd,  $J = 5.4, 1.8$  Hz, 3H), 7.10 (m, 2H), 6.96 (d,  $J = 1.4$  Hz, 5H), 6.82 (m, 2H), 6.73 (d,  $J = 2.4$  Hz, 1H), 4.40 (d,  $J = 15.0$  Hz, 2H), 3.60 (s, 3H), 2.60 (d,  $J = 1.0$  Hz, 3H).  $^{13}\text{C NMR}$  (126 MHz, Chloroform-*d*)  $\delta$  154.74, 137.88, 137.09, 135.98, 132.23, 130.96, 130.77 (d,  $J = 1.1$  Hz), 130.28, 128.83, 128.62, 128.48, 128.37, 128.32, 128.13, 127.99, 127.88, 127.33, 126.79, 113.56, 111.67 (d,  $J = 1.8$  Hz), 107.37 (d,  $J = 1.7$  Hz), 101.48, 55.47, 50.82, 40.89. **HRMS** (ESI)  $m/z$  calcd for  $\text{C}_{31}\text{H}_{29}\text{N}_2\text{O}_3\text{S}$   $[\text{M}+\text{H}]^+$ : 509.1817, found: 509.1890.

**(E)-4-Methyl-N-phenyl-N-(2-phenyl-1-(2-phenyl-1H-indol-3-yl)vinyl)benzenesulfo-**

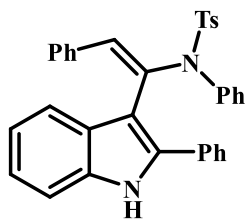

**namide (3j).** Yellow solid, 41.8mg, 78% yield; m. p. 225-226 °C.  $^1\text{H NMR}$  (500 MHz, Chloroform-*d*)  $\delta$  8.03 (s, 1H), 7.62 (m, 1H), 7.45 (m, 2H), 7.22 (m, 4H), 7.13 (m, 5H), 7.01 (m, 2H), 6.96 (m, 7H), 6.88 (m, 3H), 2.39 (s, 3H).  $^{13}\text{C NMR}$  (126 MHz, Chloroform-*d*)  $\delta$  143.26, 138.79, 138.20, 137.17, 136.20, 135.59, 133.63, 131.96, 130.04, 129.60, 129.27 (d,  $J = 5.9$  Hz), 128.40, 128.34, 128.23, 128.15, 128.06, 127.96 (d,  $J = 2.5$  Hz), 127.79, 127.76, 127.23, 126.59, 126.34, 122.46, 120.56 (d,  $J = 10.3$  Hz), 110.53, 108.63, 21.54. **HRMS** (ESI)  $m/z$  calcd for  $\text{C}_{35}\text{H}_{29}\text{N}_2\text{O}_2\text{S}$   $[\text{M}+\text{H}]^+$ : 541.1867, found: 541.1937.

**(E)-N-Benzyl-4-methyl-N-(2-phenyl-1-(2-phenyl-1H-indol-3-yl)vinyl)benzenesulfon-**

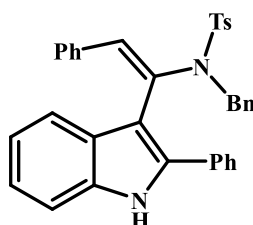

**amide (3k).** Yellow solid, 48.8mg, 88% yield; m. p. 155-156 °C.  $^1\text{H NMR}$  (500 MHz, Chloroform-*d*)  $\delta$  8.16 (s, 1H), 7.52 (m, 2H), 7.26 (d,  $J = 30.9$  Hz, 1H), 7.16 (m, 4H), 7.12 (m, 4H), 7.06 (m, 2H), 7.01 (t,  $J = 7.7$  Hz, 2H), 6.94 (m, 1H), 6.83 (m, 6H), 6.65 (m, 2H), 4.62 (m, 2H), 2.37 (s, 3H).  $^{13}\text{C NMR}$  (126 MHz, Chloroform-*d*)  $\delta$  143.19, 138.41, 138.29, 137.94, 136.64, 135.62, 132.34, 131.93, 129.48, 129.29, 128.33, 128.25, 128.25, 128.05, 127.82, 127.77, 127.75, 127.68, 127.66, 127.07, 126.05, 122.56, 120.62, 120.30, 110.72, 106.90, 52.02, 21.48. **HRMS** (ESI)  $m/z$  calcd for  $\text{C}_{36}\text{H}_{31}\text{N}_2\text{O}_2\text{S}$   $[\text{M}+\text{H}]^+$ : 555.2028, found: 555.2102.

**(E)-N-Benzyl-N-(2-(3-chlorophenyl)-1-(2-phenyl-1H-indol-3-yl)vinyl)methanesulfo-**

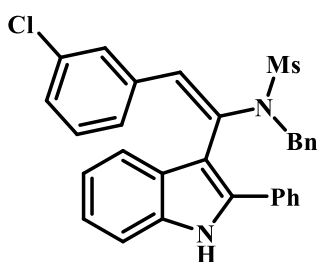

**namide (3m).** Yellow solid, 33.9mg, 66% yield; m. p. 169-170 °C.  $^1\text{H NMR}$  (600 MHz, Chloroform-*d*)  $\delta$  8.31 (s, 1H), 7.42 (m, 2H), 7.21 (m, 9H), 7.11 (m, 1H), 7.07 (m, 2H), 6.89 (m, 1H), 6.79 (t,  $J = 7.9$  Hz, 1H), 6.72 (t,  $J = 1.8$  Hz, 1H), 6.66 (m, 2H), 4.55 (m, 2H), 2.79 (s, 3H).  $^{13}\text{C NMR}$  (151 MHz, Chloroform-*d*)  $\delta$  138.30 (d,  $J = 14.8$  Hz), 137.23, 135.82, 133.66, 133.37, 131.73, 130.07, 128.99, 128.94, 128.72, 128.51, 128.43, 128.35, 128.11, 127.82, 127.67, 127.50, 126.32, 126.28, 123.12, 121.26, 120.07, 111.10, 106.43, 51.02, 41.26. **HRMS** (ESI)  $m/z$  calcd for  $\text{C}_{30}\text{H}_{26}\text{ClN}_2\text{O}_2\text{S}$   $[\text{M}+\text{H}]^+$ : 513.1320, found: 513.1389.



**(E)-N-Benzyl-N-(2-(4-chlorophenyl)-1-(2-phenyl-1H-indol-3-yl)vinyl)methanesulfonamide (3n).**

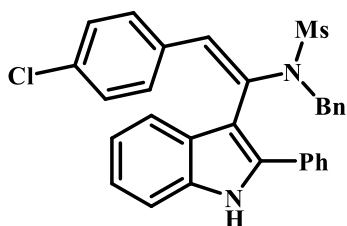

Yellow solid, 40.4mg, 79% yield; m. p. 223-224 °C.  $^1\text{H NMR}$  (600 MHz, Chloroform-*d*)  $\delta$  8.39 (dd,  $J = 15.1, 6.8$  Hz, 1H), 7.39 (d,  $J = 8.1$  Hz, 2H), 7.22 (m, 7H), 7.14 (m, 4H), 7.07 (dd,  $J = 8.2, 6.9$  Hz, 1H), 6.86 (m, 2H), 6.74 (m, 3H), 4.49 (m, 2H), 2.70 (d,  $J = 1.2$  Hz, 3H).  $^{13}\text{C NMR}$  (151 MHz, Chloroform-*d*)  $\delta$  137.91, 137.17, 135.88, 134.69,

132.24, 132.17, 131.90, 129.63, 128.78, 128.47, 128.13, 128.08, 127.87, 127.80, 127.72, 127.70, 127.48, 123.15, 121.19, 120.19, 111.15 (d,  $J = 2.8$  Hz), 106.74, 51.07, 41.10.

**HRMS** (ESI)  $m/z$  calcd for  $\text{C}_{30}\text{H}_{26}\text{ClN}_2\text{O}_2\text{S}$   $[\text{M}+\text{H}]^+$ : 513.1324, found: 513.1396.

**(E)-N-(2-(4-Bromophenyl)-1-(2-phenyl-1H-indol-3-yl)vinyl)-4-methyl-N-phenylbenzenesulfonamide (3o).**

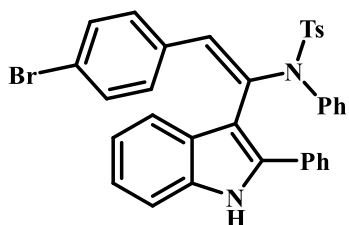

Yellow solid, 38.2mg, 63% yield; m. p. 205-206 °C.  $^1\text{H NMR}$  (600 MHz, Chloroform-*d*)  $\delta$  8.03 (s, 1H), 7.61 (d,  $J = 8.0$  Hz, 1H), 7.44 (m, 2H), 7.25 (m, 4H), 7.14 (m, 5H), 7.05 (m, 4H), 6.98 (dd,  $J = 8.5, 6.9$  Hz, 2H), 6.89 (m, 2H), 6.78 (m, 3H), 2.40 (s, 3H).  $^{13}\text{C NMR}$  (151 MHz, Chloroform-*d*)  $\delta$  143.42, 138.67, 137.98, 137.35, 135.58,

135.28, 134.54, 131.82, 131.02, 130.04, 129.86, 129.29, 128.45, 128.24, 128.15, 128.07, 128.03, 127.92, 127.71, 124.56, 122.64, 120.74, 120.46, 120.27, 110.64, 108.11, 21.55.

**HRMS** (ESI)  $m/z$  calcd for  $\text{C}_{35}\text{H}_{28}\text{BrN}_2\text{O}_2\text{S}$   $[\text{M}+\text{H}]^+$ : 619.0958, found: 619.1028.

**(E)-4-Methyl-N-phenyl-N-(1-(2-phenyl-1H-indol-3-yl)-2-(p-tolyl)vinyl)benzenesulfonamide (3p).**

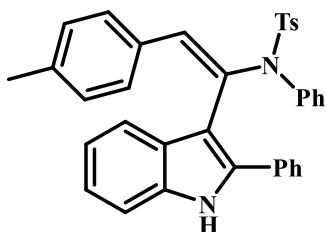

Yellow solid, 36.7mg, 66% yield; m. p. 216-217 °C.  $^1\text{H NMR}$  (600 MHz, Chloroform-*d*)  $\delta$  8.07 (d,  $J = 8.6$  Hz, 1H), 7.57 (dd,  $J = 7.9, 1.2$  Hz, 1H), 7.42 (m, 2H), 7.21 (m, 3H), 7.15 (dd,  $J = 9.7, 7.3$  Hz, 4H), 7.09 (m, 1H), 6.99 (m, 2H), 6.90 (m, 6H), 6.83 (m, 2H), 6.79 (d,  $J = 7.9$  Hz, 2H), 2.38 (s, 3H), 2.16 (s, 3H).  $^{13}\text{C NMR}$  (151 MHz, Chloroform-*d*)  $\delta$

143.44, 139.04, 138.51, 137.17, 136.72, 135.87, 133.44, 132.86, 132.27, 130.31, 129.48, 129.01, 128.58 (d,  $J = 2.5$  Hz), 128.52, 128.33, 128.30, 128.18, 128.06, 127.92, 127.00, 122.66, 122.00, 120.88, 120.69, 110.80, 109.13, 21.79, 21.37. **HRMS** (ESI)  $m/z$  calcd for  $\text{C}_{36}\text{H}_{31}\text{N}_2\text{O}_2\text{S}$   $[\text{M}+\text{H}]^+$ : 555.2024, found: 555.2095.

**(E)-N-Benzyl-N-(2-(3-methoxyphenyl)-1-(2-phenyl-1H-indol-3-yl)vinyl)methanesulfonamide (3q).** Yellow solid, 44.8mg, 88% yield; m. p. 215-

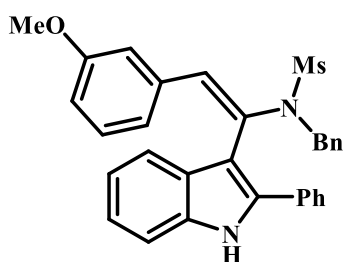

216 °C.  $^1\text{H NMR}$  (600 MHz, Chloroform-*d*)  $\delta$  8.40 (dd,  $J = 6.7, 3.5$  Hz, 1H), 7.39 (m, 2H), 7.22 (m, 9H), 7.10 (m, 2H), 7.05 (m, 1H), 6.87 (t,  $J = 8.0$  Hz, 1H), 6.84 (s, 1H), 6.53 (dd,  $J = 8.0, 2.7$  Hz, 2H), 6.40 (t,  $J = 2.1$  Hz, 1H), 4.45 (m, 2H), 3.29 (s, 3H), 2.64 (s, 3H).  $^{13}\text{C NMR}$  (151 MHz, Chloroform-*d*)  $\delta$  156.77, 135.06, 134.86, 134.84, 133.46, 129.70, 128.95, 127.86, 126.49, 126.44, 126.05, 126.00, 125.80, 125.73, 125.62, 124.99, 120.70, 119.15, 118.69, 118.09, 111.15, 110.38, 108.58, 105.17, 52.29, 48.69, 38.44. **HRMS** (ESI)  $m/z$  calcd for  $\text{C}_{31}\text{H}_{29}\text{N}_2\text{O}_3\text{S}$   $[\text{M}+\text{H}]^+$ : 509.1815, found: 509.1886.

**2-Phenyl-1H-indole (4).** White solid, 36.7 mg, 95% yield; m. p. 190-191 °C.  $^1\text{H NMR}$

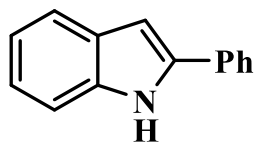

(600 MHz, Chloroform-*d*)  $\delta$  8.28 (s, 1H), 7.63 (m, 3H), 7.42 (m, 2H), 7.38 (dq,  $J = 8.1, 1.0$  Hz, 1H), 7.31 (m, 1H), 7.19 (ddd,  $J = 8.2, 7.1, 1.2$  Hz, 1H), 7.12 (ddd,  $J = 8.0, 7.0, 1.1$  Hz, 1H), 6.82 (dd,  $J = 2.2, 0.9$  Hz, 1H).  $^{13}\text{C NMR}$  (151 MHz, Chloroform-*d*)  $\delta$  137.87, 136.80, 132.36, 129.25, 129.01, 127.70, 125.15, 122.34, 120.66, 120.26, 110.89, 99.97. **HRMS** (ESI)  $m/z$  calcd for  $\text{C}_{14}\text{H}_{12}\text{N}$   $[\text{M}+\text{H}]^+$ : 194.0964, found: 194.1007.

## 6. Single Crystal X-ray Structure Determinations of Compounds

Single crystal X-ray structure determinations of compound 3a (CCDC: 2284506)

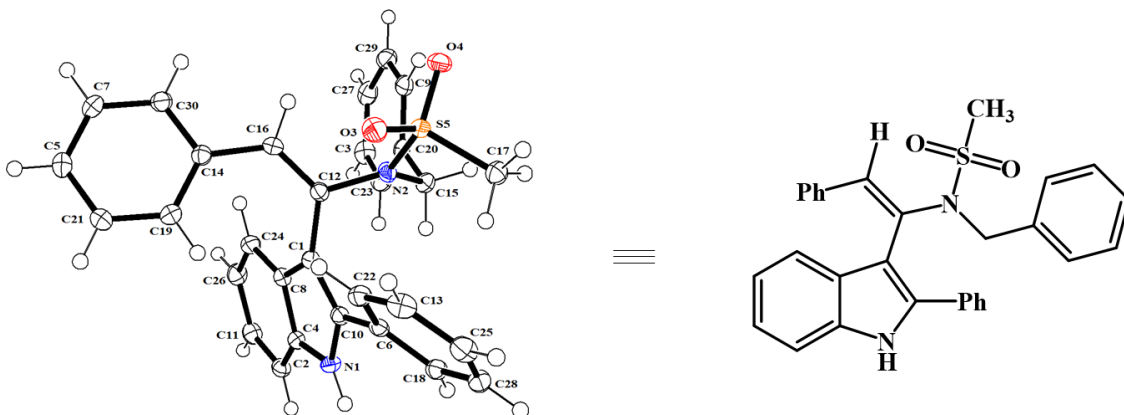

|                        |                                            |                                 |                          |
|------------------------|--------------------------------------------|---------------------------------|--------------------------|
| Bond precision:        | C-C = 0.0019 Å                             | Wavelength=1.54184              |                          |
| Cell:                  | a=10.6510(1)<br>alpha=90                   | b=14.5991(1)<br>beta=109.300(1) | c=16.0583(2)<br>gamma=90 |
| Temperature:           | 100 K                                      |                                 |                          |
|                        | Calculated                                 |                                 | Reported                 |
| Volume                 | 2356.66(4)                                 |                                 | 2356.66(4)               |
| Space group            | P 21/n                                     |                                 | P 1 21/n 1               |
| Hall group             | -P 2yn                                     |                                 | -P 2yn                   |
| Moiety formula         | C30 H26 N2 O2 S                            |                                 | C30 H26 N2 O2 S          |
| Sum formula            | C30 H26 N2 O2 S                            |                                 | C30 H26 N2 O2 S          |
| Mr                     | 478.59                                     |                                 | 478.59                   |
| Dx, g cm <sup>-3</sup> | 1.349                                      |                                 | 1.349                    |
| Z                      | 4                                          |                                 | 4                        |
| Mu (mm <sup>-1</sup> ) | 1.466                                      |                                 | 1.466                    |
| F000                   | 1008.0                                     |                                 | 1008.0                   |
| F000'                  | 1012.00                                    |                                 |                          |
| h,k,lmax               | 12,17,19                                   |                                 | 12,17,19                 |
| Nref                   | 4222                                       |                                 | 4203                     |
| Tmin,Tmax              | 0.768,0.814                                |                                 | 0.713,1.000              |
| Tmin'                  | 0.746                                      |                                 |                          |
| Correction method=     | # Reported T Limits: Tmin=0.713 Tmax=1.000 |                                 |                          |
| AbsCorr =              | MULTI-SCAN                                 |                                 |                          |
| Data completeness=     | 0.995                                      | Theta(max)=                     | 67.076                   |
| R(reflections)=        | 0.0312(3989)                               |                                 |                          |
| wR2(reflections)=      |                                            |                                 | 0.0815(4203)             |
| S =                    | 1.044                                      | Npar=                           | 317                      |

## 7. Copies of NMR Spectra

$^1\text{H}$  NMR,  $^{13}\text{C}$  NMR and  $^{19}\text{F}$  NMR spectra for compounds:

(E)-N-Benzyl-N-(2-phenyl-1-(2-phenyl-1H-indol-3-yl)vinyl)methanesulfonamide (3a)

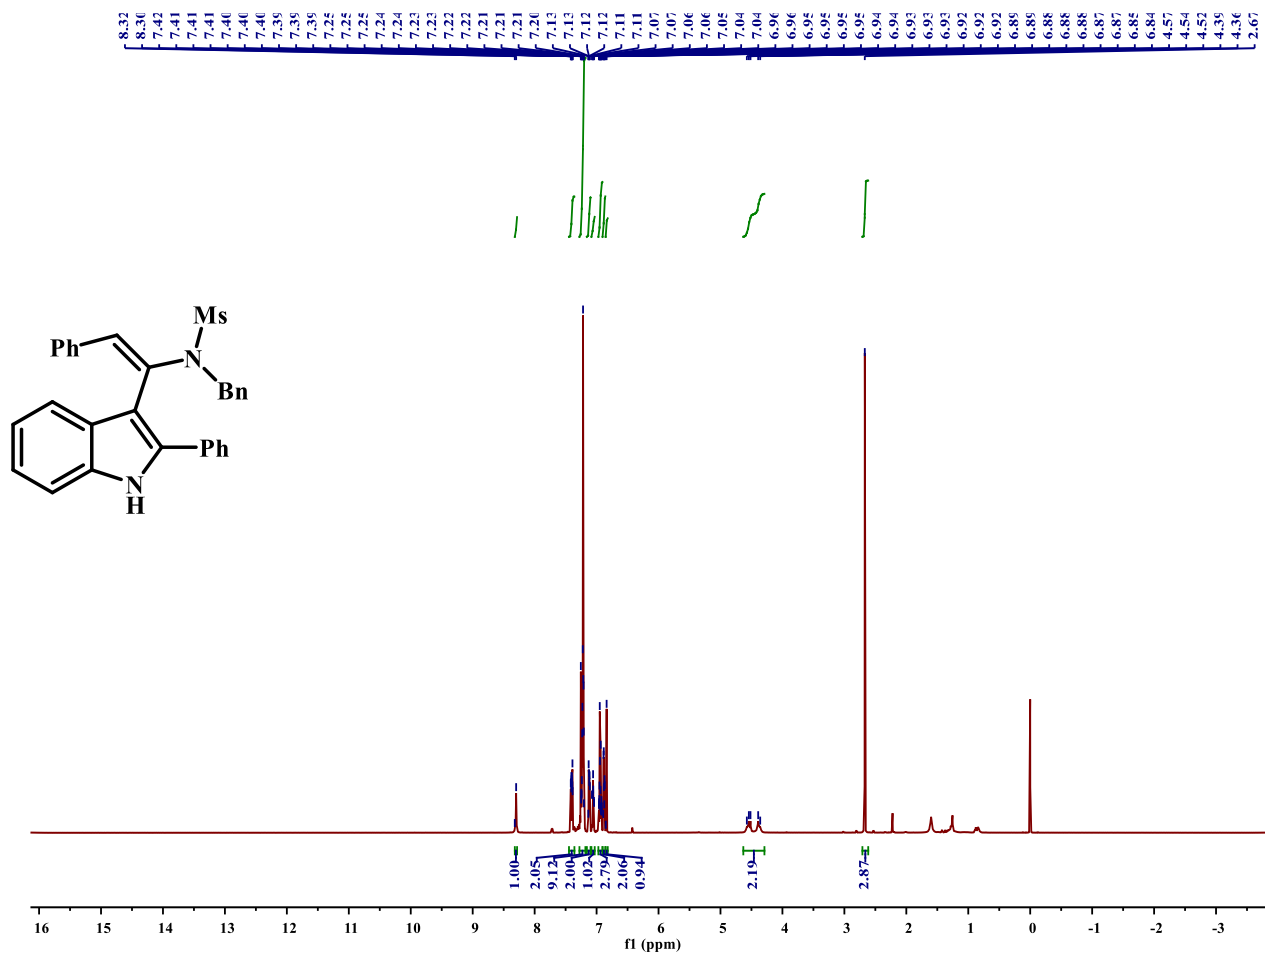

**(E)-N-Benzyl-N-(2-phenyl-1-(2-phenyl-1H-indol-3-yl)vinyl)methanesulfonamide (3a)**

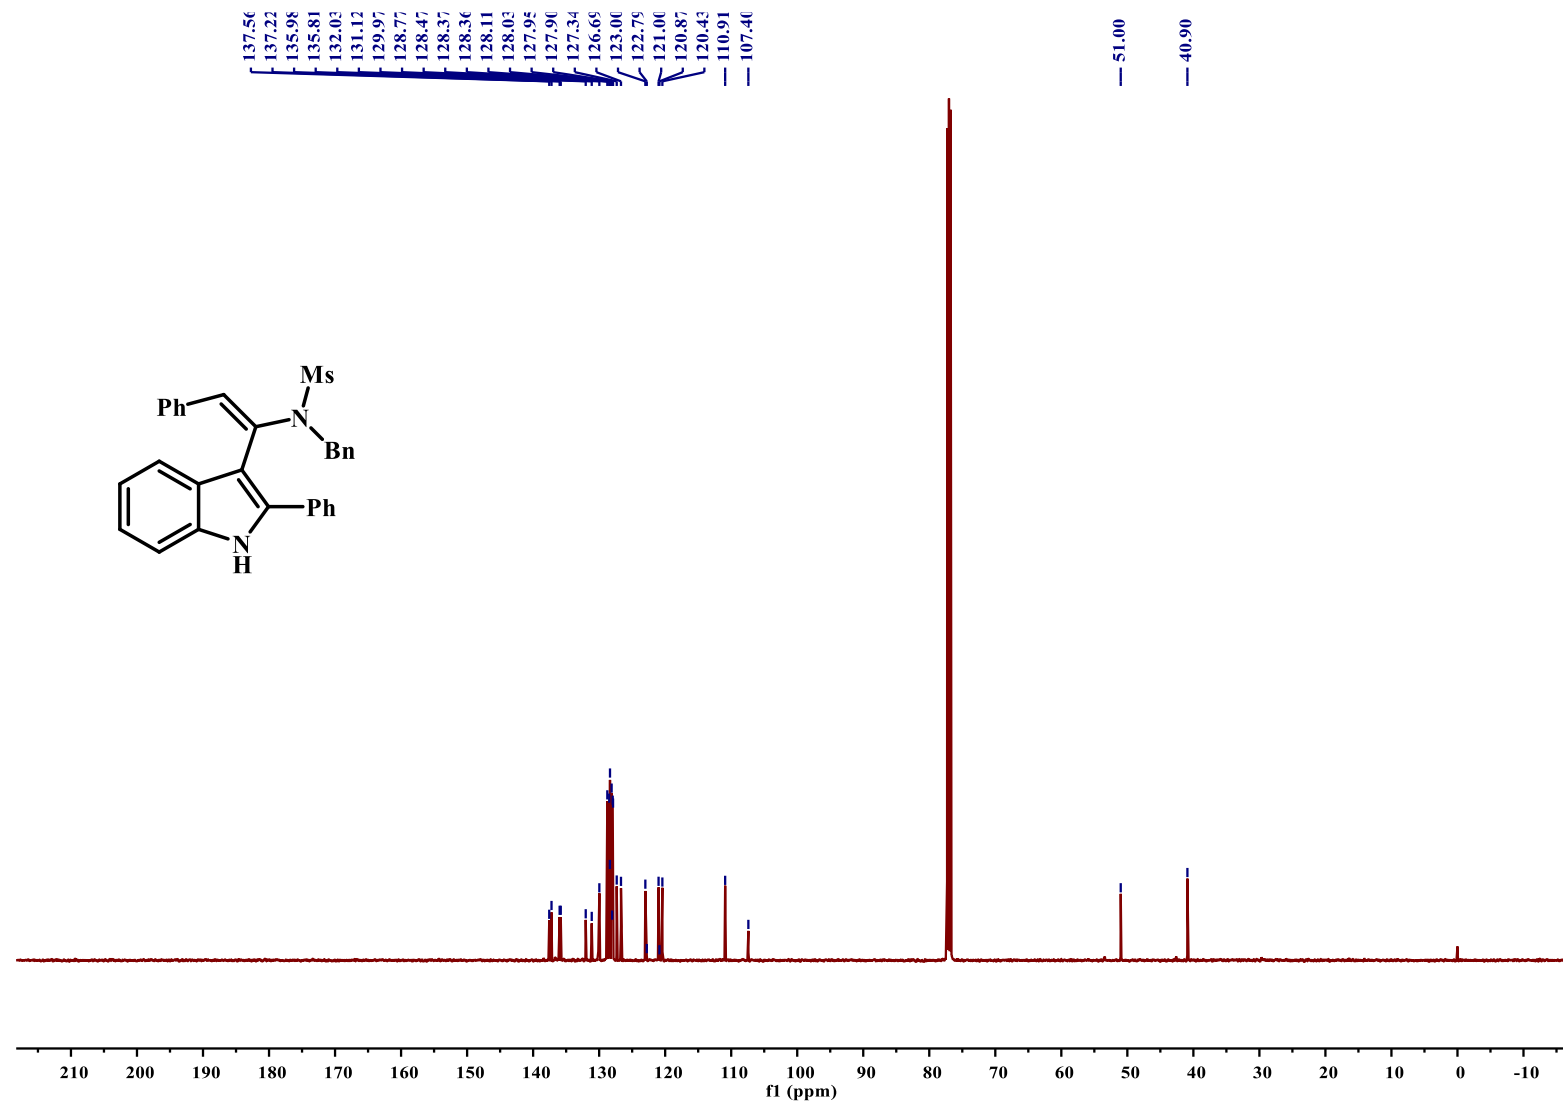

**(E)-N-Benzyl-N-(2-phenyl-1-(2-(p-tolyl)-1H-indol-3-yl)vinyl)methanesulfonamide (3b)**

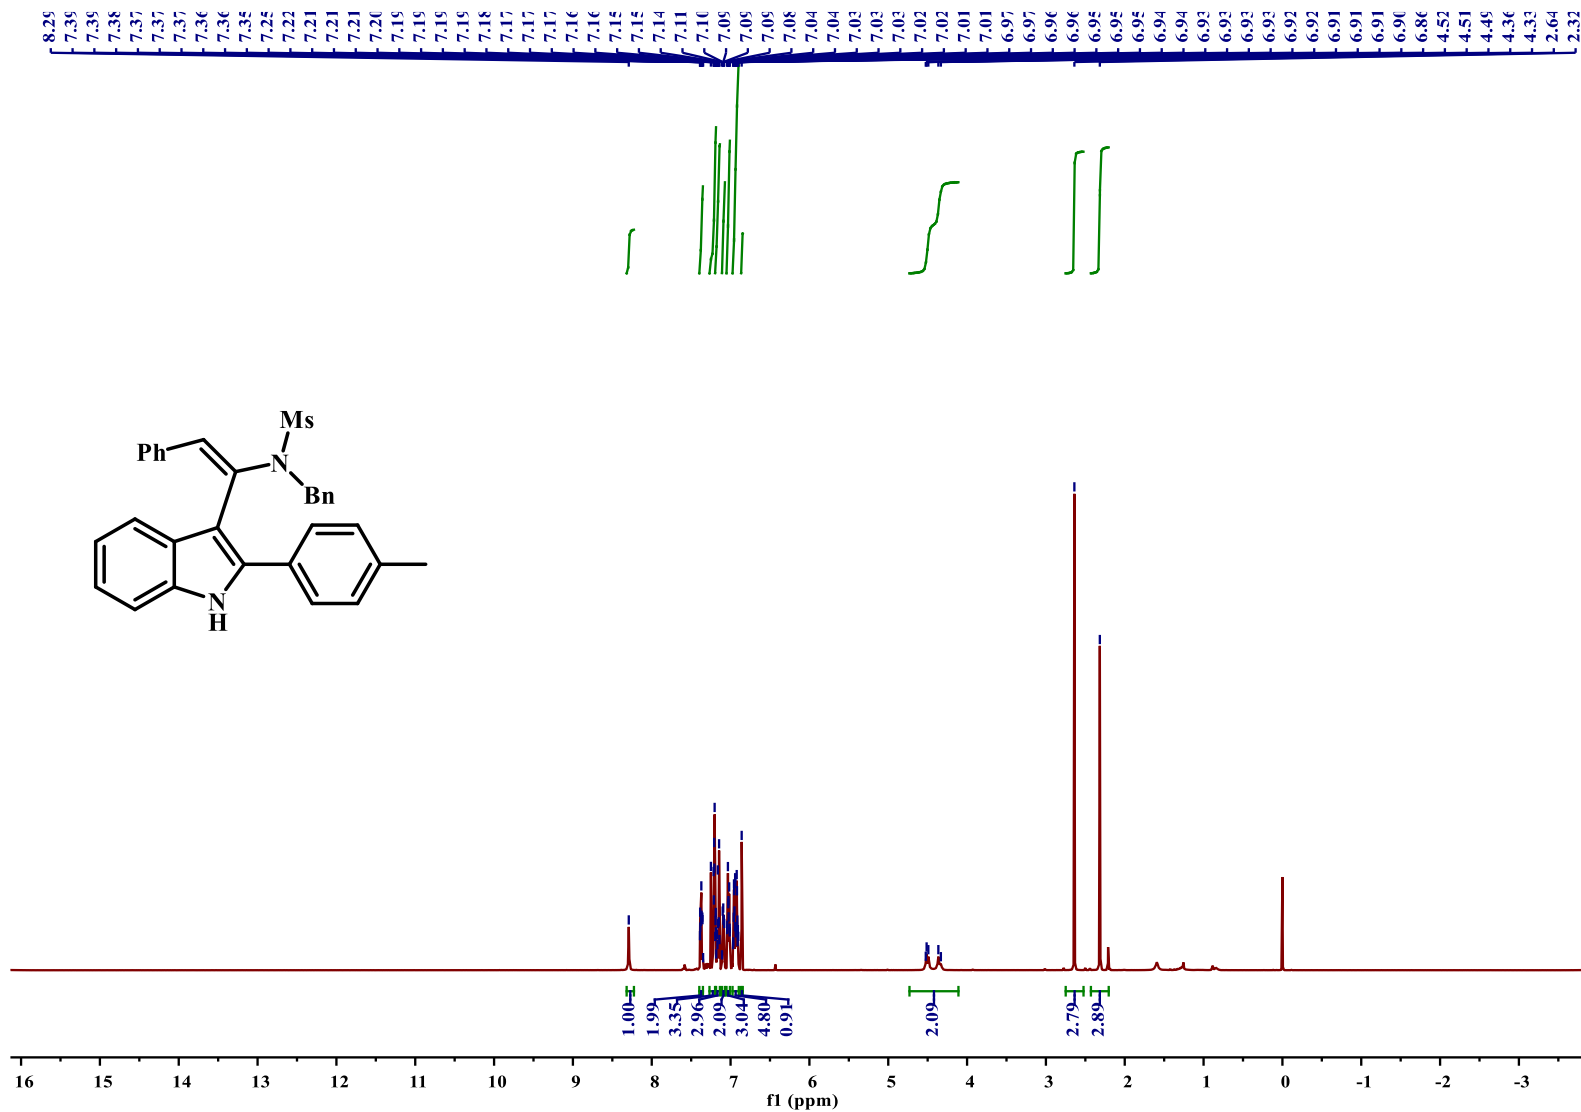

**(E)-N-Benzyl-N-(2-phenyl-1-(2-(p-tolyl)-1H-indol-3-yl)vinyl)methanesulfonamide (3b)**

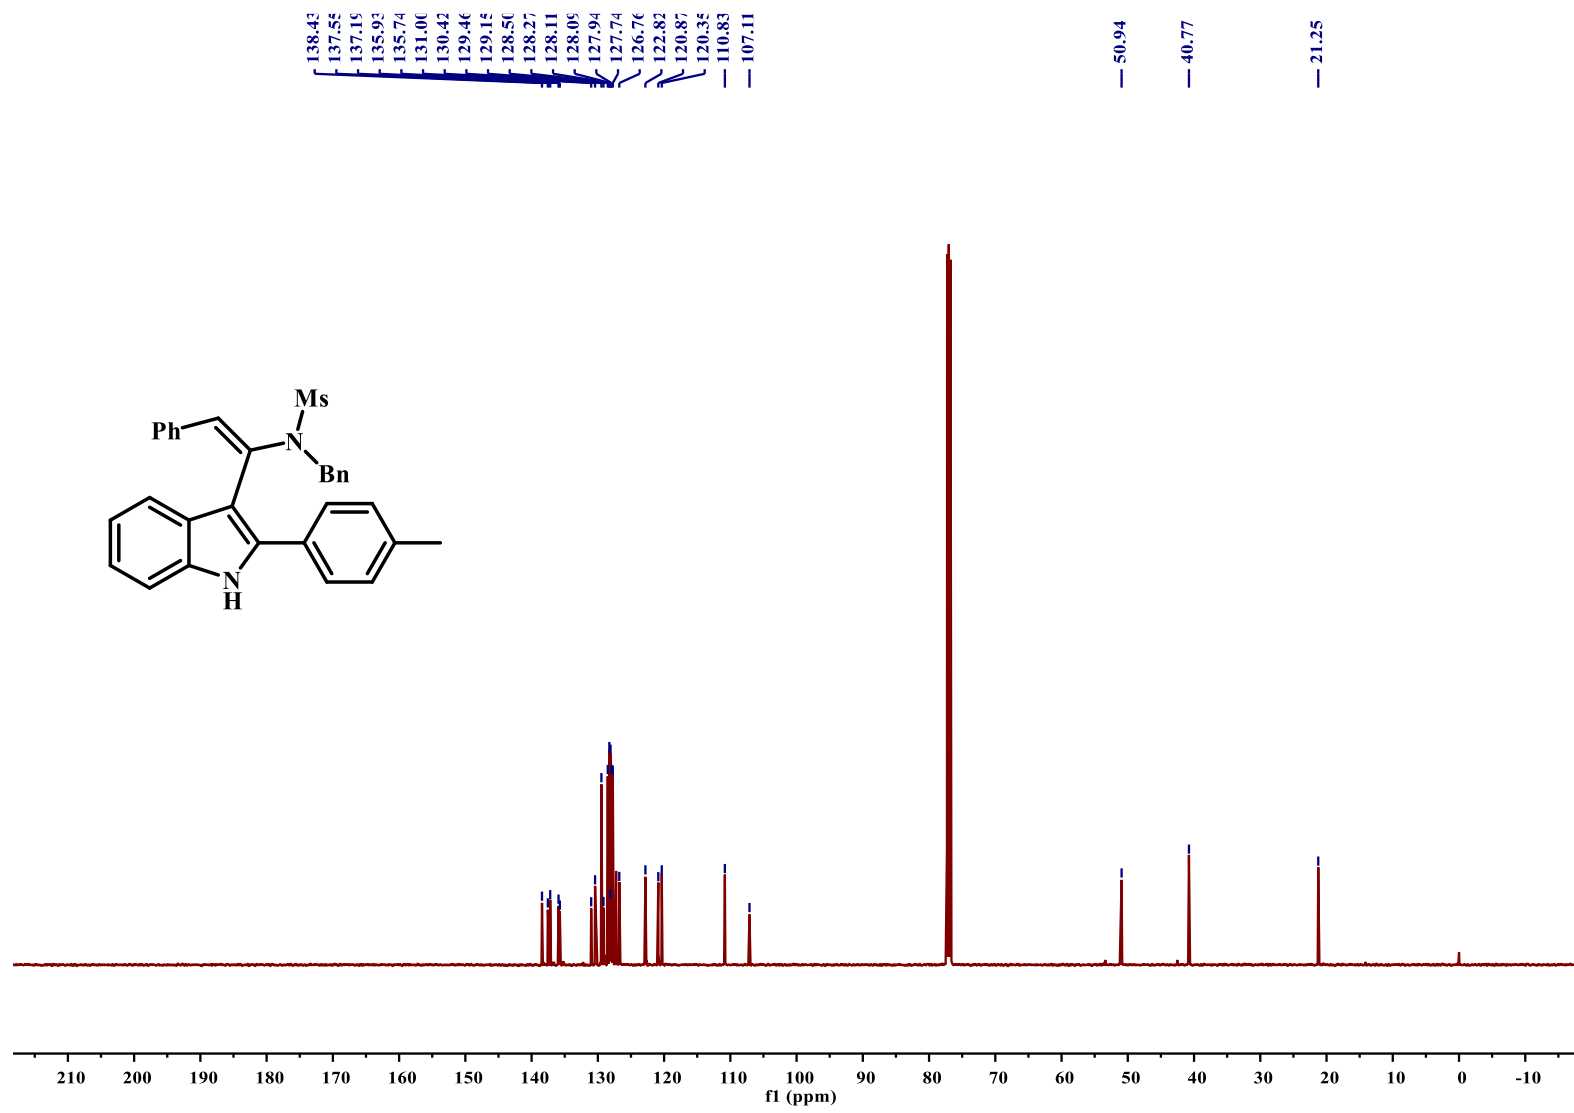

**(E)-N-Benzyl-N-(1-(2-(4-methoxyphenyl)-1H-indol-3-yl)-2-phenylvinyl)methanesulfonamide (3c)**

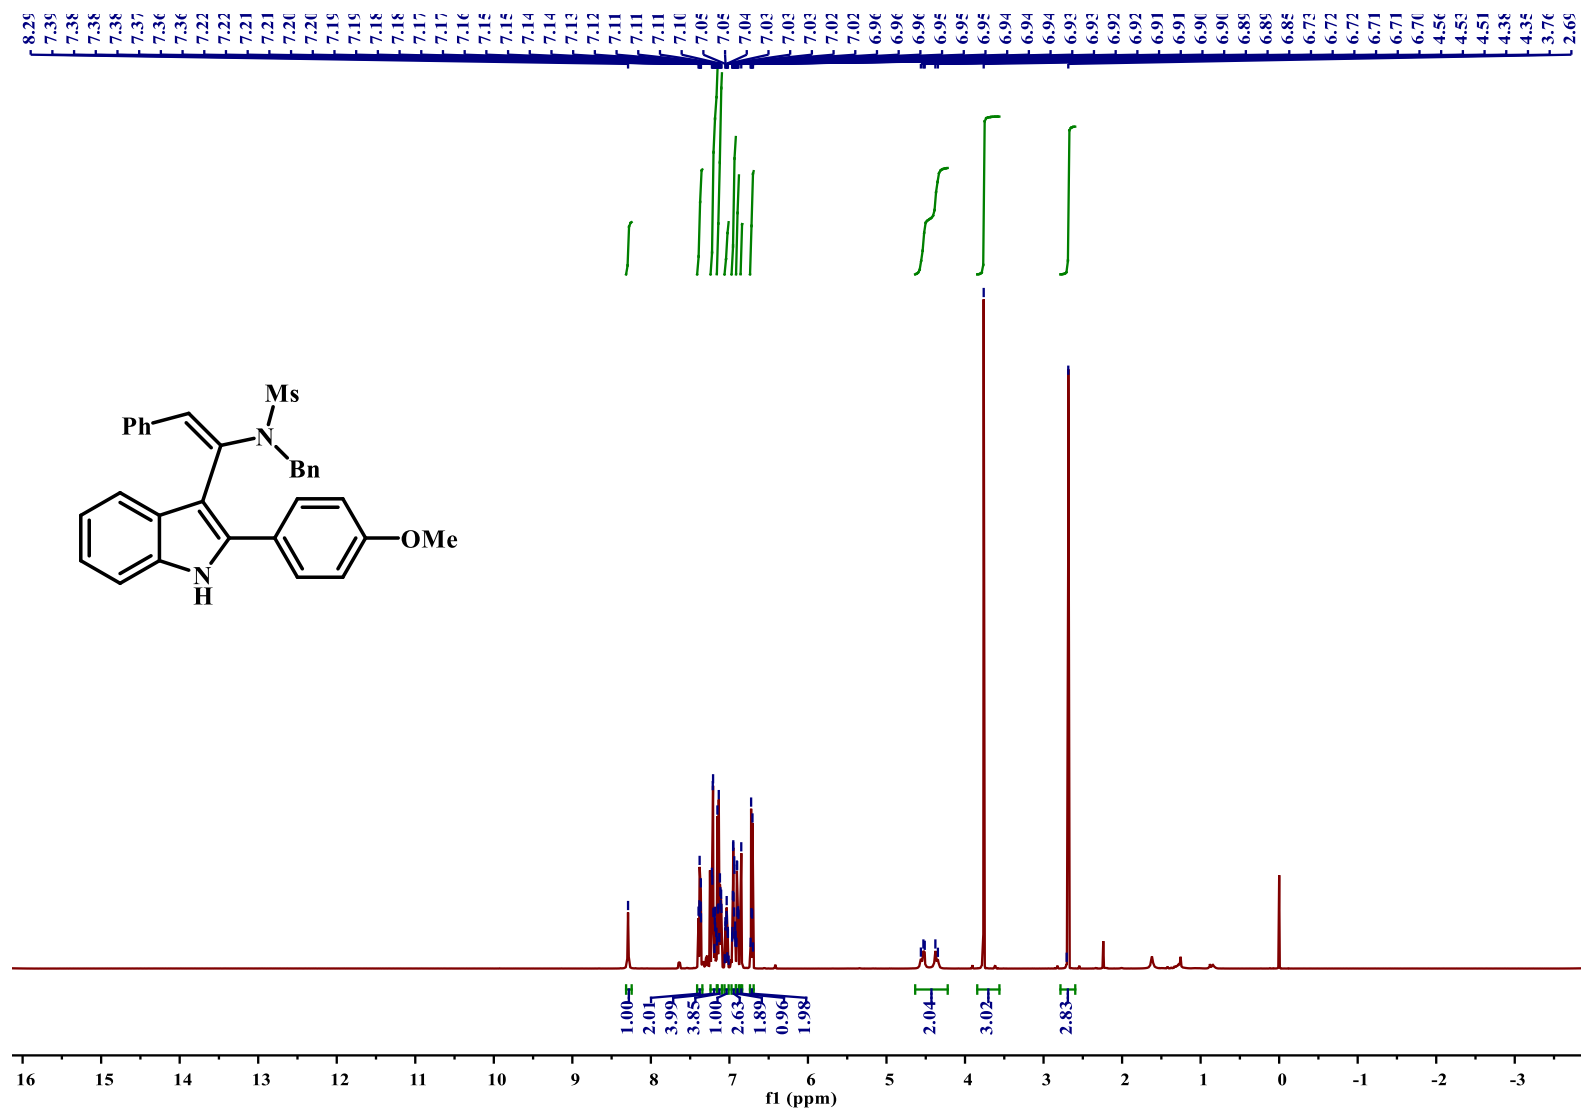



**(E)-N-Benzyl-N-(1-(2-(4-methoxyphenyl)-1H-indol-3-yl)-2-phenylvinyl)methanesulfonamide (3c)**

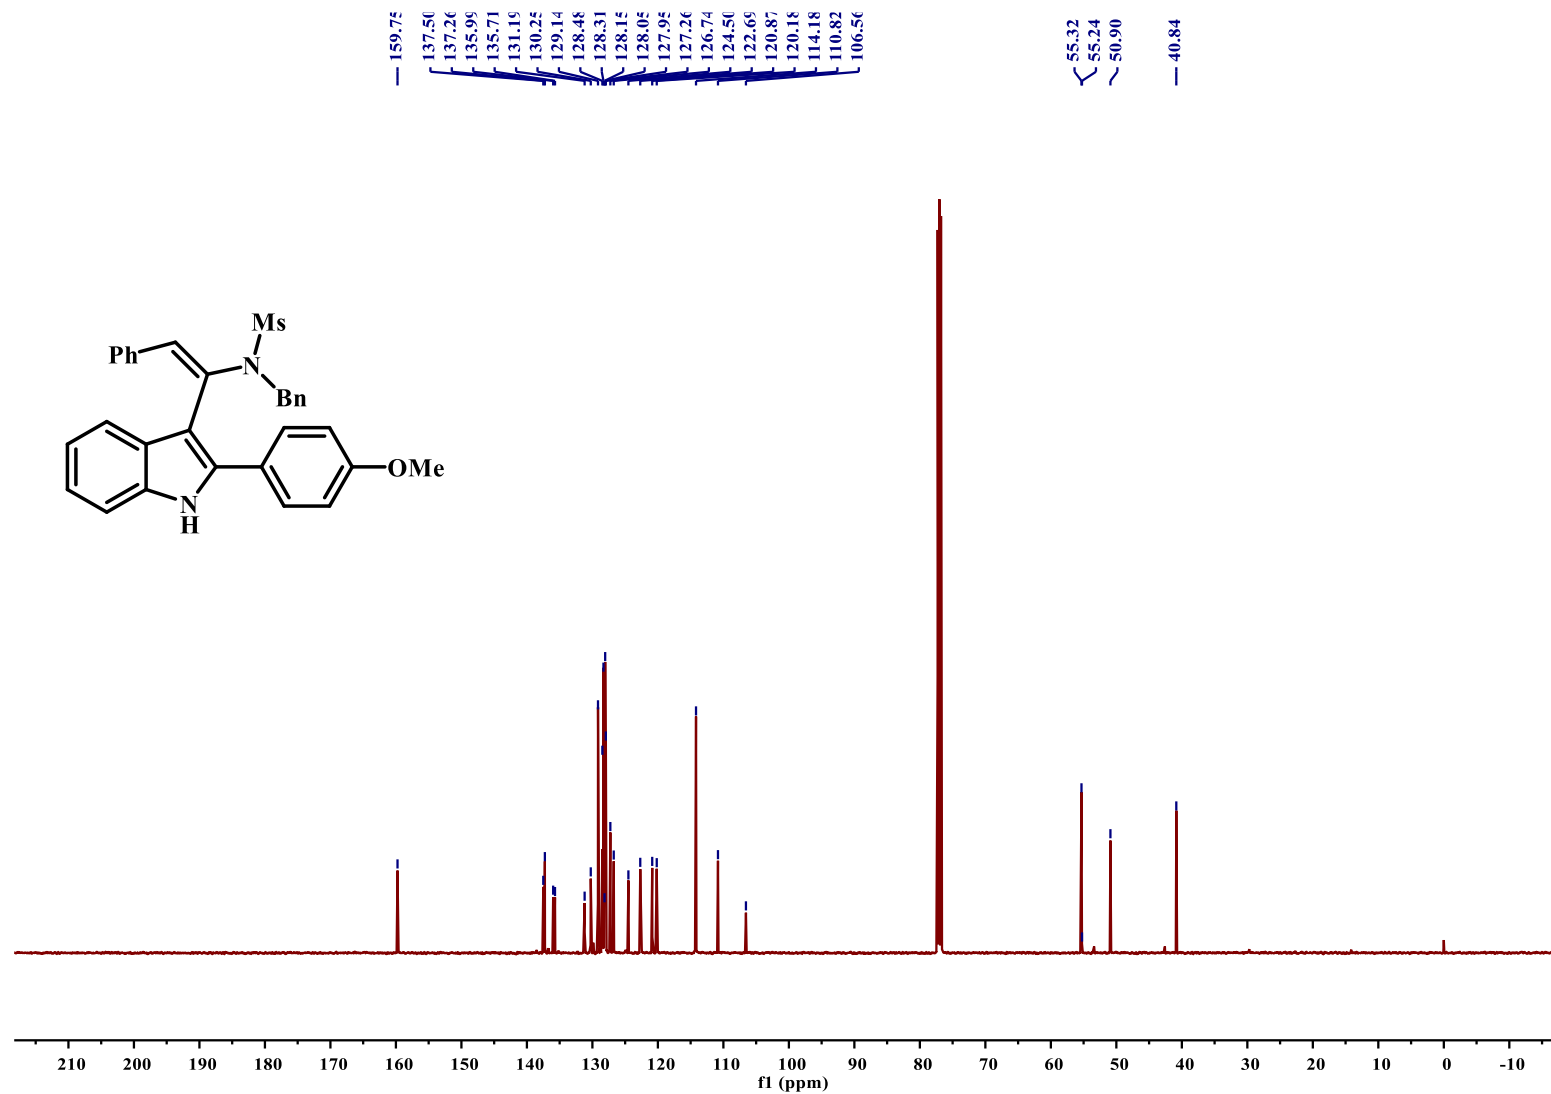

**(E)-N-Benzyl-N-(1-(2-(3-methoxyphenyl)-1H-indol-3-yl)-2-phenylvinyl)methanesulfonamide (3d)**

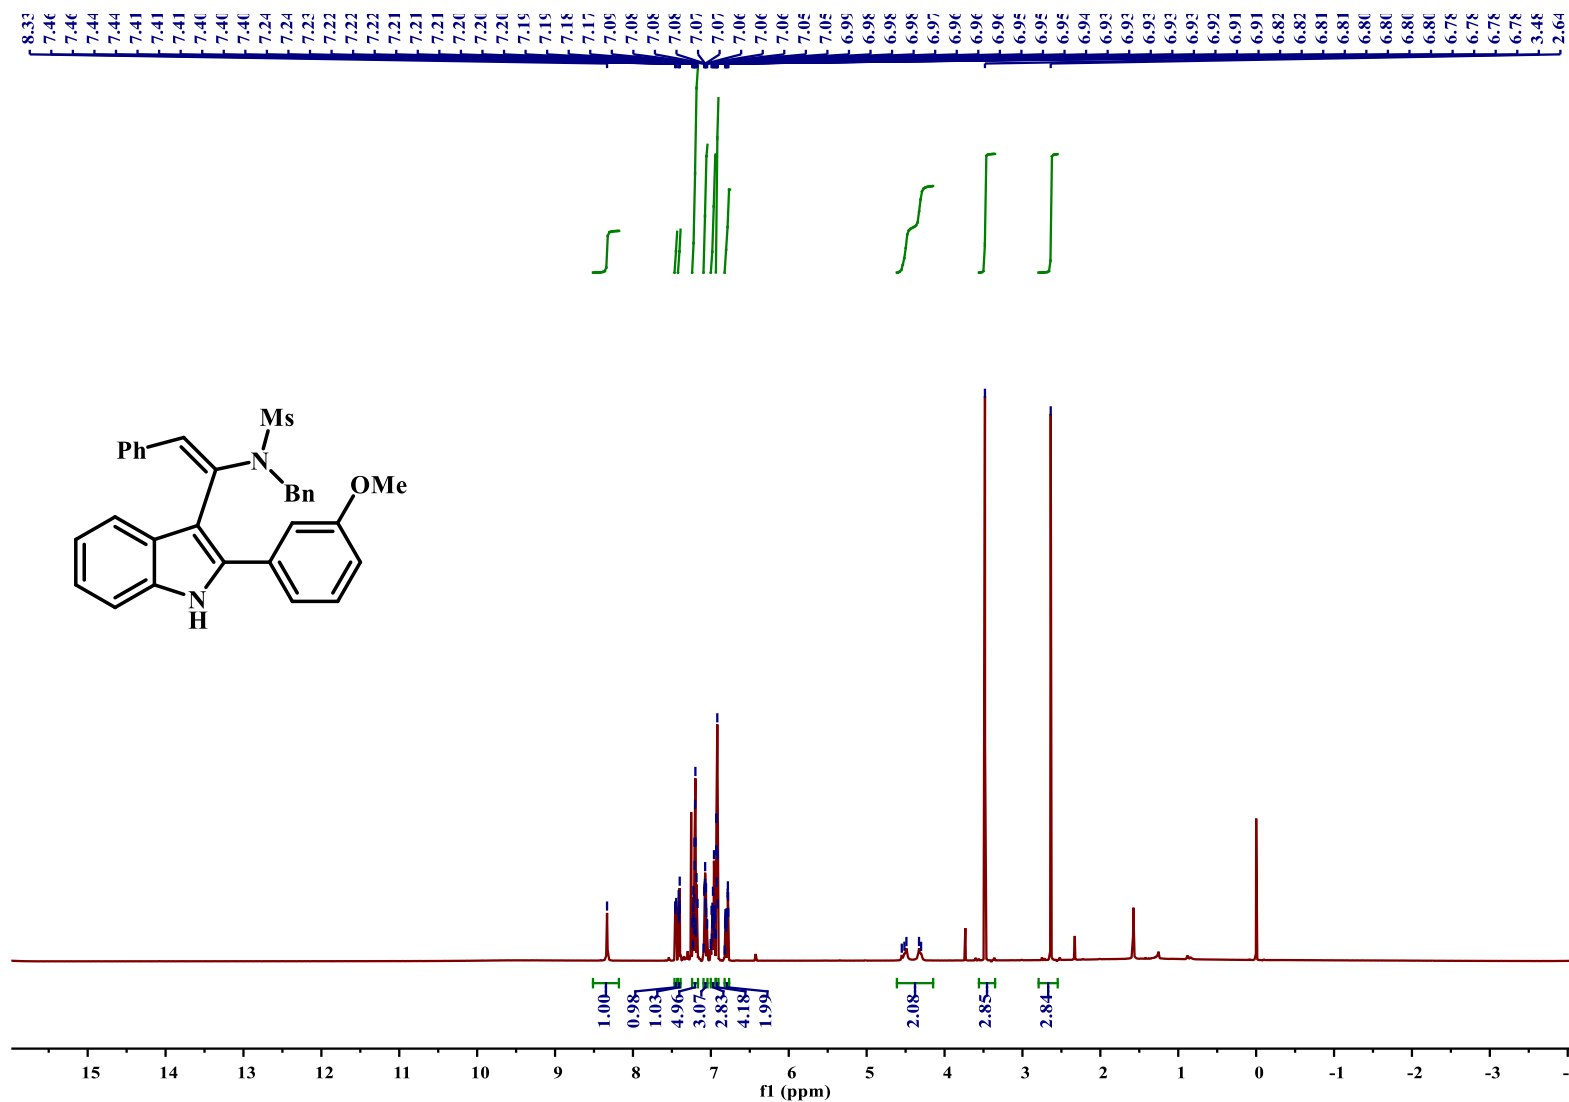

**(E)-N-Benzyl-N-(1-(2-(3-methoxyphenyl)-1H-indol-3-yl)-2-phenylvinyl)methanesulfonamide (3d)**

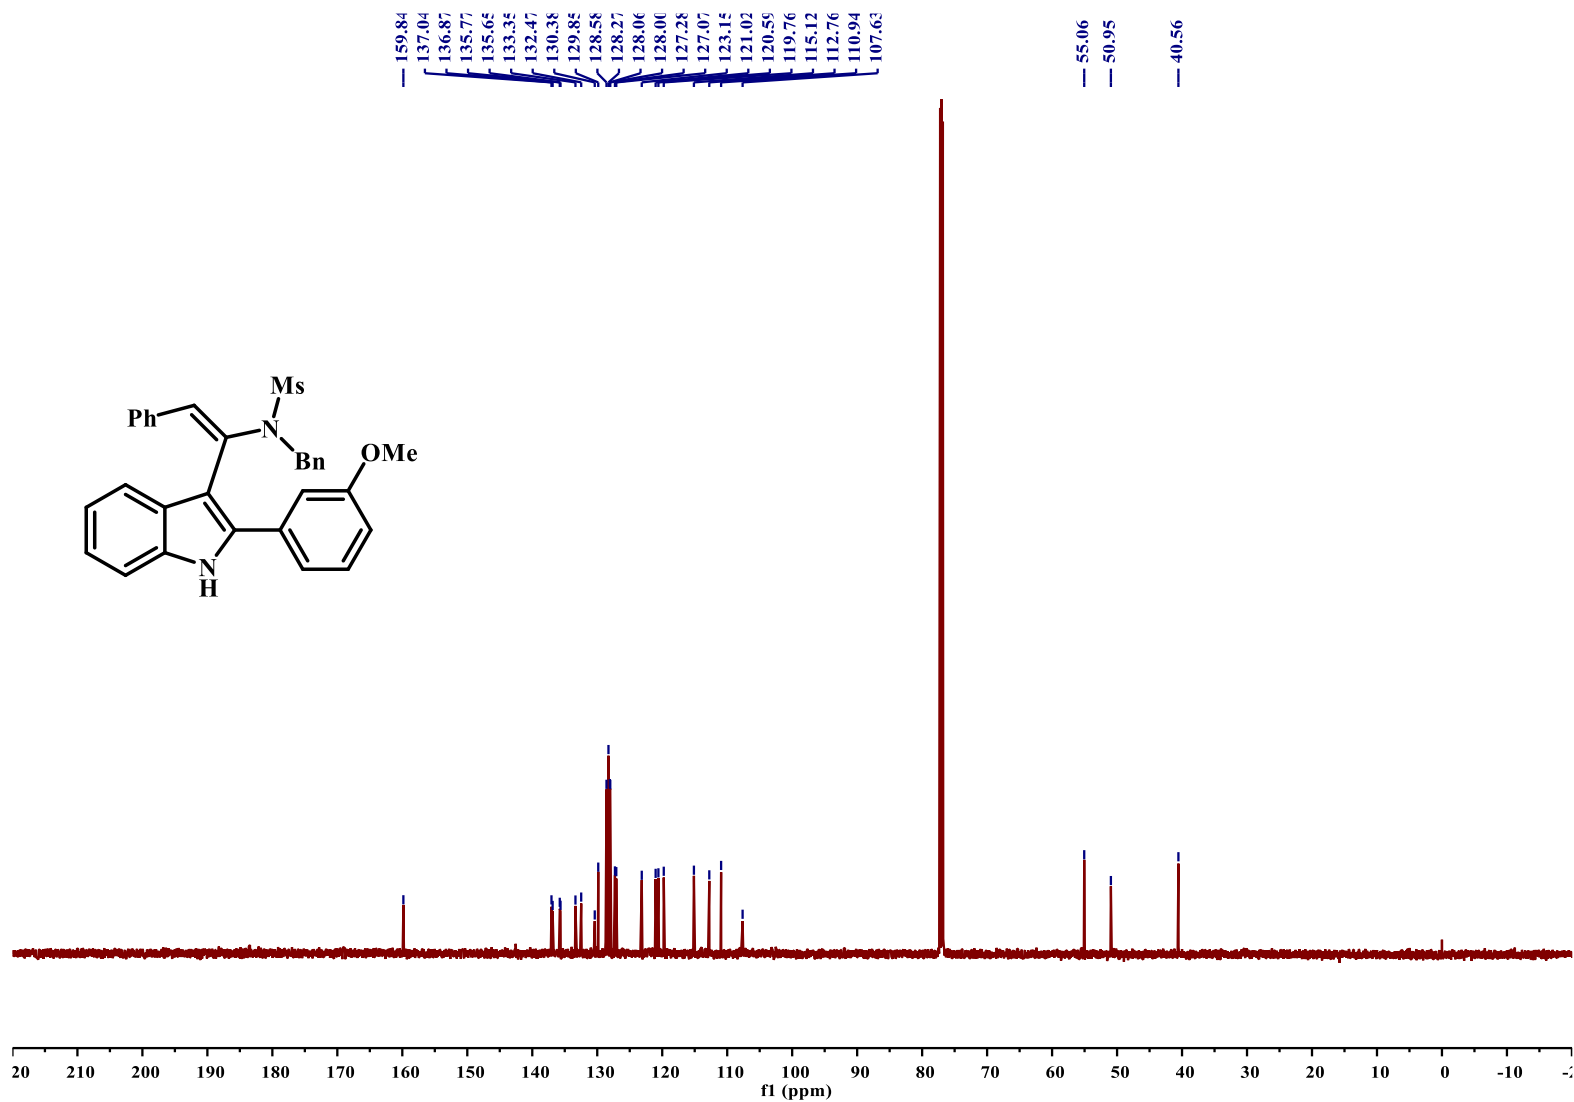

**(E)-N-Benzyl-N-(1-(2-(4-chlorophenyl)-1H-indol-3-yl)-2-phenylvinyl)methanesulfonamide (3e)**

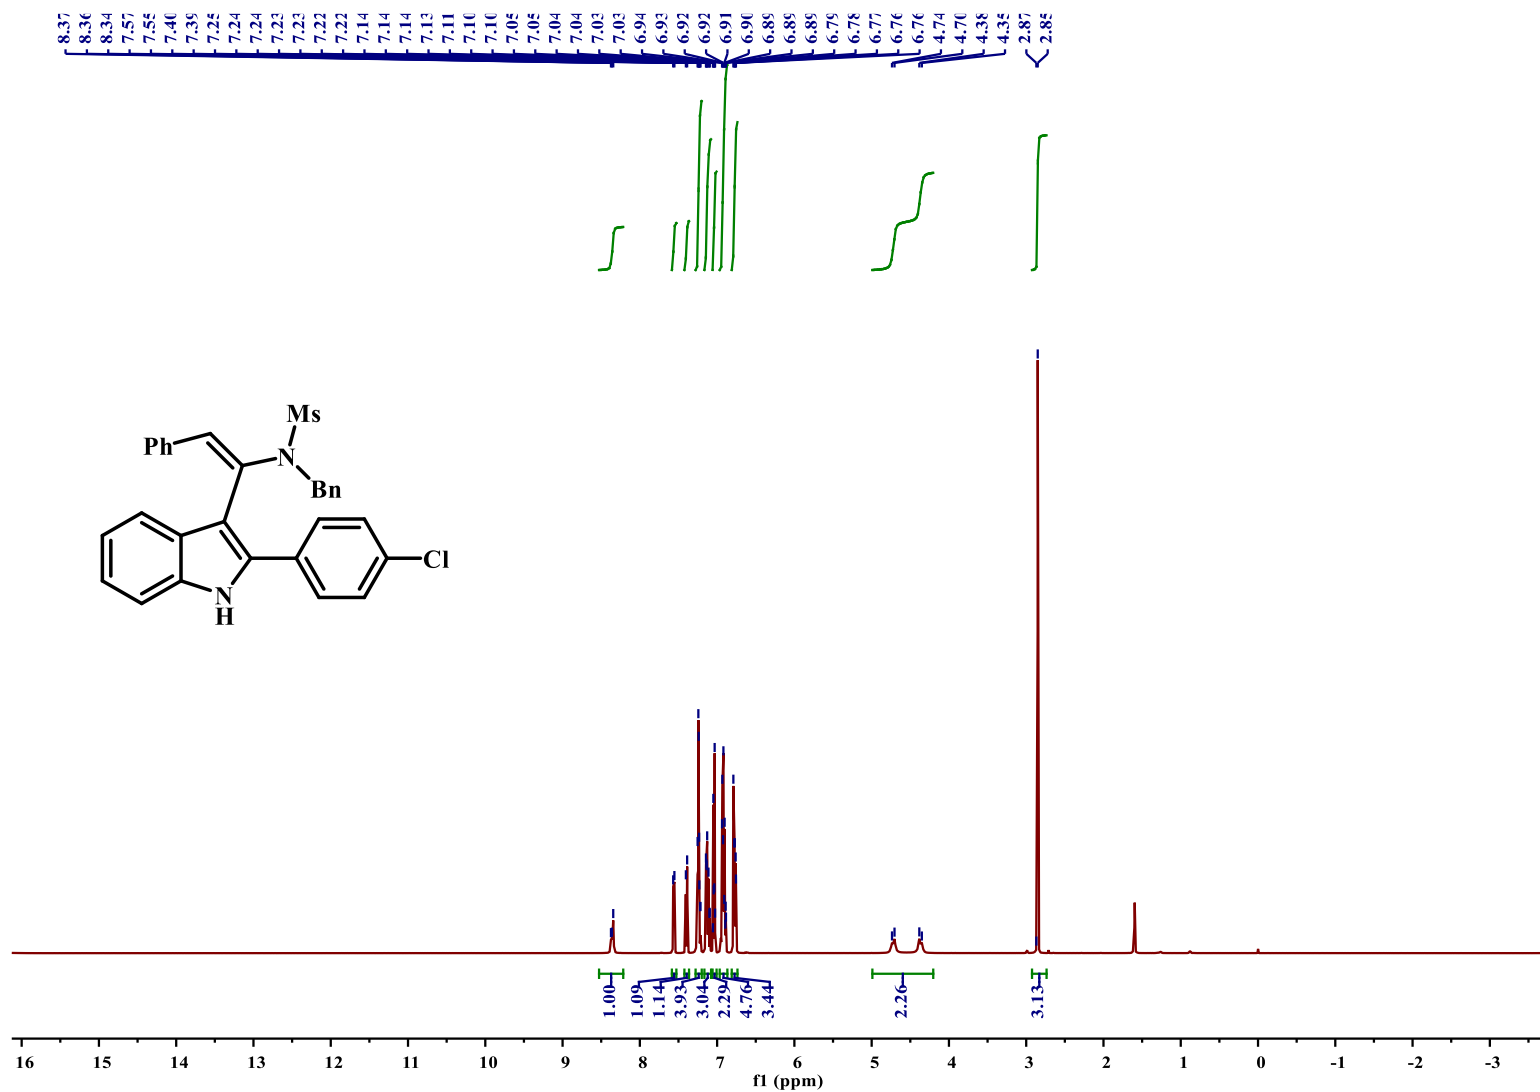

**(E)-N-Benzyl-N-(1-(2-(4-chlorophenyl)-1H-indol-3-yl)-2-phenylvinyl)methanesulfonamide (3e)**

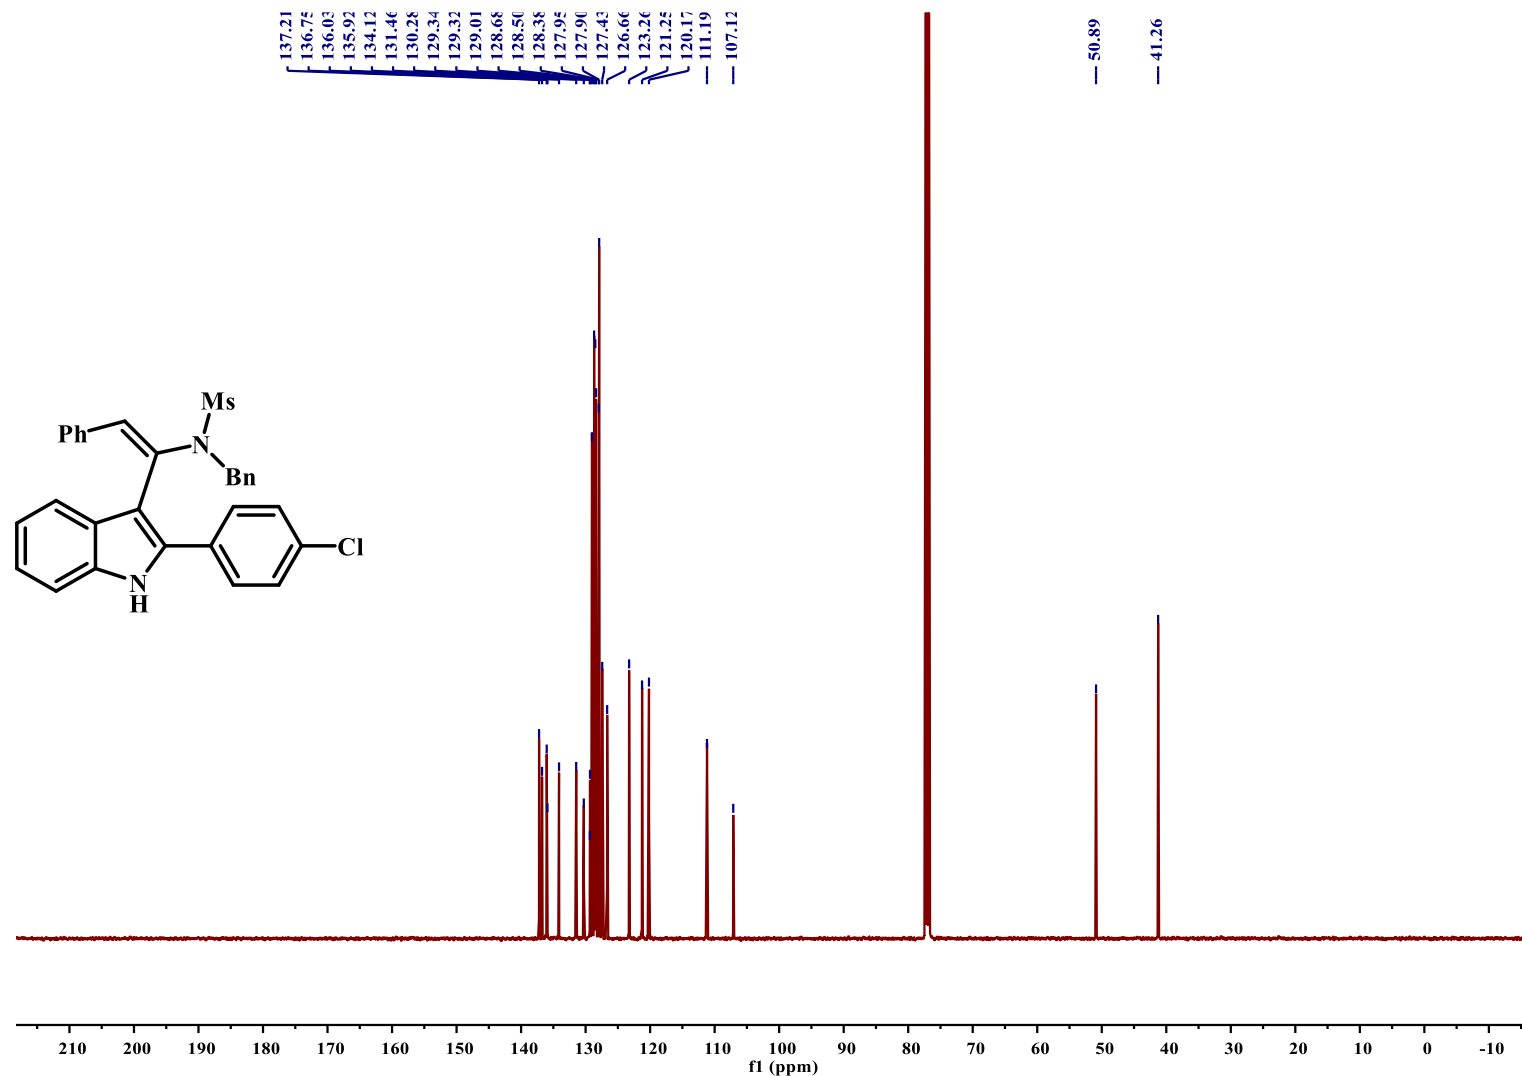

**(E)-N-Benzyl-N-(1-(2-(4-bromophenyl)-1H-indol-3-yl)-2-phenylvinyl)methanesulfonamide (3f)**

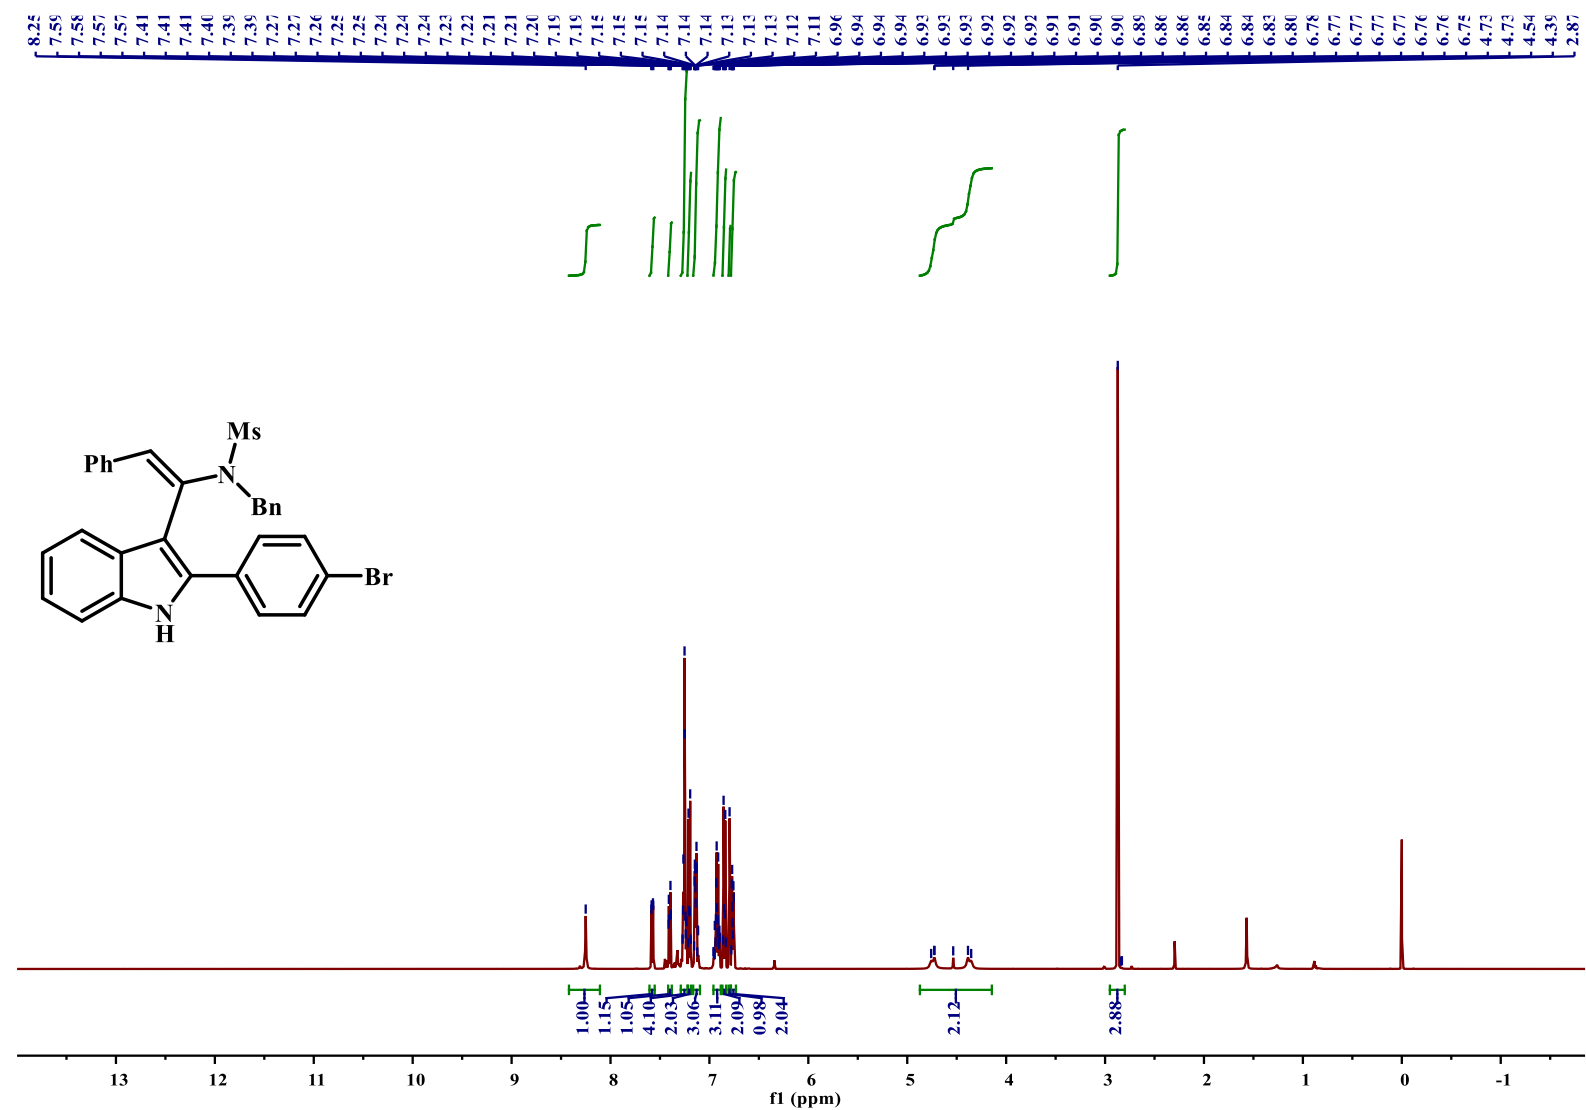

**(E)-N-Benzyl-N-(1-(2-(4-bromophenyl)-1H-indol-3-yl)-2-phenylvinyl)methanesulfonamide (3f)**

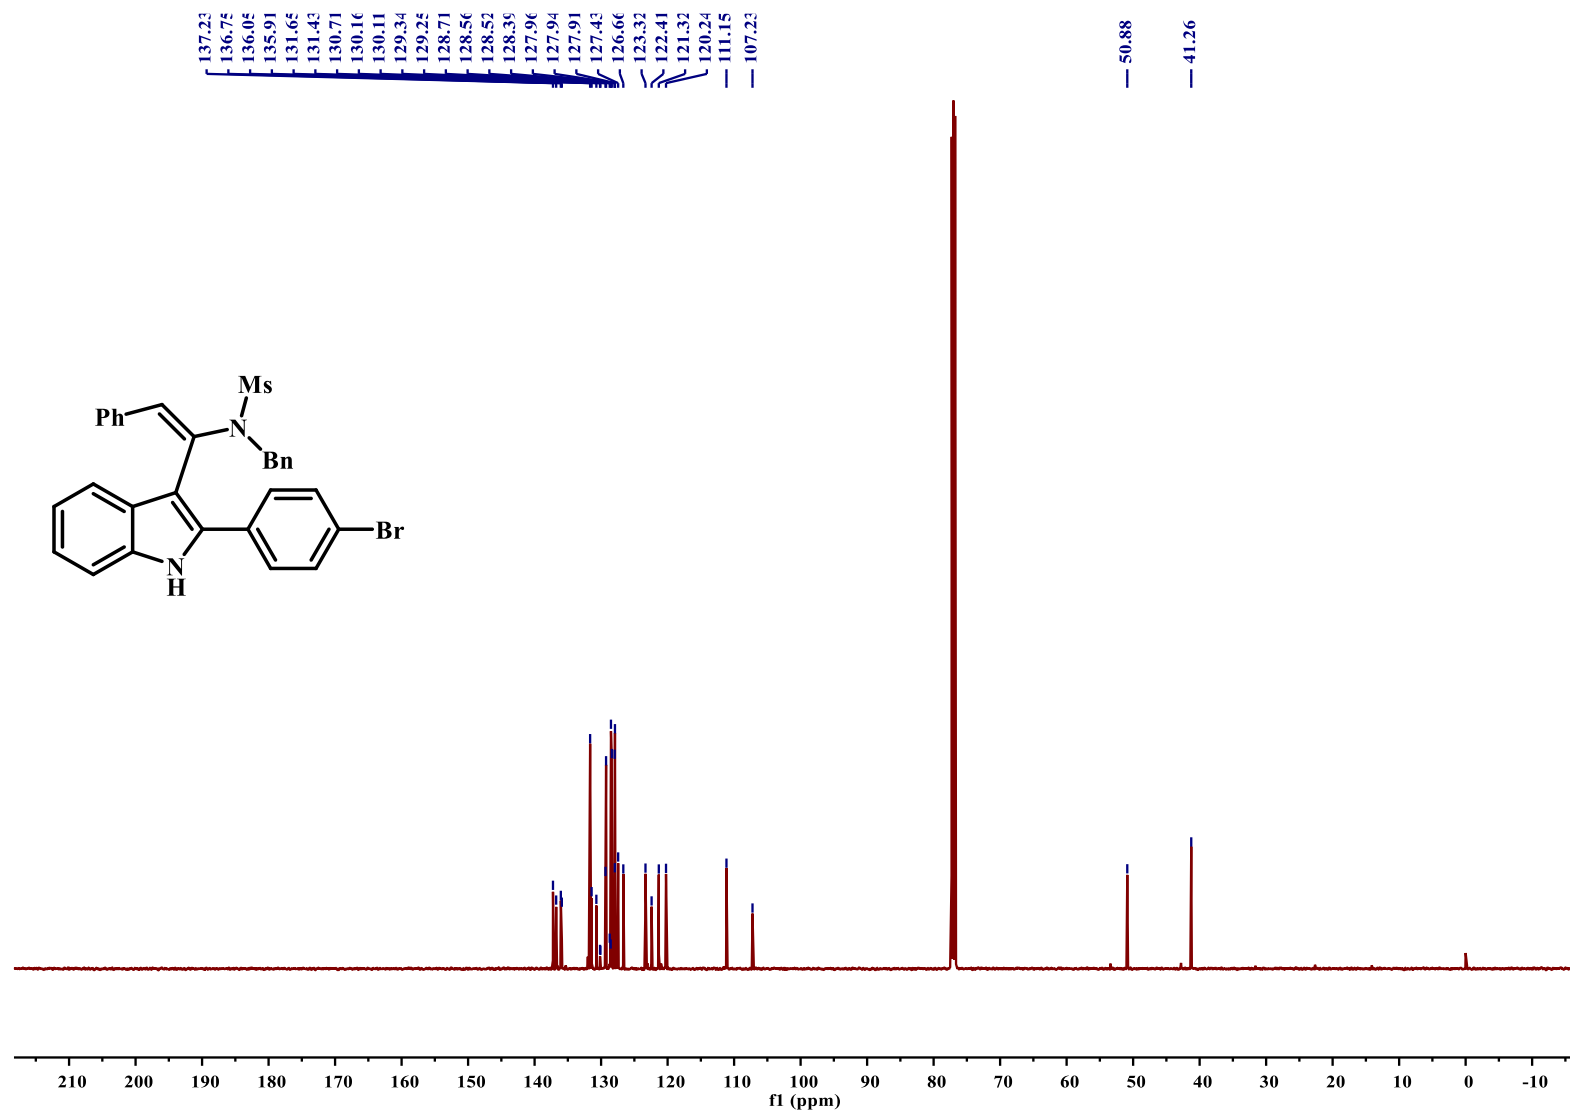

**(E)-N-Benzyl-N-(1-(2-(4-fluorophenyl)-1H-indol-3-yl)-2-phenylvinyl)methanesulfonamide (3g)**

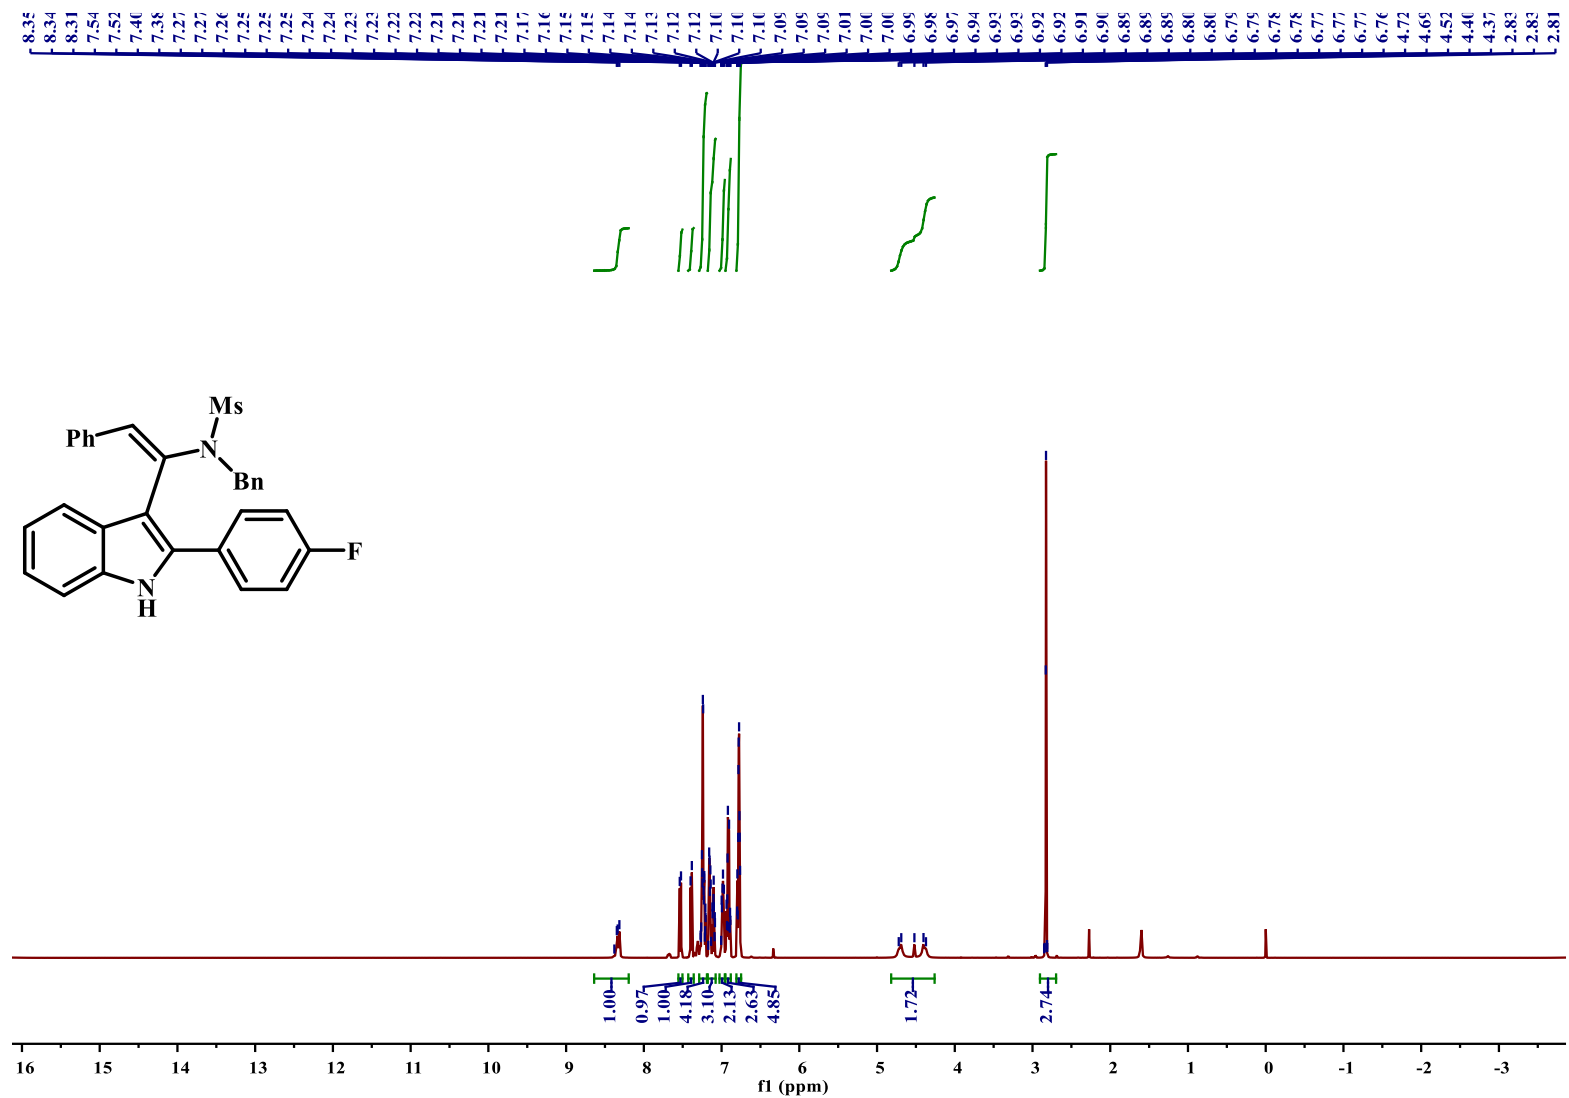



**(E)-N-Benzyl-N-(1-(2-(4-fluorophenyl)-1H-indol-3-yl)-2-phenylvinyl)methanesulfonamide (3g)**

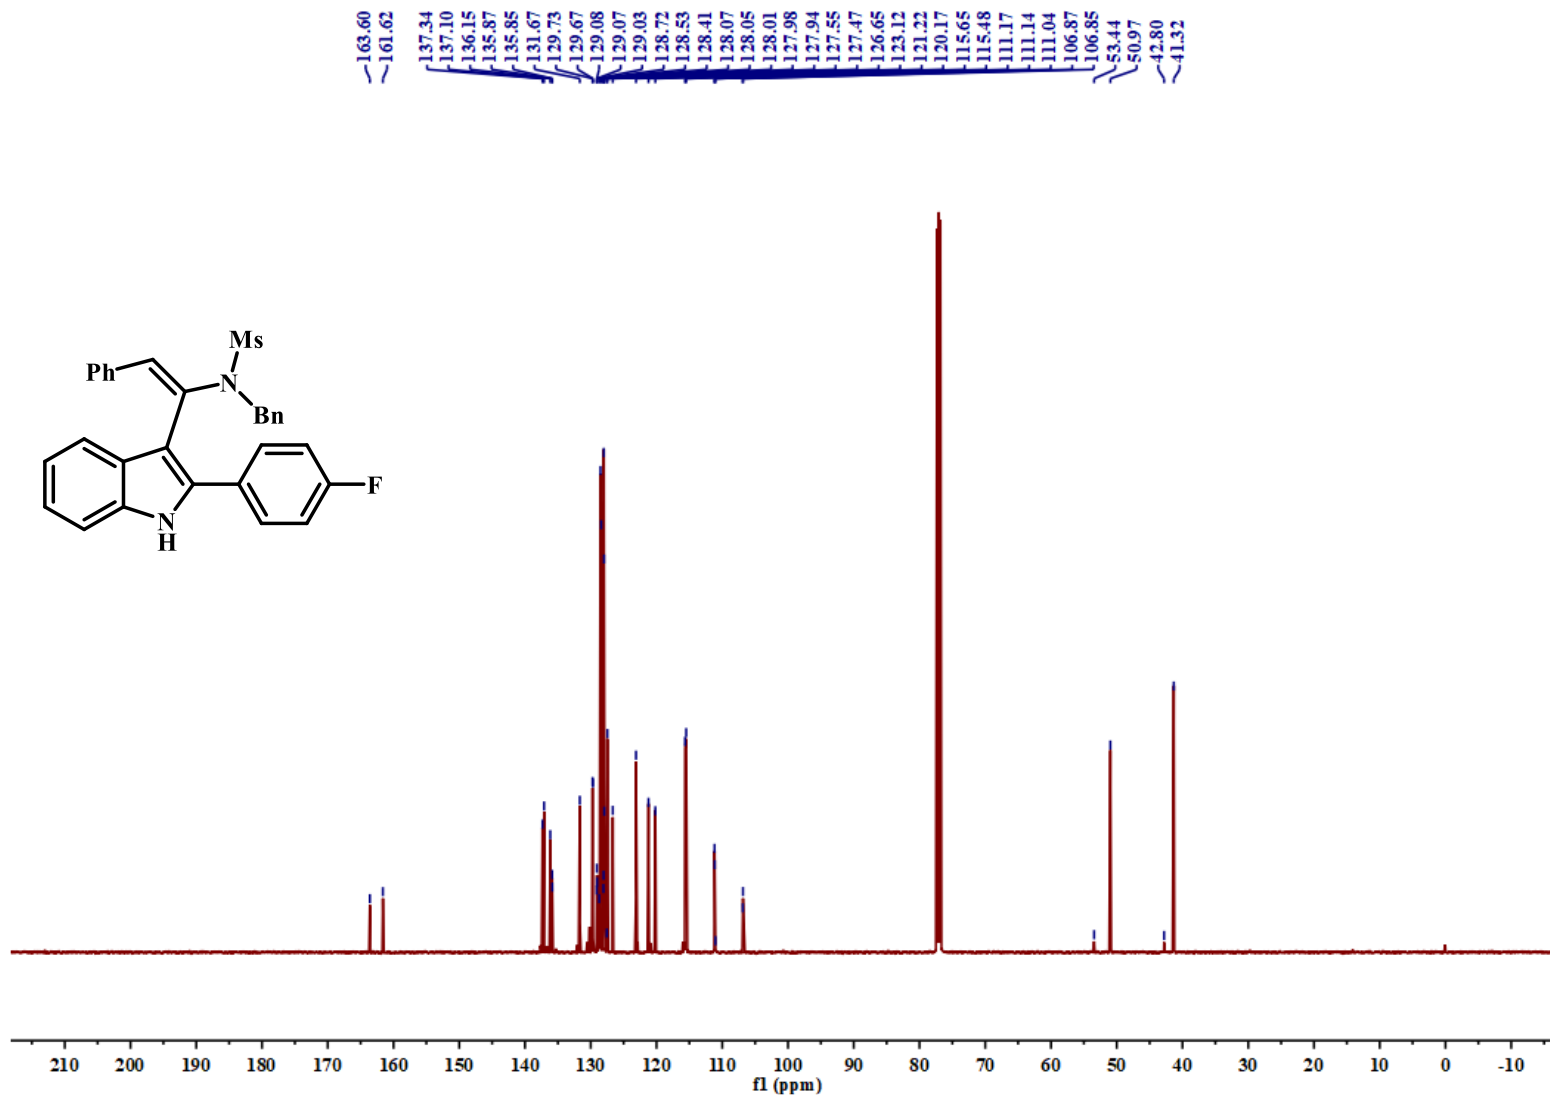

**(E)-N-Benzyl-N-(1-(2-(4-fluorophenyl)-1H-indol-3-yl)-2-phenylvinyl)methanesulfonamide (3g)**

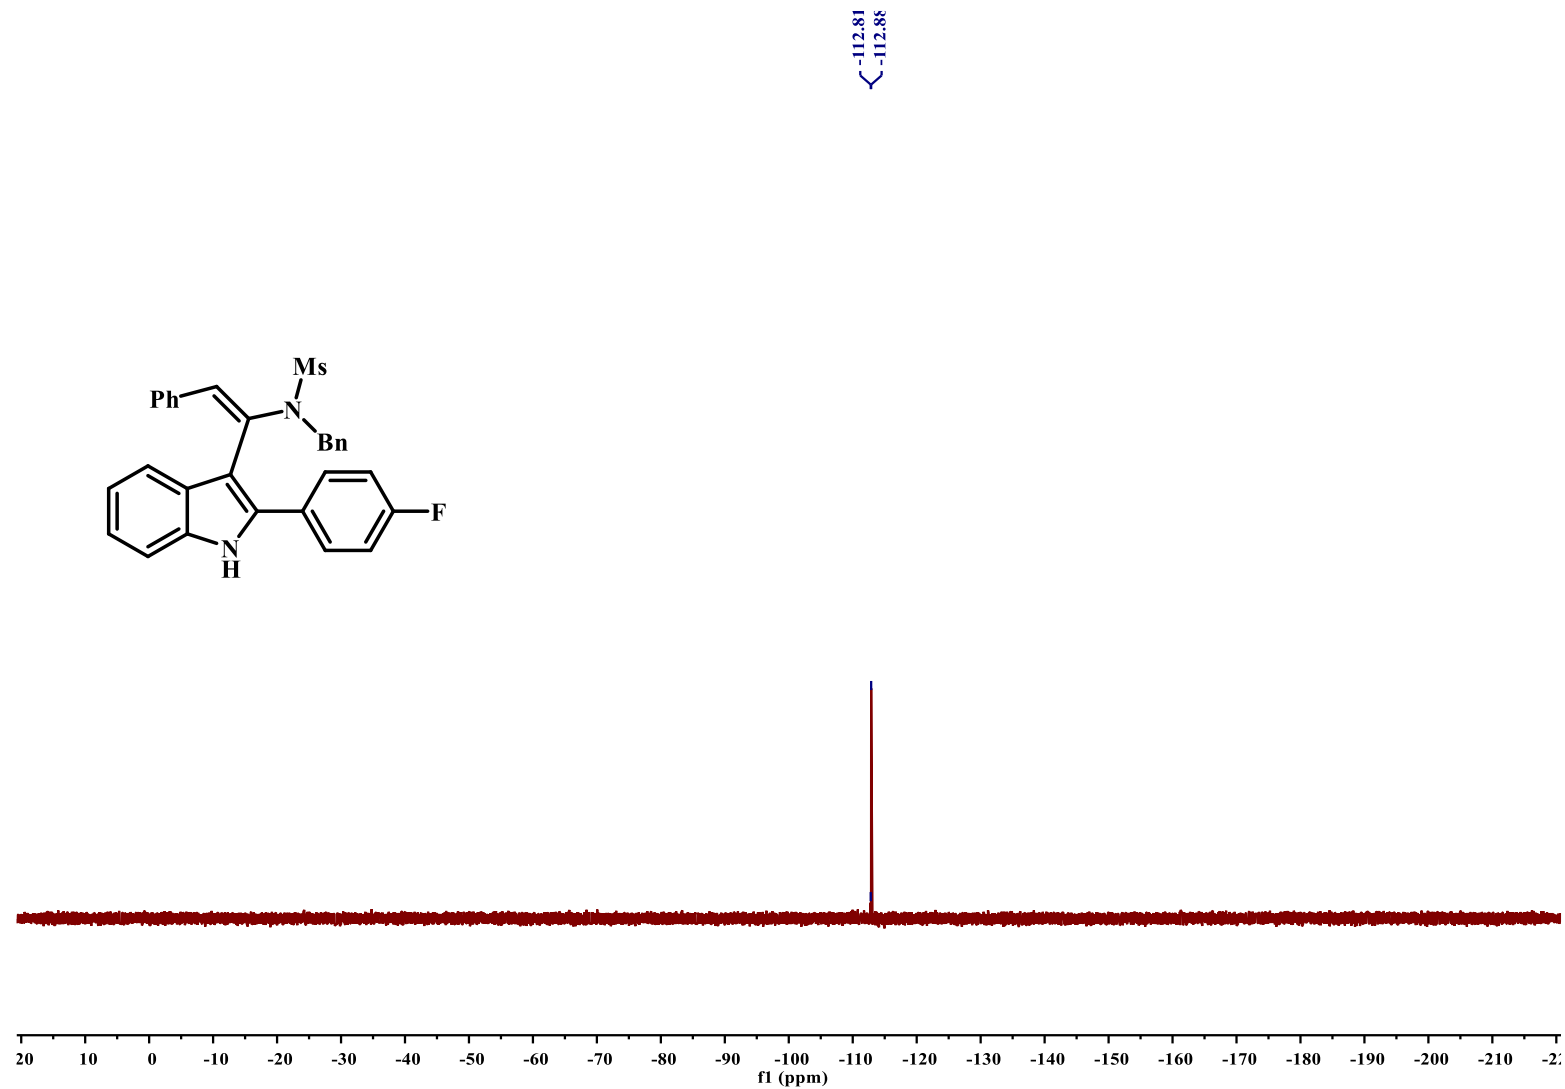

**(E)-N-Benzyl-N-(1-(6-chloro-2-phenyl-1H-indol-3-yl)-2-phenylvinyl)methanesulfonamide (3h)**

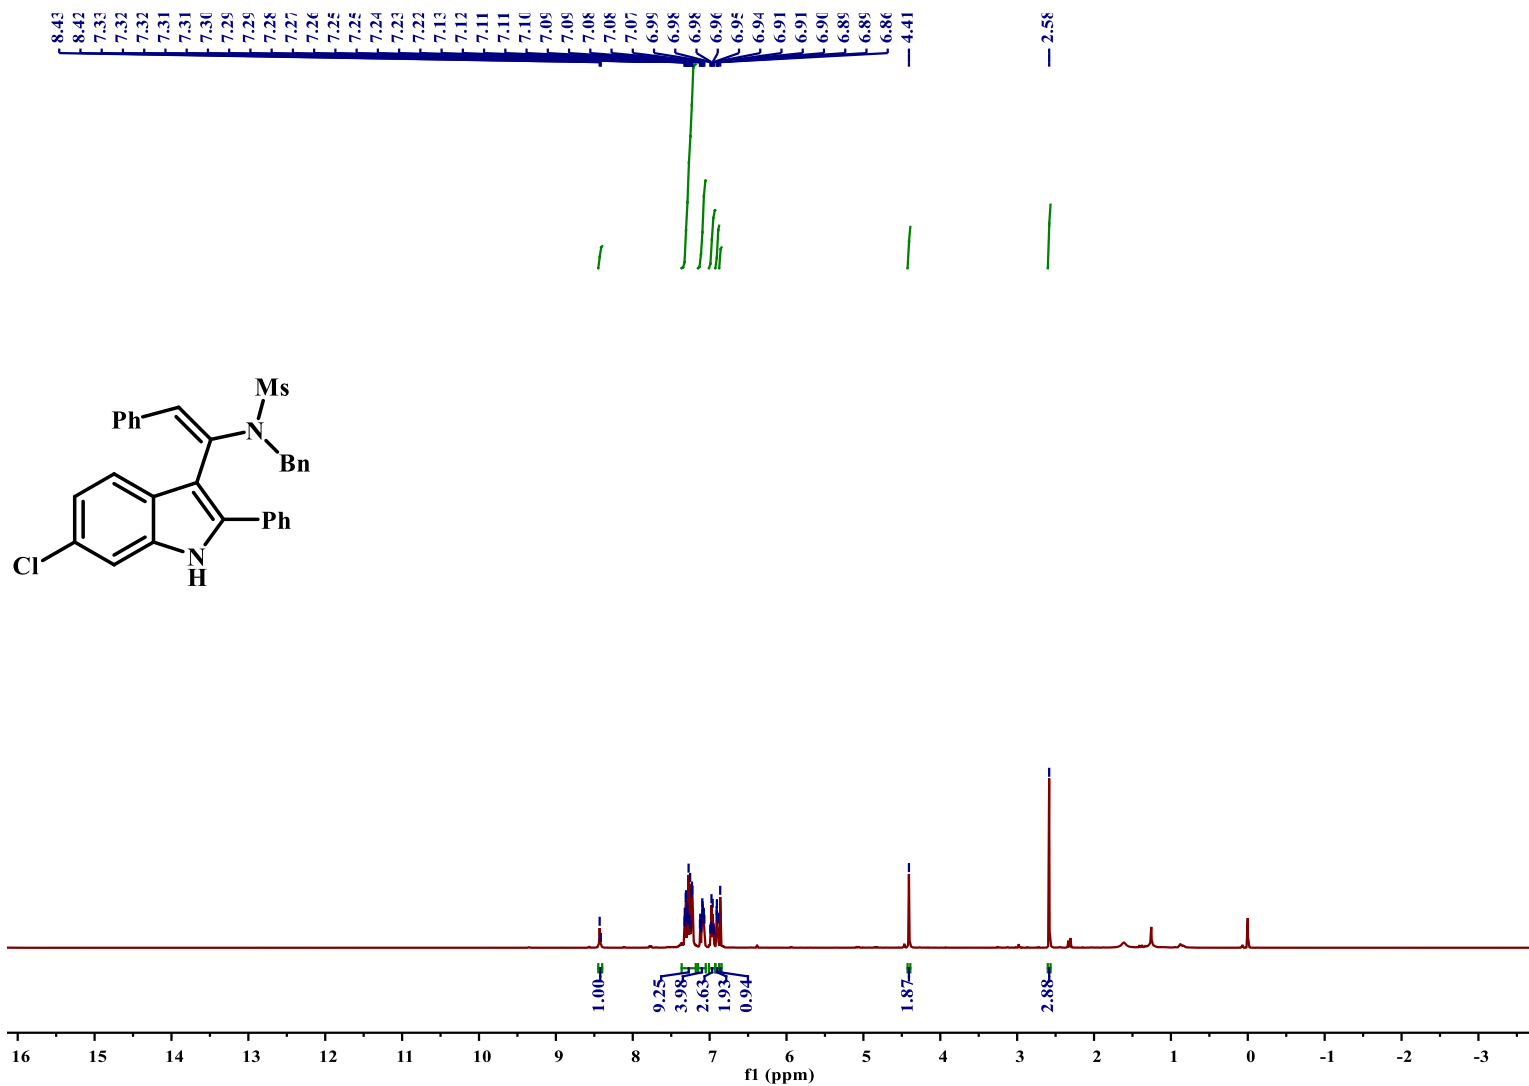

**(E)-N-Benzyl-N-(1-(6-chloro-2-phenyl-1H-indol-3-yl)-2-phenylvinyl)methanesulfonamide (3h)**

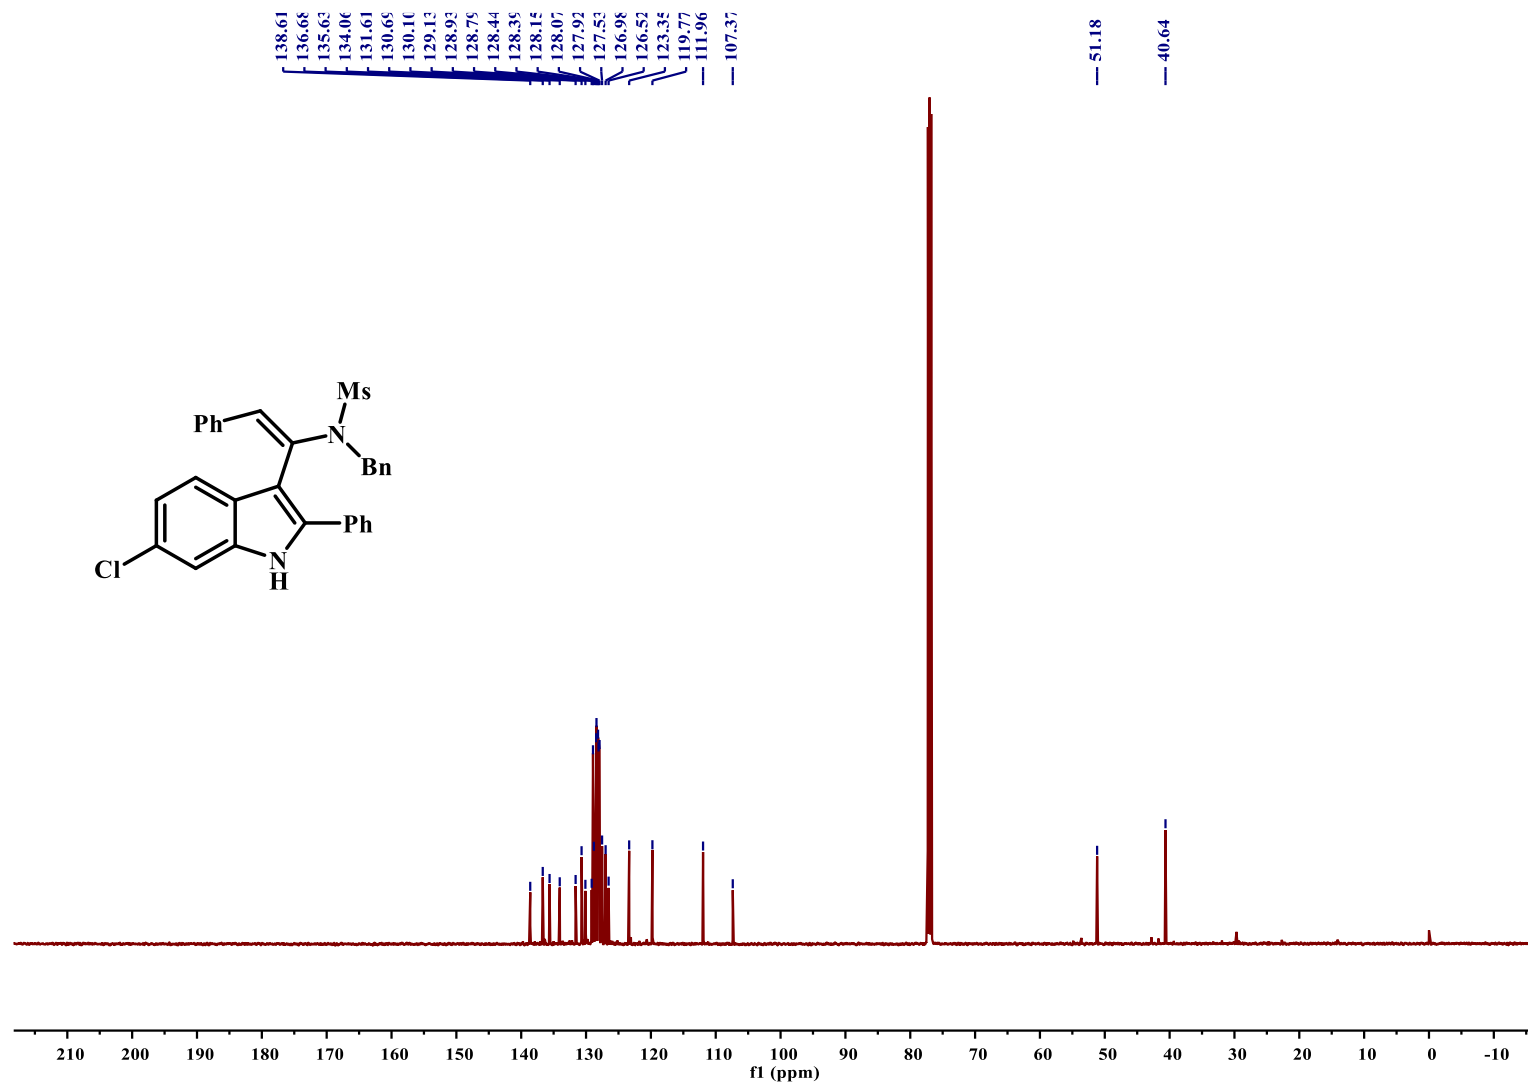

**(E)-N-Benzyl-N-(1-(5-methoxy-2-phenyl-1H-indol-3-yl)-2-phenylvinyl)methanesulfonamide (3i)**

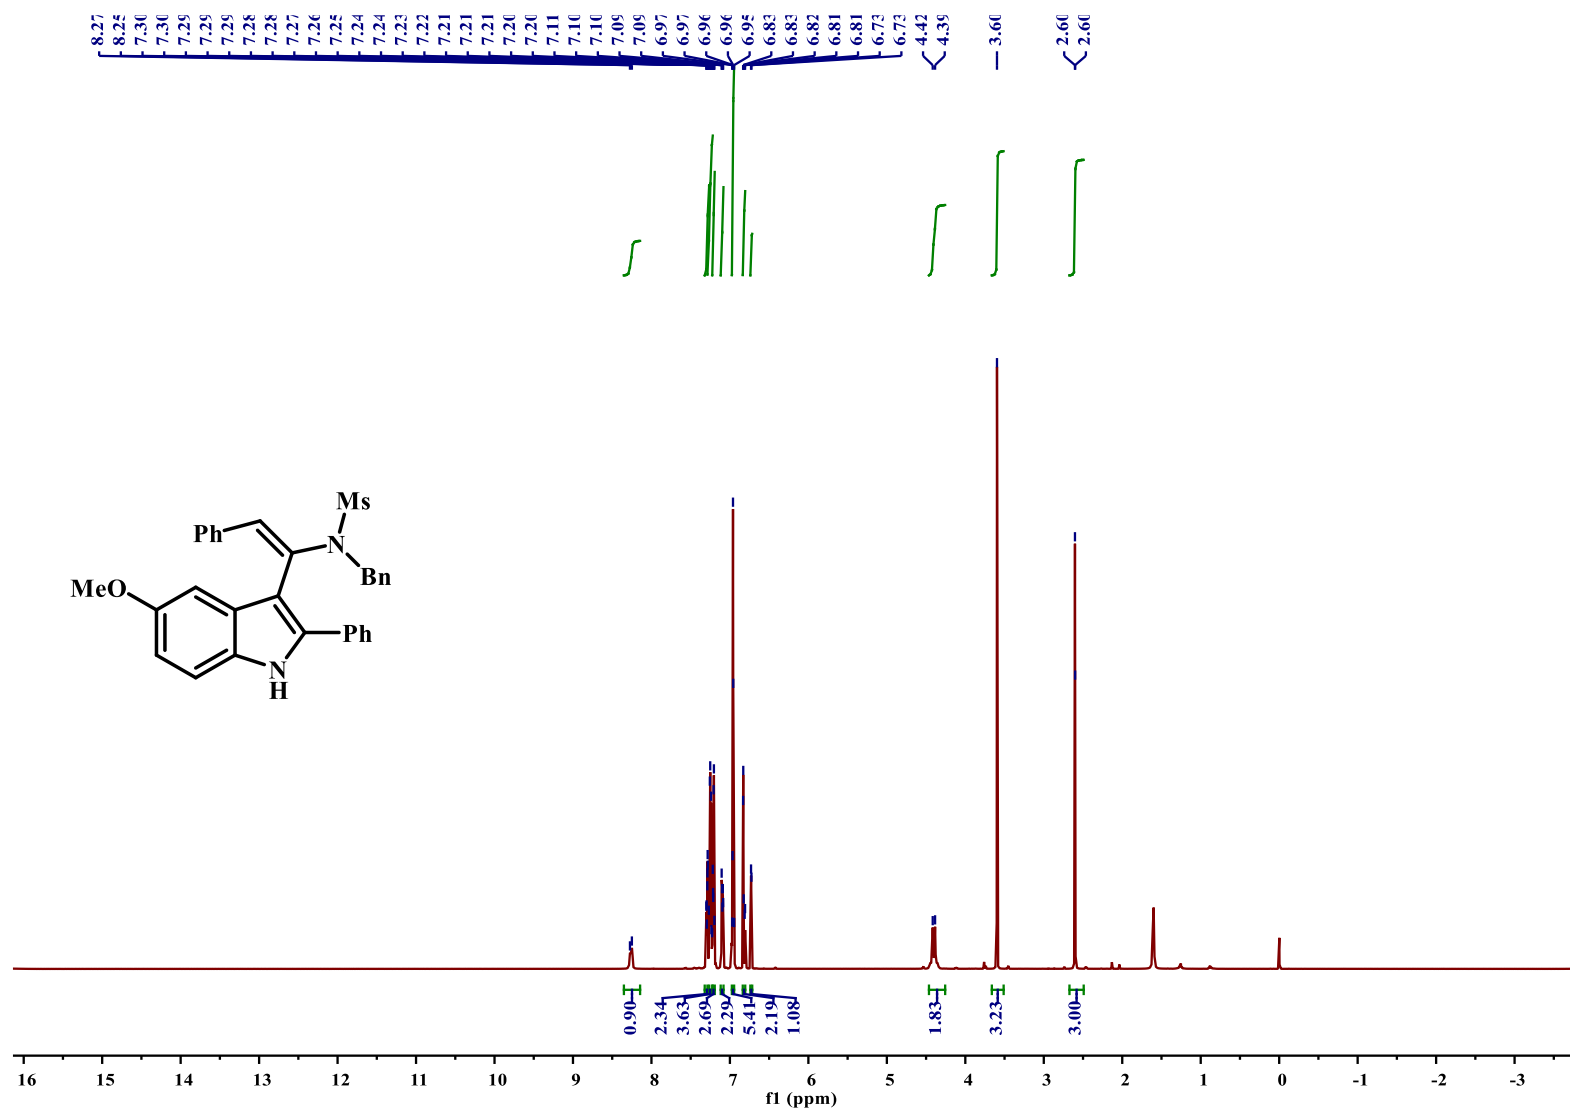

**(E)-N-Benzyl-N-(1-(5-methoxy-2-phenyl-1H-indol-3-yl)-2-phenylvinyl)methanesulfonamide (3i)**

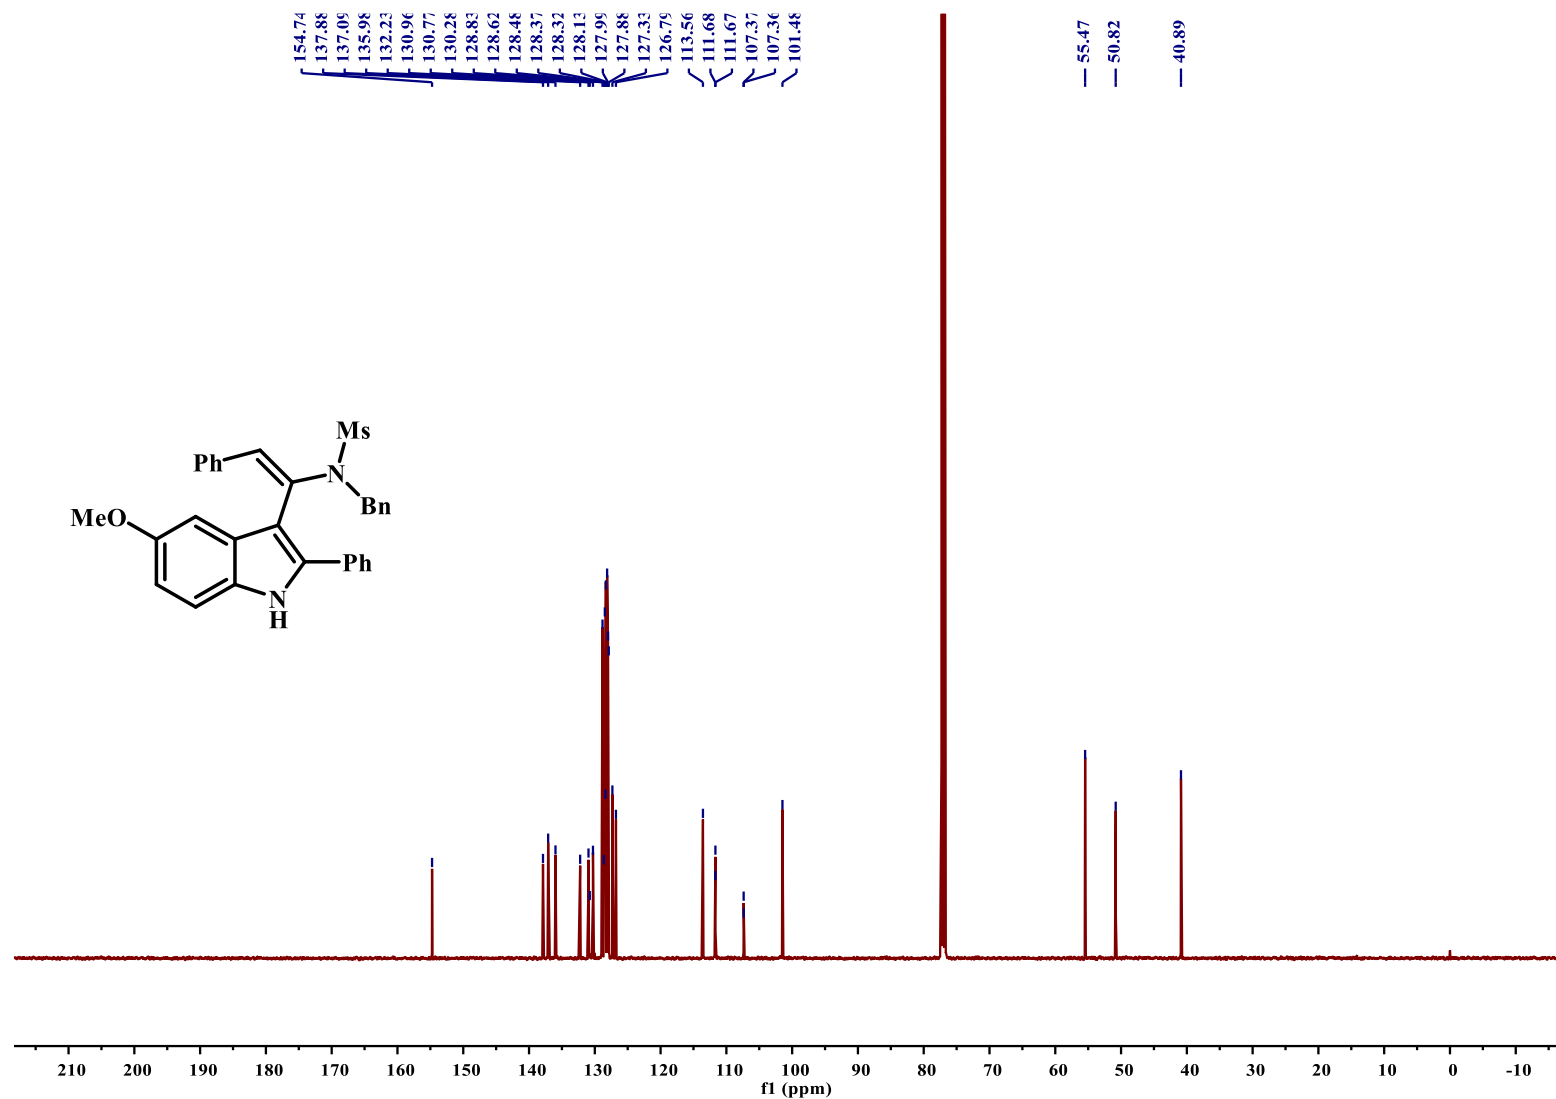

**(E)-4-Methyl-N-phenyl-N-(2-phenyl-1-(2-phenyl-1*H*-indol-3-yl)vinyl)benzenesulfonamide (3j)**

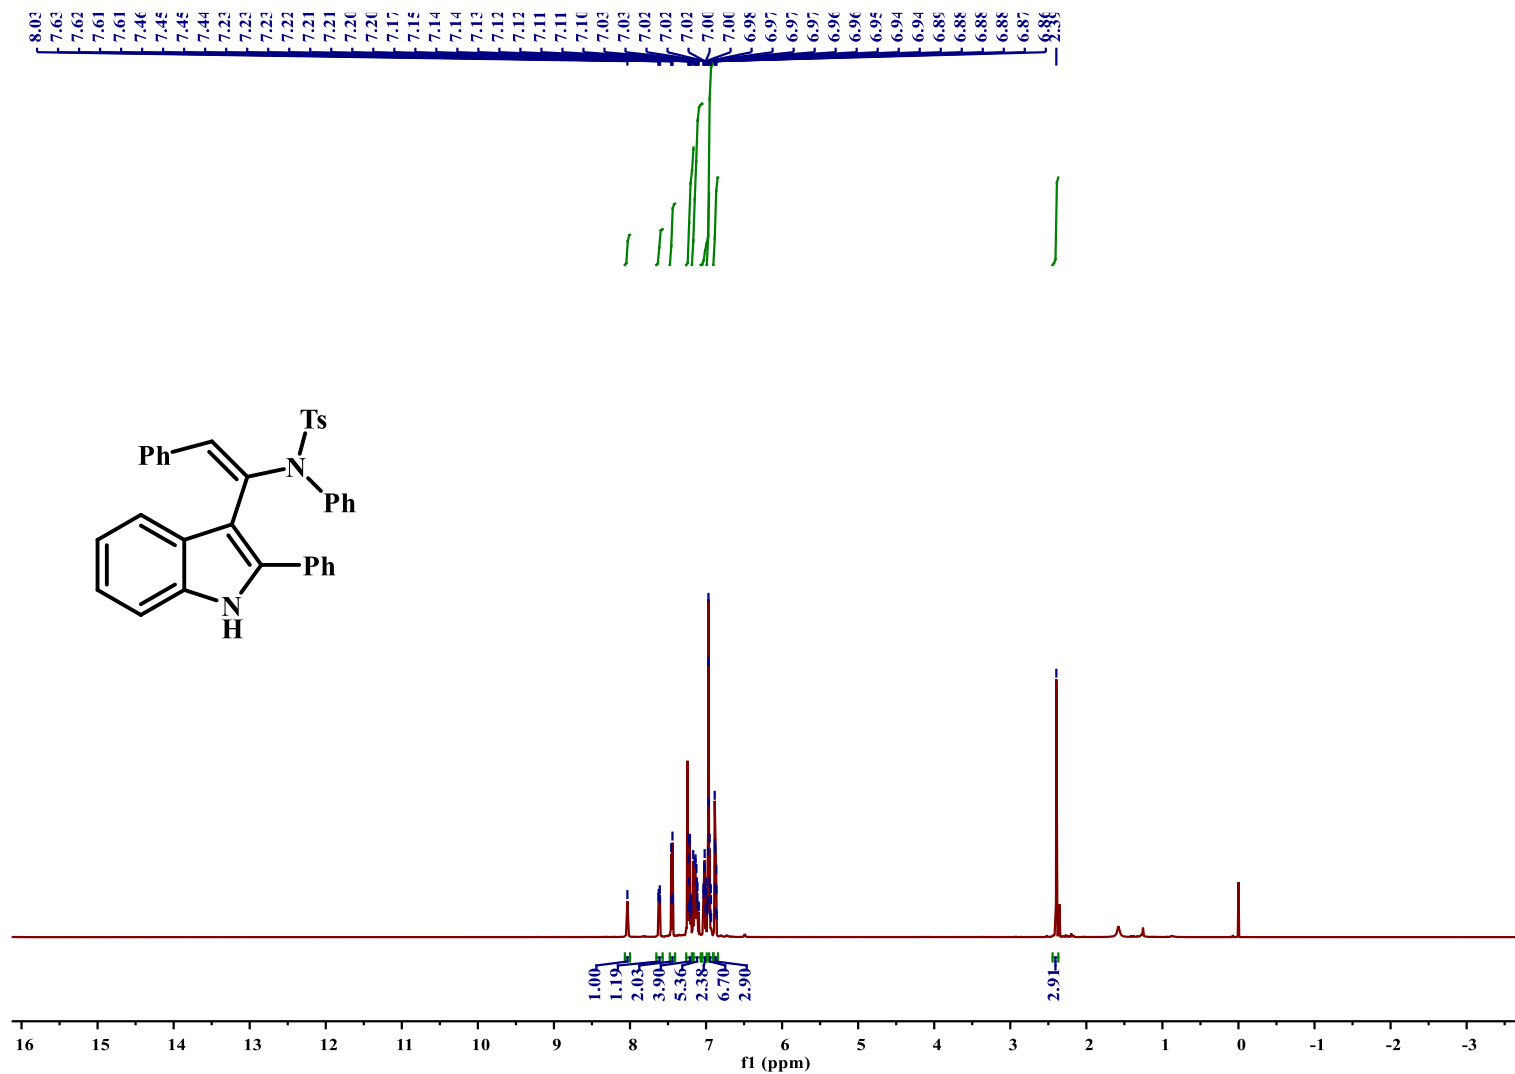

**(E)-4-Methyl-N-phenyl-N-(2-phenyl-1-(2-phenyl-1*H*-indol-3-yl)vinyl)benzenesulfonamide (3j)**

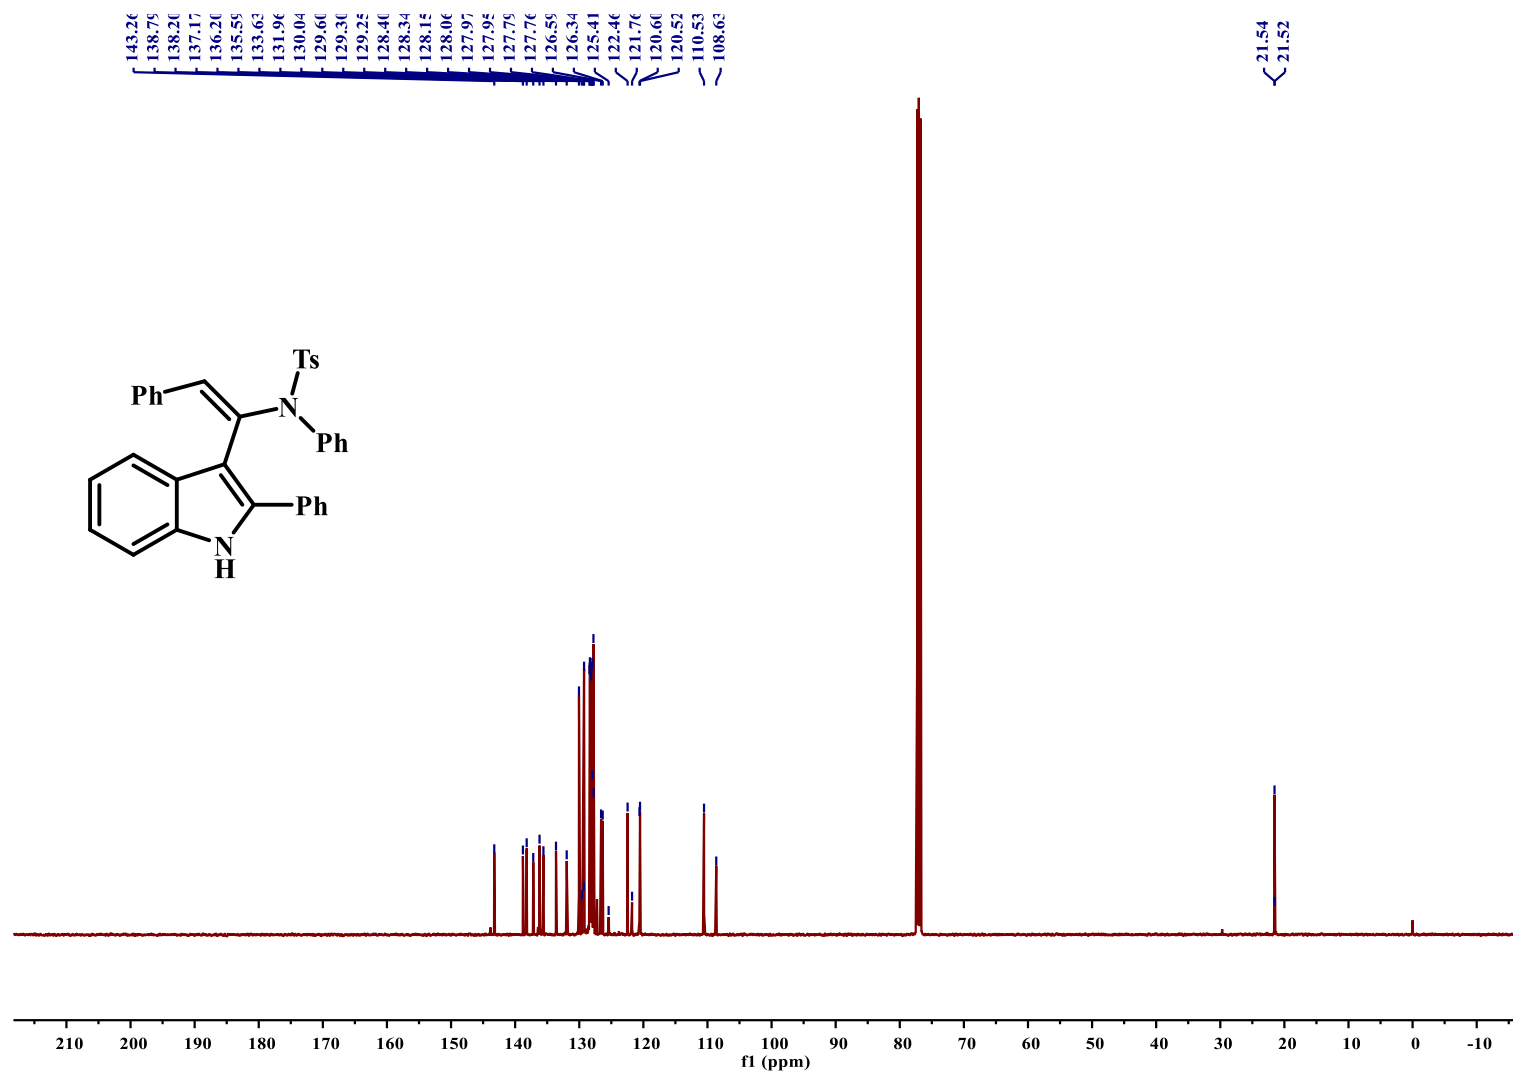



**(E)-N-Benzyl-4-methyl-N-(2-phenyl-1-(2-phenyl-1H-indol-3-yl)vinyl)benzenesulfonamide (3k)**

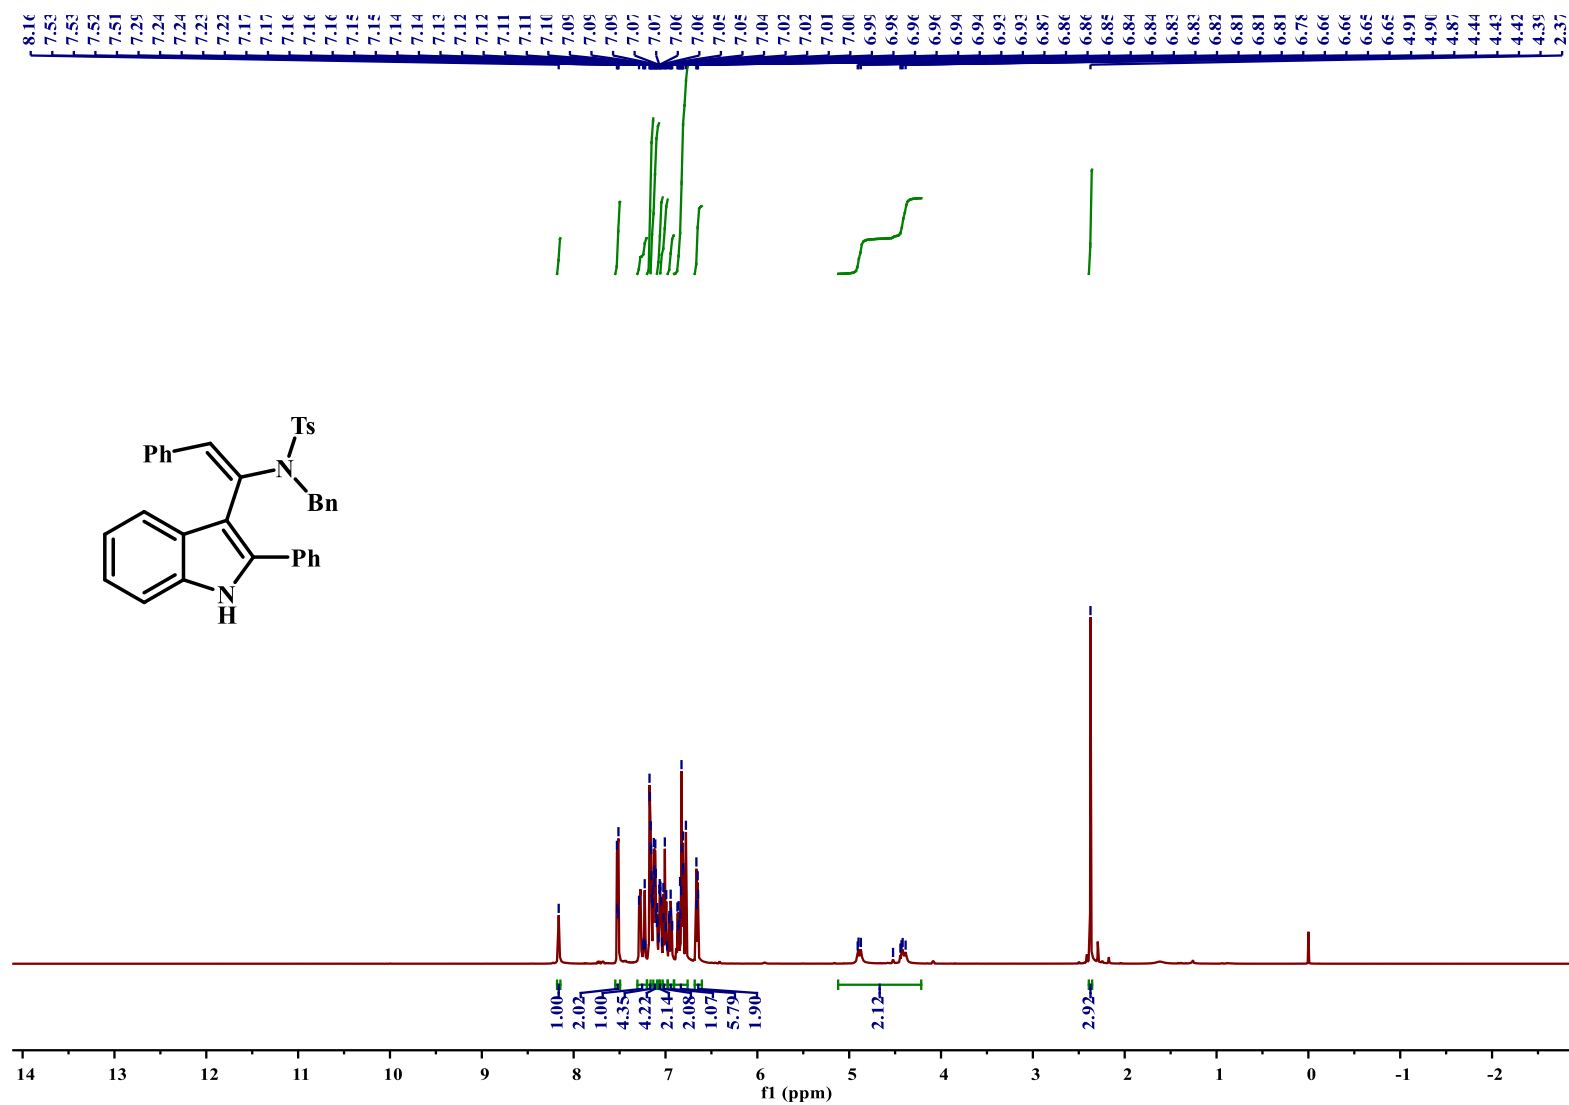

**(E)-N-Benzyl-4-methyl-N-(2-phenyl-1-(2-phenyl-1*H*-indol-3-yl)vinyl)benzenesulfonamide (3k)**

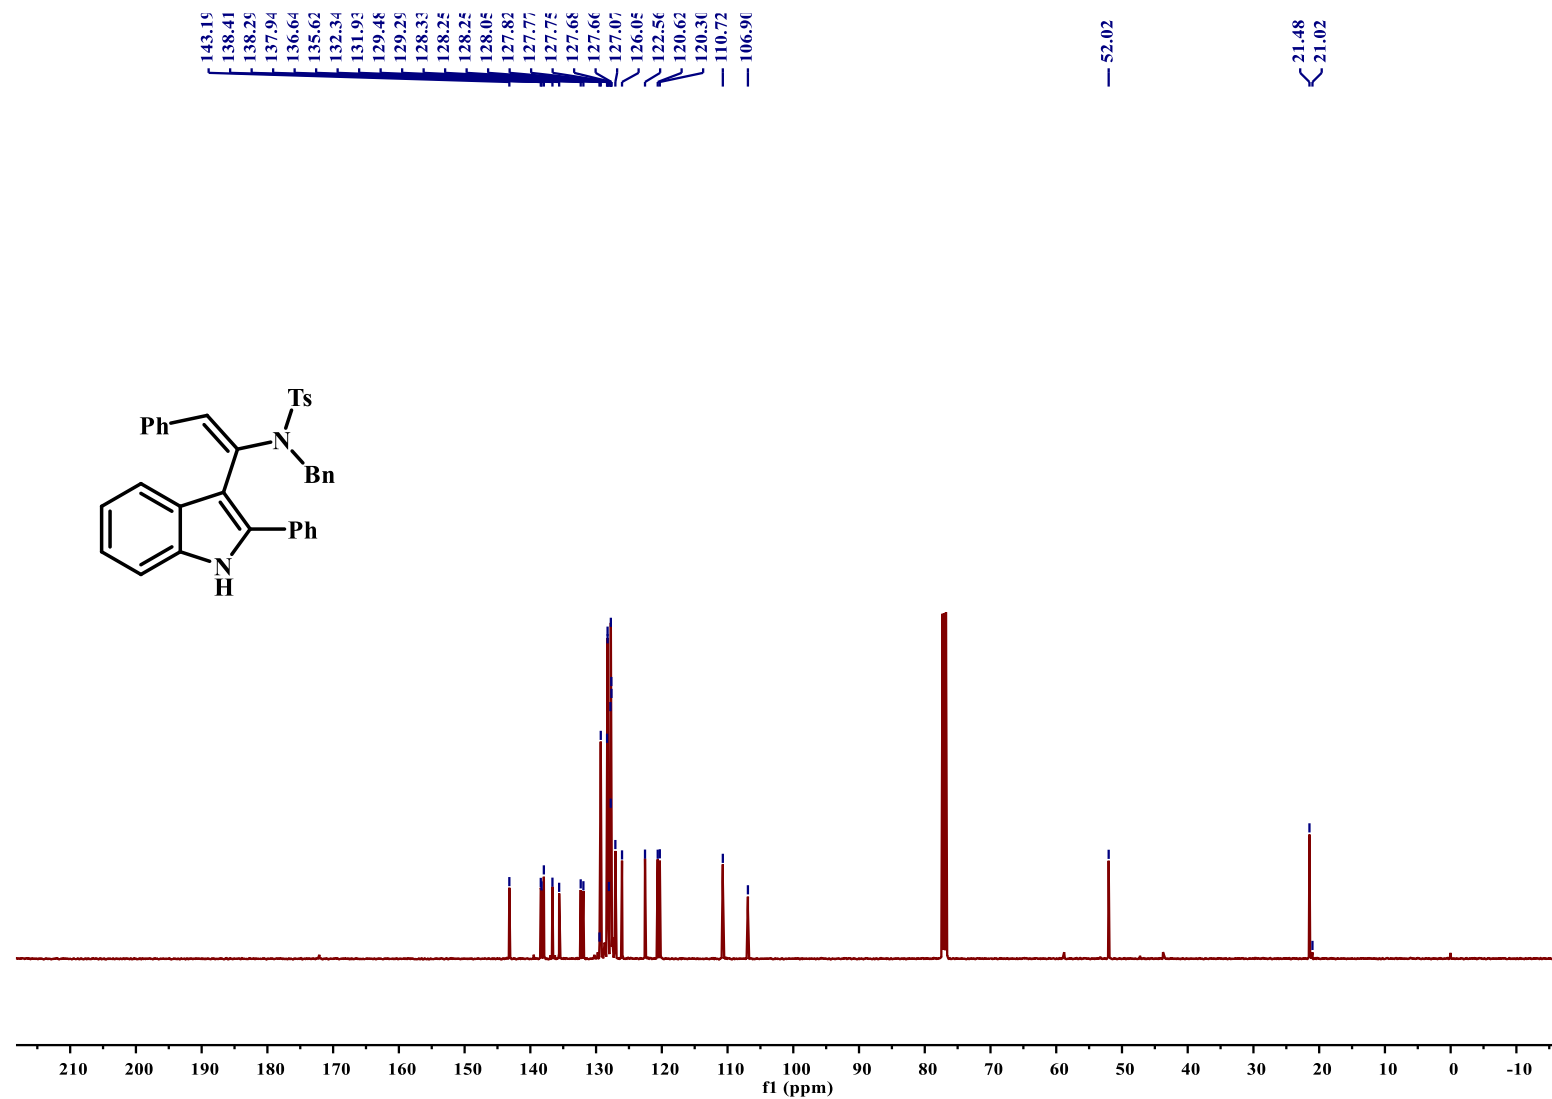

**(E)-N-Benzyl-N-(2-(3-chlorophenyl)-1-(2-phenyl-1H-indol-3-yl)vinyl)methanesulfonamide (3m)**

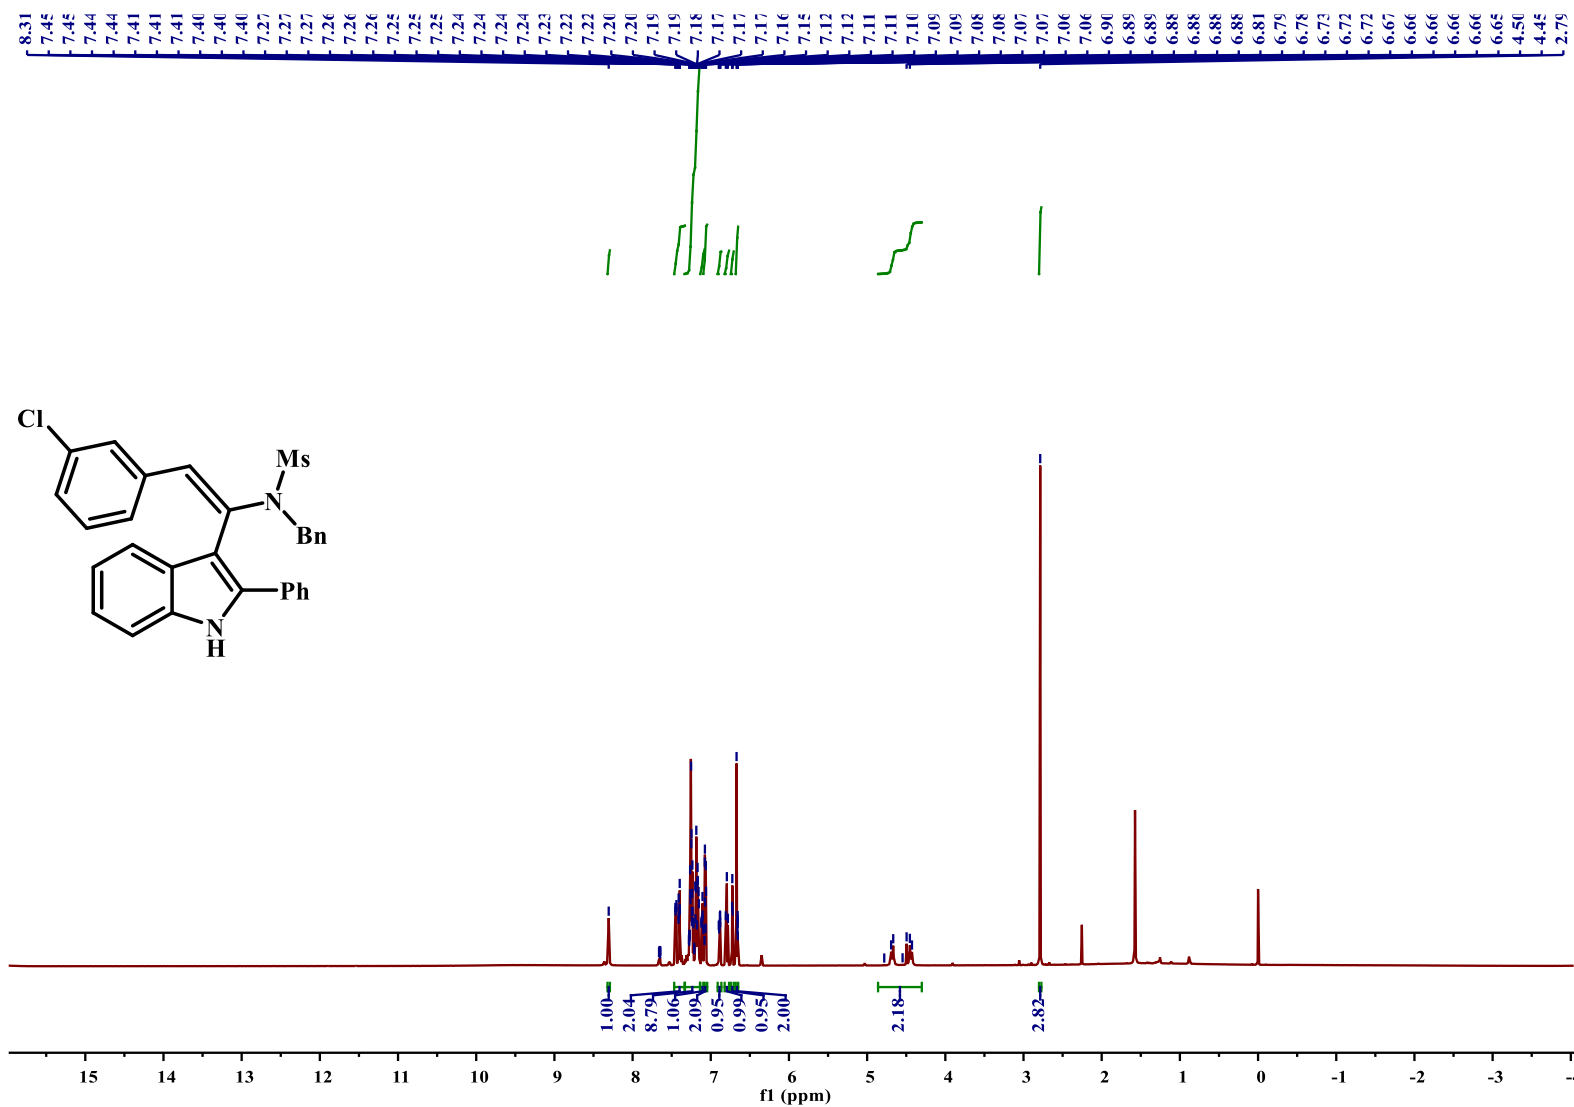

**(E)-N-Benzyl-N-(2-(3-chlorophenyl)-1-(2-phenyl-1H-indol-3-yl)vinyl)methanesulfonamide (3m)**

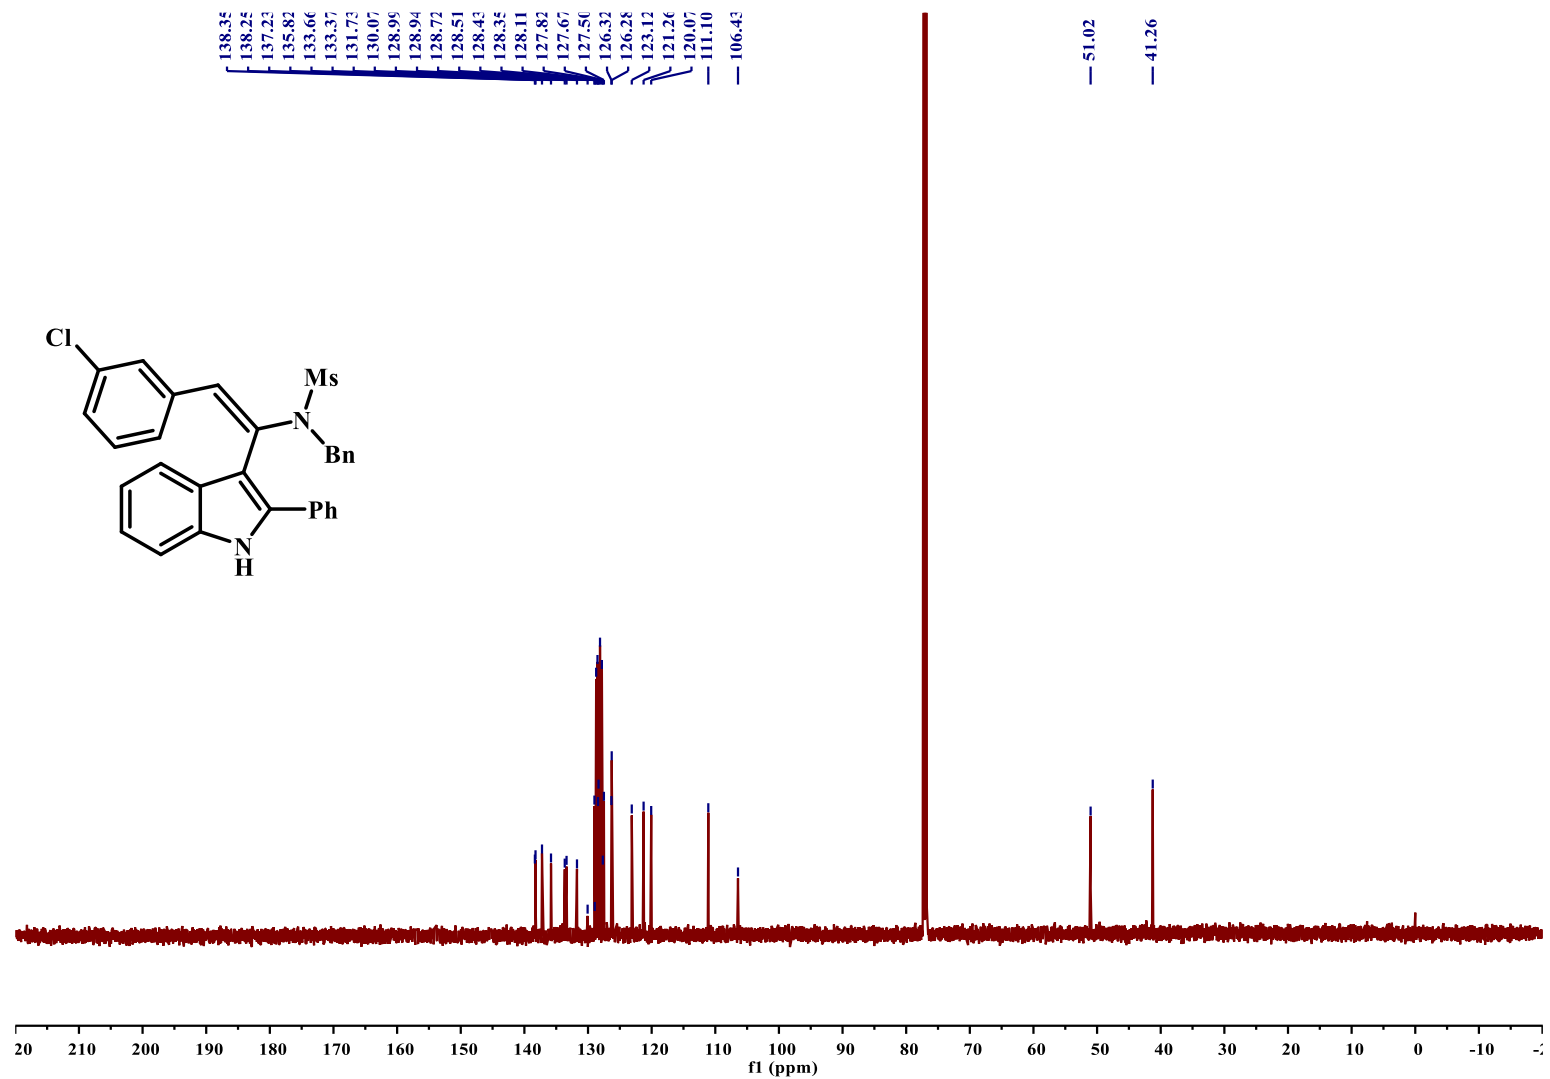

**(E)-N-Benzyl-N-(2-(4-chlorophenyl)-1-(2-phenyl-1H-indol-3-yl)vinyl)methanesulfonamide (3n)**

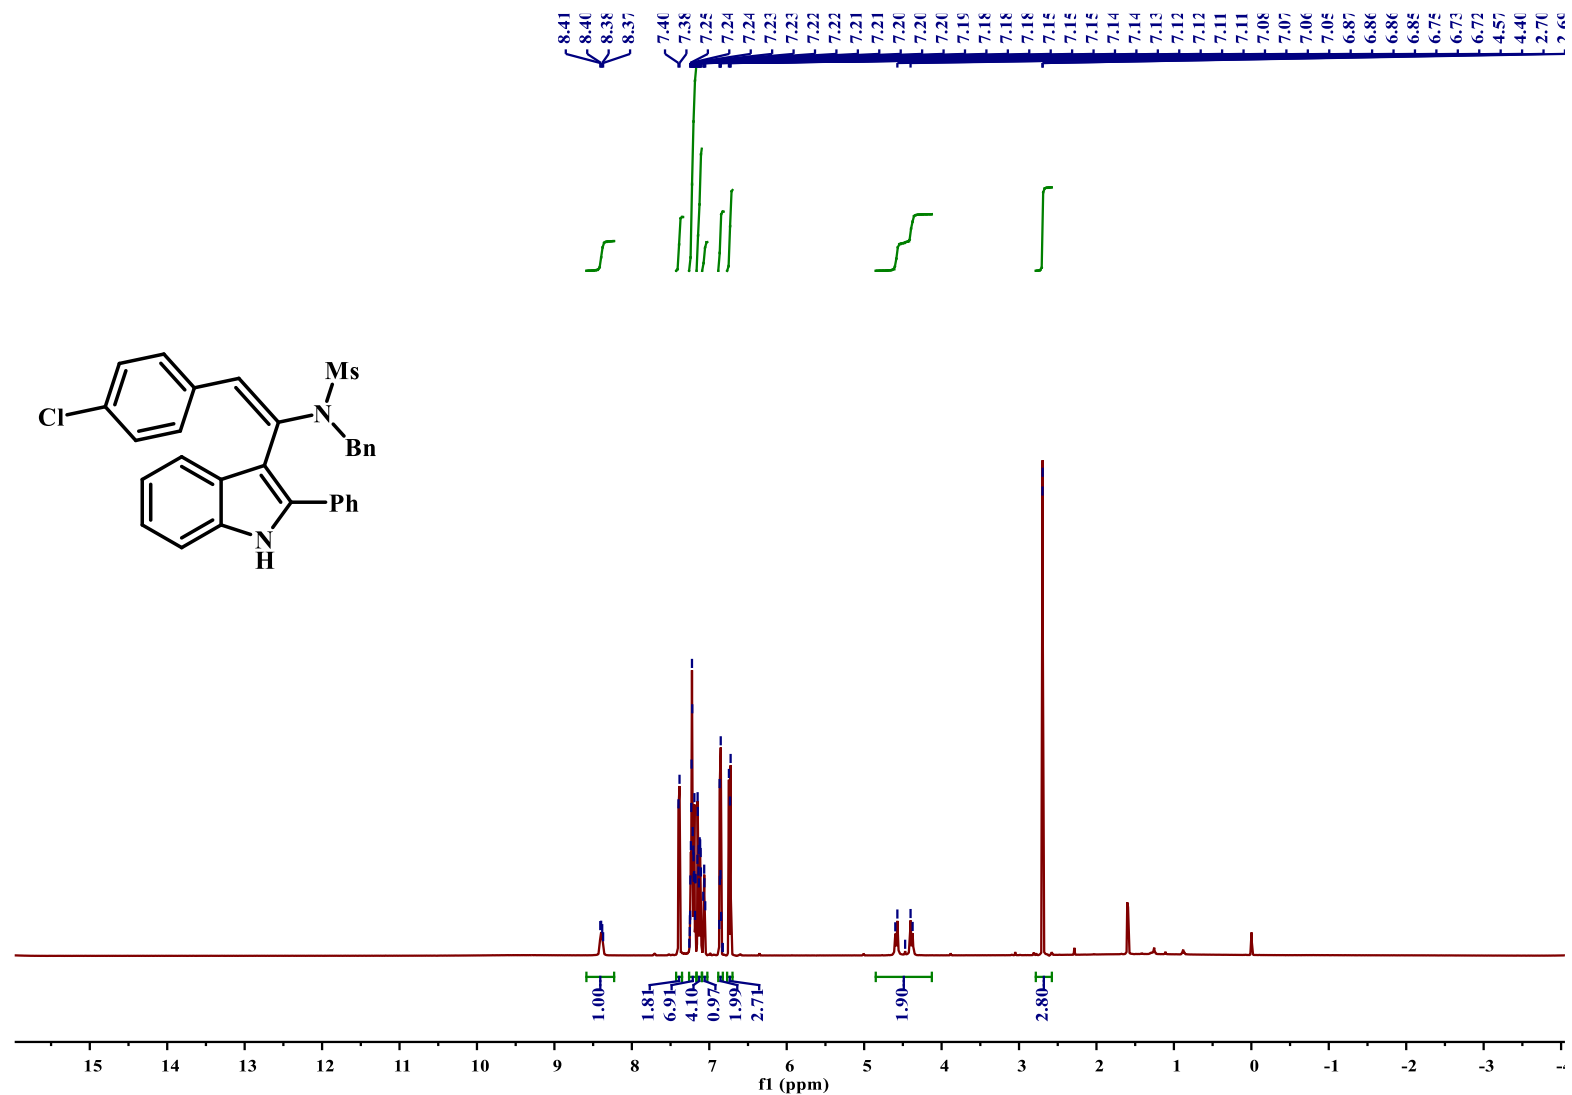

**(E)-N-Benzyl-N-(2-(4-chlorophenyl)-1-(2-phenyl-1H-indol-3-yl)vinyl)methanesulfonamide (3n)**

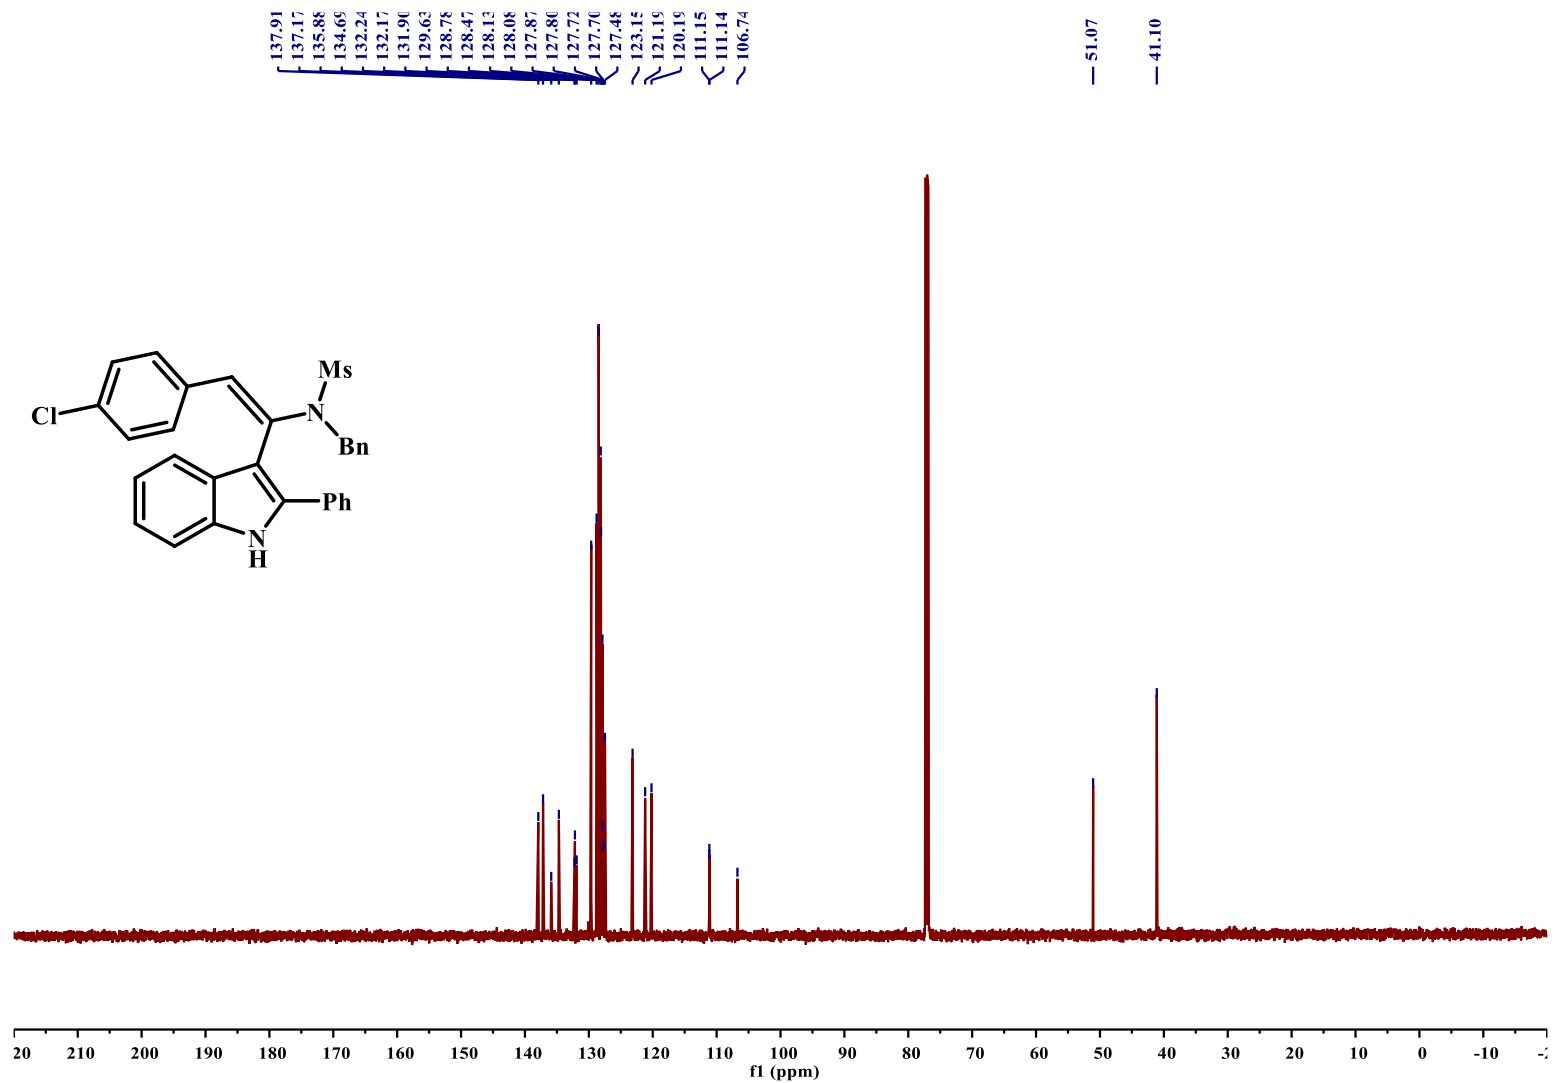

**(E)-N-(2-(4-Bromophenyl)-1-(2-phenyl-1H-indol-3-yl)vinyl)-4-methyl-N-phenylbenzenesulfonamide (3o)**

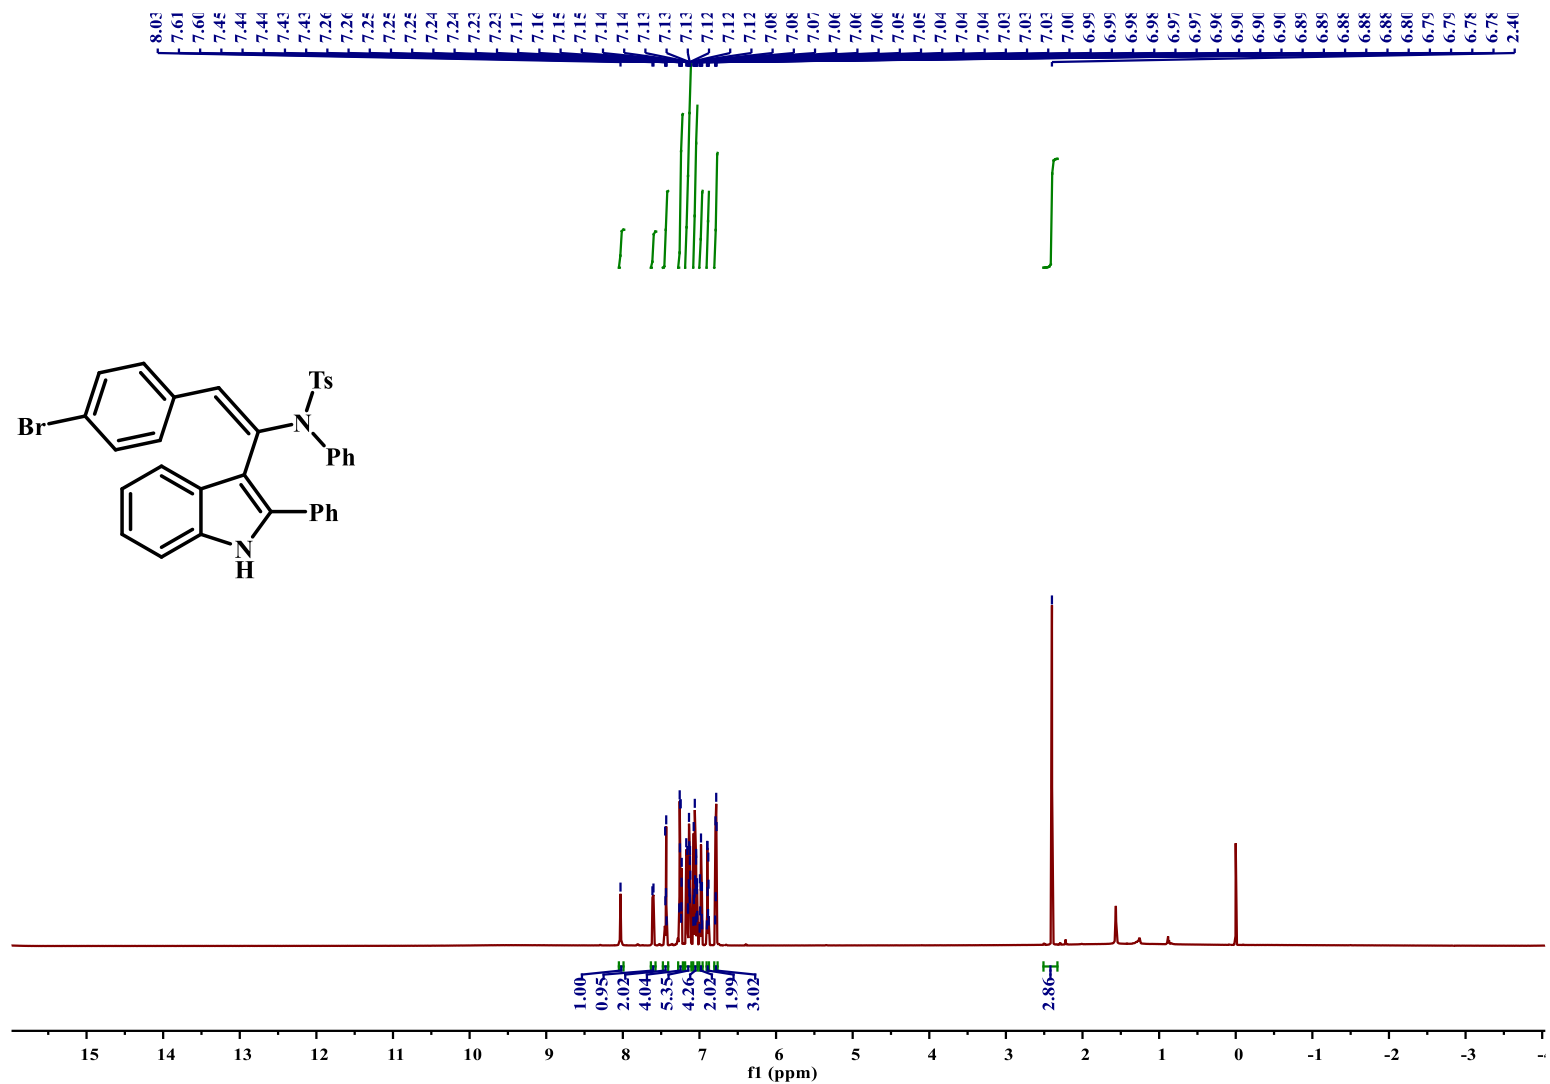

**(E)-N-(2-(4-Bromophenyl)-1-(2-phenyl-1*H*-indol-3-yl)vinyl)-4-methyl-*N*-phenylbenzenesulfonamide (3o)**

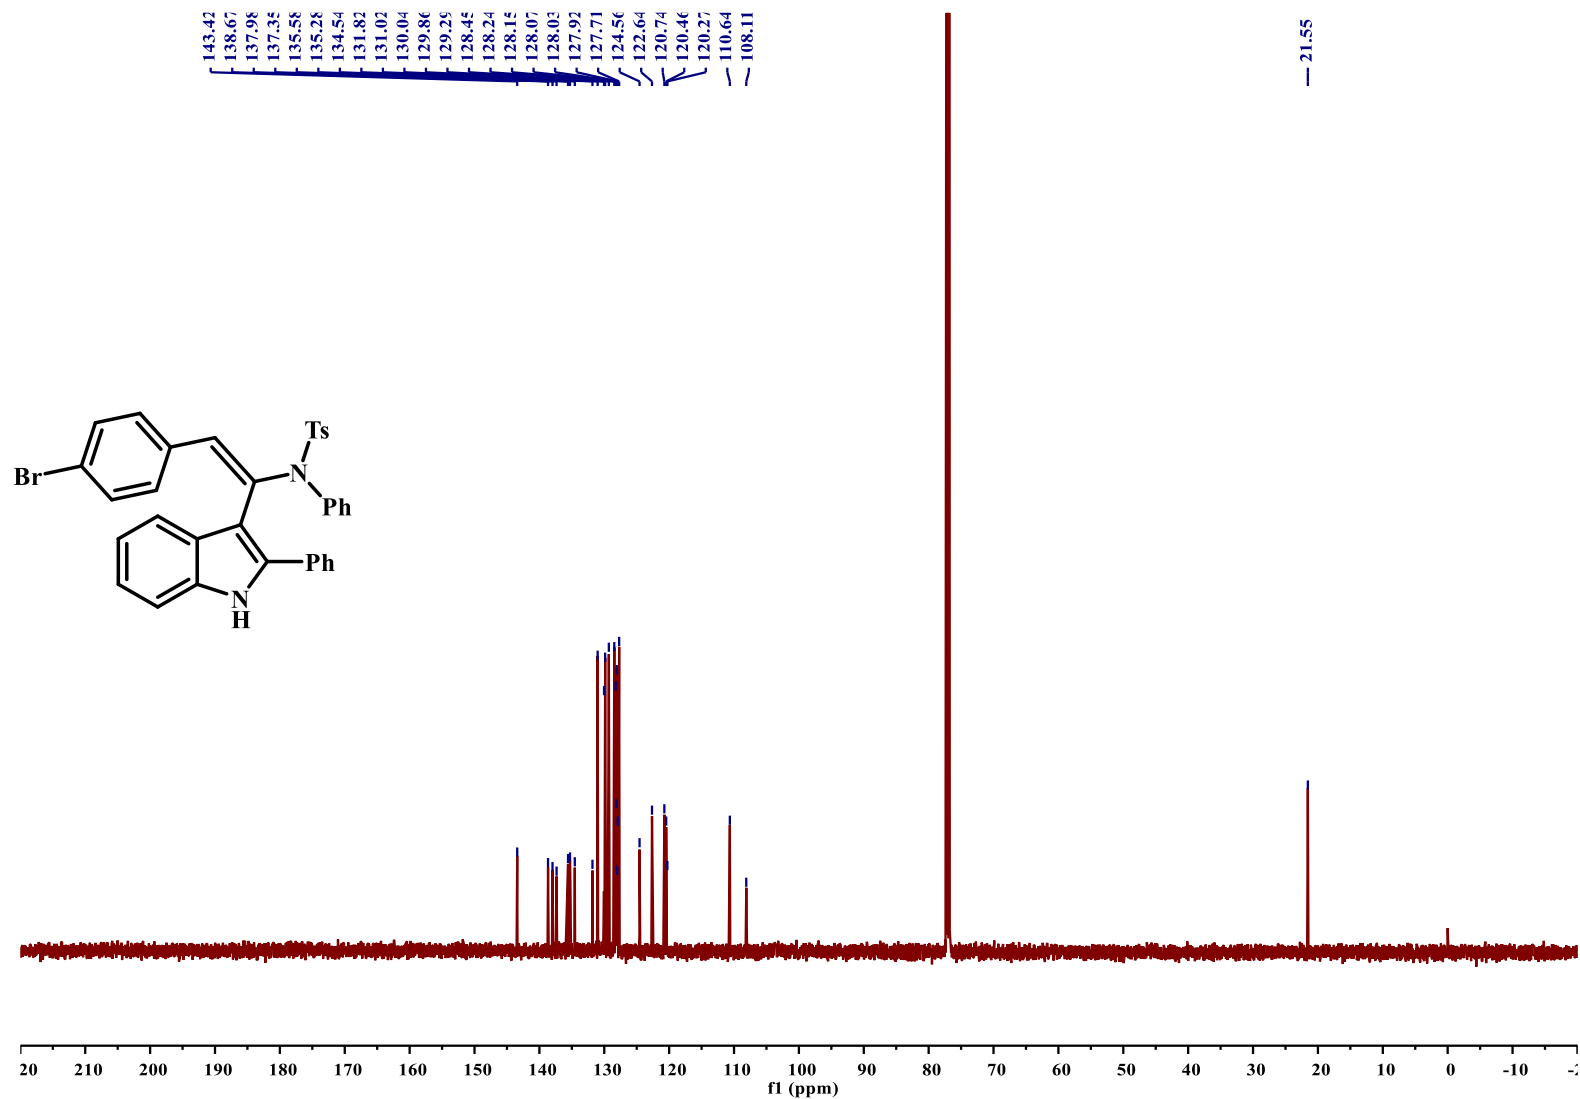



**(E)-4-Methyl-N-phenyl-N-(1-(2-phenyl-1H-indol-3-yl)-2-(p-tolyl)vinyl)benzenesulfonamide (3p)**

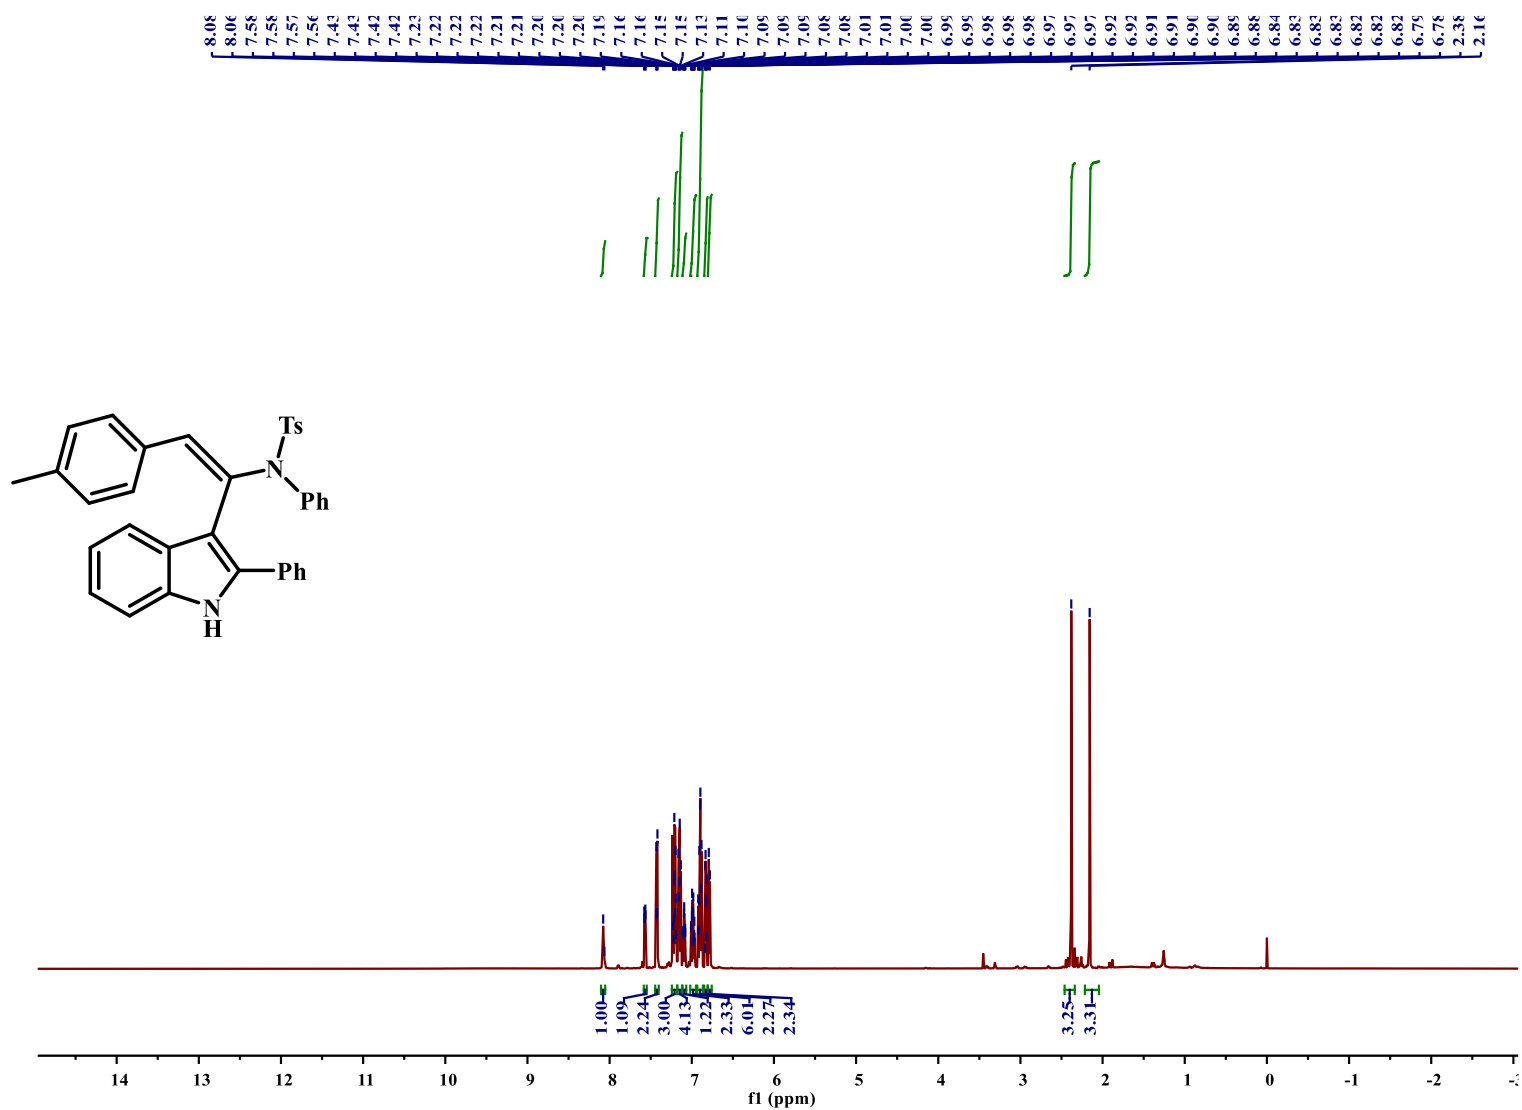

**(E)-4-Methyl-N-phenyl-N-(1-(2-phenyl-1H-indol-3-yl)-2-(p-tolyl)vinyl)benzenesulfonamide (3p)**

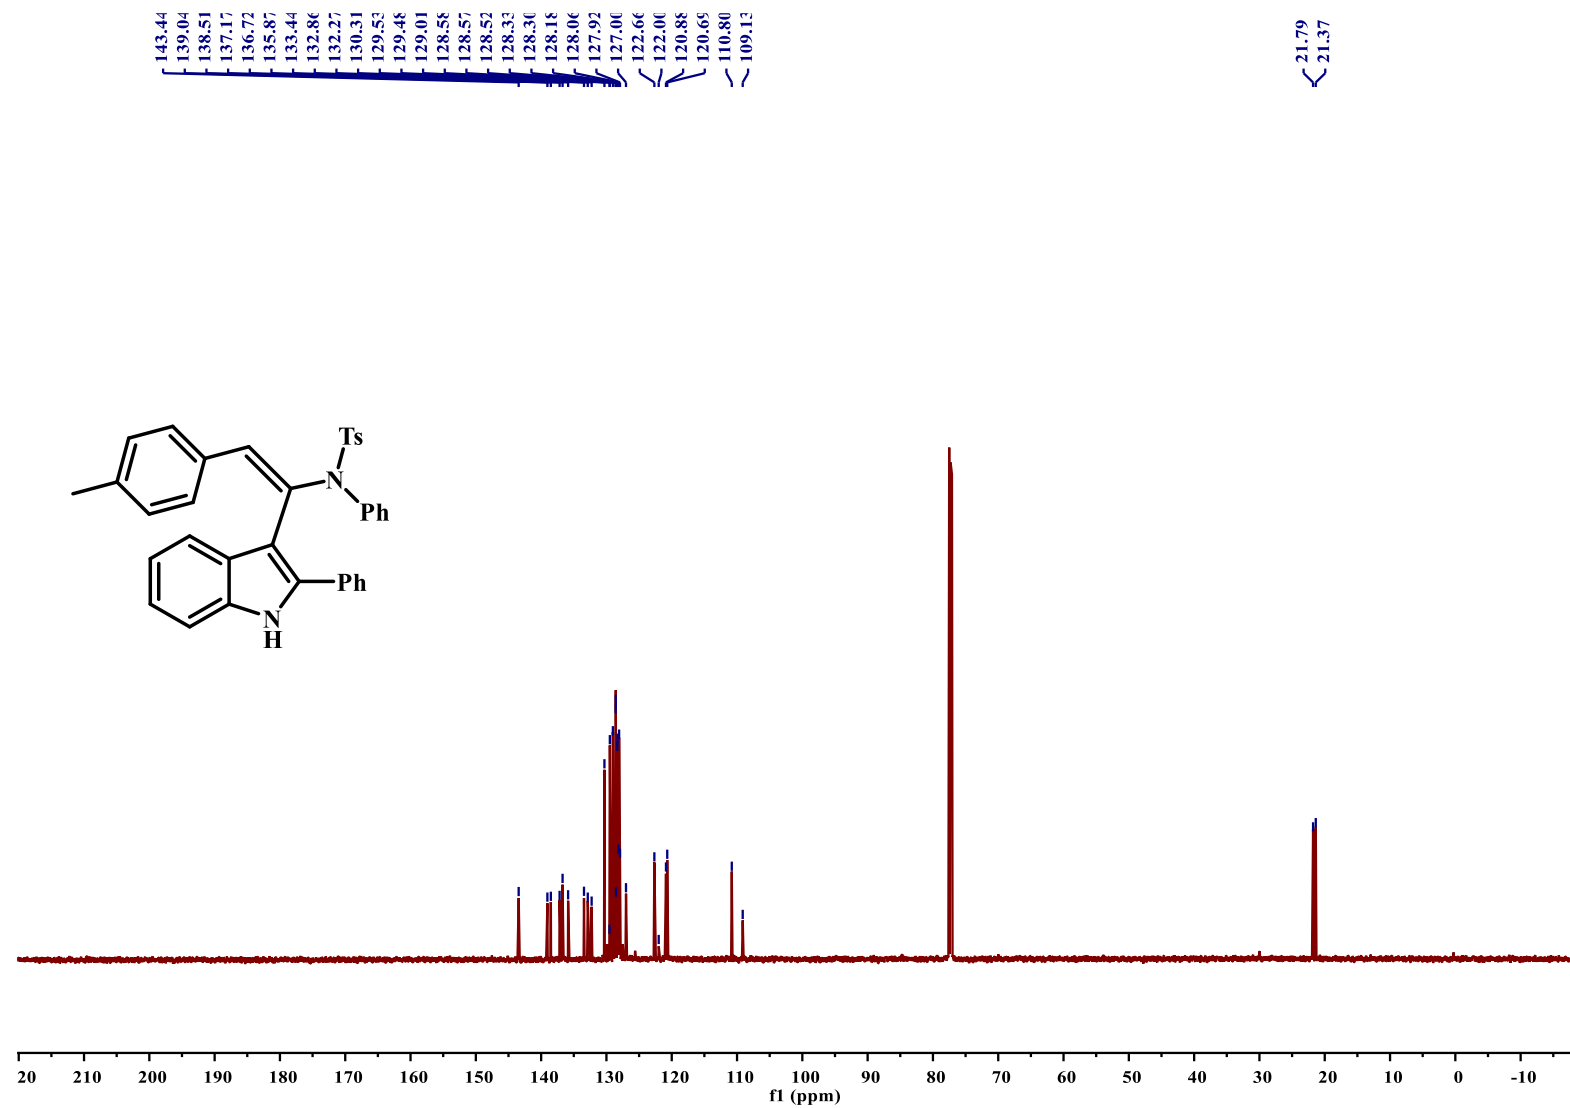

**(E)-N-Benzyl-N-(2-(3-methoxyphenyl)-1-(2-phenyl-1H-indol-3-yl)vinyl)methanesulfonamide (3q)**

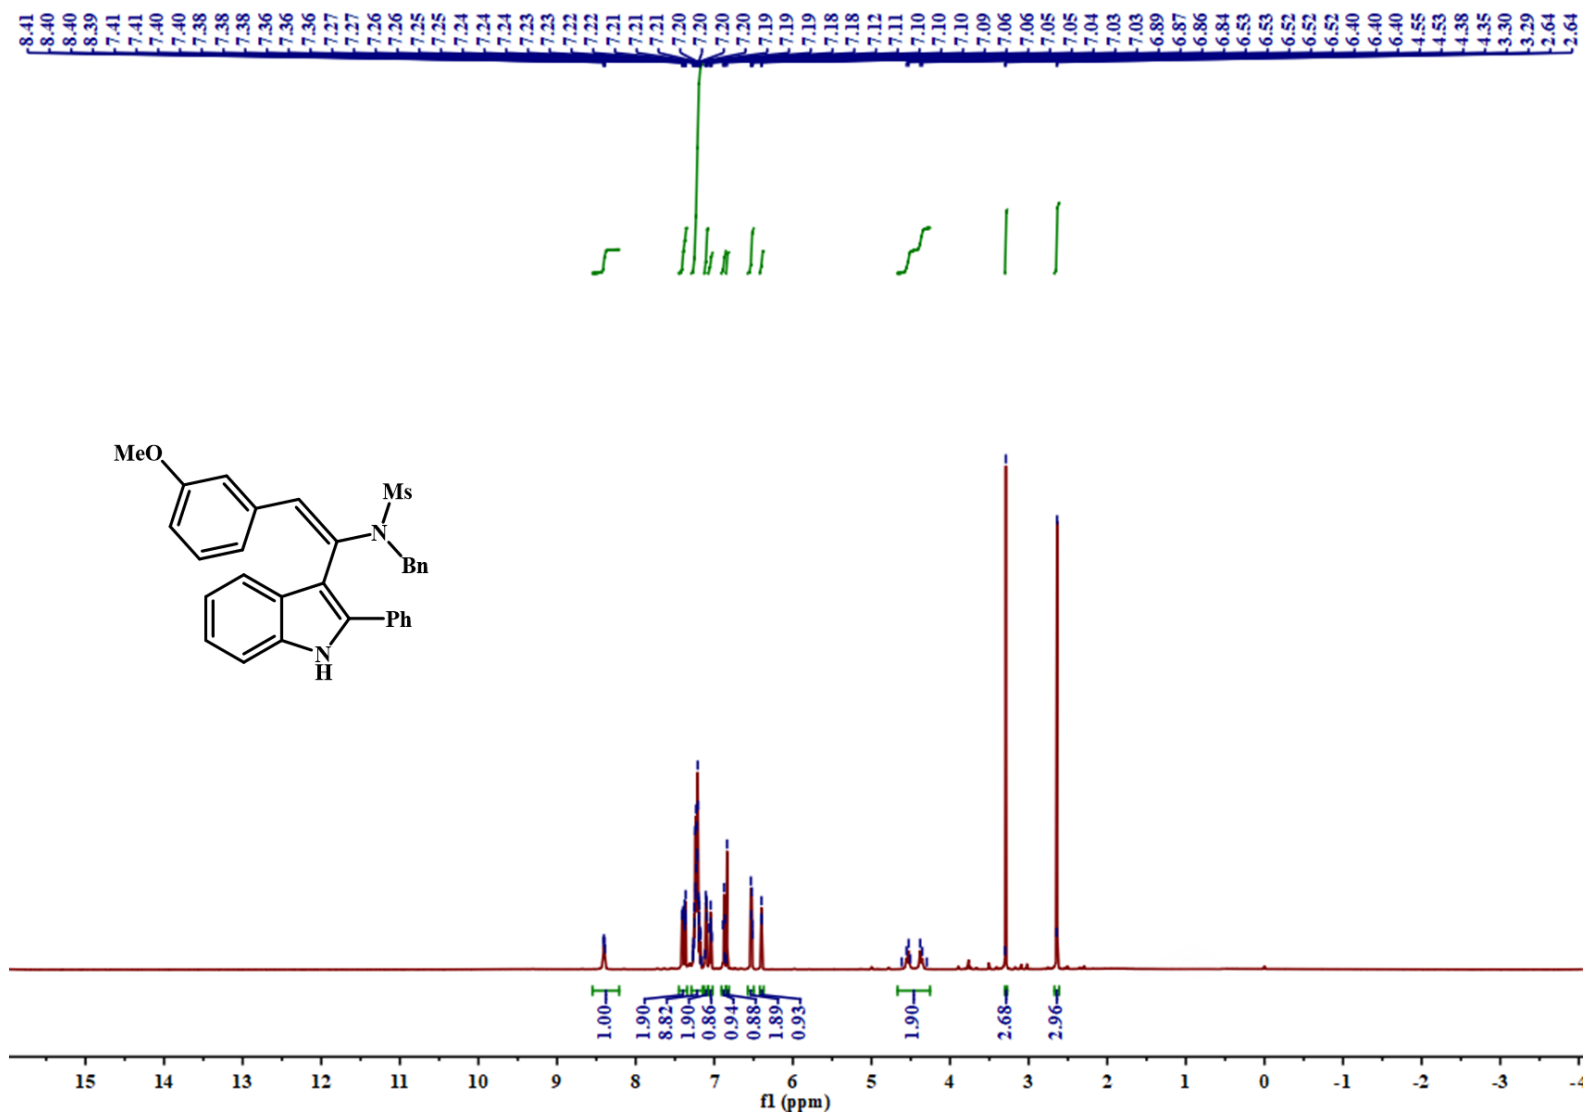

**(E)-N-Benzyl-N-(2-(3-methoxyphenyl)-1-(2-phenyl-1H-indol-3-yl)vinyl)methanesulfonamide (3q)**

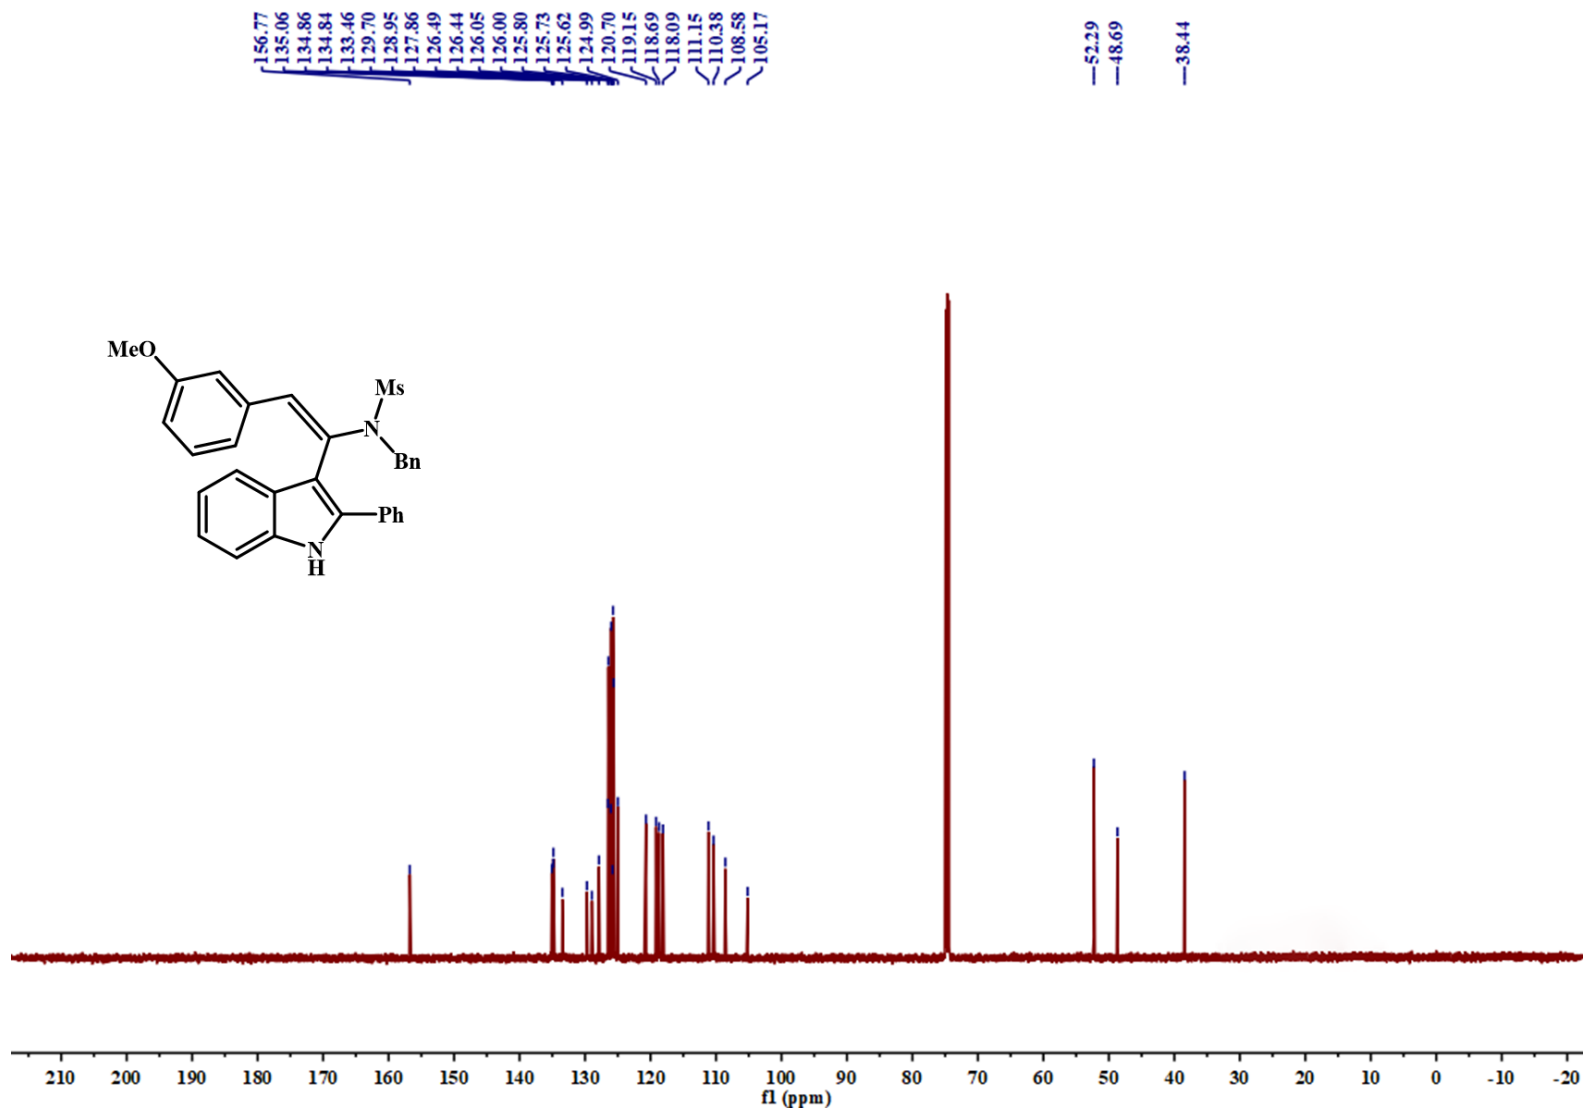



# 2-Phenyl-1H-indole (4)

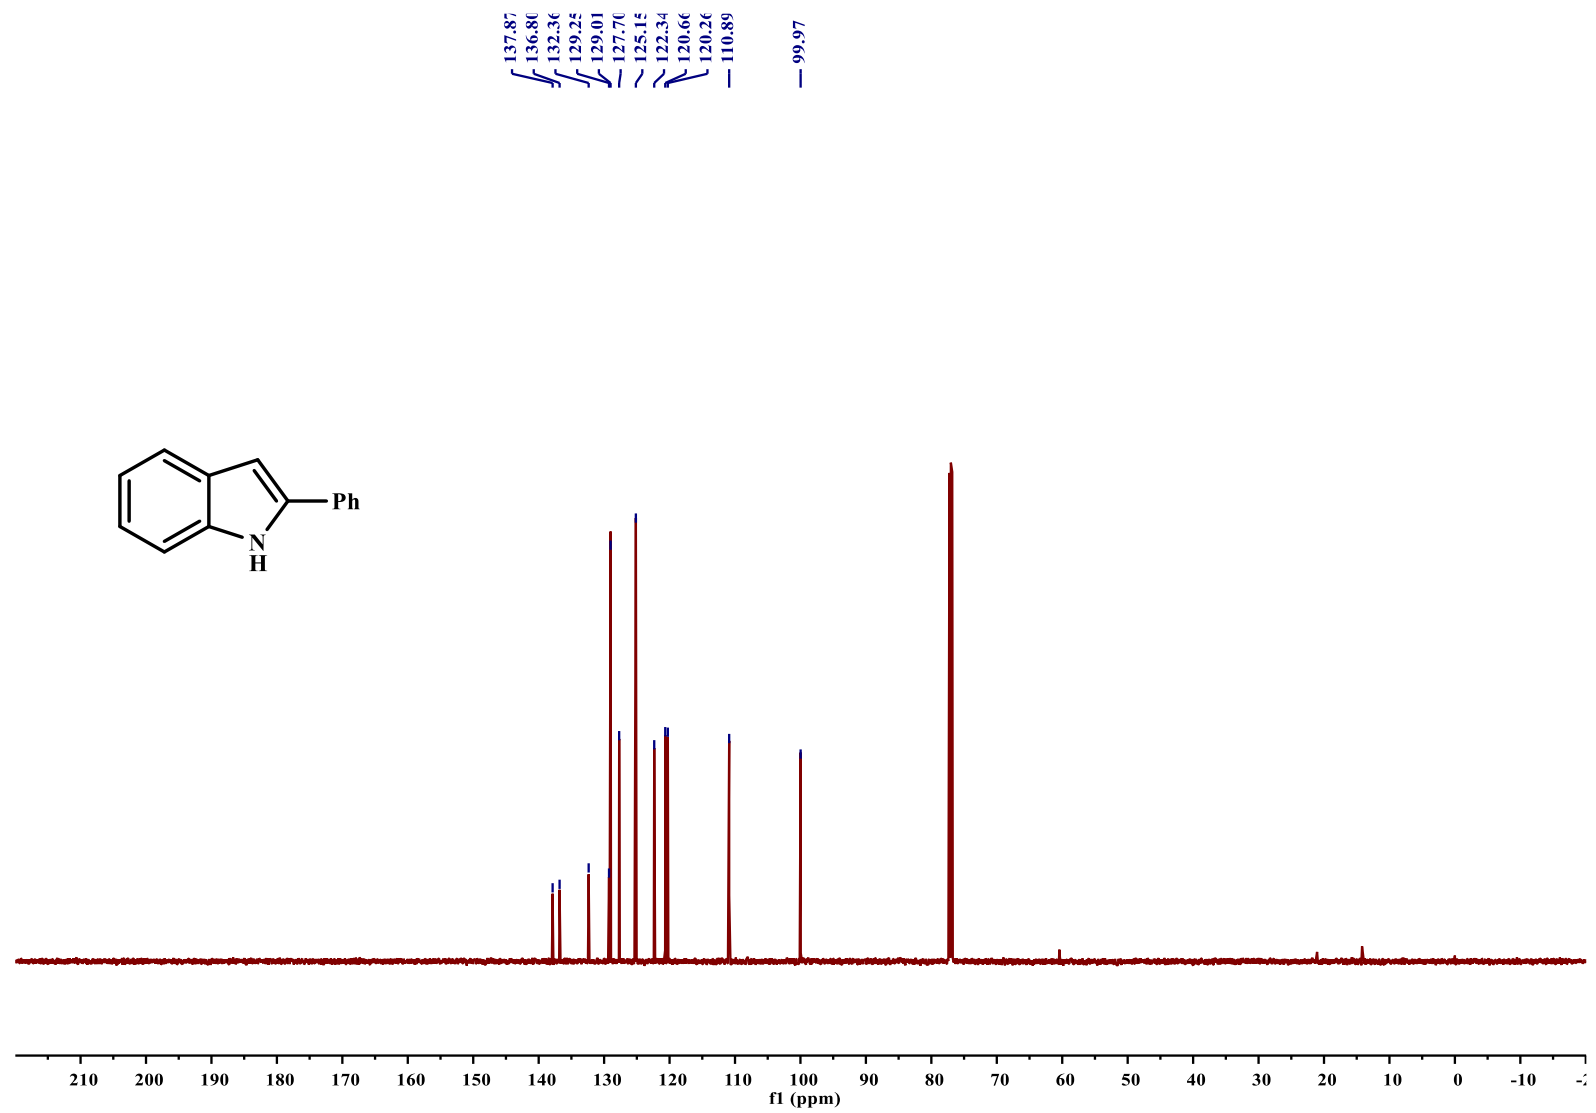

## 8. DFT calculation details

The DFT calculations were conducted by using the M06/SDD/6-31G(d,p) method in the Gaussian 16 software package.<sup>3</sup> The M06 functional<sup>4</sup> could produce accurate results for noncovalent interactions in organometallic and inorganometallic chemistry. The SDD basis set<sup>5</sup> was used to describe the heavy elements Au, and the 6-31G(d,p) basis set was used for the other atoms. Frequency analyses were also performed based on the structures obtained to confirm that the transition states had one and only one imaginary frequency. Intrinsic reaction coordinate (IRC) calculations were performed to further verify that the transition states connect the correct reactants and products. The single-point calculations were performed using M06-2x-D3 functional and the SDD basis set for heavy atoms (Au) and the def2tzvpp for other atoms with the IEFPCM model (DCE as solvent). Furthermore, according to the actual reaction temperature, the Gibbs free energies were evaluated at 353.15 K in units of kcal/mol. The 3D structures of the studied species visually were analysed by CYL view.<sup>6</sup>

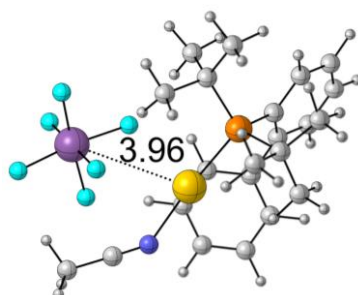

**Figure S1. The Optimized JohnphosAu(MeCN)SbF<sub>6</sub> structure**

In the structure of JohnphosAu(MeCN)SbF<sub>6</sub>, it was obviously that there was strong coordination effect between acetonitrile molecule and gold ion, and weak coordination effect between SbF<sub>6</sub><sup>-</sup> and gold ion (distance was 3.96 Å). It implies that SbF<sub>6</sub><sup>-</sup> is prone to dissociation during the reaction, hence it is reasonable to use JohnphosAu<sup>+</sup>(MeCN) as a catalyst to simplify the calculations.

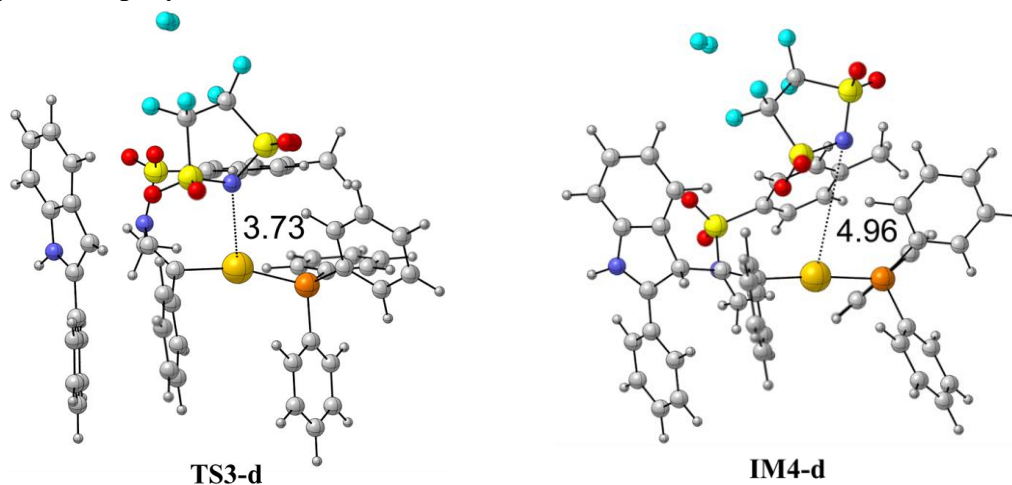

**Figure S2. The addition process of indole and ynamide catalyzed by Au(PPh<sub>3</sub>)NTf<sub>2</sub>**

In the structure of TS3-d, the distance between  $\text{NTf}_2^-$  and gold ion is 3.73 Å, furthermore, it increased to 4.96 Å in IM4-d. It meant that the  $\text{NTf}_2^-$  would not participate in the addition process of indole and ynamide. Therefore, it was justifiable to simplify following calculations by employing the  $\text{Au}^+(\text{PPh}_3)$  as catalyst.

## 7.1 Coordinates of Optimized Structures in Figure 1

RC:

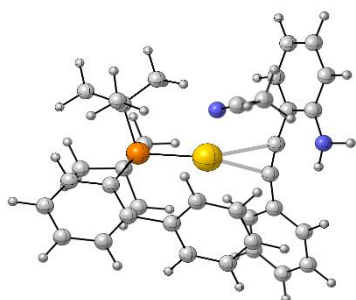

|   |             |             |             |
|---|-------------|-------------|-------------|
| C | -0.71364900 | 3.95931300  | -3.79163000 |
| C | 0.15446100  | 3.05679000  | -3.16445500 |
| C | -0.22154000 | 1.69430600  | -3.11406500 |
| C | -1.45479800 | 1.28295100  | -3.64679400 |
| C | -2.30998500 | 2.19323600  | -4.23706600 |
| C | -1.92414500 | 3.53397100  | -4.31430800 |
| H | -0.42533900 | 5.00805300  | -3.85698700 |
| H | -1.71615100 | 0.22773000  | -3.58721000 |
| H | -3.25978600 | 1.86797100  | -4.65021600 |
| H | -2.57812200 | 4.25784700  | -4.79458300 |
| C | 0.66610400  | 0.74681900  | -2.53539800 |
| C | 1.53316300  | -0.04338200 | -2.13648600 |
| C | 2.72853000  | -0.82440400 | -1.98319800 |
| C | 2.67706800  | -2.18970900 | -1.67675200 |
| C | 3.97240300  | -0.19902000 | -2.14838000 |
| C | 3.85186600  | -2.91024400 | -1.51581100 |
| H | 1.70915500  | -2.67701100 | -1.57582800 |
| C | 5.14261800  | -0.92747900 | -1.98937300 |
| H | 4.01018400  | 0.85805400  | -2.40418200 |
| C | 5.08517100  | -2.28044900 | -1.66382700 |
| H | 3.80556500  | -3.97011100 | -1.27931700 |
| H | 6.10417900  | -0.43858400 | -2.12253800 |
| H | 6.00348300  | -2.84769700 | -1.53685500 |
| N | 1.31286400  | 3.50879800  | -2.55868000 |
| H | 1.73257800  | 4.32965500  | -2.97328200 |
| H | 1.99009400  | 2.79951600  | -2.30899100 |
| C | 2.52940200  | -0.28228500 | 2.14204800  |
| C | 1.25736700  | 0.27474400  | 2.30834600  |
| C | 0.95667200  | 1.48093300  | 1.66598700  |
| C | 1.90847500  | 2.11277500  | 0.86906500  |
| C | 3.16959000  | 1.54641700  | 0.70647200  |
| C | 3.47666000  | 0.34460800  | 1.33934000  |



|    |             |             |             |
|----|-------------|-------------|-------------|
| H  | 2.77383800  | -1.21283400 | 2.65291900  |
| H  | -0.02723900 | 1.92919100  | 1.79768900  |
| H  | 1.65535600  | 3.04732600  | 0.36945200  |
| H  | 3.92012200  | 2.04488900  | 0.09557000  |
| H  | 4.45894600  | -0.10471600 | 1.20998400  |
| C  | 0.28658000  | -0.33748600 | 3.25406000  |
| C  | -0.93783100 | -0.94358000 | 2.89995500  |
| C  | 0.63171000  | -0.26256200 | 4.60976500  |
| C  | -1.77936400 | -1.40332100 | 3.92564800  |
| C  | -0.20886900 | -0.73203000 | 5.60784400  |
| H  | 1.58071100  | 0.20141000  | 4.87201400  |
| C  | -1.43218000 | -1.29443400 | 5.26422800  |
| H  | -2.73010000 | -1.86713600 | 3.67650400  |
| H  | 0.08644400  | -0.64940200 | 6.65059000  |
| H  | -2.11180400 | -1.65581700 | 6.03130300  |
| P  | -1.42527600 | -1.31940900 | 1.16839900  |
| C  | -1.13670500 | -3.18751300 | 1.00657400  |
| C  | 0.36538200  | -3.39838000 | 1.21938500  |
| C  | -1.87485000 | -4.05342700 | 2.02751300  |
| C  | -1.52426100 | -3.61955300 | -0.40792900 |
| H  | 0.97939100  | -2.80113600 | 0.53365400  |
| H  | 0.66603000  | -3.15198900 | 2.24531500  |
| H  | 0.60073000  | -4.45776900 | 1.05060600  |
| H  | -2.96292400 | -3.99532000 | 1.93976300  |
| H  | -1.59173800 | -5.09994500 | 1.85329100  |
| H  | -1.58984200 | -3.81103000 | 3.05664800  |
| H  | -1.24554300 | -4.67220300 | -0.54917400 |
| H  | -2.60387400 | -3.54470500 | -0.58594600 |
| H  | -1.00960500 | -3.02959900 | -1.17829300 |
| C  | -3.23833800 | -0.79634300 | 0.91953600  |
| C  | -3.43384400 | -0.51079600 | -0.57492600 |
| C  | -4.28285300 | -1.82761700 | 1.34719700  |
| C  | -3.45236200 | 0.50627900  | 1.69382100  |
| H  | -2.82836300 | 0.34249800  | -0.90403800 |
| H  | -3.19883600 | -1.37759600 | -1.20545900 |
| H  | -4.48835100 | -0.25548600 | -0.74608400 |
| H  | -4.22737200 | -2.10120100 | 2.40575800  |
| H  | -5.27617000 | -1.38787000 | 1.18695800  |
| H  | -4.23891600 | -2.74348100 | 0.74706900  |
| H  | -4.43570100 | 0.91148200  | 1.42034400  |
| H  | -3.44213400 | 0.35640600  | 2.77823000  |
| H  | -2.70391600 | 1.26381300  | 1.43315000  |
| N  | -1.51233300 | 2.57019600  | -0.26426200 |
| C  | -1.34667200 | 3.71175600  | -0.39631500 |
| C  | -1.11897200 | 5.13428200  | -0.55879800 |
| H  | -1.21983500 | 5.65073700  | 0.39994200  |
| H  | -0.10667600 | 5.29088200  | -0.94704300 |
| H  | -1.84094100 | 5.55428600  | -1.26497600 |
| Au | -0.10248900 | -0.29664500 | -0.51876300 |

TS1:

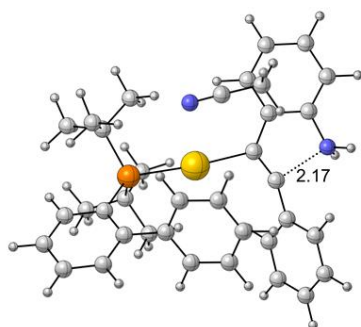

|   |             |             |             |
|---|-------------|-------------|-------------|
| C | -1.01145200 | 2.44621100  | -3.28875700 |
| C | -0.44721700 | 1.61046800  | -2.33620400 |
| C | -1.22463300 | 1.09089300  | -1.28266400 |
| C | -2.58851600 | 1.37772000  | -1.23449900 |
| C | -3.15718000 | 2.20094800  | -2.20164000 |
| C | -2.37140000 | 2.74480700  | -3.21517500 |
| H | -0.40106600 | 2.84738300  | -4.09547800 |
| H | -3.19158100 | 0.96366200  | -0.42957100 |
| H | -4.22017600 | 2.42402900  | -2.16217600 |
| H | -2.82044400 | 3.39115000  | -3.96465100 |
| C | -0.47264200 | 0.31511100  | -0.30438300 |
| C | 0.79388900  | 0.12809300  | -0.44103600 |
| C | 2.05781600  | -0.50172100 | -0.24484600 |
| C | 2.10319400  | -1.89330300 | -0.05822000 |
| C | 3.24856600  | 0.24041900  | -0.21443800 |
| C | 3.31643000  | -2.52103900 | 0.18581900  |
| H | 1.17543300  | -2.46066500 | -0.09775800 |
| C | 4.45944200  | -0.39725300 | 0.00320900  |
| H | 3.20563800  | 1.31772200  | -0.36149600 |
| C | 4.49311100  | -1.77638600 | 0.21172300  |
| H | 3.34778900  | -3.59637000 | 0.33955400  |
| H | 5.38127800  | 0.17814100  | 0.01825600  |
| H | 5.44394700  | -2.27282900 | 0.38821600  |
| N | 0.92514900  | 1.21770000  | -2.31466000 |
| H | 1.57320000  | 1.97970800  | -2.49728400 |
| H | 1.12811000  | 0.46139600  | -2.96571400 |
| C | 1.60460100  | -0.91796700 | 3.88582800  |
| C | 0.33163400  | -0.47378300 | 4.25843300  |
| C | -0.06119400 | 0.82376900  | 3.91209100  |
| C | 0.80977000  | 1.66135000  | 3.22100500  |
| C | 2.07554000  | 1.21176600  | 2.85925600  |
| C | 2.46777300  | -0.08373000 | 3.18397300  |
| H | 1.91867400  | -1.92334100 | 4.16475700  |
| H | -1.04362800 | 1.18906900  | 4.20867200  |
| H | 0.49512600  | 2.67559000  | 2.98269700  |
| H | 2.76306000  | 1.87283600  | 2.33529200  |
| H | 3.45458700  | -0.44241500 | 2.89735000  |
| C | -0.51872200 | -1.30953800 | 5.14543000  |
| C | -1.77536800 | -1.85482900 | 4.81063900  |
| C | -0.01672500 | -1.51734900 | 6.43756100  |

|    |             |             |             |
|----|-------------|-------------|-------------|
| C  | -2.49425600 | -2.53641900 | 5.80598300  |
| C  | -0.73613400 | -2.20614100 | 7.40176500  |
| H  | 0.95566100  | -1.09497600 | 6.68384200  |
| C  | -1.99410600 | -2.70653100 | 7.08839500  |
| H  | -3.46916600 | -2.95586500 | 5.57520800  |
| H  | -0.32161900 | -2.33954500 | 8.39768100  |
| H  | -2.58289200 | -3.23444700 | 7.83383200  |
| P  | -2.45905300 | -1.84295100 | 3.10347600  |
| C  | -2.31863900 | -3.64950500 | 2.53689100  |
| C  | -0.81621200 | -3.93498000 | 2.44337800  |
| C  | -2.93508600 | -4.69014500 | 3.47111400  |
| C  | -2.94616800 | -3.77512500 | 1.14807000  |
| H  | -0.31055700 | -3.26337800 | 1.73716900  |
| H  | -0.32209200 | -3.83934800 | 3.41877600  |
| H  | -0.67132200 | -4.96685200 | 2.09612300  |
| H  | -4.01127400 | -4.55818300 | 3.61610900  |
| H  | -2.78844200 | -5.68191800 | 3.02284200  |
| H  | -2.44720800 | -4.70442700 | 4.45113800  |
| H  | -2.74244800 | -4.77991500 | 0.75431100  |
| H  | -4.03568500 | -3.65163400 | 1.16988100  |
| H  | -2.52979500 | -3.04712700 | 0.43891600  |
| C  | -4.25212900 | -1.21431900 | 3.20140500  |
| C  | -4.62551300 | -0.65747400 | 1.82228600  |
| C  | -5.29903100 | -2.25587000 | 3.59574400  |
| C  | -4.27068700 | -0.05467300 | 4.20045500  |
| H  | -4.01344200 | 0.21920000  | 1.57722100  |
| H  | -4.52692900 | -1.39839800 | 1.01941100  |
| H  | -5.67451000 | -0.33259700 | 1.84728700  |
| H  | -5.13104300 | -2.69670700 | 4.58345500  |
| H  | -6.27648300 | -1.75702100 | 3.63734400  |
| H  | -5.38435300 | -3.06502300 | 2.86149000  |
| H  | -5.26332400 | 0.41410200  | 4.16873900  |
| H  | -4.08852100 | -0.38311000 | 5.22906100  |
| H  | -3.54017800 | 0.72057100  | 3.93765900  |
| N  | -2.52252800 | 2.36414600  | 2.15582800  |
| C  | -2.02113200 | 3.14268200  | 1.45476300  |
| C  | -1.37357400 | 4.09332000  | 0.57093900  |
| H  | -1.41757900 | 5.10273600  | 0.98937400  |
| H  | -0.32407200 | 3.81025600  | 0.43287700  |
| H  | -1.86746500 | 4.08877700  | -0.40720700 |
| Au | -1.28342300 | -0.57824900 | 1.44768000  |

IM1:

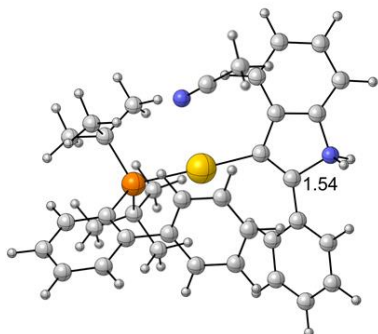

|   |             |             |             |
|---|-------------|-------------|-------------|
| C | 0.31794900  | 3.33677400  | -4.70307200 |
| C | 0.64280600  | 2.35361200  | -3.79350200 |
| C | -0.23469700 | 1.79962600  | -2.86219100 |
| C | -1.55074600 | 2.25833900  | -2.85901400 |
| C | -1.92095800 | 3.24494300  | -3.77116800 |
| C | -1.00500500 | 3.78419100  | -4.67710300 |
| H | 1.03622600  | 3.74035600  | -5.41297700 |
| H | -2.26462000 | 1.84850600  | -2.14861400 |
| H | -2.94759100 | 3.60293200  | -3.78185400 |
| H | -1.32303500 | 4.55067800  | -5.37806000 |
| C | 0.43595100  | 0.78288200  | -2.04631200 |
| C | 1.70544000  | 0.68078100  | -2.49175900 |
| C | 2.84182300  | -0.17746400 | -2.18555300 |
| C | 2.61010700  | -1.47642300 | -1.71262900 |
| C | 4.16718900  | 0.24899700  | -2.34486400 |
| C | 3.66870200  | -2.30537100 | -1.37323600 |
| H | 1.58163200  | -1.82304100 | -1.62384400 |
| C | 5.22746200  | -0.58807800 | -2.01793200 |
| H | 4.39486500  | 1.25713300  | -2.69513100 |
| C | 4.98199600  | -1.86553400 | -1.52403900 |
| H | 3.46752200  | -3.30897900 | -1.00508800 |
| H | 6.24879100  | -0.23780900 | -2.14336700 |
| H | 5.81143300  | -2.51939200 | -1.26805300 |
| N | 1.94130700  | 1.69082000  | -3.62663300 |
| H | 2.67936100  | 2.35657600  | -3.37529700 |
| H | 2.25148400  | 1.20807000  | -4.47768200 |
| C | 2.51727400  | -0.22233000 | 1.99624900  |
| C | 1.24306100  | 0.23299300  | 2.34949500  |
| C | 0.81767800  | 1.48208000  | 1.88418800  |
| C | 1.65700400  | 2.25910700  | 1.09151700  |
| C | 2.92233900  | 1.79695500  | 0.74477000  |
| C | 3.34792100  | 0.54916900  | 1.19050400  |
| H | 2.85801900  | -1.18915100 | 2.36580800  |
| H | -0.17032800 | 1.85257500  | 2.15511100  |
| H | 1.31247800  | 3.23295400  | 0.74655300  |
| H | 3.58383200  | 2.41005400  | 0.13464300  |
| H | 4.33310000  | 0.17749200  | 0.91541300  |
| C | 0.42308400  | -0.52605300 | 3.33183200  |
| C | -0.79847300 | -1.17921200 | 3.06444800  |
| C | 0.92413700  | -0.54184700 | 4.64080100  |

|    |             |             |             |
|----|-------------|-------------|-------------|
| C  | -1.48276300 | -1.77494200 | 4.13596200  |
| C  | 0.23700300  | -1.14567500 | 5.68259300  |
| H  | 1.87045600  | -0.03959000 | 4.83317200  |
| C  | -0.98586900 | -1.75533200 | 5.43083300  |
| H  | -2.42830600 | -2.27834200 | 3.95675200  |
| H  | 0.64995000  | -1.13042800 | 6.68798200  |
| H  | -1.54896500 | -2.22268000 | 6.23438000  |
| P  | -1.46154500 | -1.41995800 | 1.36292400  |
| C  | -1.13695700 | -3.25908600 | 1.01937000  |
| C  | 0.38711800  | -3.41316600 | 1.00507200  |
| C  | -1.69389600 | -4.23970900 | 2.05009200  |
| C  | -1.69433900 | -3.59860800 | -0.36351900 |
| H  | 0.86534400  | -2.75324100 | 0.27047900  |
| H  | 0.82492000  | -3.20095800 | 1.98872700  |
| H  | 0.63732400  | -4.45109900 | 0.74615800  |
| H  | -2.78424200 | -4.21066800 | 2.12983500  |
| H  | -1.41914500 | -5.25688300 | 1.73970700  |
| H  | -1.26476900 | -4.07978100 | 3.04479600  |
| H  | -1.39307400 | -4.62056400 | -0.63040200 |
| H  | -2.79051600 | -3.56823100 | -0.38880100 |
| H  | -1.31325200 | -2.92162600 | -1.14021400 |
| C  | -3.31195500 | -0.97516200 | 1.39151100  |
| C  | -3.72472500 | -0.63611400 | -0.04608500 |
| C  | -4.26403000 | -2.05420500 | 1.90671400  |
| C  | -3.45151000 | 0.29194000  | 2.23863600  |
| H  | -3.17502900 | 0.23428600  | -0.42390000 |
| H  | -3.57063900 | -1.46968600 | -0.74153000 |
| H  | -4.79487400 | -0.38822000 | -0.05573600 |
| H  | -4.06578000 | -2.36618900 | 2.93678000  |
| H  | -5.28288900 | -1.64410600 | 1.89361600  |
| H  | -4.27067700 | -2.94498100 | 1.26812300  |
| H  | -4.48026800 | 0.66439300  | 2.14151600  |
| H  | -3.26195500 | 0.10813500  | 3.30143500  |
| H  | -2.78270600 | 1.09090300  | 1.89321900  |
| N  | -1.80757800 | 2.94604300  | 0.43454600  |
| C  | -1.46748000 | 3.93863600  | -0.06266100 |
| C  | -1.03462800 | 5.16826600  | -0.70002300 |
| H  | -1.86025600 | 5.88402700  | -0.74904700 |
| H  | -0.21516800 | 5.62384900  | -0.13622700 |
| H  | -0.69437100 | 4.95617900  | -1.72039700 |
| Au | -0.40607300 | -0.18514700 | -0.40589500 |

TS2:

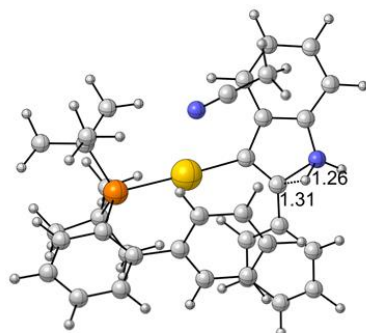

|   |             |             |             |
|---|-------------|-------------|-------------|
| C | 0.36194100  | 3.33321900  | -4.70382700 |
| C | 0.71238200  | 2.35280000  | -3.77475500 |
| C | -0.21845100 | 1.75213300  | -2.89939100 |
| C | -1.57257200 | 2.12374800  | -2.99736800 |
| C | -1.94065400 | 3.05246300  | -3.94906700 |
| C | -0.98146600 | 3.65129100  | -4.79231800 |
| H | 1.09946200  | 3.79668700  | -5.35359600 |
| H | -2.30093200 | 1.66755700  | -2.33091300 |
| H | -2.98530100 | 3.33244000  | -4.05691900 |
| H | -1.30647500 | 4.37679300  | -5.53365100 |
| C | 0.42955000  | 0.83292800  | -2.00960700 |
| C | 1.77347600  | 0.81006400  | -2.35573700 |
| C | 2.86889500  | -0.14235200 | -2.13610800 |
| C | 2.56475100  | -1.47637200 | -1.85153600 |
| C | 4.21021000  | 0.25321100  | -2.19779100 |
| C | 3.58263200  | -2.38825500 | -1.60207200 |
| H | 1.52147200  | -1.78721000 | -1.82852200 |
| C | 5.22609600  | -0.66660200 | -1.97305600 |
| H | 4.47274400  | 1.29520300  | -2.38933900 |
| C | 4.91398700  | -1.98813800 | -1.66405500 |
| H | 3.33247200  | -3.42200800 | -1.37507100 |
| H | 6.26387300  | -0.34769100 | -2.02405300 |
| H | 5.70899000  | -2.70543000 | -1.47834000 |
| N | 1.97428600  | 1.86498100  | -3.46315700 |
| H | 2.21703900  | 2.03322800  | -2.23816300 |
| H | 2.76339400  | 1.80613000  | -4.10149000 |
| C | 2.50751800  | -0.18436100 | 1.94377500  |
| C | 1.24230000  | 0.25590000  | 2.34668800  |
| C | 0.81193400  | 1.52849800  | 1.95398200  |
| C | 1.64068300  | 2.34683400  | 1.19177700  |
| C | 2.89939100  | 1.90110100  | 0.80001400  |
| C | 3.32646100  | 0.62700400  | 1.16627200  |
| H | 2.85251700  | -1.16919000 | 2.25700800  |
| H | -0.16870200 | 1.88666400  | 2.26484900  |
| H | 1.29766500  | 3.34253300  | 0.91513300  |
| H | 3.55998400  | 2.55241200  | 0.22836000  |
| H | 4.30599700  | 0.26762900  | 0.85679000  |
| C | 0.44939500  | -0.54299300 | 3.32094100  |
| C | -0.76925200 | -1.20353700 | 3.06112400  |
| C | 0.97772300  | -0.58822600 | 4.61849900  |

|    |             |             |             |
|----|-------------|-------------|-------------|
| C  | -1.42523500 | -1.83641200 | 4.12907800  |
| C  | 0.31929700  | -1.22923100 | 5.65668600  |
| H  | 1.92193800  | -0.08023500 | 4.80603900  |
| C  | -0.90146900 | -1.84661800 | 5.41334700  |
| H  | -2.36931400 | -2.34457300 | 3.95499100  |
| H  | 0.75293800  | -1.23677300 | 6.65337600  |
| H  | -1.44208900 | -2.34249900 | 6.21518300  |
| P  | -1.46836600 | -1.39420400 | 1.36963400  |
| C  | -1.17313200 | -3.22469100 | 0.96241500  |
| C  | 0.34851400  | -3.39376400 | 0.90514100  |
| C  | -1.71654100 | -4.23050300 | 1.97599800  |
| C  | -1.76804300 | -3.51539000 | -0.41604400 |
| H  | 0.81520300  | -2.72214700 | 0.17332500  |
| H  | 0.81389000  | -3.20949300 | 1.88179400  |
| H  | 0.58052400  | -4.42803900 | 0.61636200  |
| H  | -2.80344900 | -4.18599900 | 2.08976500  |
| H  | -1.46927100 | -5.24085200 | 1.62331400  |
| H  | -1.25491500 | -4.11211600 | 2.96187200  |
| H  | -1.48377800 | -4.53133300 | -0.72154000 |
| H  | -2.86410300 | -3.47412100 | -0.41342800 |
| H  | -1.39886100 | -2.81869200 | -1.18098100 |
| C  | -3.30928900 | -0.92126700 | 1.44501000  |
| C  | -3.74277800 | -0.53476500 | 0.02559000  |
| C  | -4.26408800 | -2.00154700 | 1.95170500  |
| C  | -3.41339900 | 0.32308000  | 2.33030000  |
| H  | -3.19137200 | 0.34295500  | -0.33252500 |
| H  | -3.61000100 | -1.34877400 | -0.69697000 |
| H  | -4.81030600 | -0.27626300 | 0.04221300  |
| H  | -4.04821300 | -2.33973700 | 2.97008700  |
| H  | -5.27804800 | -1.57978500 | 1.96930100  |
| H  | -4.29388600 | -2.87641300 | 1.29215200  |
| H  | -4.43886500 | 0.71116700  | 2.26579300  |
| H  | -3.20348600 | 0.10686500  | 3.38316100  |
| H  | -2.74203100 | 1.12220100  | 1.99081200  |
| N  | -1.81973000 | 2.86864200  | 0.32909200  |
| C  | -1.56379000 | 3.86463600  | -0.21026800 |
| C  | -1.23379600 | 5.10026200  | -0.89567000 |
| H  | -2.08119300 | 5.79113500  | -0.86593700 |
| H  | -0.37612000 | 5.58449900  | -0.41940500 |
| H  | -0.99085200 | 4.88932700  | -1.94372400 |
| Au | -0.41326800 | -0.13017000 | -0.37399300 |

IM2:

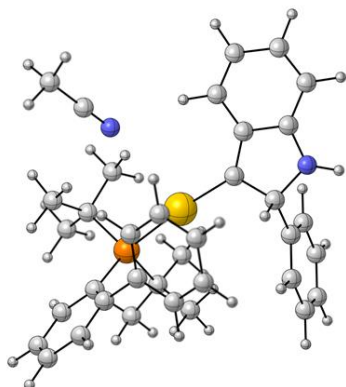

|   |             |             |             |
|---|-------------|-------------|-------------|
| C | 1.08097400  | 2.87912700  | -4.98696300 |
| C | 1.30005000  | 2.05116600  | -3.87172600 |
| C | 0.25922800  | 1.82523200  | -2.90479300 |
| C | -1.01201100 | 2.43783700  | -3.07343700 |
| C | -1.21528700 | 3.23602700  | -4.16534000 |
| C | -0.16864400 | 3.44426200  | -5.10668900 |
| H | 1.85840000  | 3.05943400  | -5.72389300 |
| H | -1.77995900 | 2.26490500  | -2.32157200 |
| H | -2.17298500 | 3.72107400  | -4.32858200 |
| H | -0.36772100 | 4.08373200  | -5.96428900 |
| C | 0.72037200  | 0.96316800  | -1.91819300 |
| C | 2.15077800  | 0.66979000  | -2.24631300 |
| C | 2.50994800  | -0.79693200 | -2.27033400 |
| C | 1.88113900  | -1.64956700 | -3.18007800 |
| C | 3.43085000  | -1.31286300 | -1.36254900 |
| C | 2.17615700  | -3.00678500 | -3.17991300 |
| H | 1.15687600  | -1.24382300 | -3.88686500 |
| C | 3.72850700  | -2.67346200 | -1.36531200 |
| H | 3.90900900  | -0.64686200 | -0.64453300 |
| C | 3.10168500  | -3.52018700 | -2.27251400 |
| H | 1.68586000  | -3.66717100 | -3.89090500 |
| H | 4.45355600  | -3.06984900 | -0.65876700 |
| H | 3.33617400  | -4.58173600 | -2.27791600 |
| N | 2.39292700  | 1.36539700  | -3.50925200 |
| H | 2.72815700  | 1.16530000  | -1.43893000 |
| H | 3.26571100  | 1.34032000  | -4.01576400 |
| C | 2.54569900  | 0.43852800  | 2.25151000  |
| C | 1.18986100  | 0.67269100  | 2.50086100  |
| C | 0.59985400  | 1.82955400  | 1.97541900  |
| C | 1.35018900  | 2.73027200  | 1.22325900  |
| C | 2.70124700  | 2.49081500  | 0.98855600  |
| C | 3.29564400  | 1.33913500  | 1.49959900  |
| H | 3.01486400  | -0.45285100 | 2.66654400  |
| H | -0.45146500 | 2.03657100  | 2.17296600  |
| H | 0.86894200  | 3.61993000  | 0.82265300  |
| H | 3.29325300  | 3.20741500  | 0.42281600  |
| H | 4.35550500  | 1.15271800  | 1.33550400  |
| C | 0.43972700  | -0.21747100 | 3.42717000  |



|    |             |             |             |
|----|-------------|-------------|-------------|
| C  | -0.67449500 | -1.01761500 | 3.09163200  |
| C  | 0.88987700  | -0.21218400 | 4.75478200  |
| C  | -1.31022300 | -1.73614500 | 4.11647700  |
| C  | 0.25215600  | -0.93764500 | 5.74942600  |
| H  | 1.75202800  | 0.40450900  | 5.00206700  |
| C  | -0.86733900 | -1.69604700 | 5.43050400  |
| H  | -2.17069100 | -2.35665500 | 3.88316600  |
| H  | 0.62266200  | -0.90220600 | 6.77068200  |
| H  | -1.39007700 | -2.26304500 | 6.19626500  |
| P  | -1.25332600 | -1.26701900 | 1.36056500  |
| C  | -0.74927400 | -3.04813800 | 0.94624100  |
| C  | 0.78253600  | -3.03919300 | 0.90461100  |
| C  | -1.19447900 | -4.11096000 | 1.94875400  |
| C  | -1.28303200 | -3.39569200 | -0.44438800 |
| H  | 1.17521600  | -2.36417500 | 0.13211700  |
| H  | 1.21618500  | -2.75137200 | 1.87154200  |
| H  | 1.13675300  | -4.05266700 | 0.67018700  |
| H  | -2.28150400 | -4.17088700 | 2.06197600  |
| H  | -0.85223900 | -5.08984500 | 1.58704800  |
| H  | -0.74682800 | -3.95781100 | 2.93643800  |
| H  | -0.85436300 | -4.35767000 | -0.75680100 |
| H  | -2.37414700 | -3.50677700 | -0.45835900 |
| H  | -0.99718100 | -2.64665900 | -1.19517200 |
| C  | -3.13189600 | -0.98170700 | 1.32740500  |
| C  | -3.51914600 | -0.64675900 | -0.11858300 |
| C  | -3.99884800 | -2.14997400 | 1.79490700  |
| C  | -3.41041400 | 0.24879900  | 2.19335200  |
| H  | -3.02150500 | 0.26625700  | -0.46938000 |
| H  | -3.28398600 | -1.45701400 | -0.81813200 |
| H  | -4.60373400 | -0.47703500 | -0.16166600 |
| H  | -3.81729300 | -2.44270300 | 2.83401700  |
| H  | -5.05187700 | -1.84352300 | 1.73392200  |
| H  | -3.88648100 | -3.03481300 | 1.15823800  |
| H  | -4.46587600 | 0.52893700  | 2.07439600  |
| H  | -3.23012700 | 0.06262700  | 3.25760300  |
| H  | -2.80564200 | 1.10952800  | 1.87858500  |
| N  | -2.08871600 | 3.04154900  | 0.18889200  |
| C  | -2.55532700 | 4.02058100  | 0.60454200  |
| C  | -3.14254300 | 5.24267300  | 1.12146400  |
| H  | -2.83012900 | 5.40608500  | 2.15671800  |
| H  | -2.82495500 | 6.09984200  | 0.52117400  |
| H  | -4.23394500 | 5.17998000  | 1.09156900  |
| Au | -0.20543000 | 0.09716600  | -0.30856100 |

**TS3:**

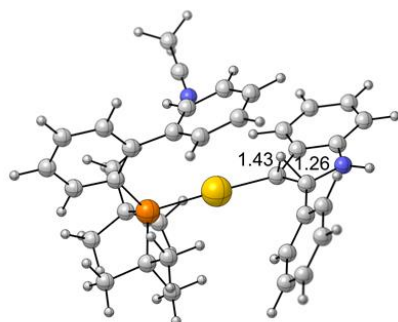

|   |             |             |             |
|---|-------------|-------------|-------------|
| C | 1.47642400  | 3.36571200  | -4.51297500 |
| C | 1.48874000  | 2.21567500  | -3.72056000 |
| C | 0.45030900  | 1.92825400  | -2.80486600 |
| C | -0.62912200 | 2.81321100  | -2.66641800 |
| C | -0.65299600 | 3.94362000  | -3.45797700 |
| C | 0.38847500  | 4.20837400  | -4.36964700 |
| H | 2.27667700  | 3.58694500  | -5.21398900 |
| H | -1.41212200 | 2.60085100  | -1.93980400 |
| H | -1.47988000 | 4.64432800  | -3.38126400 |
| H | 0.33797900  | 5.10774800  | -4.97878200 |
| C | 0.73131800  | 0.68406400  | -2.14212800 |
| C | 2.02208100  | 0.29807500  | -2.65130500 |
| C | 2.72641900  | -0.99337300 | -2.50487400 |
| C | 2.00736800  | -2.18976000 | -2.48921000 |
| C | 4.11841800  | -1.01773400 | -2.38513500 |
| C | 2.67746300  | -3.39976900 | -2.34890300 |
| H | 0.92470400  | -2.16151600 | -2.59728200 |
| C | 4.78505000  | -2.22909700 | -2.25130700 |
| H | 4.67805600  | -0.08196900 | -2.37786200 |
| C | 4.06386900  | -3.42045900 | -2.23033200 |
| H | 2.11302000  | -4.32953900 | -2.33887200 |
| H | 5.86752800  | -2.24484400 | -2.15591900 |
| H | 4.58618300  | -4.36773200 | -2.12388100 |
| N | 2.42670800  | 1.21919500  | -3.61923700 |
| H | 2.00719400  | 0.87191600  | -1.53516500 |
| H | 3.26595500  | 1.12775200  | -4.17313000 |
| C | 2.50228000  | 0.32022600  | 1.64949400  |
| C | 1.20175500  | 0.65518300  | 2.03878500  |
| C | 0.62836900  | 1.83222400  | 1.53878600  |
| C | 1.34140400  | 2.65819200  | 0.67631900  |
| C | 2.63606100  | 2.31470800  | 0.29040800  |
| C | 3.21208100  | 1.13990000  | 0.77446100  |
| H | 2.96163400  | -0.58357500 | 2.04766100  |
| H | -0.38341500 | 2.10707600  | 1.83348300  |
| H | 0.87341500  | 3.56500400  | 0.29894200  |
| H | 3.19978000  | 2.96855500  | -0.37374600 |
| H | 4.22715000  | 0.87010500  | 0.48996400  |
| C | 0.49982600  | -0.13145300 | 3.09122800  |
| C | -0.65184300 | -0.92703800 | 2.90812200  |
| C | 1.03157300  | -0.00328300 | 4.38138100  |

|    |             |             |             |
|----|-------------|-------------|-------------|
| C  | -1.24754900 | -1.50829100 | 4.03858500  |
| C  | 0.43655400  | -0.60027400 | 5.48270900  |
| H  | 1.92387700  | 0.60652100  | 4.51101300  |
| C  | -0.72382400 | -1.34525800 | 5.31286100  |
| H  | -2.14219200 | -2.11399900 | 3.92299500  |
| H  | 0.87109200  | -0.47298800 | 6.47085200  |
| H  | -1.21614000 | -1.80709300 | 6.16458300  |
| P  | -1.32859000 | -1.35368900 | 1.25030800  |
| C  | -0.91439800 | -3.19220800 | 1.03859800  |
| C  | 0.61615200  | -3.26410600 | 0.99928100  |
| C  | -1.40165500 | -4.12212500 | 2.14840700  |
| C  | -1.48023000 | -3.65989000 | -0.30322800 |
| H  | 1.04704600  | -2.65413000 | 0.19411900  |
| H  | 1.06166000  | -2.94311200 | 1.94956000  |
| H  | 0.91776400  | -4.30675000 | 0.82785600  |
| H  | -2.48935300 | -4.12188100 | 2.26699000  |
| H  | -1.10417600 | -5.14779800 | 1.89203400  |
| H  | -0.94221400 | -3.88679400 | 3.11401500  |
| H  | -1.10639800 | -4.67082000 | -0.51553100 |
| H  | -2.57570400 | -3.71552000 | -0.29661800 |
| H  | -1.17477800 | -3.00710000 | -1.13181900 |
| C  | -3.18792700 | -0.97349700 | 1.25643500  |
| C  | -3.62040300 | -0.77784100 | -0.20172600 |
| C  | -4.08631300 | -2.03694900 | 1.88561300  |
| C  | -3.36297400 | 0.35681200  | 1.99168500  |
| H  | -3.10042300 | 0.06893600  | -0.66847100 |
| H  | -3.44827800 | -1.66732400 | -0.81900700 |
| H  | -4.69739200 | -0.56316300 | -0.22453900 |
| H  | -3.85917100 | -2.23436400 | 2.93840500  |
| H  | -5.12343400 | -1.67737000 | 1.84857500  |
| H  | -4.05775200 | -2.98574100 | 1.33767800  |
| H  | -4.40514600 | 0.68428400  | 1.87663400  |
| H  | -3.15348900 | 0.27267500  | 3.06362700  |
| H  | -2.72561100 | 1.14526200  | 1.56880800  |
| N  | -2.18334400 | 3.32969700  | 0.37042900  |
| C  | -2.75578100 | 4.29841400  | 0.65683400  |
| C  | -3.47318900 | 5.50716700  | 1.01567900  |
| H  | -3.71274600 | 5.50255500  | 2.08275100  |
| H  | -2.86455400 | 6.38937000  | 0.79834300  |
| H  | -4.40582900 | 5.57654700  | 0.44873000  |
| Au | -0.27743600 | -0.21545900 | -0.56116600 |

IM3:

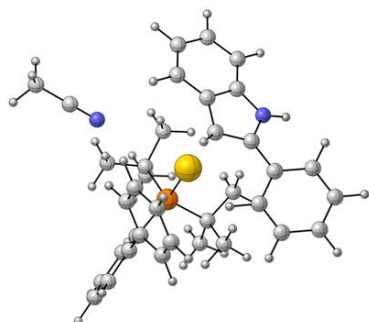

|   |             |             |             |
|---|-------------|-------------|-------------|
| C | -1.22478300 | 1.07280500  | -4.50328400 |
| C | -0.14479000 | 0.88819400  | -3.64604000 |
| C | 0.17261500  | 1.79274700  | -2.61484800 |
| C | -0.59732900 | 2.94743200  | -2.45483100 |
| C | -1.66481700 | 3.15013400  | -3.31505400 |
| C | -1.97966000 | 2.22242200  | -4.32080200 |
| H | -1.45968500 | 0.35899800  | -5.28900700 |
| H | -0.37339200 | 3.64862800  | -1.65413600 |
| H | -2.27543300 | 4.04334100  | -3.21069900 |
| H | -2.82607100 | 2.41203000  | -4.97550300 |
| C | 1.29700200  | 1.22559400  | -1.87616700 |
| C | 1.66056900  | 0.04092700  | -2.57065100 |
| C | 2.79379500  | -0.84992500 | -2.34698800 |
| C | 3.39349400  | -0.92192600 | -1.08206600 |
| C | 3.31536500  | -1.62297300 | -3.39157600 |
| C | 4.47944000  | -1.75637200 | -0.86748300 |
| H | 2.98736200  | -0.33602700 | -0.25710600 |
| C | 4.40070000  | -2.46127300 | -3.17042400 |
| H | 2.90309000  | -1.53989400 | -4.39587800 |
| C | 4.98333100  | -2.53277000 | -1.90902400 |
| H | 4.92924500  | -1.80784100 | 0.12147500  |
| H | 4.80073400  | -3.05143700 | -3.99055800 |
| H | 5.83187900  | -3.19009600 | -1.73846500 |
| N | 0.78997700  | -0.14128300 | -3.59648300 |
| H | 2.02197900  | 1.80887000  | -1.31128100 |
| H | 0.74561200  | -0.98344000 | -4.15398300 |
| C | 2.53405900  | 0.01398300  | 2.72702600  |
| C | 1.19534900  | 0.41713800  | 2.76282300  |
| C | 0.84934300  | 1.65673800  | 2.20926400  |
| C | 1.82149200  | 2.46960900  | 1.63038400  |
| C | 3.15136900  | 2.05770300  | 1.59779700  |
| C | 3.50426500  | 0.82701900  | 2.14664700  |
| H | 2.81275600  | -0.94217000 | 3.16904300  |
| H | -0.18156000 | 2.00669700  | 2.25049200  |
| H | 1.52455500  | 3.42891400  | 1.20975700  |
| H | 3.91312200  | 2.69800300  | 1.15896400  |
| H | 4.54323600  | 0.50403100  | 2.13536200  |
| C | 0.19075100  | -0.39605300 | 3.49724600  |
| C | -0.95900300 | -0.99639700 | 2.93739600  |
| C | 0.41467500  | -0.53181400 | 4.87414200  |

|    |             |             |             |
|----|-------------|-------------|-------------|
| C  | -1.85118400 | -1.66096100 | 3.79386100  |
| C  | -0.47402000 | -1.20206600 | 5.70089300  |
| H  | 1.30402000  | -0.06831900 | 5.29696900  |
| C  | -1.62554200 | -1.75951100 | 5.15898000  |
| H  | -2.74431600 | -2.12575500 | 3.38573700  |
| H  | -0.27280900 | -1.27838200 | 6.76630500  |
| H  | -2.34237700 | -2.27688000 | 5.79098400  |
| P  | -1.28051300 | -1.07796000 | 1.12937000  |
| C  | -0.95882700 | -2.88653000 | 0.66149400  |
| C  | 0.54160000  | -3.11078300 | 0.87714600  |
| C  | -1.71960700 | -3.91849000 | 1.49340800  |
| C  | -1.28685000 | -3.07814800 | -0.81985600 |
| H  | 1.15558400  | -2.46905800 | 0.23121800  |
| H  | 0.83599500  | -2.93522100 | 1.91995500  |
| H  | 0.78113600  | -4.15530300 | 0.63714200  |
| H  | -2.80669000 | -3.81929800 | 1.41635600  |
| H  | -1.45829900 | -4.91894900 | 1.12395900  |
| H  | -1.43739900 | -3.88149100 | 2.55076000  |
| H  | -0.96389000 | -4.08188900 | -1.12670000 |
| H  | -2.36187600 | -3.00616500 | -1.02435200 |
| H  | -0.76258800 | -2.34895500 | -1.45461800 |
| C  | -3.06199100 | -0.49986800 | 0.80392200  |
| C  | -3.15066500 | -0.03591600 | -0.65660300 |
| C  | -4.14821200 | -1.54957300 | 1.03854400  |
| C  | -3.30547500 | 0.71176400  | 1.70611000  |
| H  | -2.50265100 | 0.82861400  | -0.85408600 |
| H  | -2.89443400 | -0.82622400 | -1.37229700 |
| H  | -4.18484100 | 0.27193000  | -0.86216800 |
| H  | -4.17992600 | -1.92564100 | 2.06610600  |
| H  | -5.12345300 | -1.08364700 | 0.84425400  |
| H  | -4.06063400 | -2.40299000 | 0.35657100  |
| H  | -4.27509600 | 1.15384800  | 1.44022600  |
| H  | -3.33855500 | 0.44432400  | 2.76777600  |
| H  | -2.54253500 | 1.48845800  | 1.56116800  |
| N  | -1.36397100 | 3.63625300  | 0.78376600  |
| C  | -1.84591200 | 4.65555600  | 1.06169200  |
| C  | -2.44866200 | 5.92837900  | 1.40976400  |
| H  | -2.75395800 | 5.92763300  | 2.45992000  |
| H  | -1.73405200 | 6.74158400  | 1.25467600  |
| H  | -3.32994000 | 6.11338900  | 0.78923900  |
| Au | 0.13923600  | 0.20679600  | -0.24998300 |

## 7.2 Coordinates of Optimized Structures in Figure 2

IM3:

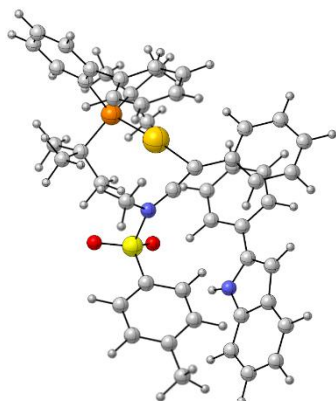

|   |             |             |             |
|---|-------------|-------------|-------------|
| C | 0.58581300  | -5.93211400 | -3.52843500 |
| C | -0.14209700 | -5.30102500 | -2.52017600 |
| C | -1.55531900 | -5.19735100 | -2.55528600 |
| C | -2.24725600 | -5.74099500 | -3.64910300 |
| C | -1.52859000 | -6.37200200 | -4.65095400 |
| C | -0.12571300 | -6.46804000 | -4.58986200 |
| H | 1.66998900  | -6.00614100 | -3.48087900 |
| H | -3.33263600 | -5.68231200 | -3.69805700 |
| H | -2.05469600 | -6.81307700 | -5.49449000 |
| H | 0.40918100  | -6.97955700 | -5.38675300 |
| C | -1.94847200 | -4.51608600 | -1.36311200 |
| C | -0.80692300 | -4.23523800 | -0.64458800 |
| C | -0.65536900 | -3.63164400 | 0.67558500  |
| C | 0.55088500  | -3.04495600 | 1.07631000  |
| C | -1.71914100 | -3.66376800 | 1.58759000  |
| C | 0.68478300  | -2.50273600 | 2.34819200  |
| H | 1.38389200  | -2.97836700 | 0.38139800  |
| C | -1.58572300 | -3.11120500 | 2.85372400  |
| H | -2.65105000 | -4.14855400 | 1.30337900  |
| C | -0.38227900 | -2.52616500 | 3.24241200  |
| H | 1.64173300  | -2.07547800 | 2.64227400  |
| H | -2.42227500 | -3.15345300 | 3.54768000  |
| H | -0.27060400 | -2.11121500 | 4.24302600  |
| N | 0.28619200  | -4.68269900 | -1.36802200 |
| H | -2.95860400 | -4.26880700 | -1.05846400 |
| H | 1.23259700  | -4.69827100 | -1.02016200 |
| C | -4.27057100 | -0.87974600 | 2.15141000  |
| C | -3.06369700 | -0.33681000 | 1.73031800  |
| C | -2.59769700 | -0.56818500 | 0.43111300  |
| C | -3.35464400 | -1.37111500 | -0.43444800 |
| C | -4.55649000 | -1.91751700 | -0.00883300 |
| C | -5.01844600 | -1.66963300 | 1.28306900  |
| H | -4.62691200 | -0.69106400 | 3.16105900  |
| H | -2.46522300 | 0.27601400  | 2.40466300  |
| H | -2.98131500 | -1.57328600 | -1.43792800 |

|    |             |             |             |
|----|-------------|-------------|-------------|
| H  | -5.13953000 | -2.53610700 | -0.68748500 |
| H  | -5.96388100 | -2.09377900 | 1.61194300  |
| C  | -1.36300500 | 0.03610000  | -0.03184000 |
| C  | -0.70783700 | 0.17534500  | -1.11001600 |
| N  | 0.00894300  | 0.43075300  | -2.15470700 |
| S  | 1.47780800  | -0.53005000 | -2.47798300 |
| O  | 2.50857600  | 0.46054800  | -2.72826700 |
| O  | 1.54504500  | -1.45421300 | -1.36413100 |
| C  | 1.02364800  | -1.34968700 | -3.95961100 |
| C  | 1.67589800  | -1.03447100 | -5.14866600 |
| C  | 0.01585100  | -2.31309300 | -3.89420800 |
| C  | 1.31164500  | -1.72156600 | -6.29942600 |
| H  | 2.46065400  | -0.28216200 | -5.15894100 |
| C  | -0.33513000 | -2.97447600 | -5.05779200 |
| H  | -0.47401000 | -2.55190000 | -2.94883200 |
| C  | 0.30991900  | -2.69587900 | -6.26980100 |
| H  | 1.81990500  | -1.50526200 | -7.23701500 |
| H  | -1.10492300 | -3.74499200 | -5.02385800 |
| C  | -0.08510700 | -3.43997100 | -7.50586600 |
| H  | 0.68351600  | -3.37988100 | -8.28194600 |
| H  | -0.27222700 | -4.49586700 | -7.27986700 |
| H  | -1.01304300 | -3.03268000 | -7.92627300 |
| C  | -0.15265200 | 1.63954700  | -2.97717200 |
| H  | -0.01016600 | 1.37830800  | -4.03061100 |
| H  | -1.16436800 | 2.01920800  | -2.82594700 |
| H  | 0.58220700  | 2.39507000  | -2.68161800 |
| C  | -0.93455600 | 4.36271500  | -0.31810500 |
| C  | -0.74306900 | 4.23166300  | 1.06073200  |
| C  | -1.75463800 | 3.63908000  | 1.82631000  |
| C  | -2.92195300 | 3.17890200  | 1.22379400  |
| C  | -3.09799000 | 3.30553400  | -0.15149400 |
| C  | -2.10285800 | 3.90220100  | -0.91945400 |
| H  | -0.16233100 | 4.84856300  | -0.91451400 |
| H  | -1.63576900 | 3.56834300  | 2.90677400  |
| H  | -3.70404900 | 2.73092100  | 1.83275200  |
| H  | -4.01640100 | 2.95609900  | -0.61698100 |
| H  | -2.24850600 | 4.03946900  | -1.98949400 |
| C  | 0.44424500  | 4.86271600  | 1.69588200  |
| C  | 1.49126600  | 4.19188900  | 2.36577200  |
| C  | 0.48664100  | 6.26123600  | 1.61037600  |
| C  | 2.51434900  | 4.96485500  | 2.94097300  |
| C  | 1.51018200  | 7.00339500  | 2.17891600  |
| H  | -0.32645100 | 6.76747800  | 1.09359600  |
| C  | 2.52965400  | 6.34932900  | 2.85842800  |
| H  | 3.32908200  | 4.47667700  | 3.46505100  |
| H  | 1.50651700  | 8.08719500  | 2.09708800  |
| H  | 3.33881500  | 6.90966200  | 3.31913300  |
| P  | 1.68044800  | 2.35993100  | 2.40037300  |
| Au | 0.01799900  | 1.16733000  | 1.20042900  |
| C  | 3.29361300  | 1.98381300  | 1.46279800  |

|   |             |             |             |
|---|-------------|-------------|-------------|
| C | 3.18114900  | 2.74358400  | 0.13653800  |
| C | 4.58142700  | 2.38696300  | 2.17839200  |
| C | 3.36081000  | 0.48370300  | 1.15476500  |
| H | 2.26917800  | 2.47108800  | -0.41540800 |
| H | 3.19301600  | 3.83099700  | 0.27483100  |
| H | 4.03273600  | 2.47095600  | -0.50012400 |
| H | 4.71021600  | 1.86579000  | 3.13441300  |
| H | 5.43202000  | 2.10527300  | 1.54374900  |
| H | 4.65775000  | 3.46533400  | 2.34649400  |
| H | 4.23416500  | 0.30285400  | 0.51411600  |
| H | 3.48341400  | -0.12674400 | 2.05586700  |
| H | 2.47925200  | 0.11912900  | 0.61135400  |
| C | 1.66928900  | 1.84605100  | 4.22242500  |
| C | 2.04044600  | 0.36798000  | 4.31611700  |
| C | 2.57674900  | 2.65431300  | 5.14833300  |
| C | 0.22162600  | 2.02441900  | 4.69026500  |
| H | 1.44928100  | -0.24239400 | 3.62286300  |
| H | 3.10531900  | 0.19319400  | 4.12235900  |
| H | 1.83380700  | 0.01372400  | 5.33512000  |
| H | 2.26122600  | 3.69920700  | 5.23081300  |
| H | 2.51444300  | 2.21723800  | 6.15376800  |
| H | 3.63067300  | 2.62461100  | 4.85012300  |
| H | 0.15423800  | 1.74902200  | 5.75113600  |
| H | -0.11199600 | 3.06651900  | 4.60055300  |
| H | -0.47304800 | 1.38079400  | 4.13211100  |

**TS4:**

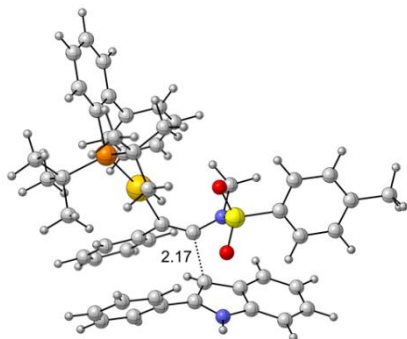

|   |            |             |             |
|---|------------|-------------|-------------|
| C | 6.08002200 | -7.63017700 | -6.99144100 |
| C | 5.80044800 | -6.85413800 | -5.87254900 |
| C | 4.77441100 | -5.88855500 | -5.84830600 |
| C | 4.02946300 | -5.66265800 | -7.00667000 |
| C | 4.30077000 | -6.42600400 | -8.13473900 |
| C | 5.30640800 | -7.40364500 | -8.12425400 |
| H | 6.86523600 | -8.38202600 | -6.98270900 |
| H | 3.24110200 | -4.91174100 | -7.01825000 |
| H | 3.71828200 | -6.27349500 | -9.03973500 |
| H | 5.48432000 | -7.99743700 | -9.01750800 |
| C | 4.77123100 | -5.29974800 | -4.52799500 |
| C | 5.75964300 | -5.98579500 | -3.79418300 |
| C | 6.16474500 | -5.81540900 | -2.39858100 |
| C | 7.50405200 | -5.55312300 | -2.08283600 |



|   |            |             |              |
|---|------------|-------------|--------------|
| C | 5.21360500 | -5.90205500 | -1.37875400  |
| C | 7.87880500 | -5.37603400 | -0.75658200  |
| H | 8.23067600 | -5.44171300 | -2.88593800  |
| C | 5.60066000 | -5.74925100 | -0.05275300  |
| H | 4.17045400 | -6.09274400 | -1.62914500  |
| C | 6.93033000 | -5.48095400 | 0.25936600   |
| H | 8.91677300 | -5.15750100 | -0.51429700  |
| H | 4.85805000 | -5.83047000 | 0.73750500   |
| H | 7.23066000 | -5.35538400 | 1.29722600   |
| N | 6.37761200 | -6.87023400 | -4.60769100  |
| H | 3.90003100 | -4.85445700 | -4.05763400  |
| H | 7.19044800 | -7.40783700 | -4.33868000  |
| C | 3.12994700 | -2.96911200 | -0.33839500  |
| C | 4.25146500 | -2.86040700 | -1.14814200  |
| C | 4.12679700 | -2.86524300 | -2.54425500  |
| C | 2.84135900 | -2.94525000 | -3.10197100  |
| C | 1.71775800 | -3.04020700 | -2.28743800  |
| C | 1.85835900 | -3.05637200 | -0.90354000  |
| H | 3.24701500 | -2.98314100 | 0.74306900   |
| H | 5.24634400 | -2.80139000 | -0.70634200  |
| H | 2.73166700 | -2.90519400 | -4.18636100  |
| H | 0.72927700 | -3.09690700 | -2.73673800  |
| H | 0.98100500 | -3.12984900 | -0.26617200  |
| C | 5.27610000 | -2.68037000 | -3.42480400  |
| C | 5.69428700 | -3.33998000 | -4.47332300  |
| N | 6.26896600 | -3.09107500 | -5.66604200  |
| S | 7.97423700 | -3.38010000 | -5.83337200  |
| O | 8.66004300 | -2.15216600 | -5.45151200  |
| O | 8.22626100 | -4.62010000 | -5.11813200  |
| C | 8.15447100 | -3.58669800 | -7.57615500  |
| C | 8.87927100 | -2.64146600 | -8.29803300  |
| C | 7.57445700 | -4.69117100 | -8.19226700  |
| C | 9.02371600 | -2.82025300 | -9.66685600  |
| H | 9.31744600 | -1.78775000 | -7.78805500  |
| C | 7.72579800 | -4.84525100 | -9.56085500  |
| H | 7.01625500 | -5.41903300 | -7.60986400  |
| C | 8.45396600 | -3.91945900 | -10.31681500 |
| H | 9.58844400 | -2.09255000 | -10.24661400 |
| H | 7.27030100 | -5.70291800 | -10.05412600 |
| C | 8.63902300 | -4.11645900 | -11.78872500 |
| H | 8.79861500 | -3.16597000 | -12.30702300 |
| H | 9.51567000 | -4.74589100 | -11.98664400 |
| H | 7.77534000 | -4.61493800 | -12.24015900 |
| C | 5.77541300 | -1.91247300 | -6.39666100  |
| H | 6.15311100 | -1.93125300 | -7.42325100  |
| H | 4.68338900 | -1.96880800 | -6.41955300  |
| H | 6.07990100 | -0.98561600 | -5.88985900  |
| C | 5.60135700 | 1.80803800  | -4.52814800  |
| C | 5.75128100 | 1.80070400  | -3.13793200  |
| C | 4.75630400 | 1.19974200  | -2.35724100  |

|    |             |             |             |
|----|-------------|-------------|-------------|
| C  | 3.64571800  | 0.60866000  | -2.95274100 |
| C  | 3.51033700  | 0.61739800  | -4.33803600 |
| C  | 4.48928500  | 1.21889700  | -5.12357200 |
| H  | 6.36248100  | 2.29161900  | -5.13974800 |
| H  | 4.84508900  | 1.21547400  | -1.27219000 |
| H  | 2.88434300  | 0.14186300  | -2.33005800 |
| H  | 2.63592400  | 0.16554400  | -4.80200900 |
| H  | 4.38123100  | 1.24428800  | -6.20632300 |
| C  | 6.87401900  | 2.55341600  | -2.51562300 |
| C  | 7.94217000  | 1.99854600  | -1.77594000 |
| C  | 6.82313300  | 3.94381600  | -2.68393100 |
| C  | 8.88420600  | 2.87310900  | -1.20907600 |
| C  | 7.77119100  | 4.78792500  | -2.12614200 |
| H  | 5.99696400  | 4.36028300  | -3.25722300 |
| C  | 8.80542300  | 4.24857200  | -1.37209600 |
| H  | 9.70855400  | 2.47297100  | -0.62758300 |
| H  | 7.69620800  | 5.86234400  | -2.27289900 |
| H  | 9.55361800  | 4.89145700  | -0.91593300 |
| P  | 8.23690900  | 0.18663200  | -1.62701400 |
| Au | 6.66246300  | -1.20479800 | -2.75134900 |
| C  | 9.92579900  | -0.15064600 | -2.42700600 |
| C  | 9.82458900  | 0.47378600  | -3.82367400 |
| C  | 11.15155400 | 0.41111900  | -1.71010900 |
| C  | 10.10920600 | -1.66660200 | -2.56536900 |
| H  | 8.95386200  | 0.10258100  | -4.37983500 |
| H  | 9.77939700  | 1.56856100  | -3.78039100 |
| H  | 10.71743000 | 0.19382800  | -4.39856000 |
| H  | 11.28656300 | -0.01710500 | -0.71018100 |
| H  | 12.04154700 | 0.14090700  | -2.29432000 |
| H  | 11.14401600 | 1.50255800  | -1.63512100 |
| H  | 10.99332400 | -1.85037600 | -3.19049100 |
| H  | 10.28409200 | -2.15273000 | -1.59934200 |
| H  | 9.25969800  | -2.15337500 | -3.05764400 |
| C  | 8.13653400  | -0.21766600 | 0.22298200  |
| C  | 8.45426100  | -1.70117000 | 0.42116100  |
| C  | 9.03577000  | 0.61483500  | 1.13617500  |
| C  | 6.68271300  | 0.04286800  | 0.62920300  |
| H  | 7.90469700  | -2.34754100 | -0.27735600 |
| H  | 9.52514300  | -1.90950100 | 0.31257900  |
| H  | 8.17021900  | -1.99120500 | 1.44234800  |
| H  | 8.75079400  | 1.67182700  | 1.14371300  |
| H  | 8.92108900  | 0.24369300  | 2.16358100  |
| H  | 10.09822900 | 0.53786900  | 0.88256500  |
| H  | 6.56465700  | -0.19509400 | 1.69492700  |
| H  | 6.40689000  | 1.09699600  | 0.49655300  |
| H  | 5.97391900  | -0.57720300 | 0.06479600  |

**IM4:**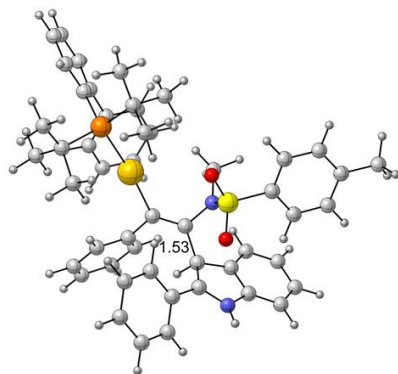

|   |             |             |             |
|---|-------------|-------------|-------------|
| C | -1.89687700 | -5.28257800 | -3.70718000 |
| C | -1.70444000 | -4.57970100 | -2.52973800 |
| C | -2.07342500 | -3.24840800 | -2.35788700 |
| C | -2.65664300 | -2.56308500 | -3.41016800 |
| C | -2.86207000 | -3.24310900 | -4.61026700 |
| C | -2.48851600 | -4.58121900 | -4.75619400 |
| H | -1.60009800 | -6.32255100 | -3.81486400 |
| H | -2.93741600 | -1.51704800 | -3.30211600 |
| H | -3.31798500 | -2.72429300 | -5.44919100 |
| H | -2.66145200 | -5.08628300 | -5.70259000 |
| C | -1.70970400 | -2.82183200 | -0.97020800 |
| C | -1.00688900 | -4.04104500 | -0.43274800 |
| C | -0.49705700 | -4.29073400 | 0.90106000  |
| C | 0.22284000  | -3.31766700 | 1.61230300  |
| C | -0.73168000 | -5.54537700 | 1.49040900  |
| C | 0.70094900  | -3.60911000 | 2.88104100  |
| H | 0.43985400  | -2.35673800 | 1.15425400  |
| C | -0.25959500 | -5.82092000 | 2.76349300  |
| H | -1.33448900 | -6.28926600 | 0.97169300  |
| C | 0.46171800  | -4.85310900 | 3.45832500  |
| H | 1.27457900  | -2.85884900 | 3.42000600  |
| H | -0.46125400 | -6.78658800 | 3.21846200  |
| H | 0.83699300  | -5.07056700 | 4.45507700  |
| N | -1.10705700 | -5.01044800 | -1.32422600 |
| H | -2.62704700 | -2.77954000 | -0.34901800 |
| H | -0.67729100 | -5.91993700 | -1.19495200 |
| C | -3.49257800 | -1.12499100 | 3.29922000  |
| C | -2.36278600 | -0.98488100 | 2.50380700  |
| C | -2.47062000 | -0.86982800 | 1.10925400  |
| C | -3.75971900 | -0.87923200 | 0.54953100  |
| C | -4.89191900 | -1.00873000 | 1.34804800  |
| C | -4.76364600 | -1.13290700 | 2.72738900  |
| H | -3.38222400 | -1.21898800 | 4.37725200  |
| H | -1.37446900 | -0.95625400 | 2.96276100  |
| H | -3.86326300 | -0.74707000 | -0.52879700 |
| H | -5.87852500 | -1.00212800 | 0.88993400  |
| H | -5.64624300 | -1.22739000 | 3.35466300  |
| C | -1.29738300 | -0.64397600 | 0.24652700  |
| C | -1.03734400 | -1.46199400 | -0.79351100 |

|    |             |             |             |
|----|-------------|-------------|-------------|
| N  | -0.15034800 | -1.10666500 | -1.86692200 |
| S  | 1.38229000  | -1.78931300 | -1.88994200 |
| O  | 2.37437700  | -0.90791600 | -1.28070000 |
| O  | 1.19882300  | -3.14012500 | -1.35018200 |
| C  | 1.73369100  | -1.89246700 | -3.62270500 |
| C  | 2.73751300  | -1.10011100 | -4.16832100 |
| C  | 0.99180600  | -2.76861100 | -4.41209800 |
| C  | 2.99755100  | -1.19169900 | -5.53015000 |
| H  | 3.30092000  | -0.42737700 | -3.52643300 |
| C  | 1.26301400  | -2.84221900 | -5.76872300 |
| H  | 0.21429800  | -3.38451500 | -3.96578800 |
| C  | 2.26967300  | -2.05993400 | -6.34737800 |
| H  | 3.78066800  | -0.57716100 | -5.97052100 |
| H  | 0.68535400  | -3.52015600 | -6.39591900 |
| C  | 2.57569800  | -2.17288000 | -7.80856600 |
| H  | 3.01951800  | -1.25252800 | -8.20053000 |
| H  | 3.29176400  | -2.98339300 | -7.99347000 |
| H  | 1.67705900  | -2.39689900 | -8.39248700 |
| C  | -0.23574800 | 0.24155600  | -2.42649700 |
| H  | 0.18168500  | 0.24121200  | -3.44039500 |
| H  | -1.29414400 | 0.51523000  | -2.47574300 |
| H  | 0.27923300  | 0.99695200  | -1.81756500 |
| C  | -1.33826000 | 3.87027800  | -0.70643900 |
| C  | -1.15807500 | 3.84117700  | 0.67871400  |
| C  | -2.09116900 | 3.15794900  | 1.46797400  |
| C  | -3.17591400 | 2.51237600  | 0.88383400  |
| C  | -3.34271800 | 2.54351700  | -0.49807800 |
| C  | -2.42179600 | 3.22038000  | -1.29167800 |
| H  | -0.62825500 | 4.42149800  | -1.32235200 |
| H  | -1.97238400 | 3.15503000  | 2.55107100  |
| H  | -3.89055900 | 1.98100600  | 1.50998600  |
| H  | -4.19859500 | 2.04827800  | -0.95214600 |
| H  | -2.55578700 | 3.26186200  | -2.37080700 |
| C  | -0.08817300 | 4.66144400  | 1.30889100  |
| C  | 1.06909600  | 4.16899000  | 1.95052500  |
| C  | -0.30434800 | 6.04563700  | 1.27141700  |
| C  | 1.92835300  | 5.09420800  | 2.56652100  |
| C  | 0.56386200  | 6.94113100  | 1.87650900  |
| H  | -1.19699000 | 6.41066100  | 0.76671800  |
| C  | 1.68383600  | 6.45951500  | 2.54229700  |
| H  | 2.82538900  | 4.74564700  | 3.06738400  |
| H  | 0.36093300  | 8.00830500  | 1.83606900  |
| H  | 2.37261900  | 7.14115100  | 3.03456500  |
| P  | 1.53758300  | 2.38425600  | 1.94179400  |
| Au | -0.02388700 | 0.88533300  | 0.90822700  |
| C  | 3.17745500  | 2.29481300  | 0.99381200  |
| C  | 2.79802000  | 2.52997000  | -0.47270700 |
| C  | 4.24479800  | 3.31666300  | 1.38154300  |
| C  | 3.75388700  | 0.88556200  | 1.13891100  |
| H  | 2.18968100  | 1.70698200  | -0.86600800 |

|   |             |             |             |
|---|-------------|-------------|-------------|
| H | 2.25892800  | 3.47705000  | -0.61307100 |
| H | 3.71730000  | 2.57882700  | -1.07240200 |
| H | 4.52909500  | 3.26743200  | 2.43855100  |
| H | 5.14865200  | 3.10243400  | 0.79535900  |
| H | 3.94211800  | 4.34214000  | 1.14607300  |
| H | 4.55573400  | 0.75703100  | 0.39919600  |
| H | 4.19709000  | 0.72432700  | 2.12931400  |
| H | 3.01091300  | 0.10391100  | 0.93767700  |
| C | 1.68402000  | 1.85626500  | 3.76360900  |
| C | 1.75377600  | 0.32639400  | 3.83363500  |
| C | 2.87561200  | 2.42436800  | 4.53203200  |
| C | 0.38291900  | 2.30275600  | 4.43623200  |
| H | 0.90061400  | -0.14136000 | 3.32511300  |
| H | 2.67190100  | -0.07630700 | 3.39371100  |
| H | 1.72963700  | 0.02337600  | 4.88971900  |
| H | 2.84899300  | 3.51528900  | 4.61359500  |
| H | 2.84944200  | 2.03149800  | 5.55764900  |
| H | 3.83594200  | 2.12343400  | 4.09788400  |
| H | 0.38057600  | 1.95166200  | 5.47693600  |
| H | 0.27398000  | 3.39357100  | 4.45117500  |
| H | -0.49747700 | 1.87178800  | 3.93909900  |

**TS4-a:**

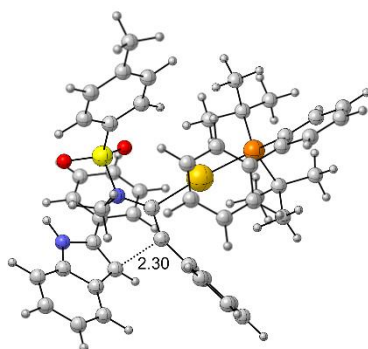

|   |            |             |             |
|---|------------|-------------|-------------|
| C | 3.47595600 | -7.65941600 | -7.12494600 |
| C | 4.15774600 | -7.04781500 | -6.07881500 |
| C | 3.56206500 | -6.07791300 | -5.24714800 |
| C | 2.22879200 | -5.71811400 | -5.46426300 |
| C | 1.54074400 | -6.32043300 | -6.50854600 |
| C | 2.15690500 | -7.27729200 | -7.32954200 |
| H | 3.95437800 | -8.40618500 | -7.75470500 |
| H | 1.74370700 | -4.98065200 | -4.82698500 |
| H | 0.50245100 | -6.05521400 | -6.69124100 |
| H | 1.58809500 | -7.73447400 | -8.13502600 |
| C | 4.58604100 | -5.62030800 | -4.33754700 |
| C | 5.74273000 | -6.37032900 | -4.62383000 |
| C | 7.04204500 | -6.32199400 | -3.97740900 |
| C | 7.99169900 | -7.33327100 | -4.17604500 |
| C | 7.37584700 | -5.23862700 | -3.15195400 |
| C | 9.24260800 | -7.25179400 | -3.58229300 |
| H | 7.74703600 | -8.20239800 | -4.78305100 |
| C | 8.62442600 | -5.16166400 | -2.55641200 |

|   |             |             |              |
|---|-------------|-------------|--------------|
| H | 6.65958200  | -4.43212500 | -3.01228300  |
| C | 9.56484300  | -6.16550700 | -2.77417800  |
| H | 9.96780000  | -8.04451900 | -3.74529600  |
| H | 8.86769500  | -4.31249000 | -1.92123500  |
| H | 10.54555400 | -6.10538400 | -2.30919800  |
| N | 5.47075800  | -7.21769100 | -5.65720900  |
| H | 4.39475500  | -5.18333100 | -3.36547900  |
| H | 6.20123500  | -7.61240100 | -6.24019300  |
| C | 3.28052000  | -1.78439800 | -2.22074300  |
| C | 4.21047700  | -2.58642200 | -2.86413100  |
| C | 4.20288900  | -2.69169400 | -4.26477600  |
| C | 3.22584800  | -2.00017100 | -5.00088600  |
| C | 2.29207300  | -1.20589600 | -4.35057600  |
| C | 2.32030100  | -1.09537100 | -2.96210600  |
| H | 3.29684500  | -1.69824000 | -1.13738200  |
| H | 4.96067100  | -3.12527300 | -2.28705200  |
| H | 3.23340900  | -2.08902200 | -6.08640300  |
| H | 1.54082000  | -0.67036400 | -4.92611000  |
| H | 1.58809500  | -0.47377700 | -2.45286100  |
| C | 5.16303300  | -3.48591500 | -4.98109300  |
| C | 6.02455300  | -3.48184800 | -5.95025800  |
| N | 6.32197300  | -4.49508000 | -6.85565800  |
| S | 7.92969000  | -4.92211200 | -7.19846800  |
| O | 8.72016100  | -4.44033800 | -6.07938700  |
| O | 7.84552100  | -6.33734100 | -7.54217500  |
| C | 8.40383600  | -4.03963600 | -8.65938900  |
| C | 9.05715000  | -2.81696000 | -8.52659700  |
| C | 8.11317700  | -4.56750400 | -9.91605800  |
| C | 9.41141400  | -2.11324800 | -9.66968900  |
| H | 9.29791000  | -2.44117300 | -7.53372700  |
| C | 8.46590900  | -3.84415300 | -11.04696800 |
| H | 7.63902200  | -5.54206500 | -10.00181600 |
| C | 9.11968000  | -2.61128800 | -10.94374400 |
| H | 9.93817800  | -1.16338200 | -9.57776000  |
| H | 8.24614000  | -4.24839900 | -12.03347200 |
| C | 9.53556000  | -1.86438000 | -12.17235000 |
| H | 8.83834400  | -2.03000000 | -12.99969400 |
| H | 9.60217700  | -0.78761500 | -11.98812900 |
| H | 10.52404500 | -2.19869400 | -12.51119700 |
| C | 5.34453600  | -4.72227400 | -7.92515000  |
| H | 5.41941500  | -3.95246600 | -8.70732700  |
| H | 5.51038200  | -5.71151000 | -8.36066500  |
| H | 4.34043400  | -4.70175100 | -7.49013000  |
| C | 4.82070800  | 0.92120500  | -7.24990900  |
| C | 6.20808900  | 0.90843100  | -7.41528600  |
| C | 6.77753500  | -0.05964200 | -8.24980600  |
| C | 5.98028300  | -0.99956100 | -8.89684700  |
| C | 4.59895900  | -0.98202100 | -8.71885500  |
| C | 4.02282300  | -0.02005900 | -7.89403100  |
| H | 4.36672100  | 1.68453000  | -6.61882900  |

|    |             |             |             |
|----|-------------|-------------|-------------|
| H  | 7.85542100  | -0.05882100 | -8.41115200 |
| H  | 6.44859200  | -1.73655900 | -9.54961900 |
| H  | 3.97081400  | -1.70509600 | -9.23544500 |
| H  | 2.94254700  | 0.01110800  | -7.76406300 |
| C  | 7.04216400  | 1.99485300  | -6.83342500 |
| C  | 7.98525600  | 1.84992900  | -5.79236300 |
| C  | 6.86732600  | 3.25858500  | -7.41304300 |
| C  | 8.73473000  | 2.97452900  | -5.41142700 |
| C  | 7.61539600  | 4.35736400  | -7.01815400 |
| H  | 6.13297400  | 3.35956700  | -8.21009000 |
| C  | 8.56698400  | 4.21151700  | -6.01645600 |
| H  | 9.46252000  | 2.89009800  | -4.60990400 |
| H  | 7.46024900  | 5.32116000  | -7.49613600 |
| H  | 9.17074200  | 5.05689800  | -5.69731300 |
| P  | 8.17886600  | 0.29994700  | -4.81879400 |
| Au | 7.04733400  | -1.63130700 | -5.62576200 |
| C  | 10.03116700 | -0.10848000 | -4.69526500 |
| C  | 10.61492700 | 0.10963200  | -6.09320700 |
| C  | 10.83595400 | 0.69495400  | -3.67326200 |
| C  | 10.16471300 | -1.59341700 | -4.33129100 |
| H  | 10.04043100 | -0.42422100 | -6.86293300 |
| H  | 10.65021500 | 1.16851400  | -6.37169200 |
| H  | 11.64027900 | -0.28206700 | -6.11641500 |
| H  | 10.50019000 | 0.51471800  | -2.64589200 |
| H  | 11.88295400 | 0.36801300  | -3.72825100 |
| H  | 10.83490000 | 1.77360000  | -3.85736500 |
| H  | 11.23264000 | -1.84630300 | -4.28752600 |
| H  | 9.73409100  | -1.82429900 | -3.35031600 |
| H  | 9.69444900  | -2.26219000 | -5.06258200 |
| C  | 7.37157700  | 0.68985600  | -3.14664200 |
| C  | 7.56585300  | -0.50535100 | -2.21216500 |
| C  | 7.87553900  | 1.96151000  | -2.46618500 |
| C  | 5.87746100  | 0.86276600  | -3.43883700 |
| H  | 7.26321800  | -1.45163600 | -2.68256300 |
| H  | 8.60364900  | -0.60410500 | -1.87132600 |
| H  | 6.94209100  | -0.36086700 | -1.31914600 |
| H  | 7.66547100  | 2.85646200  | -3.06139800 |
| H  | 7.34488200  | 2.07534100  | -1.51144500 |
| H  | 8.94602400  | 1.93486200  | -2.23983000 |
| H  | 5.35730800  | 1.09221900  | -2.49860100 |
| H  | 5.69148500  | 1.69340600  | -4.13183000 |
| H  | 5.42553400  | -0.04699700 | -3.85688900 |

IM4-a:

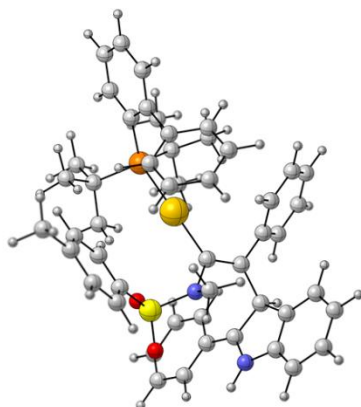

|   |             |             |             |
|---|-------------|-------------|-------------|
| C | -4.41139400 | -5.30292700 | -0.27828200 |
| C | -3.31047800 | -4.62364500 | 0.21491600  |
| C | -3.37663900 | -3.36933700 | 0.81654300  |
| C | -4.60932800 | -2.74060500 | 0.92826400  |
| C | -5.73560500 | -3.40041800 | 0.43622700  |
| C | -5.64104200 | -4.66126200 | -0.15328200 |
| H | -4.32637900 | -6.28707300 | -0.73153300 |
| H | -4.70310200 | -1.76743000 | 1.40516100  |
| H | -6.70931700 | -2.92658300 | 0.52427600  |
| H | -6.53823000 | -5.15353400 | -0.52091000 |
| C | -1.99225500 | -2.99881100 | 1.29920600  |
| C | -1.16943500 | -4.19182500 | 0.89314000  |
| C | 0.17972500  | -4.51548500 | 1.27034100  |
| C | 0.82249600  | -5.64826100 | 0.74070900  |
| C | 0.86907300  | -3.69071400 | 2.17263200  |
| C | 2.11862000  | -5.95116800 | 1.10889600  |
| H | 0.33852100  | -6.26783000 | -0.01233400 |
| C | 2.16688300  | -4.00310400 | 2.54097400  |
| H | 0.39332100  | -2.79107500 | 2.55960000  |
| C | 2.79149600  | -5.12840700 | 2.01117800  |
| H | 2.61652400  | -6.81521800 | 0.67918200  |
| H | 2.70138800  | -3.35589300 | 3.22975800  |
| H | 3.81451600  | -5.36209300 | 2.29382800  |
| N | -1.96863400 | -5.05706200 | 0.28136200  |
| H | -2.00283700 | -3.02815400 | 2.40536200  |
| H | -1.66946300 | -5.98079300 | -0.00725000 |
| C | -3.49521400 | 0.40326500  | 3.49650200  |
| C | -2.60009600 | -0.51202400 | 2.95217100  |
| C | -2.35784600 | -0.54480800 | 1.57427000  |
| C | -3.03549100 | 0.37006400  | 0.75627000  |
| C | -3.93438800 | 1.28220000  | 1.29834900  |
| C | -4.17464200 | 1.29530700  | 2.66925600  |
| H | -3.66829000 | 0.41668300  | 4.56997800  |
| H | -2.07653800 | -1.20553100 | 3.61245200  |
| H | -2.85757600 | 0.34423900  | -0.31835800 |
| H | -4.45368200 | 1.98004800  | 0.64472800  |
| H | -4.88623800 | 1.99874700  | 3.09470200  |
| C | -1.50997600 | -1.58275200 | 0.93838500  |



|    |             |             |             |
|----|-------------|-------------|-------------|
| C  | -0.52495400 | -1.25799700 | 0.06770000  |
| N  | -0.07556400 | -2.32912400 | -0.78126300 |
| S  | 1.58478800  | -2.48508300 | -1.14837900 |
| O  | 2.30888100  | -1.95210300 | -0.00439700 |
| O  | 1.72703000  | -3.87396500 | -1.56877600 |
| C  | 1.95910800  | -1.48742800 | -2.57187500 |
| C  | 2.52252400  | -0.22516300 | -2.40536100 |
| C  | 1.73821400  | -2.00760200 | -3.84657500 |
| C  | 2.84816600  | 0.52465100  | -3.52833600 |
| H  | 2.71771500  | 0.14701100  | -1.40174800 |
| C  | 2.05529400  | -1.23793900 | -4.95733400 |
| H  | 1.34902300  | -3.01585800 | -3.96262800 |
| C  | 2.61497700  | 0.03635600  | -4.81789000 |
| H  | 3.30482100  | 1.50727200  | -3.40724700 |
| H  | 1.88518300  | -1.63816900 | -5.95528600 |
| C  | 2.99702100  | 0.84072800  | -6.02147900 |
| H  | 4.05037300  | 0.67501300  | -6.27981600 |
| H  | 2.40066800  | 0.56521800  | -6.89671000 |
| H  | 2.87265800  | 1.91397300  | -5.84446200 |
| C  | -0.95319200 | -2.62405200 | -1.91884400 |
| H  | -1.98505200 | -2.68417800 | -1.56065000 |
| H  | -0.90997000 | -1.83785000 | -2.68882300 |
| H  | -0.67120100 | -3.58797500 | -2.35716700 |
| C  | -2.06421700 | 3.20535800  | -1.59519500 |
| C  | -0.66724500 | 3.24538700  | -1.61381400 |
| C  | 0.02091000  | 2.28646900  | -2.36299900 |
| C  | -0.66681500 | 1.30622900  | -3.07161600 |
| C  | -2.05802900 | 1.27179700  | -3.04032500 |
| C  | -2.75430400 | 2.22337200  | -2.29978300 |
| H  | -2.60944000 | 3.95934800  | -1.02790400 |
| H  | 1.10821300  | 2.32868100  | -2.41301500 |
| H  | -0.10476800 | 0.57748100  | -3.65597700 |
| H  | -2.59972600 | 0.51463600  | -3.60340600 |
| H  | -3.84253300 | 2.21051100  | -2.28217100 |
| C  | 0.05987200  | 4.37850500  | -0.98363500 |
| C  | 0.98832000  | 4.28403700  | 0.07676300  |
| C  | -0.19614300 | 5.63678800  | -1.54672700 |
| C  | 1.64721000  | 5.45496700  | 0.48406900  |
| C  | 0.46027200  | 6.78109900  | -1.12096200 |
| H  | -0.91633200 | 5.69598300  | -2.36076000 |
| C  | 1.40305000  | 6.68693800  | -0.10522700 |
| H  | 2.36357600  | 5.41173300  | 1.29849500  |
| H  | 0.24376000  | 7.73862800  | -1.58776200 |
| H  | 1.94001500  | 7.56747700  | 0.23777200  |
| P  | 1.24595600  | 2.74500700  | 1.06493200  |
| Au | 0.31031700  | 0.66828700  | 0.26428500  |
| C  | 3.12241700  | 2.51353400  | 1.30670000  |
| C  | 3.77884800  | 2.79325800  | -0.04700200 |
| C  | 3.79453900  | 3.36739300  | 2.38319000  |
| C  | 3.36452000  | 1.04402300  | 1.67612300  |

|   |             |            |             |
|---|-------------|------------|-------------|
| H | 3.30272700  | 2.22338800 | -0.85674500 |
| H | 3.74424100  | 3.85411200 | -0.31771800 |
| H | 4.83284700  | 2.48795800 | -0.00445300 |
| H | 3.41809000  | 3.13995500 | 3.38669500  |
| H | 4.86760700  | 3.13203500 | 2.38469900  |
| H | 3.71156800  | 4.44548000 | 2.21661000  |
| H | 4.44543600  | 0.88647800 | 1.79404700  |
| H | 2.88726400  | 0.77024400 | 2.62433000  |
| H | 3.00375100  | 0.34294000 | 0.91451400  |
| C | 0.34789600  | 3.12670800 | 2.69533000  |
| C | 0.55676700  | 1.95370400 | 3.65481700  |
| C | 0.73980500  | 4.43063300 | 3.38793300  |
| C | -1.13447400 | 3.21535600 | 2.32701400  |
| H | 0.31296700  | 0.98983700 | 3.18648500  |
| H | 1.58404300  | 1.90636500 | 4.03684700  |
| H | -0.10788900 | 2.08143900 | 4.52054800  |
| H | 0.51793300  | 5.30723600 | 2.77016200  |
| H | 0.14172600  | 4.52257800 | 4.30475400  |
| H | 1.79219700  | 4.46858700 | 3.68421400  |
| H | -1.71777900 | 3.40491000 | 3.23882400  |
| H | -1.33252500 | 4.03941000 | 1.62868300  |
| H | -1.50556000 | 2.28611900 | 1.87990100  |

**TS5:**

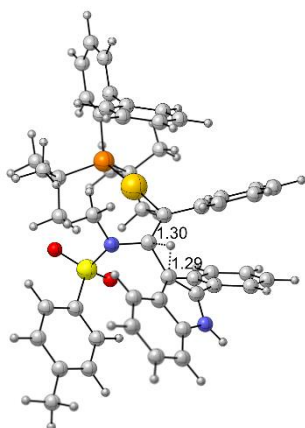

|   |             |             |             |
|---|-------------|-------------|-------------|
| C | -1.72603800 | -5.19936900 | -3.83513000 |
| C | -1.52343800 | -4.36165900 | -2.74280000 |
| C | -1.34556400 | -2.97231400 | -2.86947500 |
| C | -1.40562500 | -2.39125500 | -4.13931700 |
| C | -1.60104500 | -3.21745500 | -5.23438400 |
| C | -1.75656200 | -4.60470000 | -5.08680700 |
| H | -1.85731400 | -6.27148100 | -3.71147900 |
| H | -1.27085200 | -1.31971100 | -4.26964600 |
| H | -1.62982200 | -2.78321100 | -6.23088600 |
| H | -1.91182600 | -5.22234000 | -5.96766900 |
| C | -1.15529200 | -2.45962500 | -1.51765200 |
| C | -1.20141600 | -3.56131700 | -0.64496600 |
| C | -0.97882900 | -3.68255100 | 0.79429400  |
| C | 0.17361100  | -3.13843200 | 1.37475800  |
| C | -1.88442700 | -4.40405700 | 1.57874900  |

|   |             |             |             |
|---|-------------|-------------|-------------|
| C | 0.41339800  | -3.33474300 | 2.72883900  |
| H | 0.88191500  | -2.58585300 | 0.75739500  |
| C | -1.64250200 | -4.58094300 | 2.93611000  |
| H | -2.79370000 | -4.79958500 | 1.12739500  |
| C | -0.49112900 | -4.05130400 | 3.51037800  |
| H | 1.32162400  | -2.93514800 | 3.17487000  |
| H | -2.35250900 | -5.13532300 | 3.54440500  |
| H | -0.29484700 | -4.20135400 | 4.56918000  |
| N | -1.44753200 | -4.66931300 | -1.39213800 |
| H | -1.97235200 | -1.45991400 | -1.49058100 |
| H | -1.44211500 | -5.60289500 | -1.00272700 |
| C | -3.34243600 | -1.31212500 | 2.98460600  |
| C | -2.23539300 | -0.93107600 | 2.24163800  |
| C | -2.31305100 | -0.80319400 | 0.84439900  |
| C | -3.56517100 | -0.99578800 | 0.23442800  |
| C | -4.67975700 | -1.35268500 | 0.98301600  |
| C | -4.56987900 | -1.52585500 | 2.35955200  |
| H | -3.25078500 | -1.43202200 | 4.06154600  |
| H | -1.28032700 | -0.75234400 | 2.73428200  |
| H | -3.68665300 | -0.79715100 | -0.83240700 |
| H | -5.64142500 | -1.47801000 | 0.49147200  |
| H | -5.44231800 | -1.80147400 | 2.94637400  |
| C | -1.14010500 | -0.39777800 | 0.07166000  |
| C | -0.81825500 | -0.99085400 | -1.13575600 |
| N | -0.01524700 | -0.35831100 | -2.11370700 |
| S | 1.64417300  | -0.74003000 | -2.14666200 |
| O | 2.33893100  | 0.51751700  | -2.38315400 |
| O | 1.90702700  | -1.54971500 | -0.96349800 |
| C | 1.84330200  | -1.76207500 | -3.57649100 |
| C | 1.98678700  | -1.16024000 | -4.82268500 |
| C | 1.78630900  | -3.14727700 | -3.44057000 |
| C | 2.04921400  | -1.96618900 | -5.95262600 |
| H | 2.07241700  | -0.07885600 | -4.90100300 |
| C | 1.85592700  | -3.93311800 | -4.57971800 |
| H | 1.69530200  | -3.59186900 | -2.45165100 |
| C | 1.97204400  | -3.35699400 | -5.84960700 |
| H | 2.16609100  | -1.50933500 | -6.93360500 |
| H | 1.81072000  | -5.01775700 | -4.49079400 |
| C | 1.99575100  | -4.22738300 | -7.06715400 |
| H | 2.22897000  | -3.65829500 | -7.97172500 |
| H | 2.73488300  | -5.03042400 | -6.97026600 |
| H | 1.01987100  | -4.70805000 | -7.21534700 |
| C | -0.41968000 | 0.94613400  | -2.63683400 |
| H | 0.09472200  | 1.14029500  | -3.58260200 |
| H | -1.49876000 | 0.90972000  | -2.82707900 |
| H | -0.21415700 | 1.76984800  | -1.93946100 |
| C | -1.43745800 | 4.18895900  | -0.10386000 |
| C | -1.24493200 | 3.91924900  | 1.25370500  |
| C | -2.13427400 | 3.05603000  | 1.90457200  |
| C | -3.18869600 | 2.47041000  | 1.21017000  |

|    |             |             |             |
|----|-------------|-------------|-------------|
| C  | -3.36629600 | 2.73914400  | -0.14416700 |
| C  | -2.48752400 | 3.59613100  | -0.80027500 |
| H  | -0.76618400 | 4.88302300  | -0.60851400 |
| H  | -2.00367700 | 2.86021600  | 2.96895800  |
| H  | -3.87445600 | 1.80406100  | 1.73012400  |
| H  | -4.19868900 | 2.29029000  | -0.68250100 |
| H  | -2.63086400 | 3.82379800  | -1.85464800 |
| C  | -0.21559900 | 4.67042200  | 2.02625200  |
| C  | 1.04632800  | 4.18237200  | 2.42620200  |
| C  | -0.57956200 | 5.97625500  | 2.38044300  |
| C  | 1.87336300  | 5.02459300  | 3.18771500  |
| C  | 0.25351500  | 6.79157700  | 3.13118400  |
| H  | -1.55304400 | 6.34207500  | 2.05899700  |
| C  | 1.48849700  | 6.30819600  | 3.54531000  |
| H  | 2.85240300  | 4.67724200  | 3.50248100  |
| H  | -0.06235000 | 7.79787700  | 3.39414700  |
| H  | 2.15602000  | 6.92782600  | 4.13836200  |
| P  | 1.67619800  | 2.51902300  | 1.94563100  |
| Au | 0.09028300  | 1.09286300  | 0.85854700  |
| C  | 3.13222500  | 2.84256800  | 0.78157300  |
| C  | 2.50343100  | 3.38277600  | -0.50668900 |
| C  | 4.15675300  | 3.86119600  | 1.27821100  |
| C  | 3.83339200  | 1.51605900  | 0.48564700  |
| H  | 1.85850800  | 2.63998500  | -0.99067600 |
| H  | 1.92884300  | 4.30115500  | -0.32595400 |
| H  | 3.30592600  | 3.62535900  | -1.21614400 |
| H  | 4.62213700  | 3.57957400  | 2.22892200  |
| H  | 4.96019600  | 3.92642400  | 0.53241800  |
| H  | 3.72774800  | 4.86363800  | 1.37983200  |
| H  | 4.53099600  | 1.66698900  | -0.34883300 |
| H  | 4.42016200  | 1.16105600  | 1.34189400  |
| H  | 3.13680200  | 0.72727200  | 0.17660800  |
| C  | 2.16924900  | 1.62276500  | 3.54921700  |
| C  | 2.27466900  | 0.12134500  | 3.25088400  |
| C  | 3.48132800  | 2.07097200  | 4.19136100  |
| C  | 1.01546300  | 1.83513600  | 4.53252200  |
| H  | 1.32150700  | -0.29213000 | 2.89654600  |
| H  | 3.03819000  | -0.11476100 | 2.50173900  |
| H  | 2.54556200  | -0.39998000 | 4.17986800  |
| H  | 3.47907100  | 3.12292300  | 4.49253200  |
| H  | 3.63897200  | 1.48320100  | 5.10587400  |
| H  | 4.34578400  | 1.89148700  | 3.54230100  |
| H  | 1.19145600  | 1.22153300  | 5.42631700  |
| H  | 0.92619400  | 2.87884300  | 4.85367500  |
| H  | 0.05278900  | 1.52484700  | 4.10175900  |

**IM5:**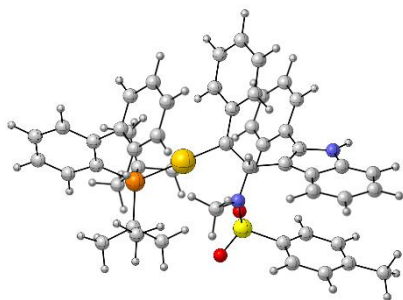

|   |             |             |             |
|---|-------------|-------------|-------------|
| C | -1.79293200 | -5.03041000 | -4.06364400 |
| C | -1.49761400 | -4.21556100 | -2.97235300 |
| C | -1.40485800 | -2.81169500 | -3.07821200 |
| C | -1.64157300 | -2.20584700 | -4.31877500 |
| C | -1.95100800 | -3.00667300 | -5.40491700 |
| C | -2.02094000 | -4.40460400 | -5.27931400 |
| H | -1.85451000 | -6.11170000 | -3.96348600 |
| H | -1.56352300 | -1.12500800 | -4.43418100 |
| H | -2.13759300 | -2.55079700 | -6.37409200 |
| H | -2.26624200 | -5.00657000 | -6.15108500 |
| C | -1.08007600 | -2.30860400 | -1.77164600 |
| C | -1.00201200 | -3.39495300 | -0.92130000 |
| C | -0.82521600 | -3.52180900 | 0.53254200  |
| C | 0.27730500  | -2.98282100 | 1.20381300  |
| C | -1.80267600 | -4.20981100 | 1.26456000  |
| C | 0.39140500  | -3.13419000 | 2.58370200  |
| H | 1.04804600  | -2.46108900 | 0.64096000  |
| C | -1.68865400 | -4.34523100 | 2.64216400  |
| H | -2.67178000 | -4.61355600 | 0.74614700  |
| C | -0.58766000 | -3.80794600 | 3.30602800  |
| H | 1.26554300  | -2.73557000 | 3.09451200  |
| H | -2.45815400 | -4.87436000 | 3.19931500  |
| H | -0.48920900 | -3.92650800 | 4.38237100  |
| N | -1.26282300 | -4.53547500 | -1.65366900 |
| H | -1.91215300 | -0.40387000 | -1.98064700 |
| H | -1.19254100 | -5.46763300 | -1.27300000 |
| C | -3.62680000 | -1.02043900 | 2.70301800  |
| C | -2.48887400 | -0.64983300 | 2.00620800  |
| C | -2.40460200 | -0.80433200 | 0.60242000  |
| C | -3.54066100 | -1.31309500 | -0.07920400 |
| C | -4.69338000 | -1.62751500 | 0.61185200  |
| C | -4.73346300 | -1.49426400 | 2.00402100  |
| H | -3.66172400 | -0.92198600 | 3.78440800  |
| H | -1.62028900 | -0.25756200 | 2.53407300  |
| H | -3.52070700 | -1.44346800 | -1.15887300 |
| H | -5.56725400 | -1.98825700 | 0.07624900  |
| H | -5.64024300 | -1.75997600 | 2.54266100  |
| C | -1.19413200 | -0.41676700 | -0.05785600 |
| C | -1.01046600 | -0.83217400 | -1.48882400 |
| N | 0.07537900  | -0.14975100 | -2.20770500 |
| S | 1.67137200  | -0.66509300 | -2.13536900 |

|    |             |             |             |
|----|-------------|-------------|-------------|
| O  | 2.45910300  | 0.45650900  | -2.63112700 |
| O  | 1.92578800  | -1.20052400 | -0.79972600 |
| C  | 1.80077000  | -2.00228500 | -3.28508900 |
| C  | 1.70391500  | -1.71955100 | -4.64508600 |
| C  | 1.95380500  | -3.30431100 | -2.82367600 |
| C  | 1.73194700  | -2.76786200 | -5.55074300 |
| H  | 1.60838700  | -0.69028800 | -4.98628100 |
| C  | 1.97723500  | -4.34079000 | -3.74679300 |
| H  | 2.04361300  | -3.49498100 | -1.75710500 |
| C  | 1.84923500  | -4.09215400 | -5.11562300 |
| H  | 1.65037500  | -2.56287900 | -6.61678800 |
| H  | 2.09079200  | -5.36715200 | -3.40082500 |
| C  | 1.79553300  | -5.22165800 | -6.09556800 |
| H  | 2.21311300  | -4.93734300 | -7.06669600 |
| H  | 2.33674400  | -6.10110500 | -5.73251100 |
| H  | 0.75265400  | -5.52324500 | -6.26405000 |
| C  | -0.22943600 | 1.14887200  | -2.79433200 |
| H  | 0.60492900  | 1.48169500  | -3.41337000 |
| H  | -1.12574800 | 1.06580400  | -3.42493400 |
| H  | -0.40916000 | 1.91267600  | -2.02246800 |
| C  | -1.46479800 | 3.59953700  | 0.18780600  |
| C  | -1.43853900 | 3.59793700  | 1.58708500  |
| C  | -2.51282100 | 3.02519900  | 2.27677200  |
| C  | -3.58321900 | 2.46242600  | 1.58803400  |
| C  | -3.60361300 | 2.47592300  | 0.19616200  |
| C  | -2.54194000 | 3.04447400  | -0.50129800 |
| H  | -0.65262300 | 4.07593900  | -0.36074900 |
| H  | -2.50822200 | 3.04109400  | 3.36644000  |
| H  | -4.41434800 | 2.02916200  | 2.14041600  |
| H  | -4.45267000 | 2.05951900  | -0.34167200 |
| H  | -2.56269300 | 3.08345100  | -1.58902800 |
| C  | -0.39707200 | 4.34682700  | 2.34231100  |
| C  | 0.97009500  | 4.01095900  | 2.45279400  |
| C  | -0.86040300 | 5.50672000  | 2.97933400  |
| C  | 1.80829500  | 4.87636100  | 3.17591300  |
| C  | -0.01598000 | 6.34178300  | 3.69421100  |
| H  | -1.91581400 | 5.75588300  | 2.88632600  |
| C  | 1.33386500  | 6.02797100  | 3.78607800  |
| H  | 2.86313100  | 4.64344000  | 3.27623500  |
| H  | -0.41012700 | 7.23564700  | 4.17071600  |
| H  | 2.01728400  | 6.67027600  | 4.33513200  |
| P  | 1.68596500  | 2.42145100  | 1.85290300  |
| Au | 0.12228400  | 0.92392500  | 0.80450600  |
| C  | 3.07332300  | 2.84622400  | 0.63738000  |
| C  | 2.36780300  | 3.33477100  | -0.63100200 |
| C  | 4.04507300  | 3.93477800  | 1.09023800  |
| C  | 3.85412100  | 1.56954500  | 0.32186900  |
| H  | 1.74708400  | 2.55151300  | -1.08215800 |
| H  | 1.75268800  | 4.22444700  | -0.43792900 |
| H  | 3.12706800  | 3.61055700  | -1.37467600 |

|   |            |             |             |
|---|------------|-------------|-------------|
| H | 4.55916400 | 3.69348800  | 2.02709600  |
| H | 4.81826000 | 4.03916200  | 0.31757500  |
| H | 3.55828200 | 4.91027900  | 1.19312000  |
| H | 4.50416700 | 1.76180400  | -0.54177900 |
| H | 4.49966700 | 1.26832100  | 1.15590500  |
| H | 3.20623900 | 0.72816600  | 0.04939600  |
| C | 2.28814100 | 1.52084200  | 3.41646800  |
| C | 2.46900000 | 0.03701200  | 3.07550100  |
| C | 3.58979100 | 2.04195000  | 4.02205000  |
| C | 1.15850100 | 1.64289900  | 4.44331500  |
| H | 1.52825200 | -0.41788300 | 2.73779600  |
| H | 3.22131000 | -0.13866000 | 2.29950000  |
| H | 2.79412000 | -0.49255500 | 3.98211900  |
| H | 3.52400000 | 3.08500700  | 4.34676300  |
| H | 3.82008400 | 1.44724800  | 4.91633000  |
| H | 4.44008700 | 1.93584900  | 3.33888500  |
| H | 1.38916000 | 0.99844700  | 5.30208300  |
| H | 1.03842900 | 2.66704700  | 4.81376200  |
| H | 0.19362900 | 1.31365800  | 4.03038300  |

**TS5-a:**

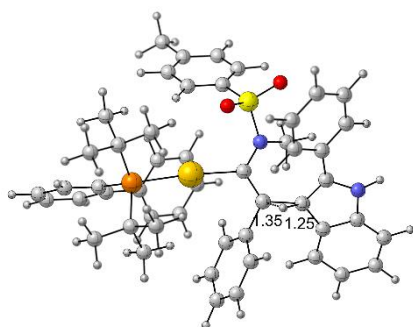

|   |             |             |            |
|---|-------------|-------------|------------|
| C | -4.67953200 | -5.54389200 | 0.76403100 |
| C | -3.49227600 | -4.82513600 | 0.82659100 |
| C | -3.43804600 | -3.42241600 | 0.80731500 |
| C | -4.63125000 | -2.70354200 | 0.69381300 |
| C | -5.82449800 | -3.40894600 | 0.62758600 |
| C | -5.85164000 | -4.80905300 | 0.66828800 |
| H | -4.68836200 | -6.63072300 | 0.78456000 |
| H | -4.63265700 | -1.61731500 | 0.66749300 |
| H | -6.76016300 | -2.86254000 | 0.54477800 |
| H | -6.80498400 | -5.32814400 | 0.61874400 |
| C | -2.02273400 | -3.05464300 | 0.86549800 |
| C | -1.29128700 | -4.28068300 | 0.93966300 |
| C | 0.12319800  | -4.58172600 | 1.13470600 |
| C | 0.64415900  | -5.78095600 | 0.62458300 |
| C | 0.96619100  | -3.73308600 | 1.86281900 |
| C | 1.96850900  | -6.12453000 | 0.84636100 |
| H | 0.02009100  | -6.42743100 | 0.00843000 |
| C | 2.28889500  | -4.08463700 | 2.08746800 |
| H | 0.59609000  | -2.79037800 | 2.26458600 |
| C | 2.79227900  | -5.27954100 | 1.58353000 |

|   |             |             |             |
|---|-------------|-------------|-------------|
| H | 2.36313400  | -7.04731200 | 0.43029400  |
| H | 2.93193600  | -3.41234300 | 2.64837000  |
| H | 3.83169900  | -5.54639100 | 1.75422000  |
| N | -2.18774800 | -5.29721800 | 0.89926500  |
| H | -1.42146300 | -2.43954500 | 1.77517000  |
| H | -1.93456000 | -6.25725200 | 1.09086900  |
| C | -3.66516600 | 0.32128500  | 3.14570000  |
| C | -2.76675100 | -0.61083100 | 2.64165800  |
| C | -2.37321400 | -0.57787400 | 1.29803800  |
| C | -2.88874800 | 0.43076200  | 0.47764000  |
| C | -3.78401200 | 1.36917500  | 0.98274600  |
| C | -4.18385100 | 1.31150900  | 2.31396400  |
| H | -3.96359800 | 0.27349800  | 4.19003900  |
| H | -2.37833800 | -1.38639400 | 3.30455300  |
| H | -2.59679500 | 0.46395200  | -0.57098300 |
| H | -4.17480800 | 2.14401800  | 0.32593800  |
| H | -4.89433500 | 2.03551500  | 2.70503500  |
| C | -1.48196900 | -1.61811900 | 0.70981500  |
| C | -0.31350800 | -1.25022200 | 0.02422900  |
| N | 0.21355500  | -2.15656000 | -0.87190800 |
| S | 1.90249400  | -2.27097000 | -1.20460700 |
| O | 2.58742400  | -1.63157400 | -0.09507900 |
| O | 2.09267500  | -3.67266900 | -1.53566700 |
| C | 2.21230400  | -1.33297800 | -2.67405500 |
| C | 2.69384500  | -0.03238200 | -2.55941000 |
| C | 2.03648100  | -1.92818200 | -3.92274900 |
| C | 2.97790500  | 0.68681500  | -3.71186200 |
| H | 2.85585000  | 0.39101300  | -1.57015200 |
| C | 2.31124500  | -1.18738700 | -5.06402100 |
| H | 1.72667200  | -2.96795500 | -3.99424600 |
| C | 2.78530600  | 0.12616500  | -4.97851900 |
| H | 3.36394400  | 1.70301600  | -3.63124100 |
| H | 2.17710200  | -1.64144100 | -6.04415500 |
| C | 3.12347200  | 0.89830700  | -6.21527700 |
| H | 4.17445800  | 0.74587800  | -6.49085400 |
| H | 2.51571900  | 0.58018600  | -7.06799300 |
| H | 2.97887000  | 1.97364900  | -6.07113300 |
| C | -0.62796400 | -2.98697500 | -1.73416300 |
| H | -1.65183600 | -2.60647200 | -1.68810800 |
| H | -0.28398800 | -2.88960700 | -2.76977600 |
| H | -0.60440800 | -4.04807900 | -1.46111600 |
| C | -1.96220000 | 3.26921400  | -1.68410100 |
| C | -0.56714900 | 3.23814000  | -1.58494000 |
| C | 0.12436600  | 2.21442900  | -2.23910100 |
| C | -0.55649700 | 1.24181800  | -2.96704400 |
| C | -1.94425800 | 1.28587800  | -3.06003000 |
| C | -2.64486600 | 2.30388600  | -2.41711600 |
| H | -2.51075400 | 4.07063100  | -1.18964300 |
| H | 1.21268100  | 2.20595600  | -2.21218300 |
| H | 0.00857300  | 0.45990400  | -3.47391200 |



|    |             |            |             |
|----|-------------|------------|-------------|
| H  | -2.47823800 | 0.53937900 | -3.64368200 |
| H  | -3.72950000 | 2.35082500 | -2.49325900 |
| C  | 0.15628700  | 4.37077900 | -0.95065500 |
| C  | 1.06320300  | 4.29293800 | 0.13057200  |
| C  | -0.08347600 | 5.62244800 | -1.53794200 |
| C  | 1.70834500  | 5.47250800 | 0.53626100  |
| C  | 0.56127700  | 6.77382100 | -1.11503700 |
| H  | -0.78088800 | 5.67034800 | -2.37207100 |
| C  | 1.47735000  | 6.69626800 | -0.07424500 |
| H  | 2.40506200  | 5.44255700 | 1.36774100  |
| H  | 0.35625100  | 7.72310700 | -1.60321900 |
| H  | 2.00455100  | 7.58191100 | 0.27049200  |
| P  | 1.34253400  | 2.77856800 | 1.15271800  |
| Au | 0.47875900  | 0.66300400 | 0.38674300  |
| C  | 3.22469800  | 2.59765000 | 1.40725800  |
| C  | 3.88986000  | 2.89690700 | 0.06176700  |
| C  | 3.86023400  | 3.46690500 | 2.49384100  |
| C  | 3.50294000  | 1.13431000 | 1.77507200  |
| H  | 3.43432700  | 2.32417100 | -0.75796300 |
| H  | 3.84163000  | 3.95811700 | -0.20439300 |
| H  | 4.94783800  | 2.60796700 | 0.11496300  |
| H  | 3.47628900  | 3.22845500 | 3.49198300  |
| H  | 4.93846100  | 3.25781300 | 2.50935700  |
| H  | 3.75395700  | 4.54309800 | 2.32876200  |
| H  | 4.58390400  | 1.01317200 | 1.92930400  |
| H  | 3.00403500  | 0.83613900 | 2.70473500  |
| H  | 3.19657500  | 0.43072100 | 0.99289300  |
| C  | 0.41477600  | 3.15684800 | 2.76474500  |
| C  | 0.65107400  | 2.00783200 | 3.74640300  |
| C  | 0.75795400  | 4.48510200 | 3.43574200  |
| C  | -1.06582900 | 3.18317400 | 2.37807900  |
| H  | 0.42353200  | 1.03067300 | 3.29829300  |
| H  | 1.67980700  | 1.98582900 | 4.12629500  |
| H  | -0.01299600 | 2.13978900 | 4.61156400  |
| H  | 0.51557700  | 5.34263100 | 2.79916700  |
| H  | 0.14885600  | 4.57581300 | 4.34523100  |
| H  | 1.80609500  | 4.56012200 | 3.74064700  |
| H  | -1.66645800 | 3.37835000 | 3.27738100  |
| H  | -1.28751600 | 3.97681300 | 1.65168900  |
| H  | -1.39841300 | 2.22765500 | 1.95588800  |

**IM5-a:**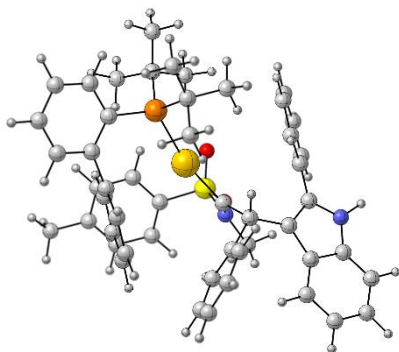

|   |             |             |             |
|---|-------------|-------------|-------------|
| C | -4.12421600 | -5.84323700 | 1.52823900  |
| C | -3.16486900 | -4.83255000 | 1.49986000  |
| C | -3.42571000 | -3.52653900 | 1.01633400  |
| C | -4.71519900 | -3.25854500 | 0.51882400  |
| C | -5.66838900 | -4.26121200 | 0.53735300  |
| C | -5.38176100 | -5.54097400 | 1.03910400  |
| H | -3.88781800 | -6.83054100 | 1.91851600  |
| H | -4.97916600 | -2.27843400 | 0.13411000  |
| H | -6.66593700 | -4.05112600 | 0.15954400  |
| H | -6.15725100 | -6.30252200 | 1.04328300  |
| C | -2.19928500 | -2.77679400 | 1.17019700  |
| C | -1.27543000 | -3.63280900 | 1.73809400  |
| C | 0.14072600  | -3.44017000 | 2.06933400  |
| C | 1.10653100  | -4.31692800 | 1.55919600  |
| C | 0.54697400  | -2.40246300 | 2.91451700  |
| C | 2.45049000  | -4.14559700 | 1.86892800  |
| H | 0.80045900  | -5.12982200 | 0.90091000  |
| C | 1.88971900  | -2.24559500 | 3.23647600  |
| H | -0.20576800 | -1.74775600 | 3.35336800  |
| C | 2.84532000  | -3.10837300 | 2.70753100  |
| H | 3.19051600  | -4.82430800 | 1.45291500  |
| H | 2.18969100  | -1.45624000 | 3.92354900  |
| H | 3.89548000  | -2.97808500 | 2.95795300  |
| N | -1.84944500 | -4.87424200 | 1.90048000  |
| H | -1.57923000 | -0.79825900 | 1.60319600  |
| H | -1.41748900 | -5.62825700 | 2.41450800  |
| C | -5.04072200 | 0.66985400  | 0.50823200  |
| C | -3.87298300 | 0.07923200  | 0.97489700  |
| C | -3.02609600 | -0.61515300 | 0.10685300  |
| C | -3.34873700 | -0.66548200 | -1.24920800 |
| C | -4.52676500 | -0.08875100 | -1.71644800 |
| C | -5.37996500 | 0.57181600  | -0.83962000 |
| H | -5.69681100 | 1.19133300  | 1.20057400  |
| H | -3.63022600 | 0.11830500  | 2.03650600  |
| H | -2.68812000 | -1.16593400 | -1.95678200 |
| H | -4.77856900 | -0.15857600 | -2.77265800 |
| H | -6.30437100 | 1.01282900  | -1.20432800 |
| C | -1.85519300 | -1.37594300 | 0.70688000  |
| C | -0.60053300 | -1.24363200 | -0.16041500 |

|    |             |             |             |
|----|-------------|-------------|-------------|
| N  | -0.28798800 | -2.18694400 | -1.01257000 |
| S  | 1.41508300  | -2.30762800 | -1.65374800 |
| O  | 2.27502200  | -1.82103000 | -0.59531300 |
| O  | 1.46347100  | -3.67814700 | -2.12179000 |
| C  | 1.49709100  | -1.21130300 | -3.03106200 |
| C  | 2.29142400  | -0.07290800 | -2.92994100 |
| C  | 0.86519700  | -1.55926200 | -4.22406400 |
| C  | 2.44265300  | 0.73673700  | -4.04688800 |
| H  | 2.79594000  | 0.15061300  | -1.99273200 |
| C  | 1.01686900  | -0.72719500 | -5.32296500 |
| H  | 0.29244200  | -2.48029500 | -4.30277500 |
| C  | 1.80958400  | 0.42601300  | -5.25483300 |
| H  | 3.06940500  | 1.62576100  | -3.98523400 |
| H  | 0.53100600  | -0.98382600 | -6.26224900 |
| C  | 2.00369700  | 1.28869100  | -6.46146700 |
| H  | 2.88023000  | 0.95853300  | -7.03276800 |
| H  | 1.14207100  | 1.24177000  | -7.13427600 |
| H  | 2.17106700  | 2.33452900  | -6.18607600 |
| C  | -1.11182600 | -3.34478800 | -1.42723100 |
| H  | -2.16027600 | -3.14074600 | -1.22024400 |
| H  | -0.97642700 | -3.49601100 | -2.50044400 |
| H  | -0.80342500 | -4.25342000 | -0.90398800 |
| C  | -1.80325600 | 3.53152300  | -0.97381200 |
| C  | -0.41398800 | 3.47887600  | -1.11904500 |
| C  | 0.13371300  | 2.63184400  | -2.08645100 |
| C  | -0.69258700 | 1.86925200  | -2.90753200 |
| C  | -2.07287700 | 1.93898700  | -2.76084000 |
| C  | -2.62730800 | 2.75896700  | -1.78282300 |
| H  | -2.23520200 | 4.20072600  | -0.23062700 |
| H  | 1.21484900  | 2.60971300  | -2.22576000 |
| H  | -0.25157700 | 1.23639900  | -3.67560700 |
| H  | -2.71984500 | 1.35760500  | -3.41346100 |
| H  | -3.70673600 | 2.80110100  | -1.65585000 |
| C  | 0.44544800  | 4.43688100  | -0.38077900 |
| C  | 1.41800300  | 4.10005300  | 0.58203500  |
| C  | 0.27034500  | 5.78500600  | -0.72413700 |
| C  | 2.19916600  | 5.13377500  | 1.12448900  |
| C  | 1.04907500  | 6.78977100  | -0.17244700 |
| H  | -0.48786300 | 6.02957900  | -1.46562200 |
| C  | 2.03282600  | 6.45900800  | 0.75142400  |
| H  | 2.94855200  | 4.90655900  | 1.87513400  |
| H  | 0.89392700  | 7.82407800  | -0.46839500 |
| H  | 2.66235500  | 7.22778000  | 1.19159600  |
| P  | 1.60121200  | 2.40702000  | 1.28663400  |
| Au | 0.47506700  | 0.52982600  | 0.25127000  |
| C  | 3.46465000  | 2.01362400  | 1.35677500  |
| C  | 4.04927400  | 2.44966900  | 0.01087800  |
| C  | 4.26089300  | 2.65233100  | 2.49624900  |
| C  | 3.62111800  | 0.49497100  | 1.48927500  |
| H  | 3.48109400  | 2.03545100  | -0.83433200 |

|   |             |             |             |
|---|-------------|-------------|-------------|
| H | 4.07497100  | 3.53850100  | -0.10402200 |
| H | 5.07845200  | 2.07551800  | -0.06869200 |
| H | 3.91314000  | 2.32231700  | 3.48157100  |
| H | 5.30606800  | 2.32804000  | 2.40309800  |
| H | 4.27298800  | 3.74559500  | 2.47955800  |
| H | 4.69278600  | 0.25330300  | 1.50123300  |
| H | 3.18860400  | 0.10925000  | 2.41934500  |
| H | 3.16484300  | -0.05755900 | 0.66059500  |
| C | 0.80282800  | 2.56443700  | 3.00286700  |
| C | 1.03273000  | 1.26919800  | 3.77914200  |
| C | 1.28352600  | 3.74993500  | 3.83816100  |
| C | -0.69738100 | 2.73905600  | 2.74545800  |
| H | 0.73304300  | 0.38491100  | 3.20063500  |
| H | 2.08086300  | 1.14610300  | 4.07941600  |
| H | 0.43213300  | 1.29221100  | 4.69859700  |
| H | 1.04888600  | 4.70981900  | 3.36684400  |
| H | 0.75951500  | 3.72490700  | 4.80297400  |
| H | 2.35641000  | 3.71868200  | 4.05296300  |
| H | -1.21408000 | 2.83685900  | 3.70972400  |
| H | -0.90826800 | 3.64533500  | 2.16352000  |
| H | -1.13304100 | 1.88311300  | 2.21147700  |

**TS6:**

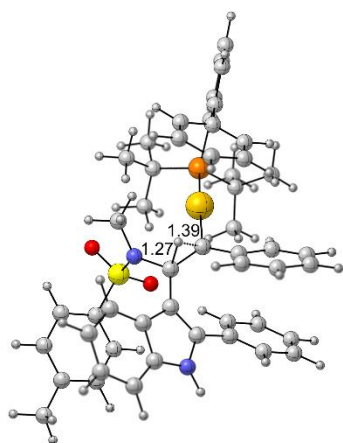

|   |             |             |             |
|---|-------------|-------------|-------------|
| C | -2.11173200 | -4.73911800 | -4.25654000 |
| C | -1.73950500 | -4.04144400 | -3.11107100 |
| C | -1.45801100 | -2.66031400 | -3.11314600 |
| C | -1.57855600 | -1.95050900 | -4.31357200 |
| C | -1.95239900 | -2.63396100 | -5.45918300 |
| C | -2.21368100 | -4.01304100 | -5.43337000 |
| H | -2.32263900 | -5.80554100 | -4.22777800 |
| H | -1.36118000 | -0.88476600 | -4.35482800 |
| H | -2.04365900 | -2.09441600 | -6.39858300 |
| H | -2.50964100 | -4.51846500 | -6.34928000 |
| C | -1.10904600 | -2.30609400 | -1.75800700 |
| C | -1.18084700 | -3.46887200 | -0.99401800 |
| C | -0.90961000 | -3.73922200 | 0.41949100  |
| C | 0.23938100  | -3.24356700 | 1.04691700  |
| C | -1.80536300 | -4.53060800 | 1.14901200  |

|   |             |             |             |
|---|-------------|-------------|-------------|
| C | 0.48154400  | -3.54185100 | 2.38294000  |
| H | 0.94954500  | -2.63861000 | 0.48506800  |
| C | -1.55970600 | -4.81804800 | 2.48576600  |
| H | -2.71740300 | -4.88902700 | 0.67308900  |
| C | -0.41380300 | -4.32660700 | 3.10469500  |
| H | 1.38628400  | -3.16882100 | 2.85824700  |
| H | -2.26568100 | -5.42607700 | 3.04586200  |
| H | -0.21672000 | -4.56017700 | 4.14809200  |
| N | -1.56705800 | -4.49164300 | -1.81423600 |
| H | -1.70978000 | -0.11056600 | -1.23511900 |
| H | -1.59107700 | -5.45786100 | -1.51982500 |
| C | -3.21589100 | -1.48176200 | 2.90661500  |
| C | -2.15781400 | -1.00804400 | 2.14071500  |
| C | -2.25539500 | -0.94509100 | 0.74507700  |
| C | -3.46677100 | -1.31748000 | 0.14122800  |
| C | -4.53714500 | -1.74789000 | 0.91135900  |
| C | -4.41250000 | -1.84321700 | 2.29635900  |
| H | -3.11054100 | -1.54721900 | 3.98663600  |
| H | -1.23179800 | -0.69486300 | 2.62245900  |
| H | -3.58260700 | -1.25016500 | -0.94101700 |
| H | -5.47582700 | -2.00837900 | 0.42873900  |
| H | -5.25156800 | -2.18489500 | 2.89698300  |
| C | -1.10775500 | -0.41531900 | -0.01835400 |
| C | -0.76924500 | -0.96954600 | -1.28792300 |
| N | 0.14536400  | -0.25018800 | -2.14395300 |
| S | 1.77541900  | -0.72902300 | -2.12230800 |
| O | 2.51087100  | 0.42714200  | -2.61095800 |
| O | 2.05001600  | -1.29224100 | -0.80488600 |
| C | 1.85959200  | -2.03041300 | -3.31216100 |
| C | 1.81785900  | -1.69870000 | -4.66396800 |
| C | 1.86861800  | -3.35447800 | -2.88685300 |
| C | 1.76001300  | -2.71886800 | -5.60035700 |
| H | 1.83655900  | -0.65554000 | -4.97327300 |
| C | 1.80665000  | -4.36039700 | -3.84091300 |
| H | 1.92164400  | -3.58557300 | -1.82557100 |
| C | 1.73187100  | -4.06007700 | -5.20387700 |
| H | 1.72551800  | -2.47625500 | -6.66096200 |
| H | 1.81151900  | -5.40252800 | -3.52510200 |
| C | 1.58548000  | -5.14989900 | -6.21848100 |
| H | 2.03926500  | -4.87689000 | -7.17636700 |
| H | 2.03822200  | -6.08629500 | -5.87761200 |
| H | 0.52132200  | -5.34810700 | -6.40569100 |
| C | -0.18649000 | 1.08369600  | -2.64305400 |
| H | 0.49424700  | 1.33918100  | -3.45766900 |
| H | -1.21045300 | 1.06178500  | -3.03967600 |
| H | -0.12390200 | 1.86665100  | -1.87360000 |
| C | -1.56081400 | 4.07466000  | -0.10380300 |
| C | -1.36485500 | 3.81238800  | 1.25508800  |
| C | -2.22827400 | 2.91980900  | 1.90221500  |
| C | -3.25663900 | 2.29495300  | 1.20273000  |

|    |             |             |             |
|----|-------------|-------------|-------------|
| C  | -3.43653800 | 2.55538600  | -0.15340700 |
| C  | -2.58623700 | 3.44481700  | -0.80509000 |
| H  | -0.91323100 | 4.79295200  | -0.60565500 |
| H  | -2.09671700 | 2.73046700  | 2.96761600  |
| H  | -3.92057400 | 1.60469000  | 1.71981000  |
| H  | -4.25120500 | 2.07832400  | -0.69482200 |
| H  | -2.73452200 | 3.66983800  | -1.85943700 |
| C  | -0.36480000 | 4.59863300  | 2.03306800  |
| C  | 0.92469400  | 4.16880700  | 2.41360000  |
| C  | -0.79065100 | 5.87804800  | 2.41316700  |
| C  | 1.71651600  | 5.03999400  | 3.18007600  |
| C  | 0.00838400  | 6.72276400  | 3.16860000  |
| H  | -1.78457200 | 6.19973800  | 2.10748700  |
| C  | 1.27103100  | 6.29696800  | 3.56150900  |
| H  | 2.71478300  | 4.73702900  | 3.48043000  |
| H  | -0.35536500 | 7.70728100  | 3.45121400  |
| H  | 1.91279100  | 6.94062000  | 4.15731300  |
| P  | 1.62782300  | 2.54060000  | 1.91805300  |
| Au | 0.08390500  | 1.09749600  | 0.81753000  |
| C  | 3.07218200  | 2.92455300  | 0.75716900  |
| C  | 2.43020300  | 3.43104100  | -0.53794000 |
| C  | 4.04463100  | 3.99041400  | 1.25958100  |
| C  | 3.83432700  | 1.63117700  | 0.46588400  |
| H  | 1.84266100  | 2.64892500  | -1.03380600 |
| H  | 1.79208500  | 4.30825300  | -0.36557700 |
| H  | 3.22553900  | 3.72868100  | -1.23402900 |
| H  | 4.51171900  | 3.73319100  | 2.21640900  |
| H  | 4.85256200  | 4.08810300  | 0.52238700  |
| H  | 3.57005800  | 4.97300000  | 1.35239700  |
| H  | 4.52400400  | 1.81257600  | -0.36915800 |
| H  | 4.43820400  | 1.30706000  | 1.32219200  |
| H  | 3.17630200  | 0.80720900  | 0.16269400  |
| C  | 2.14616700  | 1.63834000  | 3.50799200  |
| C  | 2.32094700  | 0.14853800  | 3.18429000  |
| C  | 3.43118400  | 2.13819300  | 4.16625600  |
| C  | 0.97704100  | 1.78579900  | 4.48499300  |
| H  | 1.39654900  | -0.29960200 | 2.79662000  |
| H  | 3.11273100  | -0.04086300 | 2.45196700  |
| H  | 2.58923900  | -0.37939200 | 4.10989400  |
| H  | 3.37292600  | 3.18271700  | 4.48766000  |
| H  | 3.61355100  | 1.54109300  | 5.06989500  |
| H  | 4.30689300  | 2.01548400  | 3.51914600  |
| H  | 1.17439800  | 1.16865700  | 5.37167000  |
| H  | 0.83929000  | 2.82017600  | 4.81926400  |
| H  | 0.03187300  | 1.43906700  | 4.04369800  |

PD:

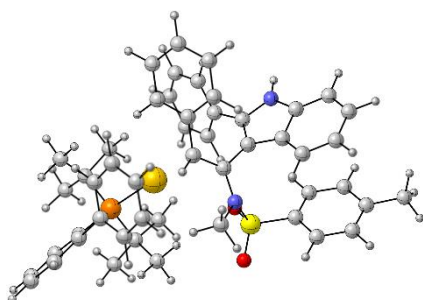

|   |             |             |             |
|---|-------------|-------------|-------------|
| C | -1.70618900 | -5.21125700 | -3.18907900 |
| C | -1.25773800 | -4.24915600 | -2.28612100 |
| C | -1.18633400 | -2.87801300 | -2.60756900 |
| C | -1.64032600 | -2.45301300 | -3.86324000 |
| C | -2.08745600 | -3.40249900 | -4.76603900 |
| C | -2.11373000 | -4.76858900 | -4.43656700 |
| H | -1.74537700 | -6.26419600 | -2.92018500 |
| H | -1.61748300 | -1.39846700 | -4.13478500 |
| H | -2.42605000 | -3.08682700 | -5.75020400 |
| H | -2.47441100 | -5.48801200 | -5.16752700 |
| C | -0.67293100 | -2.20002800 | -1.43576500 |
| C | -0.47045800 | -3.16209000 | -0.46496000 |
| C | 0.07442600  | -3.13384300 | 0.89931300  |
| C | 1.41565400  | -2.80399100 | 1.11851500  |
| C | -0.71104800 | -3.59471800 | 1.96154000  |
| C | 1.96830400  | -2.96745800 | 2.38407300  |
| H | 2.02039500  | -2.45486400 | 0.28327500  |
| C | -0.15732800 | -3.73216900 | 3.22950300  |
| H | -1.75880400 | -3.83676100 | 1.78312900  |
| C | 1.18691500  | -3.43439100 | 3.43756200  |
| H | 3.02114900  | -2.74163000 | 2.54410400  |
| H | -0.77147900 | -4.09076800 | 4.05191600  |
| H | 1.62666300  | -3.56650200 | 4.42373200  |
| N | -0.81901000 | -4.38305100 | -0.98631600 |
| H | -1.98668200 | 0.88269200  | -0.69561400 |
| H | -0.66943400 | -5.25410500 | -0.49730200 |
| C | -3.81864400 | -1.58860200 | 2.34813400  |
| C | -2.82326900 | -0.86891200 | 1.69293700  |
| C | -2.68558200 | -0.92751100 | 0.30304000  |
| C | -3.58591200 | -1.72350700 | -0.41653400 |
| C | -4.57264700 | -2.45300400 | 0.23520200  |
| C | -4.69312200 | -2.38844800 | 1.62139500  |
| H | -3.90328400 | -1.52838500 | 3.43077800  |
| H | -2.13011100 | -0.25792000 | 2.27493100  |
| H | -3.50601500 | -1.77670000 | -1.50181200 |
| H | -5.25737600 | -3.06756500 | -0.34431200 |
| H | -5.46968000 | -2.95416700 | 2.13024200  |
| C | -1.65005500 | -0.12837000 | -0.42626900 |
| C | -0.76954100 | -0.74624400 | -1.33359300 |
| N | -0.13664500 | -0.03065300 | -2.32793800 |

|    |             |             |             |
|----|-------------|-------------|-------------|
| S  | 1.55303200  | -0.37783600 | -2.68548700 |
| O  | 2.04342500  | 0.87934200  | -3.22302200 |
| O  | 2.12653500  | -0.94500700 | -1.47589900 |
| C  | 1.53467200  | -1.58268800 | -3.96739700 |
| C  | 1.27850800  | -1.15652600 | -5.26820000 |
| C  | 1.74166300  | -2.92496600 | -3.66167700 |
| C  | 1.20837000  | -2.10565200 | -6.27700800 |
| H  | 1.15346900  | -0.09803500 | -5.48549400 |
| C  | 1.67018700  | -3.85498200 | -4.68625700 |
| H  | 1.94781500  | -3.22624900 | -2.63694500 |
| C  | 1.38577500  | -3.46447700 | -5.99921500 |
| H  | 1.01205200  | -1.79091700 | -7.30004500 |
| H  | 1.82349300  | -4.91020600 | -4.46676700 |
| C  | 1.24509200  | -4.49340800 | -7.07578000 |
| H  | 1.33371600  | -4.05489000 | -8.07405400 |
| H  | 1.99685200  | -5.28361100 | -6.97851500 |
| H  | 0.26069900  | -4.97541600 | -7.01070000 |
| C  | -0.58154800 | 1.31733500  | -2.67262600 |
| H  | -0.10553200 | 1.62496700  | -3.60408100 |
| H  | -1.66700400 | 1.29266800  | -2.81362200 |
| H  | -0.33264500 | 2.05448900  | -1.89461600 |
| C  | -1.39920200 | 4.13655100  | -0.30946600 |
| C  | -1.17910500 | 3.87426600  | 1.04612200  |
| C  | -2.13919300 | 3.13960900  | 1.75384900  |
| C  | -3.28740500 | 2.67476100  | 1.12032600  |
| C  | -3.49168400 | 2.93349900  | -0.23308800 |
| C  | -2.54493200 | 3.66597600  | -0.94538900 |
| H  | -0.66889200 | 4.72957100  | -0.85969700 |
| H  | -1.99946600 | 2.97096500  | 2.82072800  |
| H  | -4.02790100 | 2.11417600  | 1.68618300  |
| H  | -4.39570400 | 2.58084600  | -0.72425700 |
| H  | -2.70732000 | 3.88999800  | -1.99792300 |
| C  | -0.04720400 | 4.53353100  | 1.75038100  |
| C  | 1.04756500  | 3.89211600  | 2.36971800  |
| C  | -0.13778100 | 5.93078700  | 1.82215700  |
| C  | 1.96683100  | 4.68515500  | 3.07741000  |
| C  | 0.79028800  | 6.69503800  | 2.51211900  |
| H  | -0.98414800 | 6.41442800  | 1.33822000  |
| C  | 1.84477600  | 6.06445200  | 3.15921100  |
| H  | 2.81434000  | 4.21945400  | 3.56889400  |
| H  | 0.68198800  | 7.77569600  | 2.55371600  |
| H  | 2.57680900  | 6.63975400  | 3.71968500  |
| P  | 1.40455900  | 2.08794700  | 2.24890600  |
| Au | -0.11315100 | 0.83617000  | 0.90913600  |
| C  | 3.07648200  | 1.94774700  | 1.36114200  |
| C  | 2.79920300  | 2.39934300  | -0.07725900 |
| C  | 4.21983500  | 2.79713000  | 1.91536400  |
| C  | 3.49993600  | 0.47778600  | 1.35728900  |
| H  | 2.10433000  | 1.72676300  | -0.59293800 |
| H  | 2.39872200  | 3.42141400  | -0.12091700 |



|   |             |             |             |
|---|-------------|-------------|-------------|
| H | 3.73895000  | 2.38414200  | -0.64499300 |
| H | 4.43525300  | 2.60305100  | 2.97169700  |
| H | 5.12757700  | 2.54739800  | 1.35038300  |
| H | 4.04361600  | 3.86877800  | 1.78047200  |
| H | 4.32872400  | 0.35487400  | 0.64741000  |
| H | 3.85904200  | 0.15254700  | 2.34192100  |
| H | 2.69424500  | -0.19120300 | 1.02844200  |
| C | 1.37425900  | 1.41731100  | 4.02461300  |
| C | 1.30787700  | -0.10792700 | 3.96495300  |
| C | 2.56624600  | 1.81781300  | 4.89238700  |
| C | 0.08178500  | 1.93061900  | 4.66248900  |
| H | 0.45067900  | -0.46988800 | 3.38042600  |
| H | 2.21101300  | -0.55140000 | 3.53467000  |
| H | 1.20295600  | -0.49894200 | 4.98658100  |
| H | 2.63603600  | 2.89813800  | 5.05253600  |
| H | 2.44159100  | 1.35944000  | 5.88254400  |
| H | 3.51794800  | 1.45389300  | 4.48895200  |
| H | -0.00099300 | 1.51273800  | 5.67441900  |
| H | 0.05685200  | 3.02322300  | 4.74805900  |
| H | -0.80274000 | 1.60108600  | 4.10081800  |

**TS6-a:**

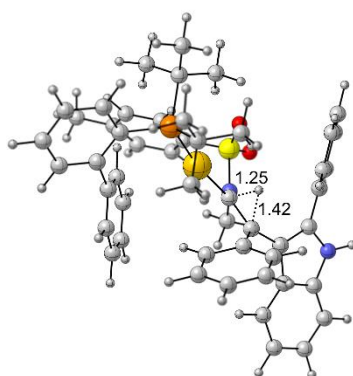

|   |             |             |             |
|---|-------------|-------------|-------------|
| C | -4.60403600 | -5.73083900 | 0.32215000  |
| C | -3.50133800 | -4.91796100 | 0.57300400  |
| C | -3.54845400 | -3.51429100 | 0.43260100  |
| C | -4.73528700 | -2.90895600 | 0.00051500  |
| C | -5.83458100 | -3.71255900 | -0.24957900 |
| C | -5.77085800 | -5.10652400 | -0.08780400 |
| H | -4.55057900 | -6.81050500 | 0.43891800  |
| H | -4.79595300 | -1.82803500 | -0.11960300 |
| H | -6.76766400 | -3.25919900 | -0.57415000 |
| H | -6.65324500 | -5.70744400 | -0.29122300 |
| C | -2.23154600 | -3.02506900 | 0.75149700  |
| C | -1.45585800 | -4.12059800 | 1.09916700  |
| C | -0.07323600 | -4.17376300 | 1.57706700  |
| C | 0.83977700  | -5.06176100 | 1.00224100  |
| C | 0.35413500  | -3.32137300 | 2.60590200  |
| C | 2.15973800  | -5.08702000 | 1.43774400  |
| H | 0.52402400  | -5.69926200 | 0.17800400  |
| C | 1.67534100  | -3.34513100 | 3.03198300  |

|   |             |             |             |
|---|-------------|-------------|-------------|
| H | -0.36481500 | -2.66450000 | 3.09778800  |
| C | 2.58005000  | -4.22808700 | 2.44684700  |
| H | 2.86566600  | -5.76834600 | 0.97061200  |
| H | 1.99528700  | -2.68703100 | 3.83624500  |
| H | 3.61420300  | -4.24677700 | 2.78043800  |
| N | -2.21877900 | -5.25131600 | 0.97031000  |
| H | -0.42470000 | -1.57794300 | 1.10481600  |
| H | -1.92358200 | -6.16125800 | 1.29518000  |
| C | -3.91372200 | 0.07703900  | 3.23247500  |
| C | -3.08781000 | -0.85725000 | 2.62548000  |
| C | -2.59198900 | -0.62543300 | 1.33487400  |
| C | -2.97085000 | 0.53542500  | 0.64937700  |
| C | -3.83073900 | 1.45066500  | 1.24780100  |
| C | -4.29260800 | 1.22828700  | 2.54047200  |
| H | -4.28342300 | -0.09949600 | 4.23904900  |
| H | -2.82649100 | -1.78030200 | 3.14046700  |
| H | -2.62152900 | 0.69649000  | -0.36889300 |
| H | -4.13391100 | 2.34100600  | 0.70083200  |
| H | -4.96153500 | 1.94543700  | 3.01002700  |
| C | -1.77038800 | -1.64217800 | 0.65601300  |
| C | -0.60435400 | -1.22934000 | -0.08113500 |
| N | -0.13972500 | -2.13892900 | -1.03764600 |
| S | 1.51763800  | -2.37828700 | -1.34276700 |
| O | 2.22177600  | -1.81025100 | -0.20517800 |
| O | 1.62643700  | -3.77841900 | -1.71498000 |
| C | 1.90516200  | -1.42557500 | -2.78652000 |
| C | 2.42999200  | -0.14519600 | -2.63940400 |
| C | 1.71515300  | -1.98295400 | -4.05028000 |
| C | 2.74669200  | 0.59084200  | -3.77309600 |
| H | 2.60280400  | 0.25040300  | -1.64030100 |
| C | 2.02317900  | -1.22586500 | -5.17247500 |
| H | 1.36464000  | -3.00760900 | -4.14729900 |
| C | 2.54295400  | 0.06740000  | -5.05391100 |
| H | 3.17162700  | 1.58920600  | -3.66795200 |
| H | 1.87811200  | -1.65177400 | -6.16367700 |
| C | 2.91652700  | 0.85398900  | -6.27136200 |
| H | 3.94739200  | 0.63167800  | -6.57400500 |
| H | 2.27129400  | 0.61083400  | -7.12138800 |
| H | 2.85623500  | 1.93172300  | -6.09041700 |
| C | -1.05821600 | -2.85665100 | -1.92268200 |
| H | -2.03565000 | -2.36568000 | -1.88434900 |
| H | -0.69301200 | -2.79121000 | -2.95343700 |
| H | -1.17242900 | -3.91176500 | -1.64885100 |
| C | -2.09281800 | 3.33028100  | -1.56822400 |
| C | -0.69494800 | 3.28920000  | -1.53688400 |
| C | -0.04132600 | 2.28333900  | -2.25734000 |
| C | -0.76351200 | 1.33411800  | -2.97746400 |
| C | -2.15458500 | 1.38447400  | -2.99666500 |
| C | -2.81666300 | 2.38793500  | -2.29289700 |
| H | -2.61085600 | 4.12144800  | -1.02652900 |

|    |             |            |             |
|----|-------------|------------|-------------|
| H  | 1.04740100  | 2.26814300 | -2.28689300 |
| H  | -0.22814100 | 0.56528100 | -3.53427300 |
| H  | -2.72082300 | 0.65629800 | -3.57279000 |
| H  | -3.90337600 | 2.44154000 | -2.31332000 |
| C  | 0.06169200  | 4.39055600 | -0.88551700 |
| C  | 0.99193800  | 4.26208000 | 0.17111200  |
| C  | -0.17570800 | 5.66536000 | -1.42059000 |
| C  | 1.66285500  | 5.41696800 | 0.60548500  |
| C  | 0.49387900  | 6.79193900 | -0.96979900 |
| H  | -0.89219600 | 5.75324500 | -2.23508200 |
| C  | 1.43239500  | 6.66497900 | 0.04605300  |
| H  | 2.38041300  | 5.34695800 | 1.41680000  |
| H  | 0.29035800  | 7.76125400 | -1.41746800 |
| H  | 1.97871800  | 7.53110100 | 0.40992000  |
| P  | 1.29664800  | 2.69730300 | 1.10113200  |
| Au | 0.27390900  | 0.69312400 | 0.27630300  |
| C  | 3.18210700  | 2.43346300 | 1.18028600  |
| C  | 3.73416400  | 2.75958500 | -0.20932900 |
| C  | 3.93879700  | 3.25195900 | 2.22746100  |
| C  | 3.43739500  | 0.95051800 | 1.47775800  |
| H  | 3.19401100  | 2.22495900 | -1.00232800 |
| H  | 3.69085700  | 3.83030800 | -0.43626700 |
| H  | 4.78473800  | 2.44436100 | -0.25816700 |
| H  | 3.63053000  | 3.00816900 | 3.25014000  |
| H  | 5.00545400  | 3.00236100 | 2.14871200  |
| H  | 3.86085400  | 4.33421200 | 2.08638800  |
| H  | 4.52247900  | 0.78290700 | 1.50852300  |
| H  | 3.03185800  | 0.64213600 | 2.44817000  |
| H  | 3.01850900  | 0.27949500 | 0.71953700  |
| C  | 0.52547500  | 2.99926100 | 2.80948000  |
| C  | 0.84250000  | 1.80520200 | 3.71237000  |
| C  | 0.94294800  | 4.29352800 | 3.50557300  |
| C  | -0.98557100 | 3.04780900 | 2.57161600  |
| H  | 0.57121800  | 0.84777400 | 3.24397900  |
| H  | 1.89994300  | 1.76410100 | 3.99938600  |
| H  | 0.25826600  | 1.89961900 | 4.63768500  |
| H  | 0.62430900  | 5.18048500 | 2.94807500  |
| H  | 0.44546800  | 4.33124800 | 4.48392800  |
| H  | 2.01962800  | 4.36215500 | 3.68872800  |
| H  | -1.49170100 | 3.26316800 | 3.52291900  |
| H  | -1.26968100 | 3.83437400 | 1.85862000  |
| H  | -1.36856800 | 2.09128700 | 2.19827100  |

PD-a:

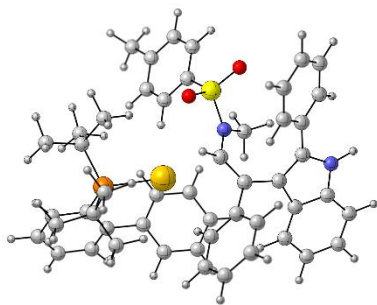

|   |             |             |             |
|---|-------------|-------------|-------------|
| C | -5.12073300 | -4.49132200 | -0.98324200 |
| C | -3.87875400 | -4.18956000 | -0.43016500 |
| C | -3.53940200 | -2.89675900 | 0.01739900  |
| C | -4.48119600 | -1.86730500 | -0.10801900 |
| C | -5.71858600 | -2.15832400 | -0.65853900 |
| C | -6.03611900 | -3.45650700 | -1.09029100 |
| H | -5.36158500 | -5.49687300 | -1.31982300 |
| H | -4.24889500 | -0.86204900 | 0.24002200  |
| H | -6.46406000 | -1.37176400 | -0.75020700 |
| H | -7.01699900 | -3.65351800 | -1.51489300 |
| C | -2.17589200 | -2.95843300 | 0.49025000  |
| C | -1.75746400 | -4.27971500 | 0.35293700  |
| C | -0.52407300 | -4.95480900 | 0.74974600  |
| C | -0.05288800 | -6.04333600 | 0.00405200  |
| C | 0.18341500  | -4.56164400 | 1.89268900  |
| C | 1.09375600  | -6.72141400 | 0.39275500  |
| H | -0.57166000 | -6.33958200 | -0.90740700 |
| C | 1.33352000  | -5.23822900 | 2.27413700  |
| H | -0.18533800 | -3.73541800 | 2.49787400  |
| C | 1.78912400  | -6.32128200 | 1.52871000  |
| H | 1.45174500  | -7.55947600 | -0.19964600 |
| H | 1.87179300  | -4.92399400 | 3.16459900  |
| H | 2.68851700  | -6.85082300 | 1.83168800  |
| N | -2.77973200 | -4.99905900 | -0.21700700 |
| H | 0.55913200  | -1.11187900 | 1.37250900  |
| H | -2.78816700 | -6.00805200 | -0.26067400 |
| C | -3.22215300 | -1.11353300 | 4.23466300  |
| C | -2.54596100 | -1.77436000 | 3.22099300  |
| C | -2.10465000 | -1.07956100 | 2.08374700  |
| C | -2.42519600 | 0.27686700  | 1.96654900  |
| C | -3.13370200 | 0.93351300  | 2.97216900  |
| C | -3.52073600 | 0.24420900  | 4.11284100  |
| H | -3.53511300 | -1.66158500 | 5.11963700  |
| H | -2.34679200 | -2.84165300 | 3.30156000  |
| H | -2.21170100 | 0.79643400  | 1.03198300  |
| H | -3.40165400 | 1.98114200  | 2.84335400  |
| H | -4.07731000 | 0.75163300  | 4.89665600  |
| C | -1.41722200 | -1.83491400 | 1.01381500  |
| C | -0.14654000 | -1.47761300 | 0.60235900  |
| N | 0.50629100  | -2.00153400 | -0.53726500 |
| S | 2.15287900  | -2.38143200 | -0.44270200 |

|    |             |             |             |
|----|-------------|-------------|-------------|
| O  | 2.62817500  | -1.68947100 | 0.75128600  |
| O  | 2.35531600  | -3.81008900 | -0.60670300 |
| C  | 2.79206200  | -1.60424400 | -1.90949200 |
| C  | 2.44724100  | -0.29587700 | -2.23877300 |
| C  | 3.67046500  | -2.33355600 | -2.70464300 |
| C  | 2.98644900  | 0.27935400  | -3.38032500 |
| H  | 1.73807000  | 0.25604100  | -1.61749200 |
| C  | 4.21160800  | -1.73689300 | -3.83620000 |
| H  | 3.91011600  | -3.35944800 | -2.43824400 |
| C  | 3.88156300  | -0.42727900 | -4.19162200 |
| H  | 2.71072100  | 1.29683600  | -3.65804500 |
| H  | 4.89767900  | -2.30237200 | -4.46419400 |
| C  | 4.48467400  | 0.20986400  | -5.40460100 |
| H  | 5.46570900  | 0.64124000  | -5.16942200 |
| H  | 4.63887100  | -0.51941100 | -6.20622800 |
| H  | 3.85705700  | 1.01825100  | -5.79254000 |
| C  | -0.20808600 | -2.48292100 | -1.71055900 |
| H  | -1.14358600 | -1.92137400 | -1.80061400 |
| H  | 0.39894100  | -2.29669200 | -2.60424400 |
| H  | -0.43891900 | -3.55363300 | -1.65613900 |
| C  | -2.70191300 | 2.75063500  | -0.83104400 |
| C  | -1.37447000 | 2.95711100  | -1.21730800 |
| C  | -0.74921700 | 1.98970400  | -2.01599900 |
| C  | -1.43142800 | 0.84013200  | -2.40636500 |
| C  | -2.74912700 | 0.63718600  | -2.00119800 |
| C  | -3.38138900 | 1.59707700  | -1.21599600 |
| H  | -3.20296200 | 3.50762500  | -0.22802400 |
| H  | 0.26514900  | 2.17090400  | -2.37216700 |
| H  | -0.93257400 | 0.11388800  | -3.04607200 |
| H  | -3.28719300 | -0.26117100 | -2.29938700 |
| H  | -4.41469600 | 1.45042600  | -0.90651900 |
| C  | -0.69761100 | 4.24755800  | -0.92443900 |
| C  | 0.46690000  | 4.41780000  | -0.14311500 |
| C  | -1.26718900 | 5.37178700  | -1.53768100 |
| C  | 1.03268400  | 5.70079800  | -0.06363800 |
| C  | -0.70035600 | 6.63265900  | -1.43244000 |
| H  | -2.16590800 | 5.22989000  | -2.13492200 |
| C  | 0.47033400  | 6.79603900  | -0.70269400 |
| H  | 1.93279200  | 5.85730900  | 0.52314600  |
| H  | -1.16411800 | 7.48039800  | -1.92993400 |
| H  | 0.94214900  | 7.77153400  | -0.62097300 |
| P  | 1.21602300  | 3.09358100  | 0.89377200  |
| Au | 0.26183600  | 0.92695300  | 0.60442000  |
| C  | 3.07245800  | 3.00543000  | 0.49020400  |
| C  | 3.19968800  | 3.15230300  | -1.02699300 |
| C  | 3.94848700  | 4.05463900  | 1.17617000  |
| C  | 3.58250200  | 1.62058600  | 0.90251400  |
| H  | 2.52875100  | 2.46753300  | -1.56077800 |
| H  | 2.98886600  | 4.17176500  | -1.36760900 |
| H  | 4.22553600  | 2.89649900  | -1.32442700 |

|   |             |            |            |
|---|-------------|------------|------------|
| H | 3.95945500  | 3.94286900 | 2.26581400 |
| H | 4.98083600  | 3.90989600 | 0.83103800 |
| H | 3.67781900  | 5.08615300 | 0.93005500 |
| H | 4.65703000  | 1.56396900 | 0.68363100 |
| H | 3.45590300  | 1.42135900 | 1.97254400 |
| H | 3.09280500  | 0.80667800 | 0.35740200 |
| C | 0.86003200  | 3.61038800 | 2.68225800 |
| C | 1.54071600  | 2.61527300 | 3.62300000 |
| C | 1.27860800  | 5.03426200 | 3.04811100 |
| C | -0.65675400 | 3.50092300 | 2.84828400 |
| H | 1.28621200  | 1.57444300 | 3.38243800 |
| H | 2.63239500  | 2.71551000 | 3.62144100 |
| H | 1.19893500  | 2.80986900 | 4.64803900 |
| H | 0.71721800  | 5.78621400 | 2.48412600 |
| H | 1.04883300  | 5.19020400 | 4.11038100 |
| H | 2.34863600  | 5.22202300 | 2.91975400 |
| H | -0.92880200 | 3.83589400 | 3.85825700 |
| H | -1.19926800 | 4.13286600 | 2.13179300 |
| H | -1.00138700 | 2.46682400 | 2.73859800 |

### 7.3 Coordinates of Optimized Structures in Figure 3

**IM3:**

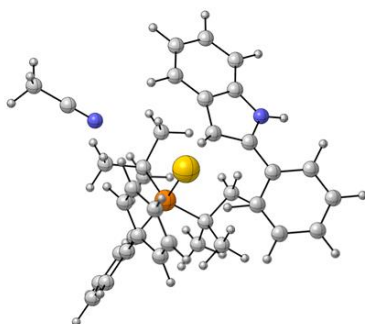

|   |             |             |             |
|---|-------------|-------------|-------------|
| C | -1.22478300 | 1.07280500  | -4.50328400 |
| C | -0.14479000 | 0.88819400  | -3.64604000 |
| C | 0.17261500  | 1.79274700  | -2.61484800 |
| C | -0.59732900 | 2.94743200  | -2.45483100 |
| C | -1.66481700 | 3.15013400  | -3.31505400 |
| C | -1.97966000 | 2.22242200  | -4.32080200 |
| H | -1.45968500 | 0.35899800  | -5.28900700 |
| H | -0.37339200 | 3.64862800  | -1.65413600 |
| H | -2.27543300 | 4.04334100  | -3.21069900 |
| H | -2.82607100 | 2.41203000  | -4.97550300 |
| C | 1.29700200  | 1.22559400  | -1.87616700 |
| C | 1.66056900  | 0.04092700  | -2.57065100 |
| C | 2.79379500  | -0.84992500 | -2.34698800 |
| C | 3.39349400  | -0.92192600 | -1.08206600 |
| C | 3.31536500  | -1.62297300 | -3.39157600 |
| C | 4.47944000  | -1.75637200 | -0.86748300 |
| H | 2.98736200  | -0.33602700 | -0.25710600 |
| C | 4.40070000  | -2.46127300 | -3.17042400 |
| H | 2.90309000  | -1.53989400 | -4.39587800 |

|   |             |             |             |
|---|-------------|-------------|-------------|
| C | 4.98333100  | -2.53277000 | -1.90902400 |
| H | 4.92924500  | -1.80784100 | 0.12147500  |
| H | 4.80073400  | -3.05143700 | -3.99055800 |
| H | 5.83187900  | -3.19009600 | -1.73846500 |
| N | 0.78997700  | -0.14128300 | -3.59648300 |
| H | 2.02197900  | 1.80887000  | -1.31128100 |
| H | 0.74561200  | -0.98344000 | -4.15398300 |
| C | 2.53405900  | 0.01398300  | 2.72702600  |
| C | 1.19534900  | 0.41713800  | 2.76282300  |
| C | 0.84934300  | 1.65673800  | 2.20926400  |
| C | 1.82149200  | 2.46960900  | 1.63038400  |
| C | 3.15136900  | 2.05770300  | 1.59779700  |
| C | 3.50426500  | 0.82701900  | 2.14664700  |
| H | 2.81275600  | -0.94217000 | 3.16904300  |
| H | -0.18156000 | 2.00669700  | 2.25049200  |
| H | 1.52455500  | 3.42891400  | 1.20975700  |
| H | 3.91312200  | 2.69800300  | 1.15896400  |
| H | 4.54323600  | 0.50403100  | 2.13536200  |
| C | 0.19075100  | -0.39605300 | 3.49724600  |
| C | -0.95900300 | -0.99639700 | 2.93739600  |
| C | 0.41467500  | -0.53181400 | 4.87414200  |
| C | -1.85118400 | -1.66096100 | 3.79386100  |
| C | -0.47402000 | -1.20206600 | 5.70089300  |
| H | 1.30402000  | -0.06831900 | 5.29696900  |
| C | -1.62554200 | -1.75951100 | 5.15898000  |
| H | -2.74431600 | -2.12575500 | 3.38573700  |
| H | -0.27280900 | -1.27838200 | 6.76630500  |
| H | -2.34237700 | -2.27688000 | 5.79098400  |
| P | -1.28051300 | -1.07796000 | 1.12937000  |
| C | -0.95882700 | -2.88653000 | 0.66149400  |
| C | 0.54160000  | -3.11078300 | 0.87714600  |
| C | -1.71960700 | -3.91849000 | 1.49340800  |
| C | -1.28685000 | -3.07814800 | -0.81985600 |
| H | 1.15558400  | -2.46905800 | 0.23121800  |
| H | 0.83599500  | -2.93522100 | 1.91995500  |
| H | 0.78113600  | -4.15530300 | 0.63714200  |
| H | -2.80669000 | -3.81929800 | 1.41635600  |
| H | -1.45829900 | -4.91894900 | 1.12395900  |
| H | -1.43739900 | -3.88149100 | 2.55076000  |
| H | -0.96389000 | -4.08188900 | -1.12670000 |
| H | -2.36187600 | -3.00616500 | -1.02435200 |
| H | -0.76258800 | -2.34895500 | -1.45461800 |
| C | -3.06199100 | -0.49986800 | 0.80392200  |
| C | -3.15066500 | -0.03591600 | -0.65660300 |
| C | -4.14821200 | -1.54957300 | 1.03854400  |
| C | -3.30547500 | 0.71176400  | 1.70611000  |
| H | -2.50265100 | 0.82861400  | -0.85408600 |
| H | -2.89443400 | -0.82622400 | -1.37229700 |
| H | -4.18484100 | 0.27193000  | -0.86216800 |
| H | -4.17992600 | -1.92564100 | 2.06610600  |

|    |             |             |             |
|----|-------------|-------------|-------------|
| H  | -5.12345300 | -1.08364700 | 0.84425400  |
| H  | -4.06063400 | -2.40299000 | 0.35657100  |
| H  | -4.27509600 | 1.15384800  | 1.44022600  |
| H  | -3.33855500 | 0.44432400  | 2.76777600  |
| H  | -2.54253500 | 1.48845800  | 1.56116800  |
| N  | -1.36397100 | 3.63625300  | 0.78376600  |
| C  | -1.84591200 | 4.65555600  | 1.06169200  |
| C  | -2.44866200 | 5.92837900  | 1.40976400  |
| H  | -2.75395800 | 5.92763300  | 2.45992000  |
| H  | -1.73405200 | 6.74158400  | 1.25467600  |
| H  | -3.32994000 | 6.11338900  | 0.78923900  |
| Au | 0.13923600  | 0.20679600  | -0.24998300 |

**TS4:**

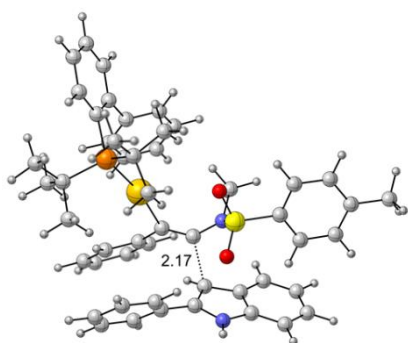

|   |            |             |             |
|---|------------|-------------|-------------|
| C | 6.08002200 | -7.63017700 | -6.99144100 |
| C | 5.80044800 | -6.85413800 | -5.87254900 |
| C | 4.77441100 | -5.88855500 | -5.84830600 |
| C | 4.02946300 | -5.66265800 | -7.00667000 |
| C | 4.30077000 | -6.42600400 | -8.13473900 |
| C | 5.30640800 | -7.40364500 | -8.12425400 |
| H | 6.86523600 | -8.38202600 | -6.98270900 |
| H | 3.24110200 | -4.91174100 | -7.01825000 |
| H | 3.71828200 | -6.27349500 | -9.03973500 |
| H | 5.48432000 | -7.99743700 | -9.01750800 |
| C | 4.77123100 | -5.29974800 | -4.52799500 |
| C | 5.75964300 | -5.98579500 | -3.79418300 |
| C | 6.16474500 | -5.81540900 | -2.39858100 |
| C | 7.50405200 | -5.55312300 | -2.08283600 |
| C | 5.21360500 | -5.90205500 | -1.37875400 |
| C | 7.87880500 | -5.37603400 | -0.75658200 |
| H | 8.23067600 | -5.44171300 | -2.88593800 |
| C | 5.60066000 | -5.74925100 | -0.05275300 |
| H | 4.17045400 | -6.09274400 | -1.62914500 |
| C | 6.93033000 | -5.48095400 | 0.25936600  |
| H | 8.91677300 | -5.15750100 | -0.51429700 |
| H | 4.85805000 | -5.83047000 | 0.73750500  |
| H | 7.23066000 | -5.35538400 | 1.29722600  |
| N | 6.37761200 | -6.87023400 | -4.60769100 |
| H | 3.90003100 | -4.85445700 | -4.05763400 |
| H | 7.19044800 | -7.40783700 | -4.33868000 |
| C | 3.12994700 | -2.96911200 | -0.33839500 |



|   |            |             |              |
|---|------------|-------------|--------------|
| C | 4.25146500 | -2.86040700 | -1.14814200  |
| C | 4.12679700 | -2.86524300 | -2.54425500  |
| C | 2.84135900 | -2.94525000 | -3.10197100  |
| C | 1.71775800 | -3.04020700 | -2.28743800  |
| C | 1.85835900 | -3.05637200 | -0.90354000  |
| H | 3.24701500 | -2.98314100 | 0.74306900   |
| H | 5.24634400 | -2.80139000 | -0.70634200  |
| H | 2.73166700 | -2.90519400 | -4.18636100  |
| H | 0.72927700 | -3.09690700 | -2.73673800  |
| H | 0.98100500 | -3.12984900 | -0.26617200  |
| C | 5.27610000 | -2.68037000 | -3.42480400  |
| C | 5.69428700 | -3.33998000 | -4.47332300  |
| N | 6.26896600 | -3.09107500 | -5.66604200  |
| S | 7.97423700 | -3.38010000 | -5.83337200  |
| O | 8.66004300 | -2.15216600 | -5.45151200  |
| O | 8.22626100 | -4.62010000 | -5.11813200  |
| C | 8.15447100 | -3.58669800 | -7.57615500  |
| C | 8.87927100 | -2.64146600 | -8.29803300  |
| C | 7.57445700 | -4.69117100 | -8.19226700  |
| C | 9.02371600 | -2.82025300 | -9.66685600  |
| H | 9.31744600 | -1.78775000 | -7.78805500  |
| C | 7.72579800 | -4.84525100 | -9.56085500  |
| H | 7.01625500 | -5.41903300 | -7.60986400  |
| C | 8.45396600 | -3.91945900 | -10.31681500 |
| H | 9.58844400 | -2.09255000 | -10.24661400 |
| H | 7.27030100 | -5.70291800 | -10.05412600 |
| C | 8.63902300 | -4.11645900 | -11.78872500 |
| H | 8.79861500 | -3.16597000 | -12.30702300 |
| H | 9.51567000 | -4.74589100 | -11.98664400 |
| H | 7.77534000 | -4.61493800 | -12.24015900 |
| C | 5.77541300 | -1.91247300 | -6.39666100  |
| H | 6.15311100 | -1.93125300 | -7.42325100  |
| H | 4.68338900 | -1.96880800 | -6.41955300  |
| H | 6.07990100 | -0.98561600 | -5.88985900  |
| C | 5.60135700 | 1.80803800  | -4.52814800  |
| C | 5.75128100 | 1.80070400  | -3.13793200  |
| C | 4.75630400 | 1.19974200  | -2.35724100  |
| C | 3.64571800 | 0.60866000  | -2.95274100  |
| C | 3.51033700 | 0.61739800  | -4.33803600  |
| C | 4.48928500 | 1.21889700  | -5.12357200  |
| H | 6.36248100 | 2.29161900  | -5.13974800  |
| H | 4.84508900 | 1.21547400  | -1.27219000  |
| H | 2.88434300 | 0.14186300  | -2.33005800  |
| H | 2.63592400 | 0.16554400  | -4.80200900  |
| H | 4.38123100 | 1.24428800  | -6.20632300  |
| C | 6.87401900 | 2.55341600  | -2.51562300  |
| C | 7.94217000 | 1.99854600  | -1.77594000  |
| C | 6.82313300 | 3.94381600  | -2.68393100  |
| C | 8.88420600 | 2.87310900  | -1.20907600  |
| C | 7.77119100 | 4.78792500  | -2.12614200  |

|    |             |             |             |
|----|-------------|-------------|-------------|
| H  | 5.99696400  | 4.36028300  | -3.25722300 |
| C  | 8.80542300  | 4.24857200  | -1.37209600 |
| H  | 9.70855400  | 2.47297100  | -0.62758300 |
| H  | 7.69620800  | 5.86234400  | -2.27289900 |
| H  | 9.55361800  | 4.89145700  | -0.91593300 |
| P  | 8.23690900  | 0.18663200  | -1.62701400 |
| Au | 6.66246300  | -1.20479800 | -2.75134900 |
| C  | 9.92579900  | -0.15064600 | -2.42700600 |
| C  | 9.82458900  | 0.47378600  | -3.82367400 |
| C  | 11.15155400 | 0.41111900  | -1.71010900 |
| C  | 10.10920600 | -1.66660200 | -2.56536900 |
| H  | 8.95386200  | 0.10258100  | -4.37983500 |
| H  | 9.77939700  | 1.56856100  | -3.78039100 |
| H  | 10.71743000 | 0.19382800  | -4.39856000 |
| H  | 11.28656300 | -0.01710500 | -0.71018100 |
| H  | 12.04154700 | 0.14090700  | -2.29432000 |
| H  | 11.14401600 | 1.50255800  | -1.63512100 |
| H  | 10.99332400 | -1.85037600 | -3.19049100 |
| H  | 10.28409200 | -2.15273000 | -1.59934200 |
| H  | 9.25969800  | -2.15337500 | -3.05764400 |
| C  | 8.13653400  | -0.21766600 | 0.22298200  |
| C  | 8.45426100  | -1.70117000 | 0.42116100  |
| C  | 9.03577000  | 0.61483500  | 1.13617500  |
| C  | 6.68271300  | 0.04286800  | 0.62920300  |
| H  | 7.90469700  | -2.34754100 | -0.27735600 |
| H  | 9.52514300  | -1.90950100 | 0.31257900  |
| H  | 8.17021900  | -1.99120500 | 1.44234800  |
| H  | 8.75079400  | 1.67182700  | 1.14371300  |
| H  | 8.92108900  | 0.24369300  | 2.16358100  |
| H  | 10.09822900 | 0.53786900  | 0.88256500  |
| H  | 6.56465700  | -0.19509400 | 1.69492700  |
| H  | 6.40689000  | 1.09699600  | 0.49655300  |
| H  | 5.97391900  | -0.57720300 | 0.06479600  |

**TS4-b:**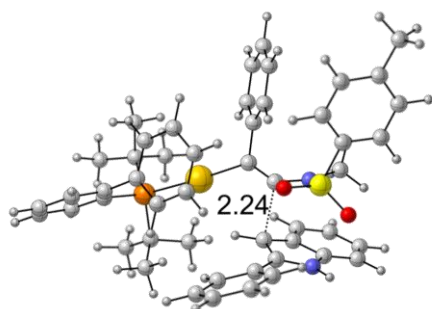

|   |             |             |              |
|---|-------------|-------------|--------------|
| C | 9.18261800  | -6.38111400 | -6.17555800  |
| C | 8.66189400  | -5.09257300 | -6.10470900  |
| C | 8.79890900  | -4.27449200 | -4.96681100  |
| C | 9.49134800  | -4.76387200 | -3.85504200  |
| C | 10.02938300 | -6.04151800 | -3.91971100  |
| C | 9.87383400  | -6.84139100 | -5.06344100  |
| H | 9.06296200  | -6.99516000 | -7.06500500  |
| H | 9.60150600  | -4.15278700 | -2.96028900  |
| H | 10.58461700 | -6.43357300 | -3.07135200  |
| H | 10.30894300 | -7.83717400 | -5.08066900  |
| C | 8.05518700  | -3.06513900 | -5.24262800  |
| C | 7.65830400  | -3.12786500 | -6.58851100  |
| C | 7.05638600  | -2.09546200 | -7.42054900  |
| C | 6.19725000  | -2.41251200 | -8.48016900  |
| C | 7.38030400  | -0.75418400 | -7.18114400  |
| C | 5.66702900  | -1.40529000 | -9.27394200  |
| H | 5.90347800  | -3.44642200 | -8.65517700  |
| C | 6.85548700  | 0.24931900  | -7.98426500  |
| H | 8.07003600  | -0.50598200 | -6.37601500  |
| C | 5.99511500  | -0.07392300 | -9.02999200  |
| H | 4.98994900  | -1.65964400 | -10.08499600 |
| H | 7.12543400  | 1.28671000  | -7.80005200  |
| H | 5.58293500  | 0.71141800  | -9.65833600  |
| N | 7.95770500  | -4.36404300 | -7.05529600  |
| H | 8.10857600  | -2.13730100 | -4.68630600  |
| H | 7.66477200  | -4.72244000 | -7.95456500  |
| C | 4.48038600  | -4.24055200 | 0.11584300   |
| C | 5.42517400  | -3.76667600 | -0.78673900  |
| C | 5.09824800  | -3.60330300 | -2.13972400  |
| C | 3.79569300  | -3.89725900 | -2.55304000  |
| C | 2.84678400  | -4.35311900 | -1.64612200  |
| C | 3.18690700  | -4.53239300 | -0.30882100  |
| H | 4.75414300  | -4.37452600 | 1.15969400   |
| H | 6.43499900  | -3.52825800 | -0.45281200  |
| H | 3.52689700  | -3.72516600 | -3.59157200  |
| H | 1.83648200  | -4.56968600 | -1.98845800  |
| H | 2.44627700  | -4.88995700 | 0.40195200   |
| C | 6.14547800  | -3.13313100 | -3.08793100  |
| C | 6.20814100  | -3.80320500 | -4.22020100  |
| N | 5.83016800  | -4.92309900 | -4.81190700  |
| S | 4.68283500  | -4.89386100 | -6.15028300  |

|    |             |             |             |
|----|-------------|-------------|-------------|
| O  | 4.27941300  | -3.50418600 | -6.26224800 |
| O  | 5.34032700  | -5.59923900 | -7.24279200 |
| C  | 3.31592700  | -5.87705100 | -5.61545700 |
| C  | 2.15111400  | -5.24077600 | -5.19305500 |
| C  | 3.38955400  | -7.26803800 | -5.70540100 |
| C  | 1.06087900  | -6.01549100 | -4.82193700 |
| H  | 2.09339000  | -4.15501900 | -5.18647200 |
| C  | 2.29282400  | -8.02168700 | -5.32025500 |
| H  | 4.28413600  | -7.74836200 | -6.09327900 |
| C  | 1.11610300  | -7.41087600 | -4.87036000 |
| H  | 0.14216700  | -5.52871900 | -4.49970900 |
| H  | 2.33888200  | -9.10744000 | -5.38192400 |
| C  | -0.06639600 | -8.24391500 | -4.48825800 |
| H  | -0.81163100 | -7.66331700 | -3.93705100 |
| H  | -0.55760200 | -8.65078300 | -5.38066800 |
| H  | 0.23076000  | -9.09782300 | -3.87010900 |
| C  | 6.23054800  | -6.24934300 | -4.31571600 |
| H  | 6.52600200  | -6.89241500 | -5.15043400 |
| H  | 7.08980200  | -6.11633800 | -3.65502300 |
| H  | 5.40196500  | -6.69809600 | -3.75425100 |
| C  | 5.61314200  | 0.69382600  | -4.53941400 |
| C  | 5.53813800  | 1.09795800  | -3.20253000 |
| C  | 4.55555900  | 0.53675600  | -2.38022300 |
| C  | 3.67349200  | -0.41501000 | -2.88444900 |
| C  | 3.76450900  | -0.81553400 | -4.21415500 |
| C  | 4.73908000  | -0.26649500 | -5.04094400 |
| H  | 6.36357400  | 1.14525600  | -5.18938400 |
| H  | 4.47435700  | 0.86374200  | -1.34435900 |
| H  | 2.91533400  | -0.84560300 | -2.23349200 |
| H  | 3.08074700  | -1.56098900 | -4.61567800 |
| H  | 4.81718200  | -0.58717300 | -6.07874300 |
| C  | 6.38883600  | 2.21935900  | -2.71341500 |
| C  | 7.57882800  | 2.09394700  | -1.96588300 |
| C  | 5.92947900  | 3.50212400  | -3.03969400 |
| C  | 8.24397700  | 3.26578400  | -1.56767300 |
| C  | 6.60386900  | 4.64640900  | -2.64173700 |
| H  | 5.01091800  | 3.58486800  | -3.61776800 |
| C  | 7.76992000  | 4.52730800  | -1.89525400 |
| H  | 9.15887700  | 3.19660300  | -0.98723200 |
| H  | 6.21862300  | 5.62664100  | -2.91074800 |
| H  | 8.31248100  | 5.41088900  | -1.56946200 |
| P  | 8.33452100  | 0.46602400  | -1.55732700 |
| Au | 7.18402500  | -1.42666500 | -2.43758200 |
| C  | 10.08687600 | 0.48900300  | -2.29600400 |
| C  | 9.94288100  | 1.05908400  | -3.70967200 |
| C  | 11.13416700 | 1.28818200  | -1.52238200 |
| C  | 10.58118400 | -0.95750700 | -2.41233100 |
| H  | 9.16276900  | 0.53384200  | -4.27996800 |
| H  | 9.70074000  | 2.12731700  | -3.70733200 |
| H  | 10.89214500 | 0.92706400  | -4.24563800 |

|   |             |             |             |
|---|-------------|-------------|-------------|
| H | 11.32408800 | 0.87093200  | -0.52679100 |
| H | 12.08265100 | 1.24301500  | -2.07440900 |
| H | 10.88157800 | 2.34771000  | -1.41831200 |
| H | 11.58942600 | -0.95112700 | -2.84784200 |
| H | 10.64313000 | -1.46695700 | -1.44426800 |
| H | 9.93726700  | -1.55532100 | -3.06892700 |
| C | 8.30185200  | 0.32743900  | 0.33037400  |
| C | 9.04928900  | -0.94188000 | 0.74092100  |
| C | 8.87182200  | 1.52298500  | 1.09230200  |
| C | 6.82320900  | 0.18515900  | 0.70604700  |
| H | 8.69498500  | -1.82647300 | 0.19429300  |
| H | 10.13245400 | -0.85265800 | 0.59400200  |
| H | 8.88256300  | -1.12160300 | 1.81139000  |
| H | 8.28741400  | 2.43345200  | 0.92386400  |
| H | 8.82198700  | 1.30198500  | 2.16691600  |
| H | 9.92042100  | 1.72827500  | 0.85335400  |
| H | 6.74178100  | 0.09049600  | 1.79717500  |
| H | 6.24311500  | 1.06801900  | 0.40781900  |
| H | 6.35984400  | -0.70192700 | 0.25380500  |

**IM4:**

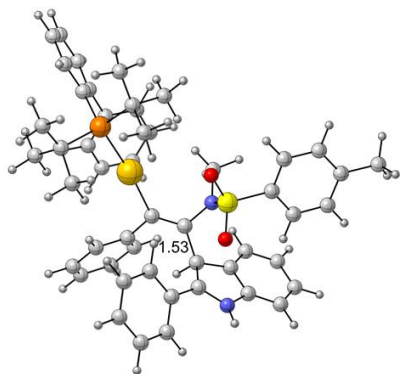

|   |             |             |             |
|---|-------------|-------------|-------------|
| C | -1.89687700 | -5.28257800 | -3.70718000 |
| C | -1.70444000 | -4.57970100 | -2.52973800 |
| C | -2.07342500 | -3.24840800 | -2.35788700 |
| C | -2.65664300 | -2.56308500 | -3.41016800 |
| C | -2.86207000 | -3.24310900 | -4.61026700 |
| C | -2.48851600 | -4.58121900 | -4.75619400 |
| H | -1.60009800 | -6.32255100 | -3.81486400 |
| H | -2.93741600 | -1.51704800 | -3.30211600 |
| H | -3.31798500 | -2.72429300 | -5.44919100 |
| H | -2.66145200 | -5.08628300 | -5.70259000 |
| C | -1.70970400 | -2.82183200 | -0.97020800 |
| C | -1.00688900 | -4.04104500 | -0.43274800 |
| C | -0.49705700 | -4.29073400 | 0.90106000  |
| C | 0.22284000  | -3.31766700 | 1.61230300  |
| C | -0.73168000 | -5.54537700 | 1.49040900  |
| C | 0.70094900  | -3.60911000 | 2.88104100  |
| H | 0.43985400  | -2.35673800 | 1.15425400  |
| C | -0.25959500 | -5.82092000 | 2.76349300  |

|   |             |             |             |
|---|-------------|-------------|-------------|
| H | -1.33448900 | -6.28926600 | 0.97169300  |
| C | 0.46171800  | -4.85310900 | 3.45832500  |
| H | 1.27457900  | -2.85884900 | 3.42000600  |
| H | -0.46125400 | -6.78658800 | 3.21846200  |
| H | 0.83699300  | -5.07056700 | 4.45507700  |
| N | -1.10705700 | -5.01044800 | -1.32422600 |
| H | -2.62704700 | -2.77954000 | -0.34901800 |
| H | -0.67729100 | -5.91993700 | -1.19495200 |
| C | -3.49257800 | -1.12499100 | 3.29922000  |
| C | -2.36278600 | -0.98488100 | 2.50380700  |
| C | -2.47062000 | -0.86982800 | 1.10925400  |
| C | -3.75971900 | -0.87923200 | 0.54953100  |
| C | -4.89191900 | -1.00873000 | 1.34804800  |
| C | -4.76364600 | -1.13290700 | 2.72738900  |
| H | -3.38222400 | -1.21898800 | 4.37725200  |
| H | -1.37446900 | -0.95625400 | 2.96276100  |
| H | -3.86326300 | -0.74707000 | -0.52879700 |
| H | -5.87852500 | -1.00212800 | 0.88993400  |
| H | -5.64624300 | -1.22739000 | 3.35466300  |
| C | -1.29738300 | -0.64397600 | 0.24652700  |
| C | -1.03734400 | -1.46199400 | -0.79351100 |
| N | -0.15034800 | -1.10666500 | -1.86692200 |
| S | 1.38229000  | -1.78931300 | -1.88994200 |
| O | 2.37437700  | -0.90791600 | -1.28070000 |
| O | 1.19882300  | -3.14012500 | -1.35018200 |
| C | 1.73369100  | -1.89246700 | -3.62270500 |
| C | 2.73751300  | -1.10011100 | -4.16832100 |
| C | 0.99180600  | -2.76861100 | -4.41209800 |
| C | 2.99755100  | -1.19169900 | -5.53015000 |
| H | 3.30092000  | -0.42737700 | -3.52643300 |
| C | 1.26301400  | -2.84221900 | -5.76872300 |
| H | 0.21429800  | -3.38451500 | -3.96578800 |
| C | 2.26967300  | -2.05993400 | -6.34737800 |
| H | 3.78066800  | -0.57716100 | -5.97052100 |
| H | 0.68535400  | -3.52015600 | -6.39591900 |
| C | 2.57569800  | -2.17288000 | -7.80856600 |
| H | 3.01951800  | -1.25252800 | -8.20053000 |
| H | 3.29176400  | -2.98339300 | -7.99347000 |
| H | 1.67705900  | -2.39689900 | -8.39248700 |
| C | -0.23574800 | 0.24155600  | -2.42649700 |
| H | 0.18168500  | 0.24121200  | -3.44039500 |
| H | -1.29414400 | 0.51523000  | -2.47574300 |
| H | 0.27923300  | 0.99695200  | -1.81756500 |
| C | -1.33826000 | 3.87027800  | -0.70643900 |
| C | -1.15807500 | 3.84117700  | 0.67871400  |
| C | -2.09116900 | 3.15794900  | 1.46797400  |
| C | -3.17591400 | 2.51237600  | 0.88383400  |
| C | -3.34271800 | 2.54351700  | -0.49807800 |
| C | -2.42179600 | 3.22038000  | -1.29167800 |
| H | -0.62825500 | 4.42149800  | -1.32235200 |

|    |             |             |             |
|----|-------------|-------------|-------------|
| H  | -1.97238400 | 3.15503000  | 2.55107100  |
| H  | -3.89055900 | 1.98100600  | 1.50998600  |
| H  | -4.19859500 | 2.04827800  | -0.95214600 |
| H  | -2.55578700 | 3.26186200  | -2.37080700 |
| C  | -0.08817300 | 4.66144400  | 1.30889100  |
| C  | 1.06909600  | 4.16899000  | 1.95052500  |
| C  | -0.30434800 | 6.04563700  | 1.27141700  |
| C  | 1.92835300  | 5.09420800  | 2.56652100  |
| C  | 0.56386200  | 6.94113100  | 1.87650900  |
| H  | -1.19699000 | 6.41066100  | 0.76671800  |
| C  | 1.68383600  | 6.45951500  | 2.54229700  |
| H  | 2.82538900  | 4.74564700  | 3.06738400  |
| H  | 0.36093300  | 8.00830500  | 1.83606900  |
| H  | 2.37261900  | 7.14115100  | 3.03456500  |
| P  | 1.53758300  | 2.38425600  | 1.94179400  |
| Au | -0.02388700 | 0.88533300  | 0.90822700  |
| C  | 3.17745500  | 2.29481300  | 0.99381200  |
| C  | 2.79802000  | 2.52997000  | -0.47270700 |
| C  | 4.24479800  | 3.31666300  | 1.38154300  |
| C  | 3.75388700  | 0.88556200  | 1.13891100  |
| H  | 2.18968100  | 1.70698200  | -0.86600800 |
| H  | 2.25892800  | 3.47705000  | -0.61307100 |
| H  | 3.71730000  | 2.57882700  | -1.07240200 |
| H  | 4.52909500  | 3.26743200  | 2.43855100  |
| H  | 5.14865200  | 3.10243400  | 0.79535900  |
| H  | 3.94211800  | 4.34214000  | 1.14607300  |
| H  | 4.55573400  | 0.75703100  | 0.39919600  |
| H  | 4.19709000  | 0.72432700  | 2.12931400  |
| H  | 3.01091300  | 0.10391100  | 0.93767700  |
| C  | 1.68402000  | 1.85626500  | 3.76360900  |
| C  | 1.75377600  | 0.32639400  | 3.83363500  |
| C  | 2.87561200  | 2.42436800  | 4.53203200  |
| C  | 0.38291900  | 2.30275600  | 4.43623200  |
| H  | 0.90061400  | -0.14136000 | 3.32511300  |
| H  | 2.67190100  | -0.07630700 | 3.39371100  |
| H  | 1.72963700  | 0.02337600  | 4.88971900  |
| H  | 2.84899300  | 3.51528900  | 4.61359500  |
| H  | 2.84944200  | 2.03149800  | 5.55764900  |
| H  | 3.83594200  | 2.12343400  | 4.09788400  |
| H  | 0.38057600  | 1.95166200  | 5.47693600  |
| H  | 0.27398000  | 3.39357100  | 4.45117500  |
| H  | -0.49747700 | 1.87178800  | 3.93909900  |

**IM4-b:**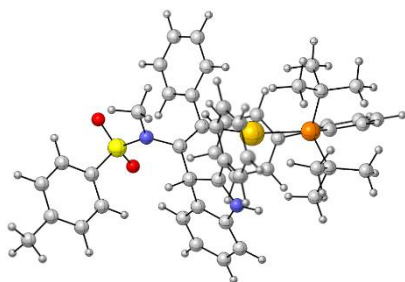

|   |             |             |             |
|---|-------------|-------------|-------------|
| C | 2.95804800  | -2.64520700 | -1.40300100 |
| C | 1.66836600  | -2.14770600 | -1.48171200 |
| C | 1.30350100  | -1.02143900 | -2.21580100 |
| C | 2.28416200  | -0.34167100 | -2.92348400 |
| C | 3.59130200  | -0.83106000 | -2.87819500 |
| C | 3.92809100  | -1.95984600 | -2.12924200 |
| H | 3.19957400  | -3.52776400 | -0.81499200 |
| H | 2.03901600  | 0.56115300  | -3.47754900 |
| H | 4.36853300  | -0.31119400 | -3.43272400 |
| H | 4.95645300  | -2.30994300 | -2.11206100 |
| C | -0.19171100 | -0.82584800 | -2.08286500 |
| C | -0.56365800 | -1.90778300 | -1.09565000 |
| C | -1.87108400 | -2.31978900 | -0.61355800 |
| C | -2.12203800 | -3.68912600 | -0.40847500 |
| C | -2.88588000 | -1.39131600 | -0.33041100 |
| C | -3.34679600 | -4.11442500 | 0.08072400  |
| H | -1.37350800 | -4.43207100 | -0.68001200 |
| C | -4.10911800 | -1.82568400 | 0.15850300  |
| H | -2.68456000 | -0.33130300 | -0.44816300 |
| C | -4.34115500 | -3.18221600 | 0.37016800  |
| H | -3.53363200 | -5.17545200 | 0.22079000  |
| H | -4.88274000 | -1.09736500 | 0.38668900  |
| H | -5.30162900 | -3.51622200 | 0.75400600  |
| N | 0.50717800  | -2.64306000 | -0.85341800 |
| H | -0.66351300 | -1.17221700 | -3.02548200 |
| H | 0.51181400  | -3.41649800 | -0.19479200 |
| C | -1.27798800 | 4.87432200  | -0.90893500 |
| C | -0.75369700 | 3.60795700  | -1.14213800 |
| C | -1.16199400 | 2.51180500  | -0.37142700 |
| C | -2.09265100 | 2.73331400  | 0.65596700  |
| C | -2.62359600 | 3.99761500  | 0.88147700  |
| C | -2.21639200 | 5.07474600  | 0.09865800  |
| H | -0.95348800 | 5.70771700  | -1.52747200 |
| H | -0.00340500 | 3.46633400  | -1.91677100 |
| H | -2.40709100 | 1.89403700  | 1.27831000  |
| H | -3.35421100 | 4.14359400  | 1.67401800  |
| H | -2.62690300 | 6.06566500  | 0.27585800  |
| C | -0.62693400 | 1.15555200  | -0.60433300 |
| C | -0.73571800 | 0.57631300  | -1.81960500 |
| N | -1.48366700 | 1.14402100  | -2.90560600 |
| S | -0.77706700 | 2.03873500  | -4.13604400 |



|    |             |             |             |
|----|-------------|-------------|-------------|
| O  | -1.52308200 | 3.27349700  | -4.31537200 |
| O  | 0.65257200  | 2.05828400  | -3.84057300 |
| C  | -1.03807500 | 1.04604400  | -5.58601100 |
| C  | -2.03688500 | 1.39964700  | -6.48633500 |
| C  | -0.25149500 | -0.08571300 | -5.79375500 |
| C  | -2.25449200 | 0.59891500  | -7.60130900 |
| H  | -2.61965100 | 2.30155400  | -6.31571000 |
| C  | -0.48214500 | -0.87177200 | -6.91251400 |
| H  | 0.55135800  | -0.33318700 | -5.09987900 |
| C  | -1.48466200 | -0.54263700 | -7.83216000 |
| H  | -3.03284900 | 0.86924900  | -8.31280600 |
| H  | 0.13248100  | -1.75310400 | -7.08963100 |
| C  | -1.69995500 | -1.37793900 | -9.05629800 |
| H  | -1.46159200 | -2.43088700 | -8.87383200 |
| H  | -2.73399200 | -1.31617000 | -9.40974000 |
| H  | -1.05593700 | -1.03804700 | -9.87697900 |
| C  | -2.93657900 | 1.21284700  | -2.80114900 |
| H  | -3.36409800 | 1.56408000  | -3.74437000 |
| H  | -3.34072300 | 0.21158000  | -2.60315100 |
| H  | -3.25156500 | 1.90555200  | -2.00808500 |
| C  | 3.27001300  | 0.97501900  | 1.29268900  |
| C  | 2.62334000  | 1.71634200  | 2.28682400  |
| C  | 2.03056900  | 2.93584400  | 1.94483500  |
| C  | 2.06177100  | 3.39201200  | 0.63012900  |
| C  | 2.69090200  | 2.63895500  | -0.35663100 |
| C  | 3.30057000  | 1.43336900  | -0.02012800 |
| H  | 3.76482000  | 0.04061100  | 1.55648900  |
| H  | 1.54145800  | 3.52563100  | 2.71985500  |
| H  | 1.58158900  | 4.33413000  | 0.37624500  |
| H  | 2.70145600  | 2.98681200  | -1.38800900 |
| H  | 3.80580300  | 0.84408800  | -0.78247200 |
| C  | 2.68113000  | 1.28402000  | 3.70816500  |
| C  | 1.94305200  | 0.21959200  | 4.26851200  |
| C  | 3.57022200  | 1.99431600  | 4.52485300  |
| C  | 2.16624200  | -0.10971200 | 5.61628900  |
| C  | 3.76383200  | 1.66340500  | 5.85727500  |
| H  | 4.12712300  | 2.81728900  | 4.08082800  |
| C  | 3.06537600  | 0.59362400  | 6.40433900  |
| H  | 1.62231800  | -0.93190000 | 6.07006800  |
| H  | 4.46355100  | 2.23307800  | 6.46345200  |
| H  | 3.21154400  | 0.30969800  | 7.44324000  |
| P  | 0.60290100  | -0.63642800 | 3.34005600  |
| Au | 0.11190700  | 0.24808700  | 1.13285100  |
| C  | 1.10436800  | -2.46295000 | 3.26051000  |
| C  | 2.29673900  | -2.50695100 | 2.30020500  |
| C  | 1.53583400  | -3.11392300 | 4.57344400  |
| C  | -0.05976700 | -3.25970800 | 2.66908100  |
| H  | 2.07103100  | -2.04319100 | 1.33055600  |
| H  | 3.16717500  | -1.98656500 | 2.71925900  |
| H  | 2.59140900  | -3.55424400 | 2.13524400  |

|   |             |             |            |
|---|-------------|-------------|------------|
| H | 0.75699200  | -3.08743500 | 5.34258400 |
| H | 1.76468100  | -4.17117200 | 4.37991400 |
| H | 2.44422100  | -2.65698400 | 4.97845700 |
| H | 0.29743500  | -4.25743400 | 2.36994400 |
| H | -0.86300000 | -3.42007300 | 3.39800300 |
| H | -0.50375300 | -2.76415100 | 1.79490400 |
| C | -0.98747500 | -0.33767900 | 4.34592700 |
| C | -2.19794200 | -0.70852500 | 3.48053500 |
| C | -1.11221000 | -1.08379400 | 5.67270100 |
| C | -1.02177500 | 1.17309700  | 4.60309600 |
| H | -2.20409600 | -0.16725900 | 2.52621100 |
| H | -2.25176500 | -1.78065600 | 3.25850500 |
| H | -3.11241200 | -0.44154000 | 4.02749800 |
| H | -0.32135300 | -0.83147900 | 6.38482700 |
| H | -2.06216300 | -0.79638100 | 6.14347500 |
| H | -1.13919800 | -2.17195100 | 5.54101700 |
| H | -1.99255600 | 1.43641100  | 5.04379500 |
| H | -0.23943700 | 1.49196600  | 5.30091600 |
| H | -0.90977900 | 1.75295400  | 3.67571100 |

**TS5:**

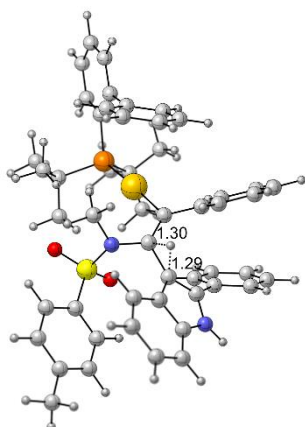

|   |             |             |             |
|---|-------------|-------------|-------------|
| C | -1.72603800 | -5.19936900 | -3.83513000 |
| C | -1.52343800 | -4.36165900 | -2.74280000 |
| C | -1.34556400 | -2.97231400 | -2.86947500 |
| C | -1.40562500 | -2.39125500 | -4.13931700 |
| C | -1.60104500 | -3.21745500 | -5.23438400 |
| C | -1.75656200 | -4.60470000 | -5.08680700 |
| H | -1.85731400 | -6.27148100 | -3.71147900 |
| H | -1.27085200 | -1.31971100 | -4.26964600 |
| H | -1.62982200 | -2.78321100 | -6.23088600 |
| H | -1.91182600 | -5.22234000 | -5.96766900 |
| C | -1.15529200 | -2.45962500 | -1.51765200 |
| C | -1.20141600 | -3.56131700 | -0.64496600 |
| C | -0.97882900 | -3.68255100 | 0.79429400  |
| C | 0.17361100  | -3.13843200 | 1.37475800  |
| C | -1.88442700 | -4.40405700 | 1.57874900  |
| C | 0.41339800  | -3.33474300 | 2.72883900  |
| H | 0.88191500  | -2.58585300 | 0.75739500  |
| C | -1.64250200 | -4.58094300 | 2.93611000  |

|   |             |             |             |
|---|-------------|-------------|-------------|
| H | -2.79370000 | -4.79958500 | 1.12739500  |
| C | -0.49112900 | -4.05130400 | 3.51037800  |
| H | 1.32162400  | -2.93514800 | 3.17487000  |
| H | -2.35250900 | -5.13532300 | 3.54440500  |
| H | -0.29484700 | -4.20135400 | 4.56918000  |
| N | -1.44753200 | -4.66931300 | -1.39213800 |
| H | -1.97235200 | -1.45991400 | -1.49058100 |
| H | -1.44211500 | -5.60289500 | -1.00272700 |
| C | -3.34243600 | -1.31212500 | 2.98460600  |
| C | -2.23539300 | -0.93107600 | 2.24163800  |
| C | -2.31305100 | -0.80319400 | 0.84439900  |
| C | -3.56517100 | -0.99578800 | 0.23442800  |
| C | -4.67975700 | -1.35268500 | 0.98301600  |
| C | -4.56987900 | -1.52585500 | 2.35955200  |
| H | -3.25078500 | -1.43202200 | 4.06154600  |
| H | -1.28032700 | -0.75234400 | 2.73428200  |
| H | -3.68665300 | -0.79715100 | -0.83240700 |
| H | -5.64142500 | -1.47801000 | 0.49147200  |
| H | -5.44231800 | -1.80147400 | 2.94637400  |
| C | -1.14010500 | -0.39777800 | 0.07166000  |
| C | -0.81825500 | -0.99085400 | -1.13575600 |
| N | -0.01524700 | -0.35831100 | -2.11370700 |
| S | 1.64417300  | -0.74003000 | -2.14666200 |
| O | 2.33893100  | 0.51751700  | -2.38315400 |
| O | 1.90702700  | -1.54971500 | -0.96349800 |
| C | 1.84330200  | -1.76207500 | -3.57649100 |
| C | 1.98678700  | -1.16024000 | -4.82268500 |
| C | 1.78630900  | -3.14727700 | -3.44057000 |
| C | 2.04921400  | -1.96618900 | -5.95262600 |
| H | 2.07241700  | -0.07885600 | -4.90100300 |
| C | 1.85592700  | -3.93311800 | -4.57971800 |
| H | 1.69530200  | -3.59186900 | -2.45165100 |
| C | 1.97204400  | -3.35699400 | -5.84960700 |
| H | 2.16609100  | -1.50933500 | -6.93360500 |
| H | 1.81072000  | -5.01775700 | -4.49079400 |
| C | 1.99575100  | -4.22738300 | -7.06715400 |
| H | 2.22897000  | -3.65829500 | -7.97172500 |
| H | 2.73488300  | -5.03042400 | -6.97026600 |
| H | 1.01987100  | -4.70805000 | -7.21534700 |
| C | -0.41968000 | 0.94613400  | -2.63683400 |
| H | 0.09472200  | 1.14029500  | -3.58260200 |
| H | -1.49876000 | 0.90972000  | -2.82707900 |
| H | -0.21415700 | 1.76984800  | -1.93946100 |
| C | -1.43745800 | 4.18895900  | -0.10386000 |
| C | -1.24493200 | 3.91924900  | 1.25370500  |
| C | -2.13427400 | 3.05603000  | 1.90457200  |
| C | -3.18869600 | 2.47041000  | 1.21017000  |
| C | -3.36629600 | 2.73914400  | -0.14416700 |
| C | -2.48752400 | 3.59613100  | -0.80027500 |
| H | -0.76618400 | 4.88302300  | -0.60851400 |

|    |             |             |             |
|----|-------------|-------------|-------------|
| H  | -2.00367700 | 2.86021600  | 2.96895800  |
| H  | -3.87445600 | 1.80406100  | 1.73012400  |
| H  | -4.19868900 | 2.29029000  | -0.68250100 |
| H  | -2.63086400 | 3.82379800  | -1.85464800 |
| C  | -0.21559900 | 4.67042200  | 2.02625200  |
| C  | 1.04632800  | 4.18237200  | 2.42620200  |
| C  | -0.57956200 | 5.97625500  | 2.38044300  |
| C  | 1.87336300  | 5.02459300  | 3.18771500  |
| C  | 0.25351500  | 6.79157700  | 3.13118400  |
| H  | -1.55304400 | 6.34207500  | 2.05899700  |
| C  | 1.48849700  | 6.30819600  | 3.54531000  |
| H  | 2.85240300  | 4.67724200  | 3.50248100  |
| H  | -0.06235000 | 7.79787700  | 3.39414700  |
| H  | 2.15602000  | 6.92782600  | 4.13836200  |
| P  | 1.67619800  | 2.51902300  | 1.94563100  |
| Au | 0.09028300  | 1.09286300  | 0.85854700  |
| C  | 3.13222500  | 2.84256800  | 0.78157300  |
| C  | 2.50343100  | 3.38277600  | -0.50668900 |
| C  | 4.15675300  | 3.86119600  | 1.27821100  |
| C  | 3.83339200  | 1.51605900  | 0.48564700  |
| H  | 1.85850800  | 2.63998500  | -0.99067600 |
| H  | 1.92884300  | 4.30115500  | -0.32595400 |
| H  | 3.30592600  | 3.62535900  | -1.21614400 |
| H  | 4.62213700  | 3.57957400  | 2.22892200  |
| H  | 4.96019600  | 3.92642400  | 0.53241800  |
| H  | 3.72774800  | 4.86363800  | 1.37983200  |
| H  | 4.53099600  | 1.66698900  | -0.34883300 |
| H  | 4.42016200  | 1.16105600  | 1.34189400  |
| H  | 3.13680200  | 0.72727200  | 0.17660800  |
| C  | 2.16924900  | 1.62276500  | 3.54921700  |
| C  | 2.27466900  | 0.12134500  | 3.25088400  |
| C  | 3.48132800  | 2.07097200  | 4.19136100  |
| C  | 1.01546300  | 1.83513600  | 4.53252200  |
| H  | 1.32150700  | -0.29213000 | 2.89654600  |
| H  | 3.03819000  | -0.11476100 | 2.50173900  |
| H  | 2.54556200  | -0.39998000 | 4.17986800  |
| H  | 3.47907100  | 3.12292300  | 4.49253200  |
| H  | 3.63897200  | 1.48320100  | 5.10587400  |
| H  | 4.34578400  | 1.89148700  | 3.54230100  |
| H  | 1.19145600  | 1.22153300  | 5.42631700  |
| H  | 0.92619400  | 2.87884300  | 4.85367500  |
| H  | 0.05278900  | 1.52484700  | 4.10175900  |

**IM5:**

|   |             |             |             |
|---|-------------|-------------|-------------|
| C | -1.79293200 | -5.03041000 | -4.06364400 |
| C | -1.49761400 | -4.21556100 | -2.97235300 |
| C | -1.40485800 | -2.81169500 | -3.07821200 |
| C | -1.64157300 | -2.20584700 | -4.31877500 |
| C | -1.95100800 | -3.00667300 | -5.40491700 |
| C | -2.02094000 | -4.40460400 | -5.27931400 |
| H | -1.85451000 | -6.11170000 | -3.96348600 |
| H | -1.56352300 | -1.12500800 | -4.43418100 |
| H | -2.13759300 | -2.55079700 | -6.37409200 |
| H | -2.26624200 | -5.00657000 | -6.15108500 |
| C | -1.08007600 | -2.30860400 | -1.77164600 |
| C | -1.00201200 | -3.39495300 | -0.92130000 |
| C | -0.82521600 | -3.52180900 | 0.53254200  |
| C | 0.27730500  | -2.98282100 | 1.20381300  |
| C | -1.80267600 | -4.20981100 | 1.26456000  |
| C | 0.39140500  | -3.13419000 | 2.58370200  |
| H | 1.04804600  | -2.46108900 | 0.64096000  |
| C | -1.68865400 | -4.34523100 | 2.64216400  |
| H | -2.67178000 | -4.61355600 | 0.74614700  |
| C | -0.58766000 | -3.80794600 | 3.30602800  |
| H | 1.26554300  | -2.73557000 | 3.09451200  |
| H | -2.45815400 | -4.87436000 | 3.19931500  |
| H | -0.48920900 | -3.92650800 | 4.38237100  |
| N | -1.26282300 | -4.53547500 | -1.65366900 |
| H | -1.91215300 | -0.40387000 | -1.98064700 |
| H | -1.19254100 | -5.46763300 | -1.27300000 |
| C | -3.62680000 | -1.02043900 | 2.70301800  |
| C | -2.48887400 | -0.64983300 | 2.00620800  |
| C | -2.40460200 | -0.80433200 | 0.60242000  |
| C | -3.54066100 | -1.31309500 | -0.07920400 |
| C | -4.69338000 | -1.62751500 | 0.61185200  |
| C | -4.73346300 | -1.49426400 | 2.00402100  |
| H | -3.66172400 | -0.92198600 | 3.78440800  |
| H | -1.62028900 | -0.25756200 | 2.53407300  |
| H | -3.52070700 | -1.44346800 | -1.15887300 |
| H | -5.56725400 | -1.98825700 | 0.07624900  |
| H | -5.64024300 | -1.75997600 | 2.54266100  |
| C | -1.19413200 | -0.41676700 | -0.05785600 |
| C | -1.01046600 | -0.83217400 | -1.48882400 |
| N | 0.07537900  | -0.14975100 | -2.20770500 |
| S | 1.67137200  | -0.66509300 | -2.13536900 |

|    |             |             |             |
|----|-------------|-------------|-------------|
| O  | 2.45910300  | 0.45650900  | -2.63112700 |
| O  | 1.92578800  | -1.20052400 | -0.79972600 |
| C  | 1.80077000  | -2.00228500 | -3.28508900 |
| C  | 1.70391500  | -1.71955100 | -4.64508600 |
| C  | 1.95380500  | -3.30431100 | -2.82367600 |
| C  | 1.73194700  | -2.76786200 | -5.55074300 |
| H  | 1.60838700  | -0.69028800 | -4.98628100 |
| C  | 1.97723500  | -4.34079000 | -3.74679300 |
| H  | 2.04361300  | -3.49498100 | -1.75710500 |
| C  | 1.84923500  | -4.09215400 | -5.11562300 |
| H  | 1.65037500  | -2.56287900 | -6.61678800 |
| H  | 2.09079200  | -5.36715200 | -3.40082500 |
| C  | 1.79553300  | -5.22165800 | -6.09556800 |
| H  | 2.21311300  | -4.93734300 | -7.06669600 |
| H  | 2.33674400  | -6.10110500 | -5.73251100 |
| H  | 0.75265400  | -5.52324500 | -6.26405000 |
| C  | -0.22943600 | 1.14887200  | -2.79433200 |
| H  | 0.60492900  | 1.48169500  | -3.41337000 |
| H  | -1.12574800 | 1.06580400  | -3.42493400 |
| H  | -0.40916000 | 1.91267600  | -2.02246800 |
| C  | -1.46479800 | 3.59953700  | 0.18780600  |
| C  | -1.43853900 | 3.59793700  | 1.58708500  |
| C  | -2.51282100 | 3.02519900  | 2.27677200  |
| C  | -3.58321900 | 2.46242600  | 1.58803400  |
| C  | -3.60361300 | 2.47592300  | 0.19616200  |
| C  | -2.54194000 | 3.04447400  | -0.50129800 |
| H  | -0.65262300 | 4.07593900  | -0.36074900 |
| H  | -2.50822200 | 3.04109400  | 3.36644000  |
| H  | -4.41434800 | 2.02916200  | 2.14041600  |
| H  | -4.45267000 | 2.05951900  | -0.34167200 |
| H  | -2.56269300 | 3.08345100  | -1.58902800 |
| C  | -0.39707200 | 4.34682700  | 2.34231100  |
| C  | 0.97009500  | 4.01095900  | 2.45279400  |
| C  | -0.86040300 | 5.50672000  | 2.97933400  |
| C  | 1.80829500  | 4.87636100  | 3.17591300  |
| C  | -0.01598000 | 6.34178300  | 3.69421100  |
| H  | -1.91581400 | 5.75588300  | 2.88632600  |
| C  | 1.33386500  | 6.02797100  | 3.78607800  |
| H  | 2.86313100  | 4.64344000  | 3.27623500  |
| H  | -0.41012700 | 7.23564700  | 4.17071600  |
| H  | 2.01728400  | 6.67027600  | 4.33513200  |
| P  | 1.68596500  | 2.42145100  | 1.85290300  |
| Au | 0.12228400  | 0.92392500  | 0.80450600  |
| C  | 3.07332300  | 2.84622400  | 0.63738000  |
| C  | 2.36780300  | 3.33477100  | -0.63100200 |
| C  | 4.04507300  | 3.93477800  | 1.09023800  |
| C  | 3.85412100  | 1.56954500  | 0.32186900  |
| H  | 1.74708400  | 2.55151300  | -1.08215800 |
| H  | 1.75268800  | 4.22444700  | -0.43792900 |
| H  | 3.12706800  | 3.61055700  | -1.37467600 |

|   |            |             |             |
|---|------------|-------------|-------------|
| H | 4.55916400 | 3.69348800  | 2.02709600  |
| H | 4.81826000 | 4.03916200  | 0.31757500  |
| H | 3.55828200 | 4.91027900  | 1.19312000  |
| H | 4.50416700 | 1.76180400  | -0.54177900 |
| H | 4.49966700 | 1.26832100  | 1.15590500  |
| H | 3.20623900 | 0.72816600  | 0.04939600  |
| C | 2.28814100 | 1.52084200  | 3.41646800  |
| C | 2.46900000 | 0.03701200  | 3.07550100  |
| C | 3.58979100 | 2.04195000  | 4.02205000  |
| C | 1.15850100 | 1.64289900  | 4.44331500  |
| H | 1.52825200 | -0.41788300 | 2.73779600  |
| H | 3.22131000 | -0.13866000 | 2.29950000  |
| H | 2.79412000 | -0.49255500 | 3.98211900  |
| H | 3.52400000 | 3.08500700  | 4.34676300  |
| H | 3.82008400 | 1.44724800  | 4.91633000  |
| H | 4.44008700 | 1.93584900  | 3.33888500  |
| H | 1.38916000 | 0.99844700  | 5.30208300  |
| H | 1.03842900 | 2.66704700  | 4.81376200  |
| H | 0.19362900 | 1.31365800  | 4.03038300  |

**TS5-b:**

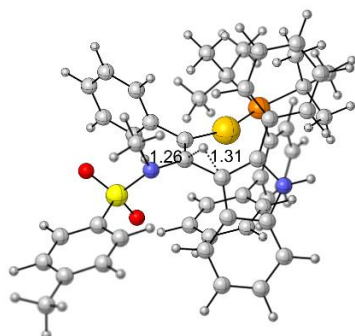

|   |             |             |             |
|---|-------------|-------------|-------------|
| C | 3.16678200  | -4.84329800 | -2.72823800 |
| C | 2.01584300  | -4.41369600 | -2.07543700 |
| C | 1.40053200  | -3.17512300 | -2.33325600 |
| C | 2.00702400  | -2.30108600 | -3.24157900 |
| C | 3.15191200  | -2.71911000 | -3.90154400 |
| C | 3.71900300  | -3.97946800 | -3.66039500 |
| H | 3.61990700  | -5.80589600 | -2.50474500 |
| H | 1.61632800  | -1.30079000 | -3.39583700 |
| H | 3.62830000  | -2.04905600 | -4.61232300 |
| H | 4.61752100  | -4.27421000 | -4.19570800 |
| C | 0.29341700  | -3.06739200 | -1.40202300 |
| C | 0.27022200  | -4.26065900 | -0.63980000 |
| C | -0.67823500 | -4.83045900 | 0.32568400  |
| C | -0.21219800 | -5.76465400 | 1.26108200  |
| C | -2.05267400 | -4.55708100 | 0.28899400  |
| C | -1.08931600 | -6.40875500 | 2.12414000  |
| H | 0.85462600  | -5.97106000 | 1.33765700  |
| C | -2.92576600 | -5.19144800 | 1.16076900  |
| H | -2.46343700 | -3.86006000 | -0.43999600 |
| C | -2.44929600 | -6.12471500 | 2.07830800  |

|   |             |             |             |
|---|-------------|-------------|-------------|
| H | -0.70380000 | -7.13063700 | 2.84042900  |
| H | -3.98873500 | -4.97162600 | 1.10797700  |
| H | -3.13747100 | -6.62895400 | 2.75157800  |
| N | 1.31435500  | -5.02926000 | -1.05146600 |
| H | -1.01787800 | -3.00421300 | -1.45268800 |
| H | 1.42738500  | -5.99627400 | -0.78047300 |
| C | -2.08044300 | 2.17805500  | 0.83339700  |
| C | -1.20695100 | 1.12691000  | 0.59655600  |
| C | -1.70265200 | -0.13289900 | 0.23213400  |
| C | -3.08873700 | -0.32757700 | 0.17038700  |
| C | -3.95795500 | 0.72336200  | 0.44170200  |
| C | -3.45749000 | 1.98078600  | 0.76041200  |
| H | -1.68405300 | 3.15972400  | 1.08109500  |
| H | -0.12888000 | 1.27399600  | 0.65612500  |
| H | -3.48447000 | -1.31904900 | -0.04904100 |
| H | -5.03177100 | 0.55727300  | 0.40062700  |
| H | -4.13831400 | 2.80454500  | 0.95805000  |
| C | -0.78436900 | -1.26782900 | 0.05072900  |
| C | -0.63227800 | -1.83049300 | -1.20551500 |
| N | -1.12131200 | -1.26466000 | -2.44835600 |
| S | -0.66795000 | 0.31738000  | -2.86900300 |
| O | -1.73400800 | 1.25887100  | -2.56604300 |
| O | 0.65814100  | 0.50422300  | -2.28979100 |
| C | -0.57465000 | 0.21758000  | -4.64595000 |
| C | -0.80776300 | 1.40765200  | -5.33475700 |
| C | -0.24373400 | -0.94924100 | -5.33058400 |
| C | -0.68310400 | 1.42550900  | -6.71569300 |
| H | -1.09737300 | 2.30191800  | -4.78916600 |
| C | -0.13602100 | -0.91307000 | -6.71473000 |
| H | -0.09476900 | -1.88189000 | -4.79200700 |
| C | -0.34193900 | 0.27112400  | -7.42671500 |
| H | -0.86462800 | 2.35169700  | -7.25821000 |
| H | 0.10781800  | -1.82537600 | -7.25632600 |
| C | -0.19430200 | 0.31174500  | -8.91587600 |
| H | -0.25826600 | -0.68752400 | -9.35709900 |
| H | -0.96333400 | 0.94012300  | -9.37729000 |
| H | 0.77756200  | 0.73485400  | -9.19886800 |
| C | -2.46814700 | -1.63861800 | -2.88789000 |
| H | -2.63200600 | -1.29894900 | -3.91510100 |
| H | -2.54698500 | -2.73453200 | -2.89602100 |
| H | -3.25011300 | -1.21302200 | -2.24754100 |
| C | 3.28447200  | -1.76119100 | 1.58273600  |
| C | 3.03949600  | -0.60735800 | 2.33454700  |
| C | 2.76578500  | 0.59195500  | 1.66920400  |
| C | 2.71938600  | 0.63444400  | 0.27952300  |
| C | 2.97112700  | -0.51629100 | -0.46019900 |
| C | 3.25465600  | -1.71285700 | 0.19088800  |
| H | 3.52598300  | -2.69150100 | 2.09635000  |
| H | 2.59588800  | 1.49514300  | 2.25545100  |
| H | 2.49073300  | 1.56546300  | -0.23421900 |



|    |             |             |             |
|----|-------------|-------------|-------------|
| H  | 2.93557400  | -0.47652500 | -1.54525700 |
| H  | 3.46610300  | -2.61012600 | -0.39118500 |
| C  | 3.20465500  | -0.60035600 | 3.81250100  |
| C  | 2.27343800  | -1.10307400 | 4.74421000  |
| C  | 4.39154500  | -0.02457300 | 4.28402600  |
| C  | 2.58571900  | -1.01564600 | 6.11143600  |
| C  | 4.68104100  | 0.05158100  | 5.63775700  |
| H  | 5.09804900  | 0.36398100  | 3.55290000  |
| C  | 3.77153200  | -0.45248600 | 6.55947900  |
| H  | 1.88495800  | -1.38764100 | 6.85155800  |
| H  | 5.61224700  | 0.50261100  | 5.97099500  |
| H  | 3.97755100  | -0.40282500 | 7.62549900  |
| P  | 0.62022000  | -1.74072800 | 4.24507100  |
| Au | 0.08967100  | -1.69970600 | 1.89335600  |
| C  | 0.51261800  | -3.51169400 | 4.90276100  |
| C  | 1.49761100  | -4.30895000 | 4.04255200  |
| C  | 0.88307500  | -3.73116100 | 6.36911100  |
| C  | -0.90967900 | -4.02033400 | 4.66813200  |
| H  | 1.26535900  | -4.22560200 | 2.97261200  |
| H  | 2.53092900  | -3.97365200 | 4.20064000  |
| H  | 1.44611200  | -5.37055400 | 4.32431900  |
| H  | 0.27047800  | -3.14530200 | 7.06240200  |
| H  | 0.71831200  | -4.79051600 | 6.60887600  |
| H  | 1.93882400  | -3.51924900 | 6.56486100  |
| H  | -0.93958100 | -5.10081000 | 4.86677400  |
| H  | -1.62928600 | -3.54872800 | 5.34814400  |
| H  | -1.24855400 | -3.86223000 | 3.63517400  |
| C  | -0.63910300 | -0.54628200 | 5.03117200  |
| C  | -2.00403800 | -0.73119500 | 4.35667200  |
| C  | -0.82663300 | -0.68798500 | 6.54020900  |
| C  | -0.13435600 | 0.86297600  | 4.70568500  |
| H  | -1.96858700 | -0.52149500 | 3.27994700  |
| H  | -2.41618300 | -1.73649800 | 4.49501300  |
| H  | -2.71088300 | -0.02150400 | 4.80741000  |
| H  | 0.09672800  | -0.52768500 | 7.10532000  |
| H  | -1.53865000 | 0.07834500  | 6.87501000  |
| H  | -1.25016000 | -1.66014800 | 6.81865400  |
| H  | -0.90192600 | 1.58950800  | 5.00392000  |
| H  | 0.79012500  | 1.11019000  | 5.23976900  |
| H  | 0.04046000  | 0.99417000  | 3.62877300  |

**IM5-b:**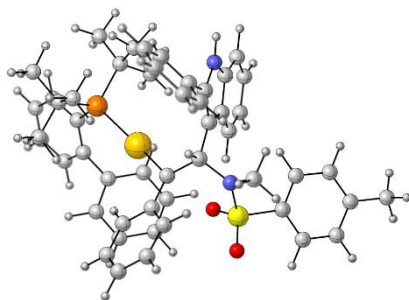

|   |             |             |             |
|---|-------------|-------------|-------------|
| C | 2.04436300  | -3.78065100 | -1.50179200 |
| C | 0.77967300  | -3.21752900 | -1.33661800 |
| C | 0.49869900  | -1.86391100 | -1.63828100 |
| C | 1.55364200  | -1.04197500 | -2.07109200 |
| C | 2.81569400  | -1.59323800 | -2.22308600 |
| C | 3.05799500  | -2.95082600 | -1.95277900 |
| H | 2.22764200  | -4.82958400 | -1.27798000 |
| H | 1.37378100  | 0.00800600  | -2.28984800 |
| H | 3.63467800  | -0.96421500 | -2.56505300 |
| H | 4.05748000  | -3.35494300 | -2.09295800 |
| C | -0.90151000 | -1.65590800 | -1.36345800 |
| C | -1.39963900 | -2.85436600 | -0.88444100 |
| C | -2.70550400 | -3.20300800 | -0.31110800 |
| C | -2.75257700 | -3.83164800 | 0.94133600  |
| C | -3.90965600 | -2.93278200 | -0.97131600 |
| C | -3.96969800 | -4.16278800 | 1.52264400  |
| H | -1.82143100 | -4.04151500 | 1.46752400  |
| C | -5.12705800 | -3.26006300 | -0.38472700 |
| H | -3.88914000 | -2.49978500 | -1.96893700 |
| C | -5.16107600 | -3.87290300 | 0.86336100  |
| H | -3.98927000 | -4.64669900 | 2.49610700  |
| H | -6.05335000 | -3.05113600 | -0.91409300 |
| H | -6.11353400 | -4.13247400 | 1.31798100  |
| N | -0.38087500 | -3.78398700 | -0.86119800 |
| H | -2.71466300 | -0.66529100 | -1.08138500 |
| H | -0.51819700 | -4.76198000 | -0.65220900 |
| C | -2.54612200 | 4.00535600  | 0.73272800  |
| C | -1.77808200 | 2.86881900  | 0.55051700  |
| C | -2.18127500 | 1.84277800  | -0.33561200 |
| C | -3.41493500 | 2.00411300  | -1.01312700 |
| C | -4.19636600 | 3.12254300  | -0.80377000 |
| C | -3.75931300 | 4.12935600  | 0.06037700  |
| H | -2.20779200 | 4.78862800  | 1.40608300  |
| H | -0.83072700 | 2.75920500  | 1.07652900  |
| H | -3.76289300 | 1.24209100  | -1.70425800 |
| H | -5.14531800 | 3.22576000  | -1.32204400 |
| H | -4.37477900 | 5.01311700  | 0.21116900  |
| C | -1.32628500 | 0.69601900  | -0.47775400 |
| C | -1.70492600 | -0.39383600 | -1.45799600 |
| N | -1.92195200 | 0.06239500  | -2.84087500 |
| S | -1.13665900 | 1.38841000  | -3.46317700 |

|    |             |             |             |
|----|-------------|-------------|-------------|
| O  | -2.08664400 | 2.42764700  | -3.83218800 |
| O  | -0.10597300 | 1.68696500  | -2.45864800 |
| C  | -0.40333200 | 0.79219500  | -4.96468400 |
| C  | -0.32716300 | 1.67742200  | -6.03778600 |
| C  | 0.12749500  | -0.49274700 | -5.04761200 |
| C  | 0.30321300  | 1.26509500  | -7.20310200 |
| H  | -0.76462700 | 2.66882200  | -5.95502000 |
| C  | 0.74986600  | -0.88563500 | -6.22349100 |
| H  | 0.04625500  | -1.17989300 | -4.20754000 |
| C  | 0.84948700  | -0.01669900 | -7.31476400 |
| H  | 0.37082800  | 1.94898900  | -8.04725000 |
| H  | 1.16685400  | -1.88827000 | -6.29978100 |
| C  | 1.49828000  | -0.46000100 | -8.58895700 |
| H  | 0.75277700  | -0.86566800 | -9.28434500 |
| H  | 1.99402600  | 0.37272300  | -9.09792800 |
| H  | 2.23965900  | -1.24547300 | -8.41240700 |
| C  | -2.94395900 | -0.58205400 | -3.64357700 |
| H  | -2.96901100 | -0.13885400 | -4.64312800 |
| H  | -2.72249300 | -1.65290000 | -3.75471100 |
| H  | -3.94397500 | -0.45975500 | -3.20115700 |
| C  | 2.61763000  | 1.82495200  | 0.65200700  |
| C  | 2.36265400  | 2.43074300  | 1.88999500  |
| C  | 1.72464200  | 3.67557200  | 1.90941100  |
| C  | 1.34192600  | 4.29719000  | 0.72391700  |
| C  | 1.59146500  | 3.68373800  | -0.49983700 |
| C  | 2.23251600  | 2.44947200  | -0.53208000 |
| H  | 3.15513300  | 0.87769600  | 0.61498100  |
| H  | 1.53835400  | 4.15853100  | 2.86818500  |
| H  | 0.84942100  | 5.26699500  | 0.75710200  |
| H  | 1.28267000  | 4.15702100  | -1.42795300 |
| H  | 2.43137800  | 1.96772200  | -1.48651300 |
| C  | 2.86821400  | 1.85807300  | 3.16271400  |
| C  | 2.50085800  | 0.61182100  | 3.71693900  |
| C  | 3.79273400  | 2.65528100  | 3.85289900  |
| C  | 3.09614000  | 0.22318400  | 4.92901200  |
| C  | 4.36612300  | 2.25216700  | 5.04853200  |
| H  | 4.07323200  | 3.61041000  | 3.41325000  |
| C  | 4.01871400  | 1.02114000  | 5.58950100  |
| H  | 2.82955100  | -0.72598100 | 5.38069400  |
| H  | 5.08442200  | 2.89468100  | 5.55122700  |
| H  | 4.45703400  | 0.68121000  | 6.52409800  |
| P  | 1.17387300  | -0.46231200 | 3.02106100  |
| Au | 0.07121500  | 0.26091200  | 0.99369500  |
| C  | 1.96356500  | -2.15655300 | 2.71065300  |
| C  | 2.92533900  | -1.93702100 | 1.53911600  |
| C  | 2.75379600  | -2.77665200 | 3.86240100  |
| C  | 0.86109300  | -3.12846700 | 2.28800700  |
| H  | 2.41072500  | -1.59711300 | 0.63051500  |
| H  | 3.71222000  | -1.21439200 | 1.79301200  |
| H  | 3.41884800  | -2.88854500 | 1.29915000  |

|   |             |             |            |
|---|-------------|-------------|------------|
| H | 2.16613200  | -2.89638100 | 4.77906700 |
| H | 3.07592000  | -3.77979200 | 3.55182300 |
| H | 3.66022900  | -2.20898600 | 4.09415000 |
| H | 1.32729300  | -4.03418200 | 1.87384400 |
| H | 0.24325300  | -3.43957600 | 3.14010000 |
| H | 0.20858000  | -2.70731900 | 1.51093600 |
| C | -0.20276600 | -0.46168600 | 4.33824400 |
| C | -1.48125200 | -1.05738000 | 3.73836900 |
| C | 0.10937500  | -1.20946700 | 5.63260900 |
| C | -0.46088200 | 1.01590300  | 4.65212200 |
| H | -1.80606600 | -0.52484900 | 2.83556000 |
| H | -1.37759500 | -2.11816100 | 3.48557900 |
| H | -2.28484600 | -0.97500900 | 4.48259100 |
| H | 0.97407900  | -0.80183500 | 6.16455300 |
| H | -0.75186200 | -1.11037800 | 6.30704500 |
| H | 0.26404400  | -2.28234300 | 5.46845700 |
| H | -1.33373000 | 1.09035300  | 5.31424100 |
| H | 0.38761300  | 1.48833100  | 5.16032300 |
| H | -0.68441300 | 1.59371800  | 3.74375600 |

**TS6:**

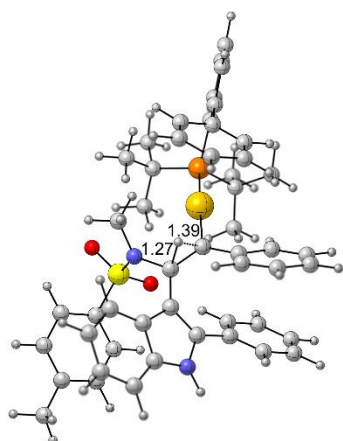

|   |             |             |             |
|---|-------------|-------------|-------------|
| C | -2.11173200 | -4.73911800 | -4.25654000 |
| C | -1.73950500 | -4.04144400 | -3.11107100 |
| C | -1.45801100 | -2.66031400 | -3.11314600 |
| C | -1.57855600 | -1.95050900 | -4.31357200 |
| C | -1.95239900 | -2.63396100 | -5.45918300 |
| C | -2.21368100 | -4.01304100 | -5.43337000 |
| H | -2.32263900 | -5.80554100 | -4.22777800 |
| H | -1.36118000 | -0.88476600 | -4.35482800 |
| H | -2.04365900 | -2.09441600 | -6.39858300 |
| H | -2.50964100 | -4.51846500 | -6.34928000 |
| C | -1.10904600 | -2.30609400 | -1.75800700 |
| C | -1.18084700 | -3.46887200 | -0.99401800 |
| C | -0.90961000 | -3.73922200 | 0.41949100  |
| C | 0.23938100  | -3.24356700 | 1.04691700  |
| C | -1.80536300 | -4.53060800 | 1.14901200  |
| C | 0.48154400  | -3.54185100 | 2.38294000  |
| H | 0.94954500  | -2.63861000 | 0.48506800  |

|   |             |             |             |
|---|-------------|-------------|-------------|
| C | -1.55970600 | -4.81804800 | 2.48576600  |
| H | -2.71740300 | -4.88902700 | 0.67308900  |
| C | -0.41380300 | -4.32660700 | 3.10469500  |
| H | 1.38628400  | -3.16882100 | 2.85824700  |
| H | -2.26568100 | -5.42607700 | 3.04586200  |
| H | -0.21672000 | -4.56017700 | 4.14809200  |
| N | -1.56705800 | -4.49164300 | -1.81423600 |
| H | -1.70978000 | -0.11056600 | -1.23511900 |
| H | -1.59107700 | -5.45786100 | -1.51982500 |
| C | -3.21589100 | -1.48176200 | 2.90661500  |
| C | -2.15781400 | -1.00804400 | 2.14071500  |
| C | -2.25539500 | -0.94509100 | 0.74507700  |
| C | -3.46677100 | -1.31748000 | 0.14122800  |
| C | -4.53714500 | -1.74789000 | 0.91135900  |
| C | -4.41250000 | -1.84321700 | 2.29635900  |
| H | -3.11054100 | -1.54721900 | 3.98663600  |
| H | -1.23179800 | -0.69486300 | 2.62245900  |
| H | -3.58260700 | -1.25016500 | -0.94101700 |
| H | -5.47582700 | -2.00837900 | 0.42873900  |
| H | -5.25156800 | -2.18489500 | 2.89698300  |
| C | -1.10775500 | -0.41531900 | -0.01835400 |
| C | -0.76924500 | -0.96954600 | -1.28792300 |
| N | 0.14536400  | -0.25018800 | -2.14395300 |
| S | 1.77541900  | -0.72902300 | -2.12230800 |
| O | 2.51087100  | 0.42714200  | -2.61095800 |
| O | 2.05001600  | -1.29224100 | -0.80488600 |
| C | 1.85959200  | -2.03041300 | -3.31216100 |
| C | 1.81785900  | -1.69870000 | -4.66396800 |
| C | 1.86861800  | -3.35447800 | -2.88685300 |
| C | 1.76001300  | -2.71886800 | -5.60035700 |
| H | 1.83655900  | -0.65554000 | -4.97327300 |
| C | 1.80665000  | -4.36039700 | -3.84091300 |
| H | 1.92164400  | -3.58557300 | -1.82557100 |
| C | 1.73187100  | -4.06007700 | -5.20387700 |
| H | 1.72551800  | -2.47625500 | -6.66096200 |
| H | 1.81151900  | -5.40252800 | -3.52510200 |
| C | 1.58548000  | -5.14989900 | -6.21848100 |
| H | 2.03926500  | -4.87689000 | -7.17636700 |
| H | 2.03822200  | -6.08629500 | -5.87761200 |
| H | 0.52132200  | -5.34810700 | -6.40569100 |
| C | -0.18649000 | 1.08369600  | -2.64305400 |
| H | 0.49424700  | 1.33918100  | -3.45766900 |
| H | -1.21045300 | 1.06178500  | -3.03967600 |
| H | -0.12390200 | 1.86665100  | -1.87360000 |
| C | -1.56081400 | 4.07466000  | -0.10380300 |
| C | -1.36485500 | 3.81238800  | 1.25508800  |
| C | -2.22827400 | 2.91980900  | 1.90221500  |
| C | -3.25663900 | 2.29495300  | 1.20273000  |
| C | -3.43653800 | 2.55538600  | -0.15340700 |
| C | -2.58623700 | 3.44481700  | -0.80509000 |

|    |             |             |             |
|----|-------------|-------------|-------------|
| H  | -0.91323100 | 4.79295200  | -0.60565500 |
| H  | -2.09671700 | 2.73046700  | 2.96761600  |
| H  | -3.92057400 | 1.60469000  | 1.71981000  |
| H  | -4.25120500 | 2.07832400  | -0.69482200 |
| H  | -2.73452200 | 3.66983800  | -1.85943700 |
| C  | -0.36480000 | 4.59863300  | 2.03306800  |
| C  | 0.92469400  | 4.16880700  | 2.41360000  |
| C  | -0.79065100 | 5.87804800  | 2.41316700  |
| C  | 1.71651600  | 5.03999400  | 3.18007600  |
| C  | 0.00838400  | 6.72276400  | 3.16860000  |
| H  | -1.78457200 | 6.19973800  | 2.10748700  |
| C  | 1.27103100  | 6.29696800  | 3.56150900  |
| H  | 2.71478300  | 4.73702900  | 3.48043000  |
| H  | -0.35536500 | 7.70728100  | 3.45121400  |
| H  | 1.91279100  | 6.94062000  | 4.15731300  |
| P  | 1.62782300  | 2.54060000  | 1.91805300  |
| Au | 0.08390500  | 1.09749600  | 0.81753000  |
| C  | 3.07218200  | 2.92455300  | 0.75716900  |
| C  | 2.43020300  | 3.43104100  | -0.53794000 |
| C  | 4.04463100  | 3.99041400  | 1.25958100  |
| C  | 3.83432700  | 1.63117700  | 0.46588400  |
| H  | 1.84266100  | 2.64892500  | -1.03380600 |
| H  | 1.79208500  | 4.30825300  | -0.36557700 |
| H  | 3.22553900  | 3.72868100  | -1.23402900 |
| H  | 4.51171900  | 3.73319100  | 2.21640900  |
| H  | 4.85256200  | 4.08810300  | 0.52238700  |
| H  | 3.57005800  | 4.97300000  | 1.35239700  |
| H  | 4.52400400  | 1.81257600  | -0.36915800 |
| H  | 4.43820400  | 1.30706000  | 1.32219200  |
| H  | 3.17630200  | 0.80720900  | 0.16269400  |
| C  | 2.14616700  | 1.63834000  | 3.50799200  |
| C  | 2.32094700  | 0.14853800  | 3.18429000  |
| C  | 3.43118400  | 2.13819300  | 4.16625600  |
| C  | 0.97704100  | 1.78579900  | 4.48499300  |
| H  | 1.39654900  | -0.29960200 | 2.79662000  |
| H  | 3.11273100  | -0.04086300 | 2.45196700  |
| H  | 2.58923900  | -0.37939200 | 4.10989400  |
| H  | 3.37292600  | 3.18271700  | 4.48766000  |
| H  | 3.61355100  | 1.54109300  | 5.06989500  |
| H  | 4.30689300  | 2.01548400  | 3.51914600  |
| H  | 1.17439800  | 1.16865700  | 5.37167000  |
| H  | 0.83929000  | 2.82017600  | 4.81926400  |
| H  | 0.03187300  | 1.43906700  | 4.04369800  |

PD:

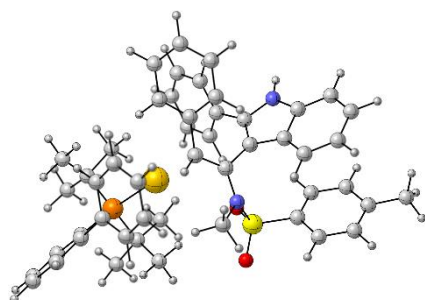

|   |             |             |             |
|---|-------------|-------------|-------------|
| C | -1.70618900 | -5.21125700 | -3.18907900 |
| C | -1.25773800 | -4.24915600 | -2.28612100 |
| C | -1.18633400 | -2.87801300 | -2.60756900 |
| C | -1.64032600 | -2.45301300 | -3.86324000 |
| C | -2.08745600 | -3.40249900 | -4.76603900 |
| C | -2.11373000 | -4.76858900 | -4.43656700 |
| H | -1.74537700 | -6.26419600 | -2.92018500 |
| H | -1.61748300 | -1.39846700 | -4.13478500 |
| H | -2.42605000 | -3.08682700 | -5.75020400 |
| H | -2.47441100 | -5.48801200 | -5.16752700 |
| C | -0.67293100 | -2.20002800 | -1.43576500 |
| C | -0.47045800 | -3.16209000 | -0.46496000 |
| C | 0.07442600  | -3.13384300 | 0.89931300  |
| C | 1.41565400  | -2.80399100 | 1.11851500  |
| C | -0.71104800 | -3.59471800 | 1.96154000  |
| C | 1.96830400  | -2.96745800 | 2.38407300  |
| H | 2.02039500  | -2.45486400 | 0.28327500  |
| C | -0.15732800 | -3.73216900 | 3.22950300  |
| H | -1.75880400 | -3.83676100 | 1.78312900  |
| C | 1.18691500  | -3.43439100 | 3.43756200  |
| H | 3.02114900  | -2.74163000 | 2.54410400  |
| H | -0.77147900 | -4.09076800 | 4.05191600  |
| H | 1.62666300  | -3.56650200 | 4.42373200  |
| N | -0.81901000 | -4.38305100 | -0.98631600 |
| H | -1.98668200 | 0.88269200  | -0.69561400 |
| H | -0.66943400 | -5.25410500 | -0.49730200 |
| C | -3.81864400 | -1.58860200 | 2.34813400  |
| C | -2.82326900 | -0.86891200 | 1.69293700  |
| C | -2.68558200 | -0.92751100 | 0.30304000  |
| C | -3.58591200 | -1.72350700 | -0.41653400 |
| C | -4.57264700 | -2.45300400 | 0.23520200  |
| C | -4.69312200 | -2.38844800 | 1.62139500  |
| H | -3.90328400 | -1.52838500 | 3.43077800  |
| H | -2.13011100 | -0.25792000 | 2.27493100  |
| H | -3.50601500 | -1.77670000 | -1.50181200 |
| H | -5.25737600 | -3.06756500 | -0.34431200 |
| H | -5.46968000 | -2.95416700 | 2.13024200  |
| C | -1.65005500 | -0.12837000 | -0.42626900 |
| C | -0.76954100 | -0.74624400 | -1.33359300 |
| N | -0.13664500 | -0.03065300 | -2.32793800 |

|    |             |             |             |
|----|-------------|-------------|-------------|
| S  | 1.55303200  | -0.37783600 | -2.68548700 |
| O  | 2.04342500  | 0.87934200  | -3.22302200 |
| O  | 2.12653500  | -0.94500700 | -1.47589900 |
| C  | 1.53467200  | -1.58268800 | -3.96739700 |
| C  | 1.27850800  | -1.15652600 | -5.26820000 |
| C  | 1.74166300  | -2.92496600 | -3.66167700 |
| C  | 1.20837000  | -2.10565200 | -6.27700800 |
| H  | 1.15346900  | -0.09803500 | -5.48549400 |
| C  | 1.67018700  | -3.85498200 | -4.68625700 |
| H  | 1.94781500  | -3.22624900 | -2.63694500 |
| C  | 1.38577500  | -3.46447700 | -5.99921500 |
| H  | 1.01205200  | -1.79091700 | -7.30004500 |
| H  | 1.82349300  | -4.91020600 | -4.46676700 |
| C  | 1.24509200  | -4.49340800 | -7.07578000 |
| H  | 1.33371600  | -4.05489000 | -8.07405400 |
| H  | 1.99685200  | -5.28361100 | -6.97851500 |
| H  | 0.26069900  | -4.97541600 | -7.01070000 |
| C  | -0.58154800 | 1.31733500  | -2.67262600 |
| H  | -0.10553200 | 1.62496700  | -3.60408100 |
| H  | -1.66700400 | 1.29266800  | -2.81362200 |
| H  | -0.33264500 | 2.05448900  | -1.89461600 |
| C  | -1.39920200 | 4.13655100  | -0.30946600 |
| C  | -1.17910500 | 3.87426600  | 1.04612200  |
| C  | -2.13919300 | 3.13960900  | 1.75384900  |
| C  | -3.28740500 | 2.67476100  | 1.12032600  |
| C  | -3.49168400 | 2.93349900  | -0.23308800 |
| C  | -2.54493200 | 3.66597600  | -0.94538900 |
| H  | -0.66889200 | 4.72957100  | -0.85969700 |
| H  | -1.99946600 | 2.97096500  | 2.82072800  |
| H  | -4.02790100 | 2.11417600  | 1.68618300  |
| H  | -4.39570400 | 2.58084600  | -0.72425700 |
| H  | -2.70732000 | 3.88999800  | -1.99792300 |
| C  | -0.04720400 | 4.53353100  | 1.75038100  |
| C  | 1.04756500  | 3.89211600  | 2.36971800  |
| C  | -0.13778100 | 5.93078700  | 1.82215700  |
| C  | 1.96683100  | 4.68515500  | 3.07741000  |
| C  | 0.79028800  | 6.69503800  | 2.51211900  |
| H  | -0.98414800 | 6.41442800  | 1.33822000  |
| C  | 1.84477600  | 6.06445200  | 3.15921100  |
| H  | 2.81434000  | 4.21945400  | 3.56889400  |
| H  | 0.68198800  | 7.77569600  | 2.55371600  |
| H  | 2.57680900  | 6.63975400  | 3.71968500  |
| P  | 1.40455900  | 2.08794700  | 2.24890600  |
| Au | -0.11315100 | 0.83617000  | 0.90913600  |
| C  | 3.07648200  | 1.94774700  | 1.36114200  |
| C  | 2.79920300  | 2.39934300  | -0.07725900 |
| C  | 4.21983500  | 2.79713000  | 1.91536400  |
| C  | 3.49993600  | 0.47778600  | 1.35728900  |
| H  | 2.10433000  | 1.72676300  | -0.59293800 |
| H  | 2.39872200  | 3.42141400  | -0.12091700 |



|   |             |             |             |
|---|-------------|-------------|-------------|
| H | 3.73895000  | 2.38414200  | -0.64499300 |
| H | 4.43525300  | 2.60305100  | 2.97169700  |
| H | 5.12757700  | 2.54739800  | 1.35038300  |
| H | 4.04361600  | 3.86877800  | 1.78047200  |
| H | 4.32872400  | 0.35487400  | 0.64741000  |
| H | 3.85904200  | 0.15254700  | 2.34192100  |
| H | 2.69424500  | -0.19120300 | 1.02844200  |
| C | 1.37425900  | 1.41731100  | 4.02461300  |
| C | 1.30787700  | -0.10792700 | 3.96495300  |
| C | 2.56624600  | 1.81781300  | 4.89238700  |
| C | 0.08178500  | 1.93061900  | 4.66248900  |
| H | 0.45067900  | -0.46988800 | 3.38042600  |
| H | 2.21101300  | -0.55140000 | 3.53467000  |
| H | 1.20295600  | -0.49894200 | 4.98658100  |
| H | 2.63603600  | 2.89813800  | 5.05253600  |
| H | 2.44159100  | 1.35944000  | 5.88254400  |
| H | 3.51794800  | 1.45389300  | 4.48895200  |
| H | -0.00099300 | 1.51273800  | 5.67441900  |
| H | 0.05685200  | 3.02322300  | 4.74805900  |
| H | -0.80274000 | 1.60108600  | 4.10081800  |

**TS6-b:**

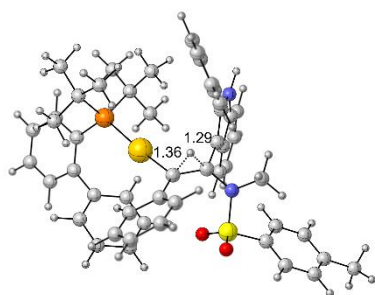

|   |             |             |             |
|---|-------------|-------------|-------------|
| C | 2.11535300  | -3.70914600 | -1.51088900 |
| C | 0.86124100  | -3.11802600 | -1.36147500 |
| C | 0.62188300  | -1.76974000 | -1.70450100 |
| C | 1.68658900  | -0.96882500 | -2.14245400 |
| C | 2.93745700  | -1.54861600 | -2.27810600 |
| C | 3.14455400  | -2.90742700 | -1.97912400 |
| H | 2.28335800  | -4.75352700 | -1.25731300 |
| H | 1.52293700  | 0.08824700  | -2.35441800 |
| H | 3.77577800  | -0.94585700 | -2.61890000 |
| H | 4.13629100  | -3.33430500 | -2.10438400 |
| C | -0.75608400 | -1.50528800 | -1.40988600 |
| C | -1.29941500 | -2.65957400 | -0.87401900 |
| C | -2.59820400 | -2.90826700 | -0.24362600 |
| C | -2.67135600 | -3.74066500 | 0.88342400  |
| C | -3.77888500 | -2.30623700 | -0.70088100 |
| C | -3.87986100 | -3.95446300 | 1.53313200  |
| H | -1.76549400 | -4.20235200 | 1.27372700  |
| C | -4.98485100 | -2.51299500 | -0.04180600 |
| H | -3.76900300 | -1.70354900 | -1.60604800 |
| C | -5.04053000 | -3.33613500 | 1.07787800  |

|   |             |             |             |
|---|-------------|-------------|-------------|
| H | -3.91368500 | -4.60268400 | 2.40526800  |
| H | -5.88926700 | -2.04117900 | -0.41722900 |
| H | -5.98520300 | -3.50122600 | 1.58883900  |
| N | -0.31400300 | -3.62650700 | -0.85339100 |
| H | -2.30139400 | -0.23203600 | -0.67375000 |
| H | -0.48361600 | -4.59614600 | -0.63007700 |
| C | -2.49306600 | 4.24770500  | 0.31060700  |
| C | -1.75539300 | 3.07363800  | 0.25152200  |
| C | -2.20293200 | 1.98363300  | -0.50466600 |
| C | -3.44965700 | 2.07645600  | -1.14147800 |
| C | -4.20592700 | 3.23365200  | -1.04603100 |
| C | -3.72258500 | 4.32919600  | -0.33463400 |
| H | -2.11619100 | 5.09135300  | 0.88411300  |
| H | -0.80952200 | 2.99594300  | 0.78482100  |
| H | -3.83990700 | 1.23459800  | -1.71282000 |
| H | -5.17349400 | 3.28577100  | -1.53780200 |
| H | -4.31340100 | 5.23949800  | -0.27211000 |
| C | -1.38699100 | 0.75495500  | -0.50585000 |
| C | -1.39187400 | -0.17446300 | -1.58771300 |
| N | -1.75828100 | 0.15310200  | -2.90474600 |
| S | -1.21742400 | 1.62172000  | -3.62302500 |
| O | -2.35256400 | 2.49129700  | -3.87308900 |
| O | -0.10376800 | 2.04248600  | -2.78309500 |
| C | -0.62688400 | 1.05735300  | -5.19787800 |
| C | -1.17267000 | 1.63224500  | -6.34219500 |
| C | 0.38677500  | 0.10394000  | -5.27688900 |
| C | -0.68319500 | 1.24696400  | -7.58364800 |
| H | -1.96689000 | 2.36813000  | -6.25080700 |
| C | 0.85432400  | -0.27105700 | -6.52597200 |
| H | 0.79244500  | -0.35462000 | -4.37739200 |
| C | 0.33487900  | 0.29766800  | -7.69551900 |
| H | -1.10135200 | 1.69027800  | -8.48535600 |
| H | 1.63966900  | -1.02108600 | -6.60163600 |
| C | 0.87644000  | -0.09291700 | -9.03481400 |
| H | 1.16680600  | -1.14824400 | -9.05942500 |
| H | 0.14822700  | 0.08296100  | -9.83230200 |
| H | 1.77179200  | 0.49384000  | -9.27532400 |
| C | -2.62163700 | -0.71367100 | -3.69685600 |
| H | -2.42714300 | -0.56592600 | -4.76264200 |
| H | -2.39843200 | -1.75965800 | -3.45977400 |
| H | -3.68414500 | -0.50387100 | -3.51092900 |
| C | 2.43487600  | 1.85250200  | 0.72504200  |
| C | 2.22618700  | 2.49539800  | 1.95177600  |
| C | 1.68287600  | 3.78575200  | 1.94714300  |
| C | 1.35736000  | 4.41842500  | 0.75150000  |
| C | 1.56302000  | 3.76850700  | -0.46162700 |
| C | 2.10152700  | 2.48610500  | -0.46990800 |
| H | 2.89931100  | 0.86718000  | 0.70270500  |
| H | 1.52917900  | 4.29726600  | 2.89650100  |
| H | 0.93981000  | 5.42296800  | 0.76838800  |

|    |             |             |             |
|----|-------------|-------------|-------------|
| H  | 1.29451900  | 4.24845000  | -1.39900000 |
| H  | 2.26888500  | 1.97907900  | -1.41725800 |
| C  | 2.70890400  | 1.92595600  | 3.23581000  |
| C  | 2.30387300  | 0.70690500  | 3.82426300  |
| C  | 3.66860700  | 2.70344600  | 3.90221300  |
| C  | 2.89670600  | 0.32683600  | 5.04082200  |
| C  | 4.23661300  | 2.31070600  | 5.10335600  |
| H  | 3.98214600  | 3.63583800  | 3.43713300  |
| C  | 3.85086000  | 1.10627000  | 5.67699900  |
| H  | 2.60293300  | -0.60299900 | 5.51520900  |
| H  | 4.98126500  | 2.93988600  | 5.58410100  |
| H  | 4.28425700  | 0.77279700  | 6.61617900  |
| P  | 0.94609800  | -0.35801400 | 3.17746500  |
| Au | -0.19222500 | 0.30232600  | 1.17279900  |
| C  | 1.72347900  | -2.05837900 | 2.85508200  |
| C  | 2.65705200  | -1.85573500 | 1.65764900  |
| C  | 2.53718300  | -2.66983700 | 3.99473200  |
| C  | 0.61170800  | -3.02993500 | 2.46041100  |
| H  | 2.11650700  | -1.52944700 | 0.75829700  |
| H  | 3.45021500  | -1.12955200 | 1.87891900  |
| H  | 3.14448400  | -2.81111100 | 1.41958600  |
| H  | 1.96574200  | -2.78587500 | 4.92211800  |
| H  | 2.85786100  | -3.67365700 | 3.68475400  |
| H  | 3.44463000  | -2.09649800 | 4.20795300  |
| H  | 1.06922100  | -3.94336000 | 2.05179500  |
| H  | -0.00262300 | -3.32715100 | 3.31978800  |
| H  | -0.04480500 | -2.61094600 | 1.68570300  |
| C  | -0.39961600 | -0.34395500 | 4.52442900  |
| C  | -1.69724700 | -0.91415400 | 3.93950300  |
| C  | -0.08227400 | -1.10806600 | 5.80804700  |
| C  | -0.62539200 | 1.13676100  | 4.84899400  |
| H  | -2.03938400 | -0.35325100 | 3.06065800  |
| H  | -1.60943600 | -1.96834500 | 3.65388000  |
| H  | -2.48213500 | -0.84506600 | 4.70470900  |
| H  | 0.79510500  | -0.72020700 | 6.33358800  |
| H  | -0.93303500 | -1.00039800 | 6.49427500  |
| H  | 0.05205400  | -2.18205700 | 5.63271900  |
| H  | -1.49804200 | 1.22610100  | 5.50943400  |
| H  | 0.23264100  | 1.58482600  | 5.36274400  |
| H  | -0.83296300 | 1.72818200  | 3.94514100  |

PD-b:

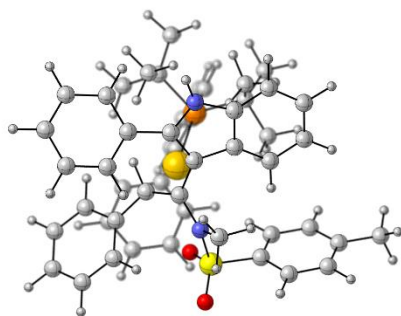

|   |             |             |             |
|---|-------------|-------------|-------------|
| C | 0.13258300  | -5.23920800 | -1.28039900 |
| C | -0.74609200 | -4.18260600 | -1.05401900 |
| C | -0.56886800 | -2.90803800 | -1.63206400 |
| C | 0.55141900  | -2.68435100 | -2.44314500 |
| C | 1.43213600  | -3.72954100 | -2.67180900 |
| C | 1.22214100  | -4.99619300 | -2.10326000 |
| H | -0.02778900 | -6.21529800 | -0.82877400 |
| H | 0.73722500  | -1.70744000 | -2.88430700 |
| H | 2.29974600  | -3.56434100 | -3.30761000 |
| H | 1.92517600  | -5.79934600 | -2.30825700 |
| C | -1.64307400 | -2.07493700 | -1.14457800 |
| C | -2.43474700 | -2.87097800 | -0.32068300 |
| C | -3.68417400 | -2.58533800 | 0.38517500  |
| C | -3.90802000 | -3.11926200 | 1.66038400  |
| C | -4.67348900 | -1.78365900 | -0.19954100 |
| C | -5.09201100 | -2.85094900 | 2.33745700  |
| H | -3.13659100 | -3.72476300 | 2.13528400  |
| C | -5.84871900 | -1.50922700 | 0.48387900  |
| H | -4.51798500 | -1.37525100 | -1.19753100 |
| C | -6.06208000 | -2.04340100 | 1.75289500  |
| H | -5.25347600 | -3.26783400 | 3.32828400  |
| H | -6.60624800 | -0.88265500 | 0.02045200  |
| H | -6.98595800 | -1.83074400 | 2.28430900  |
| N | -1.87479900 | -4.12153500 | -0.25789200 |
| H | -2.32612700 | -0.40319700 | 0.58153500  |
| H | -2.34264900 | -4.91802200 | 0.15117200  |
| C | -4.01042100 | 3.13068900  | 1.09419200  |
| C | -3.18043900 | 2.02685500  | 0.94994500  |
| C | -2.98115300 | 1.42688200  | -0.30073800 |
| C | -3.65979500 | 1.95651400  | -1.40483600 |
| C | -4.48838400 | 3.06155900  | -1.26074300 |
| C | -4.66326800 | 3.65867900  | -0.01482600 |
| H | -4.15067200 | 3.57647900  | 2.07662800  |
| H | -2.66972400 | 1.61348000  | 1.82203300  |
| H | -3.55704900 | 1.50253700  | -2.38762500 |
| H | -5.00510500 | 3.45703300  | -2.13173600 |
| H | -5.31300000 | 4.52377200  | 0.09110000  |
| C | -2.17390600 | 0.19033300  | -0.32773200 |
| C | -1.82661300 | -0.64972600 | -1.39107700 |
| N | -1.73275200 | -0.26796900 | -2.73261400 |
| S | -0.99523000 | 1.17969100  | -3.29934700 |

|    |             |             |             |
|----|-------------|-------------|-------------|
| O  | -1.84917900 | 1.66747000  | -4.36618200 |
| O  | -0.68250800 | 1.96613300  | -2.12057000 |
| C  | 0.52833100  | 0.61739400  | -4.00106300 |
| C  | 0.55195200  | 0.08805600  | -5.29046400 |
| C  | 1.68358600  | 0.69159300  | -3.22614300 |
| C  | 1.74785200  | -0.41108400 | -5.78538100 |
| H  | -0.34915200 | 0.08403400  | -5.89879900 |
| C  | 2.87198300  | 0.19502100  | -3.74513800 |
| H  | 1.64161800  | 1.13922300  | -2.23373800 |
| C  | 2.92100400  | -0.37028400 | -5.02302900 |
| H  | 1.77999700  | -0.83142600 | -6.78894600 |
| H  | 3.78381900  | 0.25297100  | -3.15216400 |
| C  | 4.20737500  | -0.88854600 | -5.58609600 |
| H  | 4.93352600  | -1.11290500 | -4.79880400 |
| H  | 4.04904200  | -1.79557500 | -6.17891700 |
| H  | 4.66543500  | -0.14683600 | -6.25204400 |
| C  | -2.13448500 | -1.19870900 | -3.79692200 |
| H  | -1.28839400 | -1.76963900 | -4.19954200 |
| H  | -2.86704600 | -1.89919500 | -3.39188400 |
| H  | -2.61133400 | -0.62309900 | -4.59439400 |
| C  | 1.54908200  | 3.21995400  | 0.33154300  |
| C  | 1.39282900  | 3.10542500  | 1.71642800  |
| C  | 0.26671700  | 3.66884300  | 2.32237100  |
| C  | -0.70270200 | 4.30434400  | 1.55234000  |
| C  | -0.54623000 | 4.40473400  | 0.17411100  |
| C  | 0.59037300  | 3.87787600  | -0.43204600 |
| H  | 2.44937900  | 2.82080900  | -0.13697800 |
| H  | 0.16345400  | 3.61513700  | 3.40601800  |
| H  | -1.58091300 | 4.73069100  | 2.03182700  |
| H  | -1.30927400 | 4.89126100  | -0.42916000 |
| H  | 0.72221200  | 3.96541300  | -1.50632200 |
| C  | 2.47624600  | 2.54049500  | 2.56095100  |
| C  | 2.77821000  | 1.16995000  | 2.70694200  |
| C  | 3.23257200  | 3.47968600  | 3.27369600  |
| C  | 3.83207400  | 0.80915200  | 3.56478900  |
| C  | 4.27435500  | 3.10334000  | 4.10732600  |
| H  | 2.98473400  | 4.53233800  | 3.15191800  |
| C  | 4.57836400  | 1.75560300  | 4.25132700  |
| H  | 4.07527300  | -0.23577000 | 3.71791800  |
| H  | 4.84347200  | 3.85864800  | 4.64315900  |
| H  | 5.38748800  | 1.43571700  | 4.90261200  |
| P  | 1.71603600  | -0.15922100 | 2.00545200  |
| Au | -0.02718000 | 0.41432500  | 0.47877300  |
| C  | 2.82249500  | -1.42397100 | 1.11769100  |
| C  | 3.16973400  | -0.78557700 | -0.22999800 |
| C  | 4.13026200  | -1.80698800 | 1.81043400  |
| C  | 2.00814800  | -2.69381200 | 0.87095200  |
| H  | 2.27779000  | -0.65283900 | -0.85552800 |
| H  | 3.66641600  | 0.18800400  | -0.11024200 |
| H  | 3.85687300  | -1.44971200 | -0.77355100 |

|   |             |             |            |
|---|-------------|-------------|------------|
| H | 3.98406600  | -2.21951200 | 2.81493500 |
| H | 4.61026800  | -2.59125400 | 1.20992100 |
| H | 4.83234800  | -0.96921600 | 1.86633500 |
| H | 2.54874800  | -3.32849300 | 0.15533800 |
| H | 1.87057700  | -3.28003100 | 1.78725400 |
| H | 1.02491300  | -2.48433900 | 0.43004500 |
| C | 0.82151500  | -0.88314800 | 3.52591900 |
| C | -0.36518700 | -1.74826000 | 3.08759500 |
| C | 1.72314000  | -1.70955300 | 4.44121900 |
| C | 0.26864200  | 0.31534000  | 4.30324300 |
| H | -1.09857400 | -1.17487200 | 2.50497900 |
| H | -0.07003800 | -2.62148500 | 2.49708000 |
| H | -0.87655500 | -2.11394700 | 3.98852100 |
| H | 2.55964100  | -1.12881700 | 4.84276000 |
| H | 1.13139500  | -2.05000800 | 5.30146900 |
| H | 2.11681800  | -2.60520200 | 3.94646300 |
| H | -0.34906300 | -0.05699600 | 5.13113100 |
| H | 1.06171200  | 0.93905800  | 4.73159500 |
| H | -0.36883000 | 0.95178800  | 3.67352600 |

## 7.4 Coordinates of Optimized Structures in Figure 4

IM3-c:

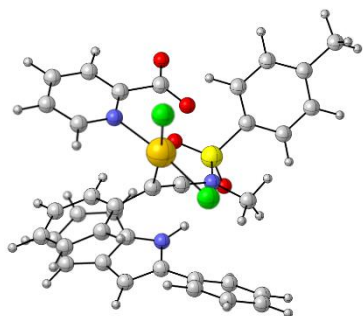

|   |             |             |             |
|---|-------------|-------------|-------------|
| C | -0.52314000 | -4.27691900 | -2.74084900 |
| C | -1.07998900 | -4.07992000 | -1.47706600 |
| C | -2.47993300 | -4.05363400 | -1.25930900 |
| C | -3.33706200 | -4.29017400 | -2.34359100 |
| C | -2.79020300 | -4.50649500 | -3.59639400 |
| C | -1.39679800 | -4.48710300 | -3.79509800 |
| H | 0.55485700  | -4.25877900 | -2.88726700 |
| H | -4.41648500 | -4.28448100 | -2.19970000 |
| H | -3.44436500 | -4.69048000 | -4.44606700 |
| H | -0.99837000 | -4.64745600 | -4.79427800 |
| C | -2.67745800 | -3.74882300 | 0.12091800  |
| C | -1.43505200 | -3.63475900 | 0.69738700  |
| C | -1.07464900 | -3.37962400 | 2.09011300  |
| C | -0.02008800 | -4.07291000 | 2.69953600  |
| C | -1.79319000 | -2.44365200 | 2.84505700  |
| C | 0.29530200  | -3.84540000 | 4.03438700  |
| H | 0.53376200  | -4.81516500 | 2.12611500  |
| C | -1.46923900 | -2.21171000 | 4.17691700  |
| H | -2.59716700 | -1.88446800 | 2.36681500  |
| C | -0.42597300 | -2.91369700 | 4.77692600  |
| H | 1.10437500  | -4.40444800 | 4.49974700  |
| H | -2.02747500 | -1.47101400 | 4.74462500  |
| H | -0.17672400 | -2.73433200 | 5.81998300  |
| N | -0.46693700 | -3.84608500 | -0.26934700 |
| H | -3.62210500 | -3.66152100 | 0.64470000  |
| H | 0.53518300  | -3.77850200 | -0.12055000 |
| C | -4.66366600 | -0.20525300 | -0.45332000 |
| C | -3.47139500 | 0.09765500  | 0.19042400  |
| C | -2.25597100 | -0.20478800 | -0.43584700 |
| C | -2.23858400 | -0.78265900 | -1.71060800 |
| C | -3.43896000 | -1.05078700 | -2.35617900 |
| C | -4.64881100 | -0.77097700 | -1.72771600 |
| H | -5.60994300 | 0.01510500  | 0.03486800  |
| H | -3.46410100 | 0.56915400  | 1.17269000  |
| H | -1.28279000 | -1.00749100 | -2.18412900 |
| H | -3.42274800 | -1.50850800 | -3.34207300 |
| H | -5.58613900 | -0.99223300 | -2.23304200 |
| C | -0.98621700 | 0.19358800  | 0.15586500  |

|    |             |             |             |
|----|-------------|-------------|-------------|
| C  | 0.09693900  | -0.42457600 | 0.43738700  |
| N  | 1.17689600  | -0.94518800 | 0.84654800  |
| S  | 2.33692600  | -1.63072300 | -0.38209500 |
| O  | 2.41162100  | -3.01746800 | 0.07270000  |
| O  | 1.74651700  | -1.28465000 | -1.65339600 |
| C  | 3.86418200  | -0.83843000 | -0.06454600 |
| C  | 4.70390300  | -1.39778900 | 0.90490500  |
| C  | 4.20930800  | 0.29979000  | -0.79133500 |
| C  | 5.91428100  | -0.77897700 | 1.16131800  |
| H  | 4.41837400  | -2.30965500 | 1.42275500  |
| C  | 5.43500800  | 0.88954000  | -0.51105800 |
| H  | 3.55411200  | 0.72842300  | -1.55617900 |
| C  | 6.29193900  | 0.37648800  | 0.46432600  |
| H  | 6.58691600  | -1.19913600 | 1.90681500  |
| H  | 5.72670400  | 1.77746800  | -1.06855000 |
| C  | 7.58763200  | 1.05806400  | 0.77422700  |
| H  | 7.44414600  | 1.82073400  | 1.55009900  |
| H  | 8.33792700  | 0.35243200  | 1.14549100  |
| H  | 7.99416200  | 1.56585700  | -0.10603000 |
| Au | -0.74430700 | 2.24548200  | 0.52933800  |
| Cl | -0.78718000 | 1.77904700  | 2.82576200  |
| Cl | -0.77757500 | 4.58073800  | 0.86068500  |
| O  | 1.56445400  | 1.79564400  | -0.57729600 |
| O  | 2.36531400  | 1.85654900  | -2.68642400 |
| N  | -0.93461500 | 2.56661100  | -1.55419400 |
| C  | 0.10395300  | 2.36563800  | -2.37430700 |
| C  | -0.06913800 | 2.50598400  | -3.74940000 |
| C  | -1.31086100 | 2.85172600  | -4.25535300 |
| C  | -2.36939900 | 3.06956200  | -3.37656400 |
| C  | -2.14328000 | 2.92130100  | -2.02136600 |
| C  | 1.48908700  | 1.97010700  | -1.81810300 |
| H  | 0.80507500  | 2.33116500  | -4.36858400 |
| H  | -1.45792100 | 2.95783600  | -5.32743000 |
| H  | -3.35625300 | 3.35349700  | -3.72778400 |
| H  | -2.92377000 | 3.08533300  | -1.28203900 |
| C  | 1.52520200  | -1.08596200 | 2.27097100  |
| H  | 2.30917400  | -0.35780500 | 2.50180400  |
| H  | 0.63211500  | -0.86435700 | 2.86180100  |
| H  | 1.85727400  | -2.10947000 | 2.46045200  |



**TS4-c:**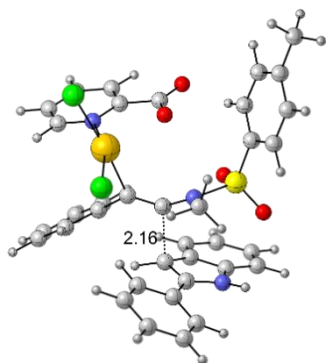

|   |            |             |              |
|---|------------|-------------|--------------|
| C | 7.08760700 | -5.96079300 | -8.36733600  |
| C | 6.40018500 | -5.18587700 | -7.44361100  |
| C | 5.46940000 | -4.19999800 | -7.80389100  |
| C | 5.16000300 | -4.02829400 | -9.15396600  |
| C | 5.81787000 | -4.81233800 | -10.08902400 |
| C | 6.78205000 | -5.75443800 | -9.70372600  |
| H | 7.83634200 | -6.68416700 | -8.05530900  |
| H | 4.41239900 | -3.30211700 | -9.46283000  |
| H | 5.58862000 | -4.69071300 | -11.14464600 |
| H | 7.29463200 | -6.33649800 | -10.46506700 |
| C | 5.04744200 | -3.55151300 | -6.57295200  |
| C | 5.60800800 | -4.30966200 | -5.51528500  |
| C | 5.39618400 | -4.18422600 | -4.08449200  |
| C | 5.78359800 | -5.20675100 | -3.20573400  |
| C | 4.80219800 | -3.02815500 | -3.55965500  |
| C | 5.59722600 | -5.06564600 | -1.83857300  |
| H | 6.20317400 | -6.13316900 | -3.59437300  |
| C | 4.62409100 | -2.88874600 | -2.19137400  |
| H | 4.52701800 | -2.21067200 | -4.22264600  |
| C | 5.02188000 | -3.90483900 | -1.32692000  |
| H | 5.89716000 | -5.86734700 | -1.16844100  |
| H | 4.18906700 | -1.97166800 | -1.80212500  |
| H | 4.88411200 | -3.79301100 | -0.25444400  |
| N | 6.45547100 | -5.21502000 | -6.05060300  |
| H | 4.10132100 | -3.03528100 | -6.45822000  |
| H | 7.19219000 | -5.68185500 | -5.53788800  |
| C | 1.75884000 | -0.30243900 | -6.69506100  |
| C | 3.04201700 | -0.41930800 | -6.17156100  |
| C | 4.11221400 | -0.74255900 | -7.01467200  |
| C | 3.88582800 | -0.90369100 | -8.38797600  |
| C | 2.60184500 | -0.77758100 | -8.90336100  |
| C | 1.53502300 | -0.48184600 | -8.05772400  |
| H | 0.92995900 | -0.06030100 | -6.03421600  |
| H | 3.23128000 | -0.24331500 | -5.11300000  |
| H | 4.73782000 | -1.11011500 | -9.03611600  |
| H | 2.43543700 | -0.90339800 | -9.97104000  |
| H | 0.53046400 | -0.38296700 | -8.46177900  |
| C | 5.48932000 | -0.80589100 | -6.52644900  |
| C | 6.32101200 | -1.81276400 | -6.38320300  |

|    |             |             |              |
|----|-------------|-------------|--------------|
| N  | 7.55937700  | -2.10252200 | -6.01500300  |
| S  | 8.74480700  | -2.73082500 | -7.17818900  |
| O  | 9.04965100  | -4.05693800 | -6.64398100  |
| O  | 8.13547400  | -2.54747300 | -8.47743300  |
| C  | 10.20216000 | -1.76122500 | -6.98119300  |
| C  | 11.08037400 | -2.07593700 | -5.94070400  |
| C  | 10.49168600 | -0.77142200 | -7.91422500  |
| C  | 12.24852800 | -1.34362200 | -5.81111100  |
| H  | 10.86107000 | -2.89815000 | -5.26458500  |
| C  | 11.67613800 | -0.06145100 | -7.76586000  |
| H  | 9.81628600  | -0.53974500 | -8.73664000  |
| C  | 12.55594200 | -0.31876300 | -6.71417200  |
| H  | 12.94290700 | -1.57350700 | -5.00460700  |
| H  | 11.91006000 | 0.72001900  | -8.48680600  |
| C  | 13.80158300 | 0.49481500  | -6.54518000  |
| H  | 14.58900600 | -0.07017300 | -6.03510000  |
| H  | 14.19088500 | 0.83713000  | -7.50957700  |
| H  | 13.59860600 | 1.38940500  | -5.94289500  |
| Au | 6.10428900  | 1.12460200  | -6.00039200  |
| Cl | 5.91026000  | 0.47914900  | -3.73311900  |
| Cl | 6.56115100  | 3.38662000  | -5.41985500  |
| O  | 8.07027800  | 0.63710500  | -7.51580000  |
| O  | 8.57895300  | 0.79715800  | -9.71205300  |
| N  | 5.65237000  | 1.83234700  | -8.00032100  |
| C  | 6.51268000  | 1.63410000  | -8.99910600  |
| C  | 6.18956700  | 2.04103000  | -10.29174700 |
| C  | 4.97421600  | 2.66337100  | -10.52479700 |
| C  | 4.10300800  | 2.88108400  | -9.45926000  |
| C  | 4.47927300  | 2.45057300  | -8.19976300  |
| C  | 7.86200000  | 0.95220700  | -8.71459100  |
| H  | 6.92585300  | 1.84766000  | -11.06563800 |
| H  | 4.70473900  | 2.98724200  | -11.52747300 |
| H  | 3.14769000  | 3.37850000  | -9.59489400  |
| H  | 3.84723500  | 2.59325400  | -7.32560600  |
| C  | 7.98193300  | -2.15952100 | -4.61015200  |
| H  | 8.86281200  | -1.51857300 | -4.48872500  |
| H  | 7.18293000  | -1.75325700 | -3.98785200  |
| H  | 8.22285500  | -3.18721500 | -4.31583800  |

**IM4-c:**

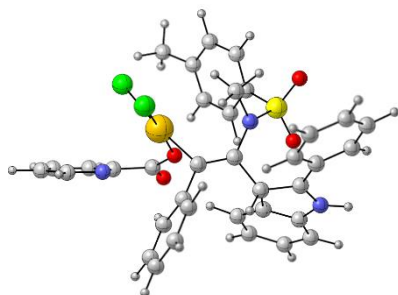

|   |             |             |             |
|---|-------------|-------------|-------------|
| C | -0.18178500 | -5.15220900 | -2.03081200 |
| C | -0.54404100 | -4.38358700 | -0.93944500 |
| C | -0.71165400 | -3.00208800 | -0.98916000 |

|   |             |             |             |
|---|-------------|-------------|-------------|
| C | -0.45322300 | -2.32379100 | -2.16582600 |
| C | -0.06088100 | -3.07140600 | -3.27720200 |
| C | 0.05281500  | -4.46160600 | -3.21805600 |
| H | -0.05421100 | -6.22958900 | -1.96259200 |
| H | -0.47812200 | -1.23758900 | -2.20264100 |
| H | 0.18409900  | -2.54665200 | -4.19704900 |
| H | 0.35759400  | -5.01403700 | -4.10286000 |
| C | -1.12154800 | -2.52630700 | 0.38061000  |
| C | -0.92861400 | -3.75182900 | 1.20657900  |
| C | -0.98058000 | -3.85317200 | 2.64379000  |
| C | -0.21779600 | -4.82147500 | 3.31289500  |
| C | -1.74981900 | -2.93999400 | 3.37872700  |
| C | -0.24484400 | -4.88681600 | 4.69673700  |
| H | 0.45616800  | -5.46750300 | 2.75252700  |
| C | -1.78373800 | -3.02167300 | 4.76103800  |
| H | -2.32152300 | -2.17423500 | 2.85735500  |
| C | -1.03312000 | -3.99416000 | 5.41906300  |
| H | 0.36709300  | -5.61899500 | 5.21579700  |
| H | -2.38640700 | -2.31885900 | 5.32949500  |
| H | -1.04796700 | -4.04414300 | 6.50485200  |
| N | -0.71284100 | -4.77679900 | 0.40635300  |
| H | -2.22305000 | -2.38068700 | 0.34889200  |
| H | -0.57507700 | -5.72315200 | 0.74271800  |
| C | -4.90186800 | -0.16178300 | 0.37522800  |
| C | -3.58091500 | -0.19820900 | 0.80553100  |
| C | -2.52250200 | -0.01428800 | -0.09977200 |
| C | -2.82850300 | 0.24545000  | -1.44288400 |
| C | -4.14906400 | 0.27721100  | -1.86925100 |
| C | -5.18913000 | 0.06871500  | -0.96641800 |
| H | -5.70823100 | -0.29983900 | 1.09200500  |
| H | -3.34678100 | -0.32716900 | 1.86278700  |
| H | -2.01943500 | 0.44115700  | -2.14137100 |
| H | -4.36856200 | 0.47341400  | -2.91617800 |
| H | -6.22163900 | 0.10063400  | -1.30623100 |
| C | -1.14882600 | -0.07029300 | 0.41076500  |
| C | -0.55150700 | -1.19395700 | 0.85755800  |
| N | 0.53440100  | -1.23491400 | 1.76572100  |
| S | 1.99050800  | -2.03976300 | 1.44273900  |
| O | 2.56121000  | -2.35936700 | 2.74352800  |
| O | 1.64169800  | -3.11867000 | 0.51950400  |
| C | 3.01356600  | -0.86234500 | 0.63242700  |
| C | 3.79602600  | -0.00772400 | 1.41348100  |
| C | 2.92013400  | -0.70685100 | -0.74724700 |
| C | 4.47306100  | 1.02740800  | 0.79168500  |
| H | 3.86761400  | -0.16568000 | 2.48680000  |
| C | 3.61506600  | 0.33282400  | -1.34843100 |
| H | 2.29101000  | -1.36462800 | -1.34270900 |
| C | 4.37071300  | 1.22680000  | -0.58998400 |
| H | 5.07312800  | 1.71394400  | 1.38624000  |
| H | 3.50549000  | 0.48290900  | -2.42151700 |

|    |             |             |             |
|----|-------------|-------------|-------------|
| C  | 4.99897900  | 2.42194500  | -1.23155900 |
| H  | 5.89542500  | 2.75135600  | -0.69541700 |
| H  | 5.26500700  | 2.22994800  | -2.27626500 |
| H  | 4.27758800  | 3.25069100  | -1.21653100 |
| Au | -0.07009900 | 1.66641100  | 0.21361700  |
| Cl | -1.07617800 | 2.57819700  | 2.11795000  |
| Cl | 1.51344900  | 3.48555700  | -0.03178800 |
| O  | 0.56804100  | 0.68301600  | -1.51485200 |
| O  | 1.21457400  | 0.62118300  | -3.62098400 |
| N  | -0.96393700 | 2.93832200  | -2.14970900 |
| C  | 0.04708100  | 2.56771100  | -2.93944000 |
| C  | 0.54407600  | 3.36547500  | -3.96527000 |
| C  | -0.00162700 | 4.63030500  | -4.13580300 |
| C  | -1.03608500 | 5.03465100  | -3.30007700 |
| C  | -1.49192500 | 4.14595100  | -2.33106600 |
| C  | 0.66550200  | 1.21631100  | -2.70022200 |
| H  | 1.34769300  | 2.98476800  | -4.58838400 |
| H  | 0.37728200  | 5.29569100  | -4.90826200 |
| H  | -1.48506800 | 6.01967900  | -3.39349500 |
| H  | -2.30711800 | 4.41971600  | -1.66135700 |
| C  | 0.60781300  | -0.27610900 | 2.87190900  |
| H  | 1.20608300  | 0.61292300  | 2.62713800  |
| H  | -0.40623400 | 0.06374000  | 3.09568900  |
| H  | 1.03476600  | -0.78125000 | 3.74306400  |

**TS5-c:**

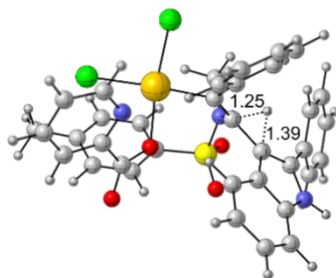

|   |             |             |             |
|---|-------------|-------------|-------------|
| C | -1.21978700 | -5.00615900 | -2.60053900 |
| C | -1.10253500 | -4.32206800 | -1.39651700 |
| C | -1.14543700 | -2.91798900 | -1.31219700 |
| C | -1.25075500 | -2.16591700 | -2.48345900 |
| C | -1.35503300 | -2.83901700 | -3.69088400 |
| C | -1.35662400 | -4.23985800 | -3.74839400 |
| H | -1.18340800 | -6.09211300 | -2.64203200 |
| H | -1.22206200 | -1.07999100 | -2.45040000 |
| H | -1.42851700 | -2.26880300 | -4.61306500 |
| H | -1.44634500 | -4.73482700 | -4.71200600 |
| C | -0.94617500 | -2.59407700 | 0.08103000  |
| C | -0.79721000 | -3.80287900 | 0.78304300  |
| C | -0.51133300 | -4.06386700 | 2.18819300  |
| C | 0.44255300  | -5.03168100 | 2.52451300  |
| C | -1.14011500 | -3.34134900 | 3.20778600  |

|    |             |             |             |
|----|-------------|-------------|-------------|
| C  | 0.76303500  | -5.26519200 | 3.85399700  |
| H  | 0.98384500  | -5.54662600 | 1.73270700  |
| C  | -0.81289200 | -3.57316900 | 4.53584100  |
| H  | -1.90864600 | -2.60724000 | 2.96393000  |
| C  | 0.13941200  | -4.53533000 | 4.86057800  |
| H  | 1.52180000  | -6.00190300 | 4.10396500  |
| H  | -1.30729400 | -3.00633700 | 5.32072900  |
| H  | 0.39910600  | -4.71193400 | 5.90125900  |
| N  | -0.88461000 | -4.81380900 | -0.11788500 |
| H  | -1.62675800 | -1.81527800 | 1.00712900  |
| H  | -0.84150000 | -5.79015400 | 0.13622600  |
| C  | -4.93489000 | -0.47428700 | 0.39279700  |
| C  | -3.57724400 | -0.52682800 | 0.67342800  |
| C  | -2.63056400 | -0.03022400 | -0.24305500 |
| C  | -3.09524400 | 0.58439100  | -1.42025900 |
| C  | -4.45164700 | 0.62111700  | -1.69879900 |
| C  | -5.37513500 | 0.08801400  | -0.80064300 |
| H  | -5.65102000 | -0.84988400 | 1.11927900  |
| H  | -3.24632900 | -0.88635000 | 1.64893200  |
| H  | -2.36842700 | 1.01982800  | -2.10682800 |
| H  | -4.79549000 | 1.08180800  | -2.62189700 |
| H  | -6.43908300 | 0.13625700  | -1.01917700 |
| C  | -1.21535200 | -0.09064900 | 0.06609800  |
| C  | -0.59593000 | -1.21127100 | 0.62499900  |
| N  | 0.47542500  | -1.12171700 | 1.52654800  |
| S  | 2.01173600  | -1.86046500 | 1.28665000  |
| O  | 2.39487300  | -2.33435500 | 2.60921500  |
| O  | 1.86393900  | -2.77873600 | 0.16933500  |
| C  | 3.07947100  | -0.53072100 | 0.84046300  |
| C  | 3.59715100  | 0.28864500  | 1.84557300  |
| C  | 3.34826700  | -0.29371300 | -0.50456400 |
| C  | 4.35767600  | 1.38893600  | 1.48271200  |
| H  | 3.41777900  | 0.05188600  | 2.89153600  |
| C  | 4.11724000  | 0.81076500  | -0.84096200 |
| H  | 2.94165800  | -0.93566500 | -1.27983100 |
| C  | 4.60604700  | 1.67802000  | 0.13686800  |
| H  | 4.75975800  | 2.04464400  | 2.25312300  |
| H  | 4.30314600  | 1.01874200  | -1.89354800 |
| C  | 5.33697100  | 2.92257300  | -0.25406500 |
| H  | 5.98830000  | 3.28440300  | 0.54843800  |
| H  | 5.94291300  | 2.77035600  | -1.15362400 |
| H  | 4.61022200  | 3.71497400  | -0.47754000 |
| Au | -0.05182600 | 1.55084500  | -0.26120100 |
| Cl | -1.20660300 | 2.69223000  | 1.41982400  |
| Cl | 1.45255200  | 3.37455400  | -0.63866800 |
| O  | 0.85964600  | 0.32306800  | -1.65994900 |
| O  | 2.11785500  | 0.15199700  | -3.46807900 |
| N  | -0.68580200 | 2.22001900  | -3.03140400 |
| C  | 0.53737900  | 1.90797300  | -3.46694600 |
| C  | 1.19182000  | 2.62443200  | -4.46439500 |

|   |             |             |             |
|---|-------------|-------------|-------------|
| C | 0.56732200  | 3.74796900  | -4.98672700 |
| C | -0.69391000 | 4.09711100  | -4.51720800 |
| C | -1.28380400 | 3.29096300  | -3.55014400 |
| C | 1.23899000  | 0.72792900  | -2.84665300 |
| H | 2.17342800  | 2.29472600  | -4.79022800 |
| H | 1.05926300  | 4.34889800  | -5.74796400 |
| H | -1.21429300 | 4.97406800  | -4.89182700 |
| H | -2.27998300 | 3.51859100  | -3.16621000 |
| C | 0.37785200  | -0.22656800 | 2.68130400  |
| H | 0.91695200  | 0.71782800  | 2.52830800  |
| H | -0.67668000 | 0.02105000  | 2.83893100  |
| H | 0.76712100  | -0.74077400 | 3.56586000  |

IM5-c:

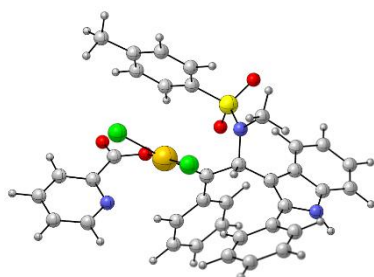

|   |             |             |             |
|---|-------------|-------------|-------------|
| C | -1.88927500 | -6.51998800 | 0.00156900  |
| C | -1.73579000 | -5.21775400 | 0.47084400  |
| C | -0.88326800 | -4.27020600 | -0.14447200 |
| C | -0.15400700 | -4.67243800 | -1.27617900 |
| C | -0.29867000 | -5.96822900 | -1.74317400 |
| C | -1.15531100 | -6.88466200 | -1.11451600 |
| H | -2.55752800 | -7.22091700 | 0.49736300  |
| H | 0.50117600  | -3.98133100 | -1.79721200 |
| H | 0.26556600  | -6.28068400 | -2.61829000 |
| H | -1.24464700 | -7.89415500 | -1.50857100 |
| C | -1.01459200 | -3.04273400 | 0.60555600  |
| C | -1.90699700 | -3.29689400 | 1.63543400  |
| C | -2.36296000 | -2.46496800 | 2.75082900  |
| C | -2.42418300 | -3.01211900 | 4.04082300  |
| C | -2.74463400 | -1.13135900 | 2.56848500  |
| C | -2.84210100 | -2.24116000 | 5.11633900  |
| H | -2.10606600 | -4.04142400 | 4.19998500  |
| C | -3.14994500 | -0.35791700 | 3.64925000  |
| H | -2.74558700 | -0.70175100 | 1.56817900  |
| C | -3.20068700 | -0.90921300 | 4.92435700  |
| H | -2.87377600 | -2.67654300 | 6.11228200  |
| H | -3.42721800 | 0.68117400  | 3.49011200  |
| H | -3.51671300 | -0.30227100 | 5.76911700  |
| N | -2.32807900 | -4.60489100 | 1.55128000  |
| H | -0.35855500 | -1.30844100 | 1.55490600  |
| H | -3.06605100 | -4.99511300 | 2.11736100  |
| C | -3.35879800 | -1.57828000 | -2.58756700 |
| C | -2.23810900 | -1.65401300 | -1.78589300 |
| C | -1.83336300 | -0.53126600 | -1.01894400 |
| C | -2.59511000 | 0.65912000  | -1.10042900 |

|    |             |             |             |
|----|-------------|-------------|-------------|
| C  | -3.74634300 | 0.70317600  | -1.86599200 |
| C  | -4.12337200 | -0.40962400 | -2.61441600 |
| H  | -3.64303600 | -2.43078900 | -3.19803300 |
| H  | -1.63173800 | -2.55264400 | -1.78790100 |
| H  | -2.27030200 | 1.54384200  | -0.55353200 |
| H  | -4.33434500 | 1.61603600  | -1.90404700 |
| H  | -5.01351600 | -0.36417300 | -3.23823900 |
| C  | -0.66658400 | -0.57020700 | -0.20831600 |
| C  | -0.20951700 | -1.77275900 | 0.54507100  |
| N  | 1.22972000  | -1.96674300 | 0.47425200  |
| S  | 2.01488500  | -1.88938600 | -1.00808400 |
| O  | 2.90425600  | -3.03963200 | -1.09156400 |
| O  | 0.93578400  | -1.69877600 | -1.98105800 |
| C  | 3.00005100  | -0.41974900 | -0.98877700 |
| C  | 3.90853600  | -0.20930700 | 0.04903300  |
| C  | 2.89014400  | 0.47108200  | -2.05174900 |
| C  | 4.68643500  | 0.93550500  | 0.03136700  |
| H  | 3.99745100  | -0.92157000 | 0.86660100  |
| C  | 3.68356600  | 1.61093600  | -2.04917600 |
| H  | 2.16289500  | 0.30216300  | -2.83987900 |
| C  | 4.57427200  | 1.86642300  | -1.00763300 |
| H  | 5.38231200  | 1.12665300  | 0.84630600  |
| H  | 3.57185100  | 2.33264000  | -2.85656300 |
| C  | 5.35057500  | 3.14441400  | -0.96535000 |
| H  | 6.30838000  | 3.02270000  | -0.44817400 |
| H  | 5.54465700  | 3.53378800  | -1.97007600 |
| H  | 4.77662000  | 3.90633000  | -0.42162500 |
| Au | 0.35299800  | 1.18770400  | 0.21922800  |
| Cl | 0.45348500  | 0.69168200  | 2.50862600  |
| Cl | 1.70955000  | 3.10732400  | 0.63162100  |
| O  | 0.22841000  | 1.58870000  | -1.79047200 |
| O  | 0.62276500  | 3.04268900  | -3.39718700 |
| N  | -1.32987400 | 3.56738900  | -0.50373100 |
| C  | -0.51595900 | 3.89625700  | -1.51172700 |
| C  | -0.26189700 | 5.21453000  | -1.88042100 |
| C  | -0.83705400 | 6.23337100  | -1.13526400 |
| C  | -1.66100200 | 5.89997000  | -0.06684100 |
| C  | -1.88641700 | 4.55355300  | 0.19726100  |
| C  | 0.17177300  | 2.80323500  | -2.29160900 |
| H  | 0.38998800  | 5.40382700  | -2.72743300 |
| H  | -0.64152600 | 7.27472700  | -1.38004900 |
| H  | -2.12504300 | 6.66400200  | 0.55061500  |
| H  | -2.53934100 | 4.25485000  | 1.01772900  |
| C  | 1.86035200  | -2.63026000 | 1.60731100  |
| H  | 2.81684300  | -3.05500800 | 1.29493700  |
| H  | 2.01205600  | -1.91797100 | 2.42875700  |
| H  | 1.22708700  | -3.45864400 | 1.95076000  |

TS6-c:

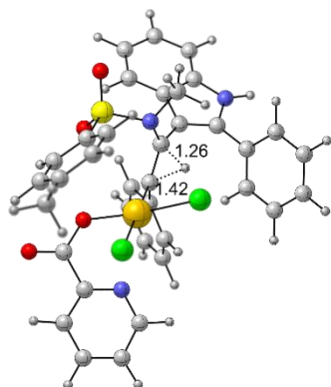

|   |             |             |             |
|---|-------------|-------------|-------------|
| C | -1.71011100 | -6.58684600 | -0.25013900 |
| C | -1.53973700 | -5.29755800 | 0.24845400  |
| C | -0.74572800 | -4.32709900 | -0.40387100 |
| C | -0.08088800 | -4.67811600 | -1.58812000 |
| C | -0.23918800 | -5.96306400 | -2.07997300 |
| C | -1.04589500 | -6.90565300 | -1.42313900 |
| H | -2.33491700 | -7.31327400 | 0.26473700  |
| H | 0.54100000  | -3.95530200 | -2.11174000 |
| H | 0.27256000  | -6.24786500 | -2.99575800 |
| H | -1.15017200 | -7.90409500 | -1.84083100 |
| C | -0.83966600 | -3.12291900 | 0.38374600  |
| C | -1.64293000 | -3.40716800 | 1.47173100  |
| C | -1.96943300 | -2.58830900 | 2.64713900  |
| C | -1.51049500 | -2.97792700 | 3.91155500  |
| C | -2.70912300 | -1.41000000 | 2.52045700  |
| C | -1.76636800 | -2.18484700 | 5.02234600  |
| H | -0.92863300 | -3.89411200 | 4.00762300  |
| C | -2.95976300 | -0.61653300 | 3.63428800  |
| H | -3.09716500 | -1.12589800 | 1.54397600  |
| C | -2.48487800 | -0.99951000 | 4.88356700  |
| H | -1.39430200 | -2.48507900 | 5.99881900  |
| H | -3.52559500 | 0.30537300  | 3.52258500  |
| H | -2.67305200 | -0.37405900 | 5.75255500  |
| N | -2.05276200 | -4.71539400 | 1.38916100  |
| H | -0.42101500 | -1.13805900 | 1.16951300  |
| H | -2.70677400 | -5.13971300 | 2.02944300  |
| C | -3.35550000 | -1.12470900 | -2.46248400 |
| C | -2.13994300 | -1.31697500 | -1.82235200 |
| C | -1.76908100 | -0.47538500 | -0.76251200 |
| C | -2.62577300 | 0.56050600  | -0.36231800 |
| C | -3.85610700 | 0.71924100  | -0.98043300 |
| C | -4.21721200 | -0.11771100 | -2.03495800 |
| H | -3.63275900 | -1.76435800 | -3.29609600 |
| H | -1.45539000 | -2.09521200 | -2.15240000 |
| H | -2.31477800 | 1.22556000  | 0.44151500  |
| H | -4.52490400 | 1.51366700  | -0.65813900 |
| H | -5.17309200 | 0.02366700  | -2.53397800 |
| C | -0.45419100 | -0.63907200 | -0.16249100 |
| C | 0.01268200  | -1.91145500 | 0.26769000  |



|    |             |             |             |
|----|-------------|-------------|-------------|
| N  | 1.39303700  | -2.10240700 | 0.45891400  |
| S  | 2.40501400  | -2.02433800 | -0.93954000 |
| O  | 3.28489500  | -3.17485300 | -0.80436700 |
| O  | 1.50397800  | -1.89256000 | -2.07708400 |
| C  | 3.34595400  | -0.54096600 | -0.78167900 |
| C  | 4.07344100  | -0.30474000 | 0.38574900  |
| C  | 3.40262300  | 0.32683500  | -1.86813500 |
| C  | 4.84039400  | 0.84327600  | 0.46926500  |
| H  | 4.02263400  | -0.99448800 | 1.22540900  |
| C  | 4.18377800  | 1.46951400  | -1.76140700 |
| H  | 2.80833400  | 0.13825900  | -2.75669600 |
| C  | 4.89487200  | 1.75070800  | -0.59556600 |
| H  | 5.39143000  | 1.05853700  | 1.38279700  |
| H  | 4.20132300  | 2.17554100  | -2.58957300 |
| C  | 5.64981800  | 3.03379200  | -0.45540700 |
| H  | 6.51763100  | 2.92652900  | 0.20412800  |
| H  | 5.99230600  | 3.41071600  | -1.42450900 |
| H  | 4.99349300  | 3.79705300  | -0.01685200 |
| Au | 0.64368300  | 1.08395500  | 0.18974100  |
| Cl | 0.54525700  | 0.58471800  | 2.48812200  |
| Cl | 1.90981600  | 3.05942400  | 0.59781300  |
| O  | 0.72991700  | 1.31660800  | -1.84641400 |
| O  | 1.17886900  | 2.68670100  | -3.51072500 |
| N  | -1.08785400 | 3.19606800  | -0.84624300 |
| C  | -0.27617200 | 3.53348000  | -1.85097600 |
| C  | -0.22905400 | 4.81702100  | -2.38874600 |
| C  | -1.03993300 | 5.79704000  | -1.83442800 |
| C  | -1.87827900 | 5.45662600  | -0.77930700 |
| C  | -1.86913700 | 4.14038100  | -0.32945500 |
| C  | 0.61935000  | 2.47813200  | -2.44876900 |
| H  | 0.44297400  | 5.01093300  | -3.21892500 |
| H  | -1.01834100 | 6.81430000  | -2.21834200 |
| H  | -2.52701000 | 6.19203500  | -0.31136700 |
| H  | -2.52023400 | 3.83454000  | 0.49247200  |
| C  | 1.79985000  | -3.01839200 | 1.52788600  |
| H  | 2.88038600  | -2.95761000 | 1.66295700  |
| H  | 1.31482300  | -2.69030400 | 2.45353300  |
| H  | 1.53781400  | -4.06068300 | 1.30766100  |

PD-c:

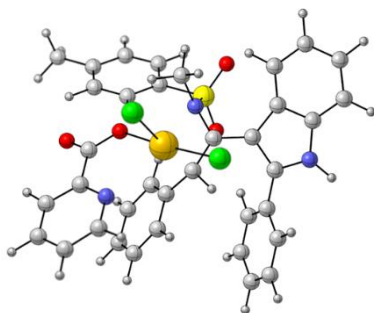

|   |             |             |             |
|---|-------------|-------------|-------------|
| C | -0.81170200 | -5.71017700 | 2.15900600  |
| C | -1.05535900 | -4.53379400 | 1.46770500  |
| C | -0.05466700 | -3.76731100 | 0.84408300  |
| C | 1.26043300  | -4.23012300 | 0.91051100  |
| C | 1.52350600  | -5.40929100 | 1.59602600  |
| C | 0.50693700  | -6.14004000 | 2.21808800  |
| H | -1.61629100 | -6.26654000 | 2.63342700  |
| H | 2.06306900  | -3.71703200 | 0.39415900  |
| H | 2.54515100  | -5.77732200 | 1.63728200  |
| H | 0.74881300  | -7.05836900 | 2.74635600  |
| C | -0.71975300 | -2.58300100 | 0.29969600  |
| C | -2.11642900 | -2.77695500 | 0.53007200  |
| C | -3.26563700 | -2.05315300 | -0.00140900 |
| C | -4.35916400 | -1.75766300 | 0.82149600  |
| C | -3.27378800 | -1.66502700 | -1.34872400 |
| C | -5.44737000 | -1.06951400 | 0.30128800  |
| H | -4.32453700 | -2.01937700 | 1.87843600  |
| C | -4.36801000 | -0.97952500 | -1.85755400 |
| H | -2.42103100 | -1.90322900 | -1.98408200 |
| C | -5.45241100 | -0.68135700 | -1.03664500 |
| H | -6.28773800 | -0.82276900 | 0.94505900  |
| H | -4.36466000 | -0.66522100 | -2.89839000 |
| H | -6.30311400 | -0.13651200 | -1.43847500 |
| N | -2.27934100 | -3.90182200 | 1.23933900  |
| H | -1.79909600 | -0.34753500 | 0.64678700  |
| H | -3.18581400 | -4.30396800 | 1.43948600  |
| C | -1.26221200 | 1.91218500  | -3.18310700 |
| C | -0.80369900 | 0.93616300  | -2.30520400 |
| C | -1.30700400 | 0.86145200  | -1.00443700 |
| C | -2.31730000 | 1.76101000  | -0.62726300 |
| C | -2.77698400 | 2.73134200  | -1.50309900 |
| C | -2.23955200 | 2.81835200  | -2.78603600 |
| H | -0.84840700 | 1.95777300  | -4.18764900 |
| H | -0.07206500 | 0.21577400  | -2.64974500 |
| H | -2.73271900 | 1.69185800  | 0.37918500  |
| H | -3.55044600 | 3.42589600  | -1.18198500 |
| H | -2.58962100 | 3.58271300  | -3.47591800 |
| C | -0.93888800 | -0.15135500 | 0.00995300  |
| C | -0.18409300 | -1.37797000 | -0.17216000 |
| N | 1.13461000  | -1.38419700 | -0.71333900 |

|    |             |             |             |
|----|-------------|-------------|-------------|
| S  | 1.35969000  | -2.18534600 | -2.18310800 |
| O  | 2.09630300  | -3.43198900 | -2.01024000 |
| O  | 0.02929700  | -2.22868200 | -2.78541400 |
| C  | 2.43383200  | -1.06383000 | -3.04665000 |
| C  | 3.17880600  | -1.60145600 | -4.09565800 |
| C  | 2.50309900  | 0.29188200  | -2.73343100 |
| C  | 3.98274400  | -0.75691100 | -4.84760700 |
| H  | 3.13131700  | -2.66609300 | -4.31098800 |
| C  | 3.32167200  | 1.11665700  | -3.49235700 |
| H  | 1.95767400  | 0.71936800  | -1.89534000 |
| C  | 4.06730700  | 0.60892600  | -4.55848100 |
| H  | 4.56407300  | -1.16488600 | -5.67316900 |
| H  | 3.36669200  | 2.17175000  | -3.22495600 |
| C  | 4.96626500  | 1.50618100  | -5.35272800 |
| H  | 5.17405100  | 1.09541300  | -6.34623300 |
| H  | 4.52763100  | 2.50202900  | -5.47538300 |
| H  | 5.92983300  | 1.64101600  | -4.84521600 |
| Au | 0.29396800  | 0.79491800  | 1.57416000  |
| Cl | -0.91609000 | -0.46282100 | 3.14206300  |
| Cl | 1.75462300  | 1.70291800  | 3.23920700  |
| O  | 1.40218500  | 1.68626700  | 0.05255000  |
| O  | 1.88979300  | 3.29062600  | -1.37691800 |
| N  | -0.50192300 | 3.34923200  | 1.23794900  |
| C  | 0.25287500  | 3.81767100  | 0.24416200  |
| C  | 0.13654700  | 5.11947500  | -0.23730200 |
| C  | -0.79856100 | 5.95950400  | 0.35100800  |
| C  | -1.57792100 | 5.47522700  | 1.39630000  |
| C  | -1.39061800 | 4.15902400  | 1.80598800  |
| C  | 1.25102700  | 2.89478100  | -0.41118000 |
| H  | 0.77691800  | 5.43201900  | -1.05621900 |
| H  | -0.91754000 | 6.98262000  | 0.00178000  |
| H  | -2.31615400 | 6.10246000  | 1.88861100  |
| H  | -1.97669500 | 3.73321000  | 2.62136300  |
| C  | 2.32173900  | -1.18093600 | 0.14319300  |
| H  | 2.62695200  | -0.13061400 | 0.15243400  |
| H  | 2.10752500  | -1.51234300 | 1.16602600  |
| H  | 3.14002200  | -1.79540100 | -0.24847300 |

**IM3-d:**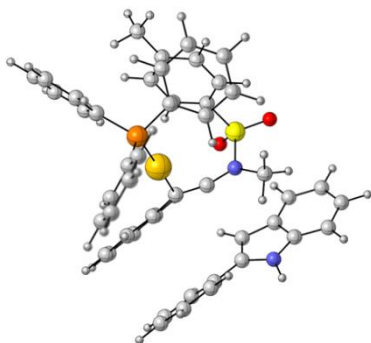

|   |             |             |             |
|---|-------------|-------------|-------------|
| C | -5.21171800 | -0.18646800 | -4.03529000 |
| C | -5.04496100 | 0.06628400  | -2.67520500 |
| C | -4.77501400 | 1.36168800  | -2.17215300 |
| C | -4.62487800 | 2.42431300  | -3.07443000 |
| C | -4.77206300 | 2.17556000  | -4.42897600 |
| C | -5.07327700 | 0.88717200  | -4.90341500 |
| H | -5.43490000 | -1.18560300 | -4.40382300 |
| H | -4.38916800 | 3.42332200  | -2.71337900 |
| H | -4.65474600 | 2.98894200  | -5.14024100 |
| H | -5.19669300 | 0.72805900  | -5.97179000 |
| C | -4.66235500 | 1.24075000  | -0.75150700 |
| C | -4.82982300 | -0.08509900 | -0.43212200 |
| C | -4.76210600 | -0.75578100 | 0.86181500  |
| C | -4.21266600 | -2.03965900 | 0.97394000  |
| C | -5.23111100 | -0.11691800 | 2.01514300  |
| C | -4.14158300 | -2.67169500 | 2.21011500  |
| H | -3.81912000 | -2.53448800 | 0.08581600  |
| C | -5.15543400 | -0.74944100 | 3.24848200  |
| H | -5.67484700 | 0.87329000  | 1.92979200  |
| C | -4.61425900 | -2.02886800 | 3.35086900  |
| H | -3.71834400 | -3.67109200 | 2.28208800  |
| H | -5.53073500 | -0.24396100 | 4.13548200  |
| H | -4.56765100 | -2.52631100 | 4.31670500  |
| N | -5.03089500 | -0.80529900 | -1.60260200 |
| H | -4.44597800 | 2.03339400  | -0.04454000 |
| H | -5.41839200 | -1.73765600 | -1.61596300 |
| C | -2.36486400 | 0.86444200  | 4.25044800  |
| C | -1.81218000 | 0.40104900  | 3.06417800  |
| C | -1.94064500 | 1.15343400  | 1.89222700  |
| C | -2.59424900 | 2.39359900  | 1.93030000  |
| C | -3.12515600 | 2.85965900  | 3.12589000  |
| C | -3.01745400 | 2.09405000  | 4.28462400  |
| H | -2.28123500 | 0.26563300  | 5.15410100  |
| H | -1.29929500 | -0.55972400 | 3.02950700  |
| H | -2.65107600 | 2.99218700  | 1.02161100  |
| H | -3.62220300 | 3.82603300  | 3.15407600  |
| H | -3.43605500 | 2.46108900  | 5.21842100  |
| C | -1.34017100 | 0.71114200  | 0.64211000  |
| C | -1.60949500 | 0.75952400  | -0.60373100 |

|   |             |             |             |
|---|-------------|-------------|-------------|
| N | -1.57768900 | 0.91816400  | -1.88043600 |
| S | -0.96097600 | 2.49591600  | -2.46020800 |
| O | -1.12467400 | 2.42010800  | -3.89519500 |
| O | -1.62016200 | 3.47059400  | -1.61649500 |
| C | 0.74569100  | 2.40120000  | -2.02846300 |
| C | 1.62002300  | 1.74168000  | -2.88947000 |
| C | 1.18535700  | 2.98440200  | -0.83972200 |
| C | 2.96513500  | 1.67921300  | -2.55244800 |
| H | 1.25674500  | 1.31400200  | -3.82171100 |
| C | 2.53748500  | 2.91943000  | -0.53184100 |
| H | 0.47969300  | 3.50240200  | -0.19383800 |
| C | 3.44494300  | 2.27383400  | -1.38110000 |
| H | 3.66173000  | 1.17069400  | -3.21720600 |
| H | 2.90595100  | 3.39609800  | 0.37623800  |
| C | 4.90289400  | 2.24512300  | -1.04131700 |
| H | 5.48415100  | 1.71042200  | -1.79879400 |
| H | 5.30531100  | 3.26197400  | -0.96330600 |
| H | 5.07418400  | 1.76053900  | -0.06961800 |
| C | -1.84081600 | -0.14686500 | -2.85868800 |
| H | -0.88507500 | -0.55194100 | -3.21618100 |
| H | -2.41423700 | -0.92480500 | -2.34752500 |
| H | -2.42089400 | 0.25085800  | -3.69447000 |
| P | 2.64514900  | -1.36731500 | 0.58498800  |
| C | 3.89196500  | -0.51577300 | 1.59396200  |
| C | 5.11008100  | -1.13419400 | 1.89988600  |
| C | 3.63222600  | 0.77418400  | 2.06468800  |
| C | 6.06839200  | -0.45098800 | 2.63804000  |
| H | 5.30488000  | -2.15309100 | 1.56547700  |
| C | 4.59134700  | 1.45137900  | 2.81149300  |
| H | 2.67486700  | 1.24704300  | 1.84291600  |
| C | 5.81070800  | 0.84179800  | 3.08989900  |
| H | 7.01533900  | -0.93090200 | 2.87080400  |
| H | 4.38368600  | 2.45319700  | 3.17979000  |
| H | 6.56080000  | 1.37035000  | 3.67262700  |
| C | 3.29162100  | -1.50975800 | -1.11257600 |
| C | 2.40204300  | -1.93962500 | -2.10502600 |
| C | 4.61529500  | -1.22464800 | -1.44975500 |
| C | 2.83332600  | -2.08428500 | -3.41710400 |
| H | 1.36691700  | -2.16524400 | -1.84346100 |
| C | 5.04300700  | -1.36700100 | -2.76796200 |
| H | 5.31554000  | -0.88537000 | -0.68823000 |
| C | 4.15572000  | -1.79522500 | -3.75004900 |
| H | 2.13948600  | -2.42437000 | -4.18209200 |
| H | 6.07617000  | -1.14528100 | -3.02507600 |
| H | 4.49433300  | -1.90784200 | -4.77686900 |
| C | 2.55365200  | -3.06519400 | 1.22845600  |
| C | 1.80735700  | -3.28442100 | 2.39141300  |
| C | 3.23340700  | -4.12567600 | 0.62504500  |
| C | 1.74939400  | -4.55452500 | 2.94983000  |
| H | 1.27271100  | -2.45618100 | 2.85913900  |

|    |            |             |             |
|----|------------|-------------|-------------|
| C  | 3.16598800 | -5.39713600 | 1.18641700  |
| H  | 3.81220100 | -3.96134900 | -0.28281300 |
| C  | 2.42732400 | -5.61072800 | 2.34555600  |
| H  | 1.17031100 | -4.72321300 | 3.85399600  |
| H  | 3.69292600 | -6.22295600 | 0.71548500  |
| H  | 2.37634400 | -6.60595000 | 2.77966600  |
| Au | 0.56764500 | -0.26911400 | 0.58843600  |

**TS4-d:**

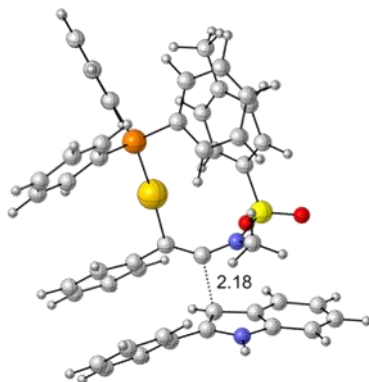

|   |            |             |             |
|---|------------|-------------|-------------|
| C | 2.47819900 | -3.04965000 | -7.84548500 |
| C | 2.74171400 | -3.11313600 | -6.48269100 |
| C | 3.02830000 | -1.97927600 | -5.70076400 |
| C | 3.03576000 | -0.72267300 | -6.30902100 |
| C | 2.75793300 | -0.64057400 | -7.66521200 |
| C | 2.48866400 | -1.78765500 | -8.42410100 |
| H | 2.26086700 | -3.94088800 | -8.42950300 |
| H | 3.27166100 | 0.16751600  | -5.73306800 |
| H | 2.75673700 | 0.32998300  | -8.15343800 |
| H | 2.28189400 | -1.68782100 | -9.48627200 |
| C | 3.31737900 | -2.44947700 | -4.36528600 |
| C | 3.04569900 | -3.83129800 | -4.36117200 |
| C | 3.00752100 | -4.77501500 | -3.25069300 |
| C | 3.47119500 | -6.08761800 | -3.40704400 |
| C | 2.47799900 | -4.37571800 | -2.01965500 |
| C | 3.40506100 | -6.98379700 | -2.34897400 |
| H | 3.90928000 | -6.40040400 | -4.35492000 |
| C | 2.39976200 | -5.27950300 | -0.96855700 |
| H | 2.11722400 | -3.35631900 | -1.89441700 |
| C | 2.86363600 | -6.58150700 | -1.12957100 |
| H | 3.77326900 | -7.99871500 | -2.47484600 |
| H | 1.97860700 | -4.96212200 | -0.01794200 |
| H | 2.80154700 | -7.28713900 | -0.30496900 |
| N | 2.78347000 | -4.22209700 | -5.63600100 |
| H | 3.34310700 | -1.84286900 | -3.46765500 |
| H | 2.48341400 | -5.15453100 | -5.88492000 |
| C | 4.87675300 | -3.22848200 | 0.42845700  |
| C | 5.40337000 | -3.56805900 | -0.81039900 |
| C | 5.38877700 | -2.64333600 | -1.86147000 |
| C | 4.88604200 | -1.35534900 | -1.63007800 |
| C | 4.37043000 | -1.01724600 | -0.38353900 |

|   |             |             |             |
|---|-------------|-------------|-------------|
| C | 4.35515600  | -1.95488700 | 0.64522800  |
| H | 4.87328100  | -3.96244500 | 1.23128600  |
| H | 5.80327700  | -4.56727500 | -0.98709500 |
| H | 4.92634100  | -0.61994600 | -2.43393000 |
| H | 3.98551000  | -0.01464400 | -0.21381300 |
| H | 3.95242400  | -1.68854400 | 1.61914900  |
| C | 5.96497600  | -2.96955700 | -3.16585000 |
| C | 5.44962900  | -2.92131900 | -4.37008400 |
| N | 5.81433100  | -2.93544500 | -5.65131900 |
| S | 6.45471600  | -1.46058300 | -6.32665500 |
| O | 6.22126600  | -1.59166300 | -7.75176400 |
| O | 5.90444700  | -0.39447800 | -5.51197900 |
| C | 8.19144100  | -1.55215800 | -6.01096400 |
| C | 9.02275600  | -2.22250900 | -6.90509900 |
| C | 8.70317100  | -0.91350000 | -4.88018200 |
| C | 10.38818200 | -2.25874700 | -6.65202300 |
| H | 8.60950200  | -2.67709300 | -7.80285500 |
| C | 10.07283400 | -0.94443400 | -4.66059600 |
| H | 8.03390000  | -0.37425500 | -4.21389800 |
| C | 10.93293200 | -1.61876900 | -5.53528800 |
| H | 11.04780300 | -2.78163800 | -7.34254200 |
| H | 10.49295700 | -0.42262200 | -3.80125600 |
| C | 12.40789100 | -1.62454500 | -5.27692100 |
| H | 12.94247700 | -2.25924900 | -5.99065400 |
| H | 12.82237400 | -0.61216100 | -5.35397300 |
| H | 12.62888100 | -1.98159300 | -4.26101400 |
| C | 5.96350600  | -4.15332300 | -6.44921200 |
| H | 7.02969300  | -4.36326900 | -6.62194500 |
| H | 5.53533700  | -4.98029900 | -5.87701200 |
| H | 5.44817600  | -4.04827600 | -7.40802500 |
| P | 10.00624800 | -4.89243400 | -3.12668700 |
| C | 11.34132900 | -3.99271300 | -2.28347700 |
| C | 12.56519700 | -4.61159100 | -2.00199700 |
| C | 11.13520400 | -2.66399700 | -1.90502200 |
| C | 13.58116800 | -3.89221200 | -1.38544200 |
| H | 12.71969300 | -5.65933200 | -2.25938400 |
| C | 12.15261500 | -1.94863700 | -1.28048700 |
| H | 10.17116600 | -2.19419900 | -2.10014700 |
| C | 13.37673600 | -2.56025500 | -1.02984900 |
| H | 14.53214900 | -4.37332700 | -1.17203300 |
| H | 11.98617100 | -0.91564700 | -0.98430000 |
| H | 14.17247700 | -2.00236900 | -0.54274600 |
| C | 10.57325600 | -5.28712000 | -4.81443300 |
| C | 9.62708800  | -5.83283200 | -5.69079000 |
| C | 11.87741000 | -5.07179000 | -5.26050600 |
| C | 9.98121400  | -6.15758000 | -6.99364600 |
| H | 8.60718300  | -6.00695400 | -5.34297000 |
| C | 12.22932800 | -5.39770000 | -6.56849400 |
| H | 12.62230900 | -4.64302700 | -4.59231200 |
| C | 11.28488600 | -5.93752200 | -7.43493800 |

|    |             |             |             |
|----|-------------|-------------|-------------|
| H  | 9.24151400  | -6.58486600 | -7.66676400 |
| H  | 13.24854000 | -5.22885000 | -6.90870800 |
| H  | 11.56389300 | -6.19108400 | -8.45457000 |
| C  | 9.89123700  | -6.49475700 | -2.26761300 |
| C  | 9.18858400  | -6.53461900 | -1.05837600 |
| C  | 10.50971900 | -7.64971000 | -2.75117600 |
| C  | 9.11430100  | -7.71864800 | -0.33606900 |
| H  | 8.70202300  | -5.63267600 | -0.68350900 |
| C  | 10.42551000 | -8.83480000 | -2.02641000 |
| H  | 11.05498300 | -7.62596600 | -3.69380800 |
| C  | 9.73111600  | -8.86917600 | -0.82167200 |
| H  | 8.57098100  | -7.74604100 | 0.60504500  |
| H  | 10.90604700 | -9.73346800 | -2.40480300 |
| H  | 9.66817600  | -9.79694800 | -0.25863400 |
| Au | 7.92836600  | -3.76922700 | -3.17694300 |

**IM4-d:**

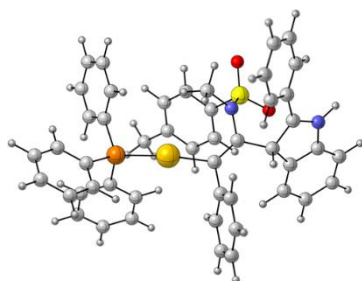

|   |             |             |             |
|---|-------------|-------------|-------------|
| C | -5.12088400 | 3.75103600  | -2.10109800 |
| C | -4.76186600 | 2.51971600  | -1.58633600 |
| C | -3.80259000 | 2.33848100  | -0.59243000 |
| C | -3.15830300 | 3.44586400  | -0.07055700 |
| C | -3.49532700 | 4.70342600  | -0.57468600 |
| C | -4.45941300 | 4.85586800  | -1.57156200 |
| H | -5.87019300 | 3.85517700  | -2.88120500 |
| H | -2.41352500 | 3.33766500  | 0.71473700  |
| H | -2.99718300 | 5.58524200  | -0.18036700 |
| H | -4.69851600 | 5.84878700  | -1.94162500 |
| C | -3.70541700 | 0.86597700  | -0.28404400 |
| C | -4.66197800 | 0.27670000  | -1.26707100 |
| C | -4.92800900 | -1.12369200 | -1.49803500 |
| C | -5.16671600 | -1.58818200 | -2.79967100 |
| C | -4.90793100 | -2.02449600 | -0.42433600 |
| C | -5.39775700 | -2.93803800 | -3.01735100 |
| H | -5.09680600 | -0.90388800 | -3.64412600 |
| C | -5.16190600 | -3.36870400 | -0.64868600 |
| H | -4.71574900 | -1.66203700 | 0.58399600  |
| C | -5.40555800 | -3.82493100 | -1.94300900 |
| H | -5.55932200 | -3.30219600 | -4.02788600 |
| H | -5.16881800 | -4.06503600 | 0.18528500  |
| H | -5.59255700 | -4.88141500 | -2.11664600 |
| N | -5.24187100 | 1.24192200  | -1.94503800 |
| H | -4.13962000 | 0.70843600  | 0.72298400  |
| H | -5.93618100 | 1.07551500  | -2.66641800 |



|   |             |             |             |
|---|-------------|-------------|-------------|
| C | -3.34580800 | 0.81749900  | 4.05120000  |
| C | -2.94571900 | 0.27165500  | 2.83494700  |
| C | -1.93254000 | 0.87039500  | 2.07248600  |
| C | -1.30951000 | 2.01673500  | 2.58955600  |
| C | -1.71887600 | 2.56879100  | 3.79678000  |
| C | -2.74134400 | 1.97322600  | 4.53270600  |
| H | -4.12884900 | 0.33121000  | 4.62858100  |
| H | -3.39602500 | -0.65687300 | 2.48113900  |
| H | -0.49213300 | 2.46998000  | 2.02536800  |
| H | -1.22885100 | 3.46380400  | 4.17326000  |
| H | -3.05307500 | 2.40033600  | 5.48215700  |
| C | -1.49231800 | 0.27718100  | 0.79422200  |
| C | -2.31497400 | 0.20210200  | -0.26842800 |
| N | -2.00721300 | -0.56970500 | -1.43534700 |
| S | -1.59463700 | 0.21456100  | -2.86270600 |
| O | -1.61306700 | -0.80610700 | -3.89913100 |
| O | -2.47296900 | 1.37722200  | -2.93792800 |
| C | 0.06622300  | 0.79777600  | -2.67506300 |
| C | 1.11779700  | 0.00281900  | -3.12326700 |
| C | 0.29859900  | 2.03939900  | -2.08392100 |
| C | 2.41957600  | 0.46509600  | -2.98236800 |
| H | 0.91101500  | -0.94999300 | -3.60550900 |
| C | 1.60794800  | 2.48465400  | -1.95691800 |
| H | -0.54096000 | 2.65450700  | -1.76571400 |
| C | 2.68471000  | 1.70930500  | -2.40343000 |
| H | 3.24785400  | -0.14508500 | -3.34127400 |
| H | 1.80442400  | 3.46508100  | -1.52267900 |
| C | 4.09326400  | 2.19705300  | -2.25590300 |
| H | 4.74372500  | 1.78761200  | -3.03600000 |
| H | 4.14798500  | 3.29017400  | -2.29879400 |
| H | 4.51206600  | 1.89416200  | -1.28484700 |
| C | -1.51752000 | -1.94131200 | -1.30355500 |
| H | -0.41939200 | -2.00361900 | -1.25892200 |
| H | -1.91830500 | -2.34758900 | -0.37116600 |
| H | -1.88011800 | -2.53518400 | -2.14821600 |
| P | 2.82925800  | -0.79370200 | 1.02298200  |
| C | 3.78707200  | 0.71243600  | 1.39079500  |
| C | 5.09276900  | 0.64138800  | 1.88935100  |
| C | 3.20827100  | 1.96184700  | 1.15056600  |
| C | 5.81659000  | 1.80618700  | 2.11399200  |
| H | 5.54074000  | -0.32846100 | 2.10537100  |
| C | 3.93431200  | 3.12623500  | 1.38093500  |
| H | 2.18756100  | 2.01684800  | 0.76923700  |
| C | 5.23911600  | 3.04787900  | 1.85653900  |
| H | 6.83182100  | 1.74655100  | 2.49785900  |
| H | 3.47945600  | 4.09545500  | 1.18819600  |
| H | 5.80760900  | 3.95684700  | 2.03689200  |
| C | 3.58036700  | -1.54514400 | -0.45984800 |
| C | 2.88918900  | -2.60313900 | -1.06112600 |
| C | 4.79425300  | -1.12119300 | -1.00226600 |

|    |            |             |             |
|----|------------|-------------|-------------|
| C  | 3.40319000 | -3.22493500 | -2.19158600 |
| H  | 1.94293100 | -2.94046200 | -0.63538300 |
| C  | 5.30406600 | -1.74129800 | -2.14057300 |
| H  | 5.34403200 | -0.30170900 | -0.54220400 |
| C  | 4.61028400 | -2.78979300 | -2.73602500 |
| H  | 2.86247100 | -4.04864200 | -2.65108000 |
| H  | 6.24898700 | -1.40395700 | -2.55993500 |
| H  | 5.01117900 | -3.27261300 | -3.62374500 |
| C  | 3.21334000 | -1.94373400 | 2.38346100  |
| C  | 2.51684400 | -1.78330100 | 3.58611900  |
| C  | 4.18989800 | -2.93634300 | 2.27330800  |
| C  | 2.80290400 | -2.60290100 | 4.67051000  |
| H  | 1.74794000 | -1.01413400 | 3.66852900  |
| C  | 4.46725800 | -3.75878100 | 3.36098400  |
| H  | 4.73235400 | -3.06957400 | 1.33823400  |
| C  | 3.77674700 | -3.59188500 | 4.55696800  |
| H  | 2.25994400 | -2.47514200 | 5.60352400  |
| H  | 5.22587000 | -4.53242400 | 3.27243400  |
| H  | 3.99530700 | -4.23757300 | 5.40383800  |
| Au | 0.51328800 | -0.31045200 | 0.81317700  |

**TS5-d:**

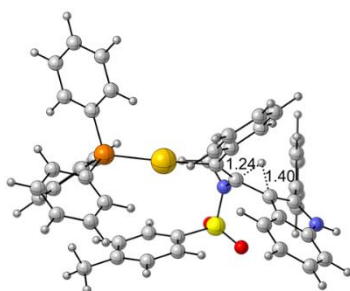

|   |             |             |             |
|---|-------------|-------------|-------------|
| C | -5.38789100 | 2.40089700  | -1.21542400 |
| C | -4.97562700 | 1.08090200  | -1.08646500 |
| C | -3.82578300 | 0.70841600  | -0.35994700 |
| C | -3.04279800 | 1.70487800  | 0.22805300  |
| C | -3.44464300 | 3.02664700  | 0.09912800  |
| C | -4.60637300 | 3.37070300  | -0.60457200 |
| H | -6.27627400 | 2.66367500  | -1.78417700 |
| H | -2.14500400 | 1.45196700  | 0.78568400  |
| H | -2.85012000 | 3.81233600  | 0.55796500  |
| H | -4.89583800 | 4.41521100  | -0.68169900 |
| C | -3.70937000 | -0.72147100 | -0.51444000 |
| C | -4.79651400 | -1.15701000 | -1.28568600 |
| C | -5.13706900 | -2.50459000 | -1.73830600 |
| C | -5.27583500 | -2.76091100 | -3.10640900 |
| C | -5.29100400 | -3.54701000 | -0.81797800 |
| C | -5.54896500 | -4.05065000 | -3.54396000 |
| H | -5.10954100 | -1.95612600 | -3.82026400 |
| C | -5.57124000 | -4.83324600 | -1.26118800 |
| H | -5.22658500 | -3.34155600 | 0.25143200  |
| C | -5.69708100 | -5.08555000 | -2.62464600 |

|   |             |             |             |
|---|-------------|-------------|-------------|
| H | -5.63570500 | -4.25055700 | -4.60848200 |
| H | -5.70296100 | -5.63768800 | -0.54212800 |
| H | -5.91386900 | -6.09251700 | -2.97173500 |
| N | -5.52717900 | -0.07169400 | -1.62917800 |
| H | -3.52551700 | -1.82523100 | 0.32833100  |
| H | -6.37938100 | -0.11987100 | -2.17047400 |
| C | -3.72786300 | -0.68790400 | 3.87987900  |
| C | -3.30651100 | -1.22951900 | 2.67371600  |
| C | -2.08353600 | -0.84930100 | 2.09393300  |
| C | -1.27853500 | 0.06045000  | 2.80583500  |
| C | -1.71421400 | 0.62400900  | 3.99576900  |
| C | -2.94195400 | 0.25273100  | 4.53836100  |
| H | -4.67070100 | -1.01072700 | 4.31382900  |
| H | -3.92088000 | -2.00014600 | 2.20567300  |
| H | -0.31053700 | 0.34393400  | 2.39009300  |
| H | -1.08487000 | 1.34429700  | 4.51227400  |
| H | -3.27443800 | 0.67756800  | 5.48169400  |
| C | -1.60571300 | -1.39118300 | 0.81991400  |
| C | -2.46480700 | -1.58763400 | -0.26115300 |
| N | -2.14343700 | -2.44769400 | -1.34376200 |
| S | -1.74005400 | -1.79476700 | -2.85891900 |
| O | -1.70299400 | -2.93726800 | -3.75469300 |
| O | -2.62270300 | -0.66373600 | -3.09496800 |
| C | -0.09235200 | -1.15739300 | -2.69881500 |
| C | 0.98343200  | -1.95593300 | -3.07600100 |
| C | 0.09641800  | 0.14868300  | -2.24771500 |
| C | 2.26807200  | -1.43281000 | -3.00246700 |
| H | 0.80747900  | -2.95939200 | -3.45723500 |
| C | 1.38940700  | 0.65181900  | -2.18176900 |
| H | -0.76354600 | 0.76574200  | -1.99228000 |
| C | 2.49085300  | -0.12593300 | -2.55980700 |
| H | 3.11543500  | -2.04441500 | -3.31095900 |
| H | 1.55181600  | 1.67954100  | -1.85659200 |
| C | 3.88142900  | 0.42564500  | -2.48297000 |
| H | 4.53413100  | -0.02525900 | -3.23790800 |
| H | 3.89267600  | 1.51204200  | -2.62120100 |
| H | 4.32874300  | 0.22335900  | -1.49830000 |
| C | -1.72144400 | -3.82450200 | -1.09618200 |
| H | -0.62742100 | -3.93984000 | -1.06701000 |
| H | -2.12328000 | -4.12657500 | -0.12424900 |
| H | -2.13451200 | -4.47358900 | -1.87317000 |
| P | 2.74042300  | -2.32696200 | 0.99940900  |
| C | 3.64626500  | -0.77065400 | 1.27101100  |
| C | 4.94399100  | -0.77109200 | 1.79500200  |
| C | 3.03869300  | 0.44239600  | 0.93401100  |
| C | 5.63218000  | 0.42626500  | 1.94856400  |
| H | 5.41369700  | -1.71062000 | 2.08583500  |
| C | 3.72936700  | 1.63978200  | 1.09325800  |
| H | 2.02576900  | 0.44351000  | 0.52857900  |
| C | 5.02687700  | 1.63045600  | 1.59444800  |

|    |            |             |             |
|----|------------|-------------|-------------|
| H  | 6.64160700 | 0.42187300  | 2.35166700  |
| H  | 3.25319800 | 2.57983800  | 0.82346100  |
| H  | 5.56825200 | 2.56496900  | 1.71849800  |
| C  | 3.53753700 | -3.17788900 | -0.39986300 |
| C  | 2.89194100 | -4.30548200 | -0.91997500 |
| C  | 4.74436900 | -2.75526500 | -0.95872700 |
| C  | 3.44512500 | -4.99797200 | -1.98910300 |
| H  | 1.95077000 | -4.64071700 | -0.48139900 |
| C  | 5.29262700 | -3.44706700 | -2.03602000 |
| H  | 5.25720500 | -1.88095300 | -0.56137200 |
| C  | 4.64459700 | -4.56466000 | -2.55199100 |
| H  | 2.94057200 | -5.87483300 | -2.38699800 |
| H  | 6.23123400 | -3.11128200 | -2.47017700 |
| H  | 5.07508200 | -5.10294700 | -3.39261200 |
| C  | 3.09876500 | -3.35006400 | 2.46314700  |
| C  | 2.37278100 | -3.09293700 | 3.63148500  |
| C  | 4.08677400 | -4.33714400 | 2.46116100  |
| C  | 2.64018300 | -3.81266900 | 4.78879600  |
| H  | 1.59511500 | -2.32696000 | 3.63075500  |
| C  | 4.34532800 | -5.05941600 | 3.62222300  |
| H  | 4.65244400 | -4.54449400 | 1.55382400  |
| C  | 3.62502600 | -4.79748700 | 4.78298200  |
| H  | 2.07436300 | -3.61109400 | 5.69473200  |
| H  | 5.11253900 | -5.82949700 | 3.61843300  |
| H  | 3.82883300 | -5.36554800 | 5.68712100  |
| Au | 0.41345700 | -1.90795400 | 0.76549700  |

**IM5-d:**

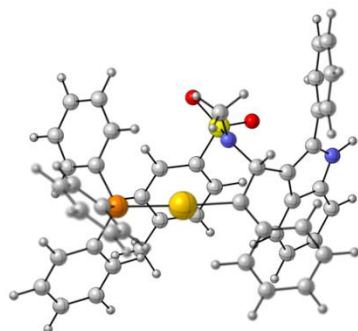

|   |             |             |             |
|---|-------------|-------------|-------------|
| C | -4.42914200 | 3.87717700  | -2.00824700 |
| C | -4.23532400 | 2.55044400  | -1.63183300 |
| C | -3.17197000 | 2.14754700  | -0.78881300 |
| C | -2.29354700 | 3.12441300  | -0.29655800 |
| C | -2.47969000 | 4.44450400  | -0.67110900 |
| C | -3.53525300 | 4.81714500  | -1.51953200 |
| H | -5.24700900 | 4.16395300  | -2.66491100 |
| H | -1.46209300 | 2.85063000  | 0.35422700  |
| H | -1.80095300 | 5.20863100  | -0.29955700 |
| H | -3.65810800 | 5.86200400  | -1.79243900 |
| C | -3.27825600 | 0.72473200  | -0.65678600 |
| C | -4.39613600 | 0.32269800  | -1.36199400 |
| C | -4.91127600 | -1.03187700 | -1.57977700 |

|   |             |             |             |
|---|-------------|-------------|-------------|
| C | -5.01586400 | -1.54437500 | -2.87771200 |
| C | -5.26866900 | -1.83795900 | -0.49235800 |
| C | -5.46159500 | -2.84511700 | -3.07767200 |
| H | -4.69564000 | -0.93075500 | -3.71688400 |
| C | -5.71182900 | -3.13977300 | -0.69729600 |
| H | -5.22897900 | -1.42907100 | 0.51751800  |
| C | -5.80626300 | -3.64468300 | -1.99077700 |
| H | -5.52973400 | -3.24131300 | -4.08758300 |
| H | -5.99603600 | -3.75607700 | 0.15201100  |
| H | -6.15322900 | -4.66207700 | -2.15285700 |
| N | -4.95265700 | 1.41957300  | -1.96148200 |
| H | -2.92691800 | -1.03294300 | 0.40029100  |
| H | -5.78717500 | 1.39178600  | -2.52891300 |
| C | -4.05837600 | 1.44143500  | 3.55378900  |
| C | -3.52112900 | 0.95604300  | 2.37967600  |
| C | -2.11576400 | 0.80535000  | 2.22865400  |
| C | -1.29439200 | 1.20286200  | 3.31542000  |
| C | -1.83470000 | 1.70727000  | 4.48372600  |
| C | -3.21821700 | 1.82112300  | 4.60481300  |
| H | -5.13482100 | 1.54605000  | 3.65582800  |
| H | -4.17864400 | 0.70751900  | 1.55081800  |
| H | -0.21492400 | 1.09850000  | 3.20978900  |
| H | -1.18680100 | 2.00937800  | 5.30146700  |
| H | -3.64925700 | 2.21612700  | 5.52180900  |
| C | -1.48403000 | 0.25959400  | 1.06662000  |
| C | -2.29929800 | -0.25038100 | -0.07707600 |
| N | -1.48324400 | -1.01766000 | -1.04961200 |
| S | -1.14093900 | -0.51598800 | -2.64107600 |
| O | -0.44909500 | -1.65562000 | -3.22604300 |
| O | -2.31110900 | 0.04608800  | -3.30035800 |
| C | 0.03705900  | 0.79921000  | -2.45400000 |
| C | 1.37532200  | 0.46806400  | -2.24941000 |
| C | -0.36290700 | 2.12358100  | -2.59225500 |
| C | 2.31297200  | 1.48607500  | -2.14419400 |
| H | 1.67830500  | -0.57658700 | -2.20801300 |
| C | 0.58785700  | 3.12951300  | -2.46363500 |
| H | -1.40220200 | 2.36075700  | -2.80478700 |
| C | 1.93337100  | 2.82931900  | -2.23715100 |
| H | 3.36365700  | 1.23378500  | -1.99838500 |
| H | 0.27825700  | 4.16963800  | -2.55828500 |
| C | 2.95387600  | 3.92181600  | -2.14087700 |
| H | 3.21289400  | 4.30477800  | -3.13570000 |
| H | 2.57820000  | 4.77235300  | -1.56046200 |
| H | 3.88019400  | 3.56709600  | -1.67566700 |
| C | -1.47755200 | -2.46255300 | -0.80539700 |
| H | -1.17823900 | -2.64061600 | 0.23622700  |
| H | -2.46823500 | -2.91170500 | -0.97605100 |
| H | -0.75313400 | -2.94715300 | -1.46091500 |
| P | 2.84104800  | -0.80024900 | 1.09306600  |
| C | 4.02742900  | 0.55268000  | 1.35236900  |

|    |            |             |             |
|----|------------|-------------|-------------|
| C  | 5.31239600 | 0.29399800  | 1.84123500  |
| C  | 3.65208300 | 1.86399700  | 1.04466200  |
| C  | 6.21424500 | 1.33774300  | 2.00927200  |
| H  | 5.60418800 | -0.72478700 | 2.09502300  |
| C  | 4.55800500 | 2.90559400  | 1.21808300  |
| H  | 2.64939200 | 2.06730400  | 0.66502500  |
| C  | 5.83717400 | 2.64195400  | 1.69825400  |
| H  | 7.21192600 | 1.13433400  | 2.38955500  |
| H  | 4.26036100 | 3.92562400  | 0.98568800  |
| H  | 6.54292800 | 3.45702100  | 1.83741000  |
| C  | 3.32967900 | -1.67122800 | -0.42687200 |
| C  | 2.47416200 | -2.67511900 | -0.89887500 |
| C  | 4.46039600 | -1.32042200 | -1.16508700 |
| C  | 2.74225000 | -3.31223100 | -2.10265100 |
| H  | 1.58393700 | -2.94307300 | -0.32682100 |
| C  | 4.72289800 | -1.96016400 | -2.37451700 |
| H  | 5.13037700 | -0.54093600 | -0.80487100 |
| C  | 3.86489100 | -2.94819500 | -2.84451200 |
| H  | 2.06566700 | -4.07776700 | -2.47342200 |
| H  | 5.60018500 | -1.68058200 | -2.95223200 |
| H  | 4.06690900 | -3.43539200 | -3.79475500 |
| C  | 3.12414700 | -1.97363000 | 2.45608900  |
| C  | 2.53761600 | -1.69971700 | 3.69616900  |
| C  | 3.93581800 | -3.10058800 | 2.30587100  |
| C  | 2.76597400 | -2.54194000 | 4.77661300  |
| H  | 1.90069200 | -0.82166000 | 3.81194500  |
| C  | 4.15610200 | -3.94458500 | 3.39004900  |
| H  | 4.39332300 | -3.32035600 | 1.34234700  |
| C  | 3.57345900 | -3.66612500 | 4.62212200  |
| H  | 2.30907400 | -2.32623900 | 5.73904500  |
| H  | 4.78575800 | -4.82250900 | 3.27039800  |
| H  | 3.74662900 | -4.32918800 | 5.46590500  |
| Au | 0.56058700 | -0.11137600 | 0.99659600  |

**TS6-d:**

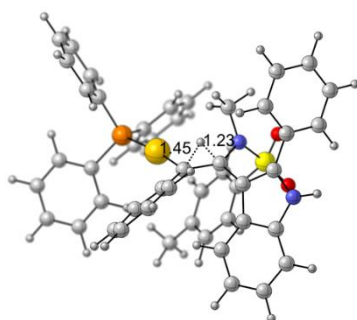

|   |             |            |             |
|---|-------------|------------|-------------|
| C | -5.39284300 | 3.71754400 | -1.71037500 |
| C | -4.89805400 | 2.45434400 | -1.40438000 |
| C | -3.66803200 | 2.24811200 | -0.74075100 |
| C | -2.90393000 | 3.37244500 | -0.39376100 |
| C | -3.38681700 | 4.63455700 | -0.70284300 |
| C | -4.61877200 | 4.80859900 | -1.34976800 |
| H | -6.34407500 | 3.84167400 | -2.22221200 |

|   |             |             |             |
|---|-------------|-------------|-------------|
| H | -1.95155000 | 3.26692200  | 0.12228300  |
| H | -2.80248300 | 5.50979500  | -0.42997900 |
| H | -4.97012100 | 5.81217500  | -1.57390000 |
| C | -3.50261200 | 0.81811400  | -0.63485500 |
| C | -4.62209500 | 0.23024200  | -1.21270200 |
| C | -4.94590100 | -1.18718500 | -1.38413300 |
| C | -5.20965600 | -1.69648900 | -2.65957500 |
| C | -4.96582700 | -2.04522000 | -0.28031500 |
| C | -5.47566000 | -3.05038000 | -2.82483500 |
| H | -5.15402900 | -1.03221700 | -3.52024700 |
| C | -5.23805800 | -3.39769900 | -0.44986700 |
| H | -4.79706500 | -1.63992500 | 0.71789500  |
| C | -5.48986000 | -3.90156500 | -1.72296500 |
| H | -5.66448800 | -3.44462000 | -3.81995600 |
| H | -5.26569900 | -4.05802000 | 0.41354500  |
| H | -5.70135300 | -4.95943000 | -1.85648100 |
| N | -5.44490000 | 1.21104900  | -1.66791800 |
| H | -2.36146600 | -0.62063500 | 0.72389100  |
| H | -6.34621000 | 1.03982400  | -2.09063500 |
| C | -3.29033000 | 2.29168800  | 3.33957800  |
| C | -3.00220100 | 1.38035500  | 2.33686400  |
| C | -1.70995100 | 1.30209500  | 1.79093500  |
| C | -0.71672600 | 2.15155300  | 2.30595800  |
| C | -1.02154100 | 3.09671700  | 3.27731900  |
| C | -2.30761500 | 3.16598000  | 3.80061700  |
| H | -4.29203200 | 2.32834600  | 3.75934700  |
| H | -3.79094000 | 0.72469000  | 1.97246900  |
| H | 0.29845200  | 2.08441900  | 1.91379600  |
| H | -0.24471100 | 3.76327300  | 3.64247000  |
| H | -2.54357400 | 3.88945500  | 4.57653800  |
| C | -1.32990900 | 0.40275700  | 0.68954800  |
| C | -2.29992600 | 0.04769300  | -0.31205400 |
| N | -1.97695500 | -0.94645000 | -1.29939500 |
| S | -1.59267000 | -0.41926800 | -2.88311600 |
| O | -1.24732200 | -1.64114700 | -3.58693900 |
| O | -2.64698300 | 0.46037900  | -3.34981700 |
| C | -0.12832300 | 0.55565500  | -2.66456800 |
| C | 1.11587300  | -0.05733300 | -2.78766200 |
| C | -0.24434800 | 1.90646100  | -2.34557900 |
| C | 2.26135500  | 0.70390500  | -2.59559700 |
| H | 1.18032200  | -1.10859400 | -3.06058000 |
| C | 0.91357200  | 2.64561700  | -2.13480700 |
| H | -1.22634200 | 2.37315100  | -2.28060700 |
| C | 2.17811100  | 2.06078800  | -2.26683500 |
| H | 3.24079600  | 0.23960500  | -2.71029700 |
| H | 0.83554100  | 3.70487500  | -1.89257600 |
| C | 3.42601300  | 2.87415400  | -2.10534600 |
| H | 3.79802200  | 3.21376900  | -3.07996100 |
| H | 3.25171500  | 3.76805700  | -1.49633100 |
| H | 4.22846000  | 2.28833600  | -1.63996000 |

|    |             |             |             |
|----|-------------|-------------|-------------|
| C  | -1.50772100 | -2.27818700 | -0.93077600 |
| H  | -0.41689700 | -2.34847100 | -0.79903100 |
| H  | -1.99096500 | -2.56097200 | 0.01180900  |
| H  | -1.82371600 | -2.98591600 | -1.70048400 |
| P  | 2.88828300  | -1.02603300 | 1.03750600  |
| C  | 3.86199300  | 0.35848900  | 1.70489900  |
| C  | 4.89093100  | 0.15280200  | 2.62688100  |
| C  | 3.60200900  | 1.64869000  | 1.22871400  |
| C  | 5.65131400  | 1.23086700  | 3.06861800  |
| H  | 5.09676300  | -0.84875700 | 3.00146800  |
| C  | 4.37142800  | 2.72023100  | 1.66654400  |
| H  | 2.80000500  | 1.81009300  | 0.50414300  |
| C  | 5.39360900  | 2.51133500  | 2.58891900  |
| H  | 6.44823000  | 1.06903500  | 3.78981100  |
| H  | 4.17025500  | 3.72118400  | 1.29191100  |
| H  | 5.99039500  | 3.35079700  | 2.93649800  |
| C  | 3.75344000  | -1.55295600 | -0.47460200 |
| C  | 3.15530700  | -2.54188200 | -1.26310400 |
| C  | 4.97430800  | -0.99891700 | -0.86414800 |
| C  | 3.76911100  | -2.96775800 | -2.43367500 |
| H  | 2.20420900  | -2.98004700 | -0.95656500 |
| C  | 5.58388200  | -1.42513000 | -2.04211400 |
| H  | 5.44953800  | -0.23355600 | -0.25211400 |
| C  | 4.98196500  | -2.40356200 | -2.82673400 |
| H  | 3.30114600  | -3.73672700 | -3.04314400 |
| H  | 6.53406500  | -0.99211100 | -2.34434000 |
| H  | 5.45947500  | -2.73187400 | -3.74635400 |
| C  | 3.07410600  | -2.39794800 | 2.21509300  |
| C  | 2.20093100  | -2.46616500 | 3.30571200  |
| C  | 4.09678900  | -3.34136600 | 2.08167900  |
| C  | 2.35288900  | -3.46852700 | 4.25607300  |
| H  | 1.40237000  | -1.73063200 | 3.40848800  |
| C  | 4.24040000  | -4.34519100 | 3.03342800  |
| H  | 4.77978700  | -3.29193200 | 1.23480900  |
| C  | 3.37051200  | -4.40865700 | 4.11789400  |
| H  | 1.67281200  | -3.52003900 | 5.10239200  |
| H  | 5.03409800  | -5.08014100 | 2.92696300  |
| H  | 3.48449100  | -5.19641300 | 4.85823600  |
| Au | 0.63245500  | -0.35897600 | 0.73652900  |

**PD-d:**

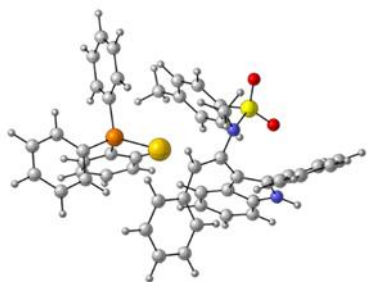



|   |             |             |             |
|---|-------------|-------------|-------------|
| C | -3.01325200 | 4.29413400  | -0.89035900 |
| C | -3.24290100 | 2.92111500  | -0.89349600 |
| C | -2.30857500 | 1.98769100  | -0.39071000 |
| C | -1.12024600 | 2.47187500  | 0.16836900  |
| C | -0.88210700 | 3.83696400  | 0.17629600  |
| C | -1.81546000 | 4.74065600  | -0.35443900 |
| H | -3.74659700 | 4.98865100  | -1.29289600 |
| H | -0.39374800 | 1.78932300  | 0.61225200  |
| H | 0.03613200  | 4.21361200  | 0.62321600  |
| H | -1.60438200 | 5.80648300  | -0.33147600 |
| C | -2.87117200 | 0.68022600  | -0.62809300 |
| C | -4.13036100 | 0.87181300  | -1.18996200 |
| C | -5.17078400 | -0.09798400 | -1.52072600 |
| C | -5.93288100 | 0.04986200  | -2.68440000 |
| C | -5.43150800 | -1.17005900 | -0.65931100 |
| C | -6.93557800 | -0.86317900 | -2.98222100 |
| H | -5.70029800 | 0.85457500  | -3.37953600 |
| C | -6.43248500 | -2.08321000 | -0.96396800 |
| H | -4.86702600 | -1.26247200 | 0.26905800  |
| C | -7.18662000 | -1.93030100 | -2.12429600 |
| H | -7.51572400 | -0.74897500 | -3.89418400 |
| H | -6.63682300 | -2.90787900 | -0.28571200 |
| H | -7.97217500 | -2.64370800 | -2.35987300 |
| N | -4.33452100 | 2.20962000  | -1.35304800 |
| H | -1.59207500 | -2.25895600 | 0.67483900  |
| H | -5.21315200 | 2.60936800  | -1.65053500 |
| C | -3.18795700 | 0.59280800  | 3.81883400  |
| C | -2.92652100 | 0.32660300  | 2.47849400  |
| C | -2.14938200 | -0.77966300 | 2.11202600  |
| C | -1.65039000 | -1.60205000 | 3.13833100  |
| C | -1.90593700 | -1.32845700 | 4.47407800  |
| C | -2.67769600 | -0.22315700 | 4.82221200  |
| H | -3.80120800 | 1.45254800  | 4.07762400  |
| H | -3.34164700 | 0.98095400  | 1.71883200  |
| H | -1.04828100 | -2.47292600 | 2.87433800  |
| H | -1.50972400 | -1.98709100 | 5.24362600  |
| H | -2.88543900 | -0.00422100 | 5.86631800  |
| C | -1.79997400 | -1.18755200 | 0.72228200  |
| C | -2.27627500 | -0.64151700 | -0.49122200 |
| N | -2.26211400 | -1.41412500 | -1.63278900 |
| S | -1.89233500 | -0.71337400 | -3.22496100 |
| O | -1.73069400 | -1.88697600 | -4.06143900 |
| O | -2.85991500 | 0.31319500  | -3.54941200 |
| C | -0.30963000 | 0.05225800  | -3.01641600 |
| C | 0.83085800  | -0.75198400 | -3.03118300 |
| C | -0.22095700 | 1.44056800  | -2.97413600 |
| C | 2.07814300  | -0.14526200 | -3.01959700 |
| H | 0.74004000  | -1.83456600 | -3.10223600 |
| C | 1.03889800  | 2.02667100  | -2.95726800 |
| H | -1.12326600 | 2.04777700  | -2.98076400 |

|    |             |             |             |
|----|-------------|-------------|-------------|
| C  | 2.20048600  | 1.24962100  | -2.99499200 |
| H  | 2.97628000  | -0.76113400 | -3.05716800 |
| H  | 1.12065400  | 3.11327600  | -2.93640500 |
| C  | 3.55436000  | 1.88779200  | -2.99925800 |
| H  | 4.23296600  | 1.37793800  | -3.69192800 |
| H  | 3.50315000  | 2.94463800  | -3.27961600 |
| H  | 4.01181200  | 1.83372300  | -2.00118300 |
| C  | -2.06476300 | -2.85990700 | -1.54756900 |
| H  | -1.03070200 | -3.12559700 | -1.27610400 |
| H  | -2.75578400 | -3.25705600 | -0.79751900 |
| H  | -2.30075400 | -3.30808900 | -2.51106100 |
| P  | 2.64659600  | -0.33759900 | 1.02142100  |
| C  | 3.16670600  | 1.40087800  | 1.11486500  |
| C  | 4.21621300  | 1.79952000  | 1.94910100  |
| C  | 2.53155400  | 2.34164000  | 0.29907400  |
| C  | 4.63212700  | 3.12641600  | 1.95145100  |
| H  | 4.70581800  | 1.07313000  | 2.59670800  |
| C  | 2.95782300  | 3.66516200  | 0.29933300  |
| H  | 1.70726300  | 2.03800400  | -0.34799300 |
| C  | 4.00704500  | 4.05741000  | 1.12566100  |
| H  | 5.44639900  | 3.43513800  | 2.60178400  |
| H  | 2.46461200  | 4.38869800  | -0.34774100 |
| H  | 4.33680400  | 5.09321200  | 1.13111100  |
| C  | 3.71987600  | -1.14586100 | -0.20333900 |
| C  | 3.33804600  | -2.40080600 | -0.69101500 |
| C  | 4.90439000  | -0.55789000 | -0.65118400 |
| C  | 4.13168800  | -3.05773400 | -1.62225900 |
| H  | 2.40970100  | -2.85754400 | -0.34407900 |
| C  | 5.69176000  | -1.21521700 | -1.59328600 |
| H  | 5.21226400  | 0.41447800  | -0.26809700 |
| C  | 5.30589400  | -2.46055900 | -2.07922800 |
| H  | 3.83377600  | -4.03336200 | -1.99780800 |
| H  | 6.61076900  | -0.75296500 | -1.94481400 |
| H  | 5.92261800  | -2.97084100 | -2.81465900 |
| C  | 3.05332300  | -1.08018500 | 2.63009100  |
| C  | 2.15400400  | -0.89979000 | 3.68726100  |
| C  | 4.24282500  | -1.78294100 | 2.83738900  |
| C  | 2.44719500  | -1.41670000 | 4.94249300  |
| H  | 1.22054600  | -0.35758000 | 3.52631900  |
| C  | 4.52753000  | -2.30204000 | 4.09672500  |
| H  | 4.94470600  | -1.92727900 | 2.01723400  |
| C  | 3.63255100  | -2.11953200 | 5.14607900  |
| H  | 1.74641100  | -1.27495000 | 5.76144600  |
| H  | 5.45134100  | -2.85184700 | 4.25696500  |
| H  | 3.85786400  | -2.52956600 | 6.12727200  |
| Au | 0.35589700  | -0.63231000 | 0.59316100  |

## 9. Reference

1. M. Chen, N. Sun, H. Chen and Y. Liu, Dioxazoles, a new mild nitrene transfer reagent in gold catalysis: highly efficient synthesis of functionalized oxazoles, *Chem. Commun.*, 2016, **52**, 6324-6327.
2. L. Z. Yu, Y. Wei and M. Shi, Copper-catalyzed trifluoromethylazidation and rearrangement of aniline-linked 1,7-enynes: access to CF<sub>3</sub>-substituted azaspirocyclic dihydroquinolin-2-ones and furoindolines, *Chem. Commun.*, 2017, **53**, 8980-8983.
3. M. J. Frisch, G. W. Trucks, H. B. Schlegel, G. E. Scuseria, M. A. Robb, J. R. Cheeseman, G. Scalmani, V. Barone, G. A. Petersson, H. Nakatsuji, X. Li, M. Caricato, A. V. Marenich, J. Bloino, B. G. Janesko, R. Gomperts, B. Mennucci, H. P. Hratchian, J. V. Ortiz, A. F. Izmaylov, J. L. Sonnenberg, Williams, F. Ding, F. Lipparini, F. Egidi, J. Goings, B. Peng, A. Petrone, T. Henderson, D. Ranasinghe, V. G. Zakrzewski, J. Gao, N. Rega, G. Zheng, W. Liang, M. Hada, M. Ehara, K. Toyota, R. Fukuda, J. Hasegawa, M. Ishida, T. Nakajima, Y. Honda, O. Kitao, H. Nakai, T. Vreven, K. Throssell, J. A. Montgomery Jr., J. E. Peralta, F. Ogliaro, M. J. Bearpark, J. J. Heyd, E. N. Brothers, K. N. Kudin, V. N. Staroverov, T. A. Keith, R. Kobayashi, J. Normand, K. Raghavachari, A. P. Rendell, J. C. Burant, S. S. Iyengar, J. Tomasi, M. Cossi, J. M. Millam, M. Klene, C. Adamo, R. Cammi, J. W. Ochterski, R. L. Martin, K. Morokuma, O. Farkas, J. B. Foresman and D. J. Fox, Gaussian 16, Revision B.01, Gaussian, Inc., Wallingford CT, 2016.
4. (a)Y. Zhao and D. G. Truhlar, The M06 suite of density functionals for main group thermochemistry, thermochemical kinetics, noncovalent interactions, excited states, and transition elements: two new functionals and systematic testing of four M06-class functionals and 12 other functionals, *Theor Chem Acc*, 2007, **120**, 215-241; (b)Y. Liu, Z. Yu, J. Z. Zhang, L. Liu, F. Xia and J. Zhang, Origins of unique gold-catalysed chemo- and site-selective C-H functionalization of phenols with diazo compounds, *Chem. Sci.*, 2016, **7**, 1988-1995.
5. (a)J. Becker, Y. Y. Zhyhadlo, E. D. Butova, A. A. Fokin, P. R. Schreiner, M. Forster, M. C. Holthausen, P. Specht and S. Schindler, Aerobic aliphatic hydroxylation reactions by Copper complexes: a simple clip-and-cleave concept, *Chem. Eur. J.*, 2018, **24**, 15543-15549; (b)S. Dahiya, P. Kumar, V. C. Srivastava and V. Kumar, Production of dimethyl carbonate using a zirconium-praseodymium-based catalyst from methanol and propylene carbonate: an experimental and DFT study, *Ind. Eng. Chem. Res.*, 2023, **62**, 6920-6931.
6. CYLview, 1.0b; Legault, C. Y., Université de Sherbrooke, 2009 (<http://www.cylview.org>).
